# Supplementary material for: Transcriptomic Responses of Skeletal Muscle to Acute Exercise in Diabetic Goto-Kakizaki Rats
Source: Front Physiol. 2019 Jul 9;10:872. doi: 10.3389/fphys.2019.00872 (PMC6629899; doi:10.3389/fphys.2019.00872)
Supplement: TABLE S1 — The qRT-PCR primers. [file Table_1.xlsx]

## Sheet: Sheet1
Gene	Sense	Anti-Sense	Length(bp)
Actb	AGGGTGTGATGGTGGGTATGGG	GGTGACAATGCCGTGTTCAATGG	110bp
Ppargc1a	GAGGACACGAGGAAAGGAAGACT	ACTGGCTTGAATCTGTGGAAGAAC	198bp
Sorbs1	ACAGAGGGCAAGGGCAAGAA	CTAGTGTCGGGAAGGTCAGAG	120bp
Tbc1d1	AGTGTATCGAGAAGTTCAACCA	TCGTTATCGAAGGAGCTAAAGG	196bp
Lpin1	CGGAAGATGGCTGATAAAATCC	CTCCTCATTCACAAACTGCATT	144bp
Hk2	ATAAGGATGGAATCGAGAAGGC	CTTGTTCTCTTTGATTCGCCAC	170bp
Fasn	GAAACTGTGCTCATTCACTCG	ATGTGTCTCGAGAGTTAGCAAA	175bp
Slc27a1	AGTGCAGTACATCGGTGAAATA	TAGAACTCGCCAATCTGTCG	162bp
