# Supplementary material for: Transcriptomic Responses of Skeletal Muscle to Acute Exercise in Diabetic Goto-Kakizaki Rats
Source: Front Physiol. 2019 Jul 9;10:872. doi: 10.3389/fphys.2019.00872 (PMC6629899; doi:10.3389/fphys.2019.00872)
Supplement: TABLE S2 — The details of DEGs among the three comparisons. [file Table_2.XLSX]

## Sheet: DEGs in GK vs. W
Differentially expressed genes in GK vs. Wistar
Ensembl ID	Gene	logFC	PValue	FDR
ENSRNOG00000000034	Nuak2	1.06223	6.3183e-05	0.00164134
ENSRNOG00000000040	RGD1304622	-0.79677	0.00377122	0.0448215
ENSRNOG00000000167	Alas2	0.90331	2.96211e-06	0.000120462
ENSRNOG00000000172	Sqrdl	1.06204	5.74195e-10	4.53971e-08
ENSRNOG00000000257	Smpd3	0.697312	2.45969e-05	0.000745463
ENSRNOG00000000302	Sesn1	-0.594453	5.45638e-05	0.00144696
ENSRNOG00000000321	Cd24	-0.880109	1.31804e-07	6.96156e-06
ENSRNOG00000000410	Nepn	-3.36306	8.03952e-22	1.82741e-19
ENSRNOG00000000443	C4a	-1.26468	2.13851e-16	3.0933e-14
ENSRNOG00000000451	RT1-Ba	-0.751373	1.30937e-06	5.8894e-05
ENSRNOG00000000473	Pfdn6	-0.642026	8.3401e-06	0.000294075
ENSRNOG00000000495	Uhrf1bp1	0.677775	1.33412e-05	0.000439949
ENSRNOG00000000512	Slc26a8	1.19475	1.64984e-05	0.000526336
ENSRNOG00000000536	Mdga1	0.836831	1.40176e-06	6.2388e-05
ENSRNOG00000000540	Btbd9	-0.74875	5.36937e-05	0.00143284
ENSRNOG00000000563	Adamts 14	-0.632155	0.00437681	0.0495348
ENSRNOG00000000576	Anapc16	0.832172	1.95746e-08	1.17531e-06
ENSRNOG00000000633	Rhobtb1	-0.943862	1.32282e-10	1.16125e-08
ENSRNOG00000000635	Arid5b	0.632846	0.000247711	0.00511869
ENSRNOG00000000700	Tmem119	-0.826971	0.00203585	0.0281067
ENSRNOG00000000795	RT1-N3	-0.608916	0.00216622	0.0296077
ENSRNOG00000000836	Ltb	1.15726	2.07059e-10	1.7571e-08
ENSRNOG00000000906	Medag	0.593362	5.24154e-05	0.00140462
ENSRNOG00000000967	Aacs	0.795264	0.000317881	0.00634996
ENSRNOG00000001032	Ccz1b	-0.600212	8.53327e-05	0.0021298
ENSRNOG00000001052	Slc25a30	0.99959	5.49927e-11	5.10951e-09
ENSRNOG00000001082	Abcb9	0.655633	8.28834e-06	0.000293062
ENSRNOG00000001158	Abcg1	0.660706	0.00108684	0.0170662
ENSRNOG00000001189	Sik1	0.657608	6.42171e-05	0.00165805
ENSRNOG00000001242	Gstt3	-1.28593	6.63286e-09	4.17969e-07
ENSRNOG00000001250	Lfng	0.69015	0.000102466	0.00247493
ENSRNOG00000001287	Gper1	-1.13789	0.000124634	0.00291094
ENSRNOG00000001314	Fam20c	-0.727068	3.02481e-06	0.000122621
ENSRNOG00000001317	Zfp68	0.600793	4.07602e-05	0.00113531
ENSRNOG00000001325	Il3ra	-0.806655	0.00177125	0.0252195
ENSRNOG00000001344	Aldh2	-0.698404	2.06301e-05	0.000637379
ENSRNOG00000001376	Mettl7a	-0.978648	3.06778e-11	2.91416e-09
ENSRNOG00000001414	Serpine1	-0.788766	4.92001e-07	2.368e-05
ENSRNOG00000001425	Sh2b2	0.612721	0.000132723	0.00306056
ENSRNOG00000001557	Cxadr	1.12652	9.46824e-06	0.000324855
ENSRNOG00000001578	Hoxd4	-0.701428	0.000712704	0.0120638
ENSRNOG00000001580	Hoxd9	-0.613806	0.000388435	0.00735772
ENSRNOG00000001581	Hoxd10	-0.831187	0.000677271	0.0116186
ENSRNOG00000001621	C2cd2	0.594279	3.83953e-05	0.00108608
ENSRNOG00000001700	Dfnb31	1.61683	1.04269e-10	9.2814e-09
ENSRNOG00000001704	Runx1	-0.703862	0.000601396	0.0105589
ENSRNOG00000001736	Bdh1	0.96276	0.000188837	0.00413008
ENSRNOG00000001770	Ehhadh	-0.634349	0.000887445	0.0145571
ENSRNOG00000001842	Mrps35	-1.06988	5.22677e-13	5.94032e-11
ENSRNOG00000001847	Ccdc91	0.657561	2.59405e-05	0.000780606
ENSRNOG00000001892	Tbx1	0.858024	8.52148e-08	4.63547e-06
ENSRNOG00000001912	Tecrl	-0.914018	2.81014e-06	0.000115017
ENSRNOG00000001963	Mx2	1.03159	5.44035e-11	5.09193e-09
ENSRNOG00000002163	Klf3	0.585078	5.43832e-05	0.00144519
ENSRNOG00000002180	Tbc1d1	0.715644	3.15079e-06	0.000126919
ENSRNOG00000002303	Kcnj12	0.663922	1.42494e-05	0.000463928
ENSRNOG00000002343	Uchl1	1.25271	2.89184e-06	0.000117981
ENSRNOG00000002365	Itm2a	0.638097	0.00010956	0.0026116
ENSRNOG00000002419	Plp1	1.25614	1.68483e-14	2.06214e-12
ENSRNOG00000002903	Specc1	0.967807	8.37484e-10	6.38343e-08
ENSRNOG00000003094	Cmah	1.23842	1.1328e-09	8.38335e-08
ENSRNOG00000003108	Acbd4	-1.88194	6.27195e-26	1.90085e-23
ENSRNOG00000003114	B4galt4	0.730227	0.000591196	0.0104085
ENSRNOG00000003134	Slc4a4	0.798576	3.10774e-06	0.000125582
ENSRNOG00000003147	Sqstm1	-0.671394	0.000163864	0.00365934
ENSRNOG00000003171	Mpz	0.898569	4.88089e-08	2.78604e-06
ENSRNOG00000003183	Fmod	-0.633804	7.31025e-05	0.00185733
ENSRNOG00000003195	Caskin1	0.819142	0.00307763	0.038407
ENSRNOG00000003209	Pcp4l1	0.933046	8.4556e-06	0.000297324
ENSRNOG00000003232	Slc9a3r1	0.863988	1.73066e-06	7.54438e-05
ENSRNOG00000003248	Mpzl1	-0.62184	6.88131e-05	0.00176169
ENSRNOG00000003278	Map3k14	-0.68956	0.000139222	0.00319884
ENSRNOG00000003291	Creg1	-0.635652	5.73577e-05	0.00150848
ENSRNOG00000003304	Chad	-0.65926	0.000194592	0.00422689
ENSRNOG00000003330	Acsf2	-1.0336	2.59093e-09	1.73579e-07
ENSRNOG00000003439	Il15	-0.661126	0.000132412	0.00305893
ENSRNOG00000003463	Srebf1	-0.818392	4.98885e-07	2.38734e-05
ENSRNOG00000003486	Mnda	0.819308	2.38505e-06	0.000100196
ENSRNOG00000003496	Tbc1d9	0.78479	0.000359195	0.00694861
ENSRNOG00000003510	Fmo2	0.610607	2.7645e-05	0.000827984
ENSRNOG00000003515	Ephx1	-0.61918	2.35822e-05	0.000716416
ENSRNOG00000003538	Adamts4	2.5448	4.36931e-20	9.11753e-18
ENSRNOG00000003562	Susd4	0.687472	0.000527849	0.00946337
ENSRNOG00000003606	AABR07014550.1	4.46005	6.93691e-41	4.90555e-38
ENSRNOG00000003620	Fmo3	0.650931	0.000322665	0.00639752
ENSRNOG00000003721	Paqr4	0.892536	5.21135e-08	2.9614e-06
ENSRNOG00000003741	Nptx1	-1.52139	5.85574e-07	2.77092e-05
ENSRNOG00000003745	Atf3	0.634254	1.36188e-05	0.000447422
ENSRNOG00000003773	Hmox2	-0.805412	1.08096e-07	5.78131e-06
ENSRNOG00000003832	Vash2	-0.589706	9.66666e-05	0.00235271
ENSRNOG00000003887	Lgi2	1.02201	1.79685e-12	1.87477e-10
ENSRNOG00000003927	Cd55	-0.890238	1.44305e-09	1.03194e-07
ENSRNOG00000003984	Apln	0.869184	9.19867e-05	0.00227359
ENSRNOG00000004009	Xpnpep2	-0.852014	0.00286497	0.0364682
ENSRNOG00000004160	Prps2	-1.35151	5.33769e-13	6.01269e-11
ENSRNOG00000004377	Lpin1	0.605478	0.000287812	0.00585234
ENSRNOG00000004398	Pkhd1l1	-0.791792	1.51715e-05	0.000491393
ENSRNOG00000004442	RGD1311756	-0.898946	1.23583e-08	7.52672e-07
ENSRNOG00000004458	Ston2	1.01127	1.37181e-09	9.86538e-08
ENSRNOG00000004461	Flywch2	0.654295	0.00380418	0.045087
ENSRNOG00000004578	Cthrc1	-1.31023	1.83822e-06	7.93177e-05
ENSRNOG00000004710	Rbks	-0.679086	0.00284292	0.0362954
ENSRNOG00000004754	Tc2n	-1.29775	8.16498e-10	6.26097e-08
ENSRNOG00000004755	Commd9	-0.898931	9.36685e-10	7.05507e-08
ENSRNOG00000004857	L2hgdh	0.693914	2.13044e-05	0.000656618
ENSRNOG00000004947	Zfp871	0.804853	8.75947e-06	0.000305478
ENSRNOG00000004964	Erbb3	0.87979	1.37653e-05	0.000450432
ENSRNOG00000005053	Egln3	-0.656225	1.64052e-05	0.000524677
ENSRNOG00000005151	Dync2li1	-0.627169	0.00190873	0.0267875
ENSRNOG00000005177	Tp53i3	-2.19698	4.0683e-39	2.58927e-36
ENSRNOG00000005193	LOC100912917	0.618199	0.000106981	0.00255489
ENSRNOG00000005229	Sec16b	-0.724521	0.000213491	0.00451416
ENSRNOG00000005342	Rassf5	-1.08966	1.42506e-05	0.000463928
ENSRNOG00000005575	Abi3	0.830437	0.000290757	0.00589634
ENSRNOG00000005600	Nr4a2	0.980483	6.36523e-05	0.00165016
ENSRNOG00000005659	Aurkb	0.849286	0.00298623	0.0375982
ENSRNOG00000005705	Qpct	0.803015	0.000196536	0.00424739
ENSRNOG00000005731	Birc3	-0.758869	0.00024172	0.00501116
ENSRNOG00000005749	Foxred2	1.3271	1.93483e-09	1.3385e-07
ENSRNOG00000005767	Tulp3	0.596896	0.00421856	0.0485516
ENSRNOG00000005792	Ankef1	0.906908	0.000196	0.004243
ENSRNOG00000005801	Stx17	-0.962826	1.63946e-06	7.19535e-05
ENSRNOG00000005850	Gdap1	1.00406	4.88228e-07	2.36299e-05
ENSRNOG00000005905	Pde4b	1.12965	1.63041e-14	2.0149e-12
ENSRNOG00000005930	Nnmt	-0.913857	0.000293709	0.00593433
ENSRNOG00000005964	Nr4a3	3.12302	8.76074e-82	1.39394e-78
ENSRNOG00000006019	G0s2	3.07268	5.41416e-85	9.84527e-82
ENSRNOG00000006025	Lamb3	1.04761	4.44492e-06	0.000171453
ENSRNOG00000006131	Mettl2b	-1.79125	1.55106e-12	1.63169e-10
ENSRNOG00000006136	Pdpk1	0.623833	9.44736e-05	0.00231968
ENSRNOG00000006199	Ispd	-0.634884	0.000219635	0.00461341
ENSRNOG00000006334	Txndc16	0.642896	0.000252993	0.00521092
ENSRNOG00000006611	Nostrin	0.947341	0.00114282	0.0178053
ENSRNOG00000006646	Vopp1	0.714538	4.1956e-05	0.00116353
ENSRNOG00000006738	Fbxo32	-1.99992	5.70358e-34	2.79234e-31
ENSRNOG00000006767	Cst7	-0.885209	0.000116528	0.00276217
ENSRNOG00000006779	Crot	-0.753536	1.90107e-07	9.83269e-06
ENSRNOG00000007029	Dnaja1	0.686043	1.68377e-05	0.00053183
ENSRNOG00000007046	Cfap70	-0.800891	2.51318e-07	1.25509e-05
ENSRNOG00000007078	Wisp1	-0.62428	0.00393263	0.0462154
ENSRNOG00000007219	LOC103692716	0.844822	1.65269e-07	8.65725e-06
ENSRNOG00000007324	Plxna2	0.667698	3.63164e-06	0.000142237
ENSRNOG00000007359	Gca	0.606314	0.000254521	0.00523392
ENSRNOG00000007426	Tmem64	-0.831815	4.67671e-08	2.7059e-06
ENSRNOG00000007433	Cyb561	-0.880613	2.20133e-05	0.000675199
ENSRNOG00000007475	Gpihbp1	0.630013	0.000148249	0.00336374
ENSRNOG00000007495	Smpx	-1.01351	1.34982e-09	9.76239e-08
ENSRNOG00000007545	Angptl4	0.772614	1.17322e-05	0.000392997
ENSRNOG00000007574	Padi2	0.95169	1.4549e-08	8.81879e-07
ENSRNOG00000007587	Tcp11l2	-0.677982	7.00106e-06	0.000253261
ENSRNOG00000007600	Igsf1	0.913578	1.55543e-05	0.000501242
ENSRNOG00000007610	Gdf11	0.597359	0.00194505	0.0272071
ENSRNOG00000007625	B3galt1	1.04206	0.000181678	0.00400793
ENSRNOG00000007763	Plod1	0.644549	1.43004e-05	0.000464361
ENSRNOG00000007808	Nap1l5	1.61052	1.7345e-09	1.22658e-07
ENSRNOG00000007830	Apold1	0.857021	3.24982e-07	1.6159e-05
ENSRNOG00000007896	Klhl38	-0.703156	1.12575e-06	5.15454e-05
ENSRNOG00000007964	Tp53inp1	-0.838148	4.21048e-05	0.00116511
ENSRNOG00000008012	Abcb1a	0.611058	5.14407e-05	0.00138433
ENSRNOG00000008030	Shc2	-0.720582	0.00302833	0.037866
ENSRNOG00000008115	Arhgap11a	0.744311	0.00069786	0.0119236
ENSRNOG00000008137	Cdk18	-0.872151	0.000287034	0.00584586
ENSRNOG00000008165	Tpx2	-1.46015	3.02937e-23	7.41554e-21
ENSRNOG00000008170	Jph2	0.592084	0.000453266	0.00831359
ENSRNOG00000008190	Pnpla7	-0.626976	4.64296e-05	0.00126553
ENSRNOG00000008209	St3gal1	0.643301	7.66936e-05	0.00193697
ENSRNOG00000008245	Ptgis	-0.793663	0.000144805	0.00330326
ENSRNOG00000008515	Tmem45b	-0.878307	0.00011892	0.00279803
ENSRNOG00000008533	Ago2	0.601331	0.000268825	0.00549258
ENSRNOG00000008620	Smad3	0.615311	0.000209855	0.00446696
ENSRNOG00000008688	Usp45	-1.01403	4.38184e-10	3.53015e-08
ENSRNOG00000008706	Tbx3	0.707732	0.000823858	0.0136548
ENSRNOG00000008754	Flvcr2	-0.755956	0.00156102	0.0227869
ENSRNOG00000008758	Tspan18	-0.594385	0.00405221	0.0470625
ENSRNOG00000008830	Nfe2l1	-0.653542	0.000105123	0.00251524
ENSRNOG00000008915	Prima1	1.8808	1.3621e-35	7.22422e-33
ENSRNOG00000008942	RGD1304963	0.848448	1.66806e-07	8.70196e-06
ENSRNOG00000009084	Rpusd3	-0.614512	0.000858095	0.0141454
ENSRNOG00000009096	Pon3	0.771917	3.60485e-06	0.000141825
ENSRNOG00000009117	Otub2	0.924184	2.47514e-07	1.2453e-05
ENSRNOG00000009199	Accs	-0.80403	0.000212396	0.00450598
ENSRNOG00000009225	Copz2	-0.722466	2.15623e-05	0.000662962
ENSRNOG00000009298	Fbxo44	0.729676	0.00218126	0.0297273
ENSRNOG00000009329	Nr1d1	-2.40592	5.8912e-45	4.41112e-42
ENSRNOG00000009345	Ugt8	0.992616	7.00352e-06	0.000253261
ENSRNOG00000009373	RGD1562690	-1.34826	1.69342e-19	3.31623e-17
ENSRNOG00000009389	Ripk2	-0.616735	0.000202149	0.00434887
ENSRNOG00000009512	Esd	-0.615758	2.80816e-05	0.000836586
ENSRNOG00000009539	Khdrbs3	0.662815	0.00351784	0.0424039
ENSRNOG00000009589	LOC102552055	-0.645973	1.04187e-05	0.000354596
ENSRNOG00000009686	Aqp7	1.30347	1.50668e-11	1.49832e-09
ENSRNOG00000009691	Lrrn2	-0.938993	0.000681574	0.0116767
ENSRNOG00000009708	Tas1 r1	0.682355	0.00443844	0.0499531
ENSRNOG00000009734	Akr1b8	1.4632	4.16294e-17	6.30833e-15
ENSRNOG00000009802	Fam124a	-2.89283	3.71083e-28	1.27663e-25
ENSRNOG00000009899	Skil	0.948098	2.02776e-08	1.2118e-06
ENSRNOG00000009912	Fgr	0.850849	0.0017125	0.0245202
ENSRNOG00000010053	Calcr	1.04197	0.000153653	0.00347398
ENSRNOG00000010060	Panx1	-0.844679	0.000189512	0.00413773
ENSRNOG00000010079	Car3	-0.805899	0.000332055	0.00655307
ENSRNOG00000010098	Plek2	-1.46624	5.23771e-07	2.48772e-05
ENSRNOG00000010149	Cmc1	-0.668893	6.27234e-05	0.00163273
ENSRNOG00000010183	Fam198b	0.702227	1.64494e-06	7.19535e-05
ENSRNOG00000010253	Cd163	0.919291	5.38455e-10	4.28375e-08
ENSRNOG00000010265	Ada	0.607204	0.00191317	0.0268172
ENSRNOG00000010274	Smc4	1.02991	1.56144e-11	1.54074e-09
ENSRNOG00000010478	LOC299282	0.683372	5.81675e-06	0.000215237
ENSRNOG00000010551	Lhx2	1.06611	0.000371246	0.00710616
ENSRNOG00000010592	Slc25a27	-1.19561	1.96009e-05	0.000611519
ENSRNOG00000010716	Atoh8	0.985545	2.81936e-05	0.000836586
ENSRNOG00000010721	Dlgap5	0.845207	0.00216466	0.0296077
ENSRNOG00000010756	Tp53	-0.604884	9.99273e-05	0.0024182
ENSRNOG00000010789	Dusp7	0.864026	3.10366e-09	2.02598e-07
ENSRNOG00000010797	Esm1	-0.798607	0.00012175	0.00285716
ENSRNOG00000010802	Ube3d	-1.65116	2.10065e-11	2.04115e-09
ENSRNOG00000010833	Mthfd2	-0.963582	0.000436187	0.00808184
ENSRNOG00000010897	Nek6	0.651611	0.00302717	0.037866
ENSRNOG00000010940	Acad11	-0.961041	6.90665e-10	5.39354e-08
ENSRNOG00000010997	Ednrb	0.688589	0.000281975	0.00575201
ENSRNOG00000011025	Trmt10a	0.854465	7.71498e-05	0.00194234
ENSRNOG00000011119	LOC100363675	-0.61486	0.00110404	0.0172645
ENSRNOG00000011136	Osr2	0.997407	0.000124008	0.00290165
ENSRNOG00000011140	Fam213a	0.586847	0.000179382	0.00397106
ENSRNOG00000011145	Crhr2	1.62372	6.8365e-19	1.22566e-16
ENSRNOG00000011203	Farp1	-0.645829	1.25726e-05	0.000416763
ENSRNOG00000011228	Layn	1.54712	1.10471e-09	8.22329e-08
ENSRNOG00000011241	Tfdp2	0.874152	2.63623e-09	1.75689e-07
ENSRNOG00000011300	Lama3	1.07515	3.49141e-09	2.26746e-07
ENSRNOG00000011306	Myod1	1.53888	1.25638e-24	3.40266e-22
ENSRNOG00000011475	Srcin1	-1.18943	5.51165e-05	0.00145858
ENSRNOG00000011478	Ackr4	-1.3046	7.05168e-08	3.91193e-06
ENSRNOG00000011504	Akap2	0.587993	5.17331e-05	0.00138926
ENSRNOG00000011541	Cygb	-0.623497	4.26064e-05	0.00117389
ENSRNOG00000011572	Klc1	0.644736	8.33994e-05	0.00208564
ENSRNOG00000011591	Mettl21c	-0.722453	7.04604e-07	3.29739e-05
ENSRNOG00000011631	Fst	0.811218	0.000406537	0.00763247
ENSRNOG00000011647	S100a6	-0.729773	5.06379e-07	2.41412e-05
ENSRNOG00000011668	Nfil3	1.4582	2.3866e-21	5.32966e-19
ENSRNOG00000011675	Zfp40	-0.732572	0.00166416	0.0239898
ENSRNOG00000011705	Stmn2	0.867594	0.000762006	0.0127626
ENSRNOG00000011750	Fam180a	-0.853592	0.000743192	0.0125133
ENSRNOG00000011771	LOC100365697	-0.951714	7.73666e-10	5.96848e-08
ENSRNOG00000011821	S100a4	-0.6703	5.64993e-06	0.000210286
ENSRNOG00000011913	Cp	1.15877	2.10814e-15	2.79526e-13
ENSRNOG00000012081	Txn1	-0.590347	6.2601e-05	0.00163273
ENSRNOG00000012083	St6galnac2	-1.68756	5.21264e-12	5.35094e-10
ENSRNOG00000012141	Xrcc3	0.918074	0.000401089	0.00755246
ENSRNOG00000012183	Glrx	1.18933	7.90907e-14	9.40884e-12
ENSRNOG00000012196	Asah2	0.667189	8.82343e-05	0.00218935
ENSRNOG00000012274	Ddi2	-0.719175	4.48939e-06	0.000172645
ENSRNOG00000012393	S100a13	0.859266	1.04635e-05	0.000355172
ENSRNOG00000012428	Maf	0.795026	6.78635e-08	3.80544e-06
ENSRNOG00000012440	Msra	1.18652	7.96367e-08	4.36938e-06
ENSRNOG00000012482	Ndrg4	0.585861	0.00390069	0.0460166
ENSRNOG00000012500	Ddx10	-0.917549	6.27276e-08	3.54871e-06
ENSRNOG00000012557	Lgals5	3.46166	8.59167e-62	9.11361e-59
ENSRNOG00000012562	Grin3b	0.79189	0.0018572	0.0262962
ENSRNOG00000012591	Pkd2l1	0.87891	0.00169378	0.0243526
ENSRNOG00000012671	Gan	0.966662	0.000374588	0.00715936
ENSRNOG00000012682	Nr5a1	2.29185	2.72093e-19	5.24769e-17
ENSRNOG00000012684	Bloc1s2	0.824453	4.56706e-07	2.22736e-05
ENSRNOG00000012709	Bag2	-0.60447	3.02006e-05	0.000887813
ENSRNOG00000012726	Zbtb5	0.744777	1.23454e-05	0.000411372
ENSRNOG00000012749	C1qb	0.649569	7.36516e-06	0.000262608
ENSRNOG00000012779	Msr1	0.7387	0.000824994	0.0136559
ENSRNOG00000012853	Tk2	-0.832902	0.000182013	0.00400838
ENSRNOG00000012879	Fabp3	0.868087	9.03493e-07	4.15183e-05
ENSRNOG00000013009	Ldha	0.705424	0.000939788	0.0151858
ENSRNOG00000013018	Eda2r	-1.62195	4.77112e-16	6.47891e-14
ENSRNOG00000013045	Setd7	-0.633945	5.08565e-05	0.00137151
ENSRNOG00000013057	Prc1	0.84003	0.000399961	0.00754237
ENSRNOG00000013092	Lonrf3	1.22842	3.64762e-06	0.000142425
ENSRNOG00000013141	Eno2	0.961017	8.58029e-05	0.00213542
ENSRNOG00000013218	Sap30	-1.05165	1.23358e-08	7.52672e-07
ENSRNOG00000013257	Hecw2	1.27416	1.1407e-08	7.01449e-07
ENSRNOG00000013300	Atpif1	-0.603561	3.62992e-05	0.00102907
ENSRNOG00000013364	Hey2	-0.879695	0.00212972	0.0292756
ENSRNOG00000013390	Kbtbd8	0.587954	0.00239529	0.0318828
ENSRNOG00000013520	Mat2a	0.709357	1.62265e-05	0.00052027
ENSRNOG00000013609	Rn50_5_0814.26	-0.831955	0.00325123	0.0399513
ENSRNOG00000013663	Tmem86a	-0.946338	0.000142656	0.00326596
ENSRNOG00000013674	Megf10	0.58634	0.000815721	0.0135376
ENSRNOG00000013738	LOC100174910	0.619484	0.000127738	0.00296711
ENSRNOG00000013798	Fnbp1l	0.646311	0.000435743	0.00808184
ENSRNOG00000013973	Lcn2	4.24868	2.61967e-33	1.23503e-30
ENSRNOG00000014059	Odf2l	0.75049	0.00246758	0.0325828
ENSRNOG00000014080	Kif23	0.83083	0.00297006	0.0375058
ENSRNOG00000014090	Retsat	0.585335	0.000391971	0.00740268
ENSRNOG00000014117	Hmox1	0.720933	9.77378e-06	0.000333609
ENSRNOG00000014142	Ogfrl1	0.975988	4.52226e-10	3.62037e-08
ENSRNOG00000014143	Col24a1	1.28933	1.49675e-09	1.06436e-07
ENSRNOG00000014178	Acad9	0.656618	5.49378e-06	0.000205677
ENSRNOG00000014187	Igf1r	-0.659482	0.00267524	0.0345717
ENSRNOG00000014265	Tnfrsf19	-0.991691	0.000705213	0.0119978
ENSRNOG00000014303	Lrp11	0.602288	0.000333479	0.00656123
ENSRNOG00000014338	Slc25a25	1.29817	4.12455e-15	5.41251e-13
ENSRNOG00000014343	Anln	0.870343	0.00218621	0.0297629
ENSRNOG00000014368	Eif4g3	-0.652958	7.38252e-05	0.00187196
ENSRNOG00000014375	Adgrb2	6.30542	1.22079e-230	1.55394e-226
ENSRNOG00000014387	Chac1	-1.58472	7.21553e-27	2.29616e-24
ENSRNOG00000014448	Arntl	0.923599	1.06541e-08	6.58329e-07
ENSRNOG00000014456	Coq10b	0.641137	4.05552e-05	0.00113208
ENSRNOG00000014461	Galns	-0.706178	0.000318271	0.00634996
ENSRNOG00000014496	Coro6	-0.626214	0.000104995	0.00251524
ENSRNOG00000014505	Pmfbp1	0.727231	0.00226755	0.0305112
ENSRNOG00000014530	Nav2	0.68911	3.90908e-05	0.00110085
ENSRNOG00000014532	Lbp	-0.775376	0.000617363	0.0107209
ENSRNOG00000014548	Nedd9	0.59031	0.000379669	0.00723061
ENSRNOG00000014592	Zbtb46	1.06739	4.12442e-06	0.000159574
ENSRNOG00000014684	Npr1	0.796468	1.08023e-07	5.78131e-06
ENSRNOG00000014691	Ric3	1.16168	1.10801e-05	0.000374109
ENSRNOG00000014746	Dzip1l	0.925811	1.4389e-07	7.56848e-06
ENSRNOG00000014886	Fam107b	-0.88288	1.92981e-05	0.000603553
ENSRNOG00000014900	Crem	0.73318	6.41085e-07	3.02236e-05
ENSRNOG00000014928	Apba1	0.882487	0.00113368	0.0176845
ENSRNOG00000014940	Sfrp5	0.652744	0.00138636	0.0207367
ENSRNOG00000014948	Osgin1	0.76349	2.65088e-06	0.000110271
ENSRNOG00000015003	Pex11a	1.03922	7.86574e-05	0.00197092
ENSRNOG00000015055	Scg2	1.86682	9.96269e-12	1.00647e-09
ENSRNOG00000015076	Cyp26b1	0.679626	0.000466457	0.00850649
ENSRNOG00000015189	Bbs9	-0.592558	0.000430465	0.00802921
ENSRNOG00000015232	Pip5k1b	1.00702	0.000468361	0.008529
ENSRNOG00000015239	Ginm1	0.662216	1.97607e-05	0.000614999
ENSRNOG00000015253	Hsf4	-0.639694	0.000229232	0.0047678
ENSRNOG00000015264	Lrrc38	0.82913	1.99078e-05	0.000618065
ENSRNOG00000015283	Nt5c1a	0.853112	7.27835e-09	4.54147e-07
ENSRNOG00000015410	Aspn	0.656434	1.7391e-05	0.000547946
ENSRNOG00000015445	Mal	0.625169	0.000690556	0.0118146
ENSRNOG00000015514	Bcat1	0.750329	4.53172e-05	0.00123786
ENSRNOG00000015588	Nol3	-0.760361	2.02419e-06	8.68176e-05
ENSRNOG00000015636	Wdr34	-0.945421	7.19387e-06	0.000258837
ENSRNOG00000015787	P3h4	-0.66596	0.00116674	0.0181115
ENSRNOG00000015858	Hyal1	0.964575	2.54866e-09	1.7165e-07
ENSRNOG00000015880	Dpep1	0.807319	0.00247369	0.0325995
ENSRNOG00000015902	Cpxm2	-1.23169	7.18539e-17	1.06352e-14
ENSRNOG00000015956	Usp29	0.897627	0.000185437	0.0040627
ENSRNOG00000015957	F13a1	0.943823	7.74963e-11	6.94683e-09
ENSRNOG00000015972	Ano5	0.669254	3.50909e-05	0.00100151
ENSRNOG00000015999	Cirbp	-0.725559	8.07864e-06	0.000286443
ENSRNOG00000016043	Aqp4	1.02482	2.02631e-11	1.98407e-09
ENSRNOG00000016123	Rnf144b	-0.602715	3.22597e-05	0.000939666
ENSRNOG00000016143	Gpr162	1.30551	9.77581e-06	0.000333609
ENSRNOG00000016164	Fcrl2	1.31585	7.05574e-08	3.91193e-06
ENSRNOG00000016226	Rpp40	-0.613074	0.000424613	0.0079367
ENSRNOG00000016330	Rbm12b	0.696351	0.000552979	0.00985836
ENSRNOG00000016336	Rn50_20_0472.1	0.878571	0.00176411	0.025146
ENSRNOG00000016362	Gpr4	0.630428	0.00150289	0.0220395
ENSRNOG00000016367	Vasp	0.615741	3.14987e-05	0.000923842
ENSRNOG00000016408	Kirrel	0.709303	4.98296e-05	0.00134953
ENSRNOG00000016417	Zfp136	0.835368	0.00289384	0.0367256
ENSRNOG00000016451	Cd1d1	-3.06935	6.59806e-77	9.33185e-74
ENSRNOG00000016507	Snrpg	-0.677078	0.000490661	0.00887163
ENSRNOG00000016516	Mbp	1.03565	1.16771e-12	1.24905e-10
ENSRNOG00000016534	Fam171a1	0.641804	0.00142042	0.0210974
ENSRNOG00000016543	Trim63	-0.887002	4.48145e-07	2.19402e-05
ENSRNOG00000016545	Ift140	0.759416	3.38136e-06	0.00013473
ENSRNOG00000016558	Pllp	0.845087	0.00118708	0.0183601
ENSRNOG00000016576	Lrrc16a	0.612062	0.00427528	0.0489389
ENSRNOG00000016619	Use1	-0.621814	1.66235e-05	0.000529003
ENSRNOG00000016679	Tmc7	0.947963	0.000919375	0.0149869
ENSRNOG00000016692	Hsdl2	0.678288	3.4127e-05	0.000982811
ENSRNOG00000016794	Phyhd1	-0.945897	7.89836e-08	4.3523e-06
ENSRNOG00000016826	Pla2g2d	1.83626	4.06667e-22	9.41175e-20
ENSRNOG00000016827	Slc38a3	0.613796	0.000118147	0.00278498
ENSRNOG00000016838	Pla2g5	-1.18948	3.47315e-05	0.000995714
ENSRNOG00000016848	Fzd4	0.588269	0.000242583	0.00502087
ENSRNOG00000016854	Lrrc36	1.10528	4.45063e-05	0.00122095
ENSRNOG00000016866	Fhl2	-0.965197	1.28212e-06	5.78934e-05
ENSRNOG00000016873	Msrb2	-1.45178	7.28521e-14	8.74843e-12
ENSRNOG00000016891	Uimc1	-0.643862	8.99179e-06	0.000311871
ENSRNOG00000016905	Hmg20a	-0.654136	9.21717e-06	0.000318819
ENSRNOG00000016937	Mtfr1l	-0.886584	1.90798e-07	9.83269e-06
ENSRNOG00000016945	Pla2g2a	-2.01573	8.14992e-25	2.30534e-22
ENSRNOG00000016998	Atxn1	0.698895	6.887e-06	0.000250471
ENSRNOG00000017045	Zdhhc1	-0.609011	2.8761e-05	0.000851393
ENSRNOG00000017063	Fcna	0.661189	4.10469e-05	0.0011408
ENSRNOG00000017117	Ybx2	0.688705	0.0018841	0.0265296
ENSRNOG00000017188	Cyp27a1	-0.863579	2.99636e-09	1.9762e-07
ENSRNOG00000017248	Prkag3	-1.28544	1.15062e-14	1.43591e-12
ENSRNOG00000017283	Kcnt1	-1.26989	2.05577e-05	0.000636688
ENSRNOG00000017286	Ephx2	-3.73429	1.04862e-74	1.21344e-71
ENSRNOG00000017307	Prss23	0.716403	6.02795e-06	0.000221123
ENSRNOG00000017382	Snx33	-0.918556	3.67268e-08	2.16433e-06
ENSRNOG00000017392	Fgf2	0.896234	0.00135145	0.0203101
ENSRNOG00000017412	AABR07001512.1	4.1796	9.94707e-33	4.52201e-30
ENSRNOG00000017448	Exoc3l2	1.103	2.21861e-05	0.000678861
ENSRNOG00000017489	Gse1	0.745607	4.69175e-06	0.000179264
ENSRNOG00000017513	Fam73b	0.677633	1.82798e-05	0.000573112
ENSRNOG00000017528	Gpr157	0.785958	8.32132e-08	4.54601e-06
ENSRNOG00000017531	Akr1c3	1.10503	6.20983e-05	0.0016231
ENSRNOG00000017577	Bphl	-0.88861	4.02344e-06	0.000156142
ENSRNOG00000017637	Fbp2	1.10078	1.53013e-13	1.77064e-11
ENSRNOG00000017693	Slc2a5	0.931309	0.00040432	0.00760205
ENSRNOG00000017765	Net1	-0.665771	5.68512e-05	0.00149826
ENSRNOG00000017766	Car12	1.34974	7.91447e-18	1.29158e-15
ENSRNOG00000017808	Klf15	-0.836733	6.77924e-09	4.25088e-07
ENSRNOG00000017810	Uros	0.760885	0.000204757	0.00438042
ENSRNOG00000017819	Cd14	0.87213	2.02568e-06	8.68176e-05
ENSRNOG00000017887	Mutyh	1.07539	5.93918e-06	0.000218497
ENSRNOG00000017980	Itgal	-1.30184	7.23905e-06	0.000258837
ENSRNOG00000018045	AABR07007730.1	4.63668	3.25055e-31	1.42677e-28
ENSRNOG00000018076	Fmo5	-1.05364	0.000145711	0.00331799
ENSRNOG00000018107	Zfand5	-0.800022	2.28225e-06	9.61948e-05
ENSRNOG00000018170	Slc27a1	0.993845	3.55926e-10	2.90422e-08
ENSRNOG00000018237	Gstp1	-0.598701	3.48186e-05	0.000995969
ENSRNOG00000018254	Sncaip	-0.817795	0.000226658	0.00472199
ENSRNOG00000018282	Gda	0.732319	4.74731e-07	2.30643e-05
ENSRNOG00000018336	Eps8l2	-0.635222	0.00400875	0.0468141
ENSRNOG00000018369	Prx	0.623501	6.8923e-05	0.00176169
ENSRNOG00000018445	Agt	0.804366	1.34102e-06	6.01051e-05
ENSRNOG00000018487	Slc3a2	1.03649	2.83762e-10	2.39206e-08
ENSRNOG00000018494	Ppp1r3c	0.603108	0.00091584	0.014965
ENSRNOG00000018598	Ankrd1	-1.12488	1.21854e-13	1.43618e-11
ENSRNOG00000018603	Carns1	0.723205	2.17092e-06	9.21122e-05
ENSRNOG00000018616	Cdc42ep5	-0.943289	0.000934879	0.0151593
ENSRNOG00000018694	Lipg	-1.93134	2.9453e-17	4.57205e-15
ENSRNOG00000018859	Pik3ip1	-0.627372	1.36381e-05	0.000447422
ENSRNOG00000018911	Pfkfb3	-1.47662	5.10827e-19	9.42365e-17
ENSRNOG00000019009	Arrdc2	-0.626163	4.94704e-05	0.00134266
ENSRNOG00000019050	Ifit1	8.22988	2.65999e-173	8.46475e-170
ENSRNOG00000019065	Zfp385b	1.23217	3.30998e-11	3.12094e-09
ENSRNOG00000019141	Ch25h	1.08213	0.000114748	0.00272506
ENSRNOG00000019180	Acsl4	-0.608738	3.20557e-05	0.000935865
ENSRNOG00000019183	Alox15	2.13311	6.47378e-18	1.08427e-15
ENSRNOG00000019184	Npr3	1.36705	4.78449e-16	6.47891e-14
ENSRNOG00000019221	Gstm4	1.50268	7.92142e-24	2.05779e-21
ENSRNOG00000019265	Pcdh12	0.63111	0.000219611	0.00461341
ENSRNOG00000019310	Eid2	-0.866742	0.00107339	0.016889
ENSRNOG00000019339	Ttll11	-0.646324	0.00138876	0.0207483
ENSRNOG00000019351	Chid1	-0.767167	0.00135882	0.0203726
ENSRNOG00000019376	Zfp329	0.726924	0.000449989	0.00828931
ENSRNOG00000019536	Smim3	-0.70712	0.000620539	0.0107333
ENSRNOG00000019584	Dlk1	-1.88884	1.0708e-18	1.89308e-16
ENSRNOG00000019587	Ptprn	1.08715	9.46259e-05	0.00231968
ENSRNOG00000019612	Haghl	0.861018	0.00232826	0.0311634
ENSRNOG00000019721	Ypel3	-0.655941	5.7896e-06	0.000214857
ENSRNOG00000019822	Gadd45b	-1.08135	1.17915e-09	8.67592e-08
ENSRNOG00000019823	LOC100910944	-0.820608	0.000184257	0.0040438
ENSRNOG00000019868	Psma5	-0.71677	1.35041e-06	6.03138e-05
ENSRNOG00000019873	Eml3	-0.703688	0.000192554	0.00419696
ENSRNOG00000019990	RGD1566239	-0.707306	5.80491e-05	0.00152352
ENSRNOG00000020014	Myh14	-0.61316	2.81485e-05	0.000836586
ENSRNOG00000020164	Ifitm10	0.594836	0.000410109	0.00768819
ENSRNOG00000020242	Art5	-0.738994	6.58552e-07	3.09325e-05
ENSRNOG00000020251	Art1	-0.751979	9.30578e-06	0.000320765
ENSRNOG00000020263	Atp1a3	1.94374	4.80269e-13	5.50751e-11
ENSRNOG00000020277	Cntnap1	0.803389	0.00222772	0.0301346
ENSRNOG00000020315	Taf13	1.27049	7.58396e-18	1.25372e-15
ENSRNOG00000020342	Samd11	-1.06956	7.06845e-08	3.91193e-06
ENSRNOG00000020371	Pgap2	-0.594924	0.00284484	0.0362954
ENSRNOG00000020427	Borcs8	0.679198	0.000453008	0.00831359
ENSRNOG00000020607	Bckdha	-0.599303	0.000126928	0.00295719
ENSRNOG00000020622	Cilp2	-1.04901	1.52361e-10	1.32836e-08
ENSRNOG00000020644	Nsg2	-0.796763	0.000211424	0.00449284
ENSRNOG00000020656	Pfkfb4	-0.908068	4.24537e-08	2.47886e-06
ENSRNOG00000020659	Mrpl4	-0.59372	7.54278e-05	0.00190879
ENSRNOG00000020729	Stc2	-0.928934	3.59034e-06	0.000141825
ENSRNOG00000020811	Il6r	0.604314	3.46865e-05	0.000995714
ENSRNOG00000020821	Clip3	1.19602	4.63161e-06	0.000177578
ENSRNOG00000020830	Syne4	-1.07091	7.72116e-05	0.00194234
ENSRNOG00000020833	Cspg5	0.851129	0.00301284	0.0377465
ENSRNOG00000020847	Elp6	-0.619837	0.00239703	0.0318828
ENSRNOG00000020851	Aplp1	0.665642	0.00211635	0.0291233
ENSRNOG00000020929	Lin37	-0.678166	0.00172318	0.0246177
ENSRNOG00000020951	Slc4a1	1.52036	4.86602e-08	2.78604e-06
ENSRNOG00000020952	Cgn	1.91928	2.03008e-15	2.72009e-13
ENSRNOG00000020956	Bcat2	-0.806906	1.22462e-07	6.52225e-06
ENSRNOG00000020991	Ms4a6a	0.953232	6.24683e-06	0.000228494
ENSRNOG00000021015	Sbsn	-1.32766	2.78686e-06	0.000114792
ENSRNOG00000021027	Dbp	-1.82131	7.27061e-31	3.08492e-28
ENSRNOG00000021056	Kcnj14	0.906494	0.00149027	0.0218796
ENSRNOG00000021084	AABR07006310.1	0.740177	0.000676602	0.0116186
ENSRNOG00000021110	Mllt11	-0.710104	3.16976e-06	0.000127281
ENSRNOG00000021128	Kcnj11	0.597916	0.000343127	0.00672983
ENSRNOG00000021137	Kctd15	0.796941	8.16756e-07	3.80824e-05
ENSRNOG00000021147	Bad	2.758	1.84653e-29	7.34515e-27
ENSRNOG00000021156	Vegfb	-0.664132	8.6954e-06	0.000304076
ENSRNOG00000021183	Rcor2	0.77966	7.83137e-05	0.00196618
ENSRNOG00000021217	Itga10	-1.53746	6.55392e-10	5.14969e-08
ENSRNOG00000021261	Rassf2	0.786444	2.72542e-06	0.000113003
ENSRNOG00000021268	LOC681292	-1.22262	1.67053e-08	1.00778e-06
ENSRNOG00000021338	Tmem132a	-0.953567	2.00275e-10	1.71094e-08
ENSRNOG00000021611	Clip2	0.755826	0.000104013	0.00249808
ENSRNOG00000021812	Scx	-0.643288	6.40126e-05	0.00165613
ENSRNOG00000021824	Dnajb1	0.682573	1.57421e-05	0.000506014
ENSRNOG00000022009	Mzb1	1.04582	0.000592336	0.0104141
ENSRNOG00000022143	Dusp23	-0.980976	8.86483e-10	6.71669e-08
ENSRNOG00000022144	LOC100361993	1.22268	1.37864e-13	1.60997e-11
ENSRNOG00000022155	RGD1560289	-1.72719	1.58574e-10	1.37313e-08
ENSRNOG00000022189	Htatip2	-0.808845	0.000701718	0.0119574
ENSRNOG00000022242	Cxcl9	2.14378	3.81232e-46	3.03294e-43
ENSRNOG00000022309	Frem1	-0.696627	0.00139445	0.0207991
ENSRNOG00000022419	Dok7	0.589379	9.80865e-05	0.00237818
ENSRNOG00000022523	Fkbp5	0.734945	3.26336e-06	0.000130627
ENSRNOG00000022555	LOC497899	-0.852308	0.00190351	0.0267436
ENSRNOG00000022657	Tmem97	-0.689172	0.000330183	0.00652625
ENSRNOG00000022707	Pmp2	1.11363	2.52192e-06	0.000105597
ENSRNOG00000022762	Mettl21cl1	2.72255	4.62017e-28	1.54763e-25
ENSRNOG00000022771	Arhgap23	0.72	3.9583e-05	0.00110981
ENSRNOG00000023007	Col6a6	-1.00216	3.79528e-09	2.45229e-07
ENSRNOG00000023008	Fam131c	1.21995	4.92984e-07	2.368e-05
ENSRNOG00000023109	Icoslg	-0.68985	0.000161796	0.00363227
ENSRNOG00000023257	Adamts9	1.21262	3.70907e-16	5.18822e-14
ENSRNOG00000023274	Lrrc28	0.714767	3.18622e-05	0.000932352
ENSRNOG00000023410	Apol9a	0.911294	3.1738e-10	2.62333e-08
ENSRNOG00000023509	Irs2	1.03895	7.11651e-13	7.94615e-11
ENSRNOG00000023566	Vwa3b	0.660338	0.000363676	0.00701399
ENSRNOG00000023633	Crabp1	-2.2309	4.72658e-15	6.13924e-13
ENSRNOG00000023639	Rpusd1	0.936984	1.67207e-05	0.000529446
ENSRNOG00000023664	Leprot	0.661509	0.00115957	0.0180443
ENSRNOG00000023837	Mtx3	0.716278	0.000519121	0.00933317
ENSRNOG00000023943	Gbp1	-0.664809	4.2276e-05	0.00116731
ENSRNOG00000023991	Rab20	-1.19607	7.06547e-11	6.37846e-09
ENSRNOG00000023993	Kif1a	1.26542	1.8252e-06	7.90236e-05
ENSRNOG00000024115	C6	1.47403	3.95814e-16	5.47643e-14
ENSRNOG00000024243	Cadm4	1.08496	2.81951e-05	0.000836586
ENSRNOG00000024536	Ccbe1	-2.09339	1.87612e-12	1.94156e-10
ENSRNOG00000024602	Plekha7	1.15754	2.44223e-11	2.35509e-09
ENSRNOG00000024650	Ckap2	0.824041	0.00319521	0.0395115
ENSRNOG00000024799	Cd93	0.725395	1.57186e-06	6.94729e-05
ENSRNOG00000024824	Col22a1	-0.842196	1.07417e-07	5.78131e-06
ENSRNOG00000024924	Cep19	-0.669925	4.75372e-06	0.000180627
ENSRNOG00000024952	Atp8b1	0.717861	1.11728e-05	0.00037624
ENSRNOG00000024986	Mmrn1	-1.49419	1.20451e-20	2.55536e-18
ENSRNOG00000025075	Relt	-0.782979	2.74254e-06	0.000113344
ENSRNOG00000025140	Zfat	0.647341	0.000149278	0.00338106
ENSRNOG00000025371	Spry1	-0.598088	4.03302e-05	0.00112827
ENSRNOG00000025378	Ccdc155	0.998	0.000304615	0.0061352
ENSRNOG00000025473	Tppp2	1.21723	3.60997e-06	0.000141825
ENSRNOG00000025604	Atad2	0.659786	0.00062561	0.0108051
ENSRNOG00000025612	Sez6l	3.3602	2.36982e-23	5.91479e-21
ENSRNOG00000025716	Lsm10	-0.757016	4.89835e-05	0.00133229
ENSRNOG00000025811	Cfp	0.69002	0.000183421	0.0040324
ENSRNOG00000025832	Zer1	-0.591456	4.42141e-05	0.00121555
ENSRNOG00000026087	Igfn1	-1.29643	2.83737e-16	4.01299e-14
ENSRNOG00000026186	Syde2	0.978603	0.000141117	0.00323653
ENSRNOG00000026226	Hook1	-0.69493	0.000163741	0.00365934
ENSRNOG00000026238	RGD1562618	-0.653868	0.0012125	0.0186852
ENSRNOG00000026252	E2f7	0.930551	0.00197874	0.0275272
ENSRNOG00000026415	Col14a1	0.649694	3.60289e-05	0.00102369
ENSRNOG00000026420	Iqcg	0.758274	0.000361457	0.00698177
ENSRNOG00000026493	Cdnf	0.939165	1.7944e-09	1.255e-07
ENSRNOG00000026649	Dnmt3a	0.663514	5.12339e-06	0.000192946
ENSRNOG00000026704	Drp2	1.11764	4.55523e-09	2.92846e-07
ENSRNOG00000026958	LOC500077	0.886059	0.00229944	0.030875
ENSRNOG00000026982	LOC691921	0.651888	0.000321283	0.00638006
ENSRNOG00000027089	Ell2	0.811648	3.44891e-08	2.04191e-06
ENSRNOG00000027098	Sez6l2	1.025	0.000262328	0.00536844
ENSRNOG00000027271	RGD1359290	-3.09633	1.14363e-75	1.45572e-72
ENSRNOG00000027433	LOC100910708	1.81206	5.71412e-17	8.55707e-15
ENSRNOG00000027463	Adamts3	-1.03732	0.000291366	0.00589634
ENSRNOG00000027552	Tapbpl	-0.663941	0.000103437	0.00248895
ENSRNOG00000027630	Casc1	0.929151	0.000345498	0.00675552
ENSRNOG00000027722	H1fx	-0.995014	0.00019987	0.00431212
ENSRNOG00000027742	Adamtsl2	1.28988	1.89253e-10	1.6277e-08
ENSRNOG00000027797	Nit2	-1.03581	1.11274e-12	1.20035e-10
ENSRNOG00000027888	Cmss1	1.27121	5.07243e-15	6.52191e-13
ENSRNOG00000027894	Iqgap3	1.09924	0.000117876	0.00278376
ENSRNOG00000028137	Mki67	1.03644	1.16697e-06	5.32414e-05
ENSRNOG00000028261	Tppp	0.799343	9.47625e-05	0.00231968
ENSRNOG00000028319	Cryz	0.662653	0.00414843	0.0480049
ENSRNOG00000028344	Mmp11	1.55087	2.45318e-07	1.23915e-05
ENSRNOG00000028350	Arse	0.71017	0.000350954	0.00683072
ENSRNOG00000028690	LOC100362366	1.65287	2.23627e-16	3.19837e-14
ENSRNOG00000028708	Ntsr1	0.924719	0.000927487	0.0150587
ENSRNOG00000028768	Gbp4	-0.877959	0.00123187	0.0188921
ENSRNOG00000028872	Rai14	0.594827	0.000130605	0.00302818
ENSRNOG00000028993	LOC102555453	1.16532	2.49849e-14	3.02889e-12
ENSRNOG00000029079	Hspb7	-0.600014	0.000852857	0.0140987
ENSRNOG00000029087	Nap1l3	-0.790599	0.00265991	0.0344786
ENSRNOG00000029115	RGD1564883	2.69175	1.90033e-25	5.49755e-23
ENSRNOG00000029191	LOC685067	-0.625007	0.00399165	0.0467001
ENSRNOG00000029330	Car5b	-0.632303	0.00125125	0.0190922
ENSRNOG00000029386	RT1-N2	-2.72272	7.24247e-29	2.63398e-26
ENSRNOG00000029416	Zfp952	-0.711341	0.00133704	0.0201411
ENSRNOG00000029745	AABR07002677.1	0.700399	0.00310042	0.038598
ENSRNOG00000029871	Slc8a3	0.664835	8.78886e-06	0.000305665
ENSRNOG00000029886	Hba-a1	0.802834	9.32383e-06	0.000320765
ENSRNOG00000029954	AY172581.7	-1.15585	8.325e-15	1.0492e-12
ENSRNOG00000030389	Lrrc30	1.658	6.69969e-28	2.18668e-25
ENSRNOG00000030462	Ostn	-1.10821	1.0954e-12	1.19174e-10
ENSRNOG00000030478	AY172581.9	-6.73616	2.75063e-206	1.75064e-202
ENSRNOG00000030700	Mt-cox3	-1.15957	1.28135e-06	5.78934e-05
ENSRNOG00000030712	RT1-A2	-0.943196	1.79008e-09	1.255e-07
ENSRNOG00000030729	C4b	0.635307	9.51829e-05	0.00232475
ENSRNOG00000030910	Grik4	0.819305	0.00321303	0.0396305
ENSRNOG00000031090	RT1-CE7	1.5564	1.23192e-23	3.13622e-21
ENSRNOG00000031138	Irgm	-0.691779	2.98708e-05	0.000882194
ENSRNOG00000031335	Ankrd37	-0.829458	0.00325449	0.0399513
ENSRNOG00000031766	Mt-cyb	0.697779	0.00376488	0.044788
ENSRNOG00000031851	Ndufa4l2	-0.700559	0.00038002	0.00723061
ENSRNOG00000032133	Rnase2	2.89974	5.79949e-29	2.17123e-26
ENSRNOG00000032605	Rpl32	-1.20183	1.00184e-09	7.5014e-08
ENSRNOG00000032609	AY172581.18	-1.77235	2.36451e-22	5.57367e-20
ENSRNOG00000032798	Slco3a1	-0.994969	2.90339e-11	2.77874e-09
ENSRNOG00000032917	Zfand2a	-0.802689	8.20095e-07	3.80985e-05
ENSRNOG00000033110	Svep1	0.643819	8.5746e-06	0.000300678
ENSRNOG00000033220	Oas1f	0.588771	0.000318998	0.00635451
ENSRNOG00000033262	Reep6	-0.700915	0.00258736	0.033779
ENSRNOG00000033299	Mt-atp8	1.02416	3.25025e-10	2.66919e-08
ENSRNOG00000033517	LOC100360791	1.64676	2.53999e-26	7.88573e-24
ENSRNOG00000033529	Amy1a	5.31043	4.75232e-59	4.03282e-56
ENSRNOG00000033545	AY172581.21	1.00944	2.21817e-07	1.1294e-05
ENSRNOG00000033567	Musk	-0.694177	0.000378728	0.00722763
ENSRNOG00000033653	Mpp3	1.37084	4.94506e-20	1.01525e-17
ENSRNOG00000033722	Rnf207	1.19501	7.23475e-06	0.000258837
ENSRNOG00000033741	Ankrd34a	1.01119	0.00036633	0.00705448
ENSRNOG00000033748	AABR07060610.1	2.82716	2.00293e-37	1.15888e-34
ENSRNOG00000034221	Cfap126	0.82345	0.00142875	0.02116
ENSRNOG00000034228	Pik3c2g	0.701877	0.00351713	0.0424039
ENSRNOG00000034290	Ccl21	-1.66881	9.06858e-25	2.50943e-22
ENSRNOG00000036649	Pwwp2b	-0.706022	6.48901e-05	0.00166866
ENSRNOG00000036728	Cd300lb	0.860289	0.00120171	0.0185639
ENSRNOG00000036833	Zfp385a	0.870705	2.84442e-09	1.88576e-07
ENSRNOG00000036918	Etfbkmt	0.631524	0.00043556	0.00808184
ENSRNOG00000036964	Ralgapa2	0.690182	6.4617e-05	0.001665
ENSRNOG00000037206	Ccdc77	1.76522	5.37537e-24	1.42548e-21
ENSRNOG00000037406	RGD1564171	1.03961	0.000355022	0.00689934
ENSRNOG00000037505	Ulk1	-0.636432	1.53207e-05	0.000494967
ENSRNOG00000037645	Tceal7	0.964473	8.23934e-09	5.11603e-07
ENSRNOG00000037655	Gatb	-0.79902	1.27652e-07	6.77032e-06
ENSRNOG00000037853	Rarres1	0.78005	8.92679e-05	0.00221068
ENSRNOG00000038202	Calml4	0.751184	0.00387209	0.0457215
ENSRNOG00000038319	Akr1c19	0.715786	0.000610987	0.0106684
ENSRNOG00000038375	AABR07026311.1	-1.88845	1.34111e-12	1.42258e-10
ENSRNOG00000038999	RT1-A1	3.58399	1.97506e-100	4.1901e-97
ENSRNOG00000039455	LOC102552497	0.924789	0.000994048	0.015896
ENSRNOG00000039560	LOC103690116	-1.08369	2.98055e-08	1.77287e-06
ENSRNOG00000039890	Abcg3l3	0.915219	9.53351e-05	0.00232475
ENSRNOG00000039976	Ptk7	-0.870903	0.00136463	0.0204358
ENSRNOG00000040208	Mmp27	-0.730659	0.00436199	0.0495155
ENSRNOG00000040287	Cyp1b1	1.09028	1.84117e-07	9.5658e-06
ENSRNOG00000040297	Ttc37	-0.659977	4.86705e-06	0.000184383
ENSRNOG00000042044	Stard3	-0.768353	4.12753e-07	2.02855e-05
ENSRNOG00000042309	Soga3	-0.631644	1.24646e-05	0.000414261
ENSRNOG00000042317	Cd209f	1.73804	1.28131e-09	9.3199e-08
ENSRNOG00000042404	Ccdc122	1.03066	6.19194e-05	0.00162175
ENSRNOG00000042496	Cyp4f5	0.68288	0.00356234	0.0427784
ENSRNOG00000042536	Pde4d	0.730803	1.82425e-06	7.90236e-05
ENSRNOG00000042630	Asb5	-0.60757	0.000202257	0.00434887
ENSRNOG00000042717	Ciart	-2.15029	1.66084e-25	4.91649e-23
ENSRNOG00000042825	Cd300le	-0.790877	0.000544532	0.00972138
ENSRNOG00000042838	Junb	-0.856744	4.33652e-08	2.52053e-06
ENSRNOG00000042897	Nmrk2	0.807052	1.07156e-07	5.78131e-06
ENSRNOG00000042927	Sbk3	-0.919406	0.000720665	0.0121759
ENSRNOG00000042975	Tmem45al	-0.760277	0.0037225	0.0443668
ENSRNOG00000043068	Tipin	-0.713893	0.00331877	0.0406198
ENSRNOG00000043171	Hdhd2	0.636448	5.06203e-05	0.00136804
ENSRNOG00000043219	Fbn2	-1.08458	1.10117e-05	0.000372787
ENSRNOG00000043366	AABR07063829.1	-0.801657	0.00108788	0.0170662
ENSRNOG00000043426	Kyat3	-0.799778	0.000143004	0.00326805
ENSRNOG00000043451	Spp1	1.14249	2.3018e-09	1.56683e-07
ENSRNOG00000043465	Arc	0.756541	0.00197499	0.0275272
ENSRNOG00000045560	LOC499229	1.78224	6.18897e-20	1.25047e-17
ENSRNOG00000045636	Fasn	0.767781	2.51432e-07	1.25509e-05
ENSRNOG00000045653	Fam131a	0.599556	0.000381331	0.00724472
ENSRNOG00000045654	Hspa1a	1.46626	3.83115e-19	7.27861e-17
ENSRNOG00000045729	AC117058.1	-0.668278	0.000996226	0.0159109
ENSRNOG00000045797	Lep	1.1894	5.99038e-11	5.48572e-09
ENSRNOG00000045840	LOC102551184	-0.795246	0.000261367	0.0053574
ENSRNOG00000045885	LOC100365810	1.72231	5.23217e-23	1.25661e-20
ENSRNOG00000045967	AABR07064061.1	-2.00238	1.10687e-36	6.12581e-34
ENSRNOG00000045989	Hba-a3	8.4224	9.81247e-141	2.49806e-137
ENSRNOG00000046053	Nudt10	-0.805218	0.00366901	0.0438113
ENSRNOG00000046068	AABR07027088.1	-0.816482	0.00421648	0.0485516
ENSRNOG00000046081	AABR07015079.1	-0.664576	0.000585288	0.0103331
ENSRNOG00000046143	Pgap3	0.943289	3.78443e-06	0.000147315
ENSRNOG00000046155	LOC498675	-1.68132	5.56837e-09	3.54399e-07
ENSRNOG00000046177	LOC100912498	0.593483	0.000438549	0.00810203
ENSRNOG00000046204	Tspan15	-0.679316	0.00223996	0.030268
ENSRNOG00000046276	Myh3	0.630874	2.24171e-05	0.000684286
ENSRNOG00000046280	Tceal5	0.977717	2.48944e-09	1.68553e-07
ENSRNOG00000046428	Lrrc75b	-0.842682	0.00416391	0.0481172
ENSRNOG00000046493	Pnpo	0.771038	1.19465e-05	0.000399125
ENSRNOG00000046600	AABR07015066.1	-0.765864	2.59738e-06	0.0001084
ENSRNOG00000046658	Omd	-1.1291	4.74332e-08	2.73202e-06
ENSRNOG00000046675	Gpbp1l2	0.887686	0.0017106	0.0245202
ENSRNOG00000046700	Wbscr27	1.29369	5.86552e-06	0.000216412
ENSRNOG00000046858	Arxes2	0.865496	0.00161428	0.02343
ENSRNOG00000046871	LOC681367	-1.3574	4.00099e-08	2.34694e-06
ENSRNOG00000046912	Nr1d2	-0.686815	2.29313e-05	0.000698306
ENSRNOG00000047045	LOC100912030	-0.689254	7.21037e-06	0.000258837
ENSRNOG00000047158	Selenbp1	-0.849443	2.11438e-06	9.00132e-05
ENSRNOG00000047236	AABR07008066.2	0.649395	0.00169506	0.0243526
ENSRNOG00000047307	Cntfr	0.589862	5.63706e-05	0.00148868
ENSRNOG00000047321	Hba-a2	1.01823	5.04887e-09	3.2295e-07
ENSRNOG00000047364	Cox7a1	0.928183	0.00108868	0.0170662
ENSRNOG00000047387	LOC100912445	0.629032	0.000605506	0.0106164
ENSRNOG00000047455	Cdhr3	1.72844	4.20546e-10	3.40963e-08
ENSRNOG00000047505	Tubb4a	1.27437	1.58518e-06	6.98192e-05
ENSRNOG00000047537	LOC100912373	-1.03107	0.000296799	0.00598726
ENSRNOG00000047656	Gaa	-0.784973	1.28258e-06	5.78934e-05
ENSRNOG00000047706	RT1-CE16	6.56925	5.88223e-186	2.49583e-182
ENSRNOG00000047708	Gstz1	-0.621658	0.000723543	0.0121987
ENSRNOG00000047860	Plin5	0.596733	0.000482819	0.00875471
ENSRNOG00000047876	LOC689986	-1.01879	0.000333499	0.00656123
ENSRNOG00000047898	Hist2h2aa2	-0.639349	0.000430823	0.00802921
ENSRNOG00000047957	Traf5	0.778129	0.000437291	0.00809052
ENSRNOG00000048039	LOC679149	-0.821413	0.00143886	0.0212474
ENSRNOG00000048130	LOC100911725	-0.984974	3.42833e-06	0.000135948
ENSRNOG00000048174	Uqcrq	-0.706236	1.77096e-05	0.000556605
ENSRNOG00000048273	Apod	1.07595	6.5764e-12	6.69688e-10
ENSRNOG00000048365	LOC100911625	0.976784	6.51218e-05	0.00167124
ENSRNOG00000048472	Comp	-1.06809	1.13862e-05	0.000382415
ENSRNOG00000048771	RGD1559482	-1.65439	1.26494e-10	1.11816e-08
ENSRNOG00000048915	Twf2	-0.66293	2.4668e-05	0.000745842
ENSRNOG00000048935	Tmem45a	-0.867964	0.00177963	0.0252822
ENSRNOG00000048951	LOC100364500	-1.00367	0.00020325	0.00436284
ENSRNOG00000048961	Bhlhe41	-1.2218	7.36193e-15	9.37101e-13
ENSRNOG00000049020	LOC102548415	0.784872	0.00320206	0.0395335
ENSRNOG00000049033	Racgap1	0.991677	0.000508462	0.00915447
ENSRNOG00000049056	Ak1	2.01293	1.16051e-29	4.76521e-27
ENSRNOG00000049075	Fabp5	-0.812916	5.54424e-06	0.000206958
ENSRNOG00000049123	AABR07066510.1	-0.759398	0.00406096	0.0470783
ENSRNOG00000049422	LOC103693683	0.962698	3.94189e-05	0.00110765
ENSRNOG00000049743	Gstm5	-0.7116	7.61889e-06	0.000270896
ENSRNOG00000049873	Ap1s3	1.51448	3.59588e-07	1.77411e-05
ENSRNOG00000050015	LOC687508	1.06268	0.0001108	0.0026362
ENSRNOG00000050104	LOC100911911	1.30885	6.52063e-09	4.12941e-07
ENSRNOG00000050148	AABR07002973.1	-0.630093	0.000208173	0.00443857
ENSRNOG00000050181	LOC100911881	-0.753482	0.00161931	0.0234763
ENSRNOG00000050183	RT1-CE1	0.95179	2.17924e-06	9.21577e-05
ENSRNOG00000050210	RT1-CE10	-2.14082	7.76958e-17	1.13677e-14
ENSRNOG00000050215	Rn60_20_0038.1	-1.00844	0.000311161	0.00624727
ENSRNOG00000050381	Dus3l	-0.585391	0.000222127	0.00465041
ENSRNOG00000050416	Kcna10	3.05476	9.82553e-21	2.11982e-18
ENSRNOG00000050419	Avil	-1.18599	3.34841e-05	0.000967469
ENSRNOG00000050647	Hspa1b	1.49143	1.56244e-19	3.10754e-17
ENSRNOG00000051699	Zdhhc4	1.93411	2.32863e-34	1.18564e-31
ENSRNOG00000051943	LOC102547817	0.920883	9.28834e-05	0.00229
ENSRNOG00000051952	Tes	0.68771	0.00148699	0.0218567
ENSRNOG00000052141	Rps10l1	-0.874151	5.24604e-06	0.000196982
ENSRNOG00000052173	Ranbp3l	1.79578	2.49159e-17	3.96443e-15
ENSRNOG00000052389	AABR07031489.1	1.16107	1.8771e-09	1.30566e-07
ENSRNOG00000052415	Gstt2	-0.600794	0.00132719	0.0200401
ENSRNOG00000052745	Met	-0.996897	1.34716e-11	1.35024e-09
ENSRNOG00000052873	Npnt	-0.90026	5.29048e-05	0.00141476
ENSRNOG00000052998	AABR07048791.1	-0.727077	0.000193189	0.00420359
ENSRNOG00000053014	AABR07029831.1	-0.892896	0.00132493	0.0200298
ENSRNOG00000053047	Top2a	1.06935	1.46309e-06	6.4891e-05
ENSRNOG00000053122	Scn1a	-0.704765	0.000452286	0.00831359
ENSRNOG00000053260	Lilrb3l	1.75862	2.88851e-17	4.53924e-15
ENSRNOG00000053362	Gabarapl1	-0.919244	2.15506e-09	1.4828e-07
ENSRNOG00000053430	Slco4a1	1.74979	6.27719e-11	5.70731e-09
ENSRNOG00000053438	AABR07061822.1	-2.80608	3.09658e-18	5.32654e-16
ENSRNOG00000053494	Mcpt1l1	0.646081	3.57591e-05	0.00101829
ENSRNOG00000053679	AABR07060862.1	1.3845	2.24652e-07	1.13928e-05
ENSRNOG00000053812	Selenbp1	-0.849861	2.06516e-06	8.82127e-05
ENSRNOG00000053848	LOC102552344	-2.22582	3.65507e-17	5.60547e-15
ENSRNOG00000053869	Ppp1r3d	-0.621162	0.000785666	0.0131071
ENSRNOG00000053968	AABR07019086.1	0.592024	0.00285298	0.036352
ENSRNOG00000054204	Gria2	0.769399	0.00425506	0.0488392
ENSRNOG00000054371	Prkcg	0.836568	0.0035162	0.0424039
ENSRNOG00000054420	Vdr	-0.751321	0.00347433	0.0421188
ENSRNOG00000054474	Mastl	0.889151	0.00172587	0.0246285
ENSRNOG00000054945	LOC257642	-0.890661	7.71326e-10	5.96848e-08
ENSRNOG00000055229	Lnpep	0.607846	0.000952897	0.0153328
ENSRNOG00000055292	LOC679087	0.713623	0.000359062	0.00694861
ENSRNOG00000055317	AABR07028908.2	-1.34327	2.79563e-06	0.000114792
ENSRNOG00000055323	AABR07063421.1	-0.679624	0.00109833	0.0171964
ENSRNOG00000055401	Kcnc1	0.754845	4.99114e-06	0.000188523
ENSRNOG00000055769	AABR07054286.1	-2.79022	4.74387e-19	8.88012e-17
ENSRNOG00000055836	AABR07000402.1	-0.708344	0.000172841	0.00385304
ENSRNOG00000055956	AABR07015078.1	-0.787593	1.97065e-07	1.01147e-05
ENSRNOG00000056069	Kif11	1.11815	3.2376e-05	0.0009409
ENSRNOG00000056151	Rasgrf2	-0.728533	0.00366706	0.0438113
ENSRNOG00000056400	Hhipl2	-3.35688	5.04987e-29	1.94787e-26
ENSRNOG00000056435	LOC102546764	0.920706	0.000752851	0.0126527
ENSRNOG00000056656	AABR07044049.1	0.992868	3.01746e-05	0.000887813
ENSRNOG00000056697	Kcnab1	-0.626983	0.00290238	0.0367972
ENSRNOG00000056768	AABR07035428.1	-0.607814	0.00166635	0.0239943
ENSRNOG00000056894	St6galnac3	-1.05886	9.30104e-05	0.00229
ENSRNOG00000056940	Cited2	-1.29587	1.15503e-17	1.86106e-15
ENSRNOG00000057009	Ptp4a1	-0.951463	2.23311e-09	1.52824e-07
ENSRNOG00000057133	AABR07034455.2	1.1411	1.67168e-05	0.000529446
ENSRNOG00000057352	LOC100909912	-0.635028	0.00123032	0.0188911
ENSRNOG00000057404	Slc47a1	-4.08926	4.44108e-60	4.0379e-57
ENSRNOG00000057514	AABR07015080.1	-0.652308	0.000218708	0.00460916
ENSRNOG00000057659	AABR07067080.1	0.907395	0.00140826	0.0209658
ENSRNOG00000057811	AABR07015055.2	-0.76363	4.47088e-05	0.00122387
ENSRNOG00000057851	LOC680254	-1.04486	3.35182e-05	0.000967469
ENSRNOG00000057867	Mns1	1.72634	2.96143e-10	2.48e-08
ENSRNOG00000058105	Hbb	1.56991	6.36881e-19	1.15812e-16
ENSRNOG00000058222	AABR07013802.1	1.12775	1.2203e-09	8.92714e-08
ENSRNOG00000058422	Pirb	1.42231	3.0874e-09	2.02575e-07
ENSRNOG00000058436	Zfp52	2.14771	7.278e-13	8.0558e-11
ENSRNOG00000058522	Fam214a	-0.660331	6.30323e-06	0.000229896
ENSRNOG00000058566	LOC103694381	1.15602	3.16451e-10	2.62333e-08
ENSRNOG00000058645	Tnc	-1.05578	8.41368e-13	9.23256e-11
ENSRNOG00000058891	Cys1	0.706101	0.000387948	0.00735772
ENSRNOG00000059013	AABR07060519.1	-0.790402	0.0034594	0.0419778
ENSRNOG00000059041	AC141169.6	0.86259	0.00187702	0.0264884
ENSRNOG00000059504	AABR07015078.2	-0.935101	0.000220531	0.00462461
ENSRNOG00000059702	Tex9	0.755314	2.582e-05	0.000778823
ENSRNOG00000059714	Hsp90aa1	0.805832	8.28706e-07	3.83585e-05
ENSRNOG00000059956	Bcl6b	1.17267	5.86109e-11	5.40622e-09
ENSRNOG00000059957	AABR07021734.2	-3.94643	9.49433e-29	3.35704e-26
ENSRNOG00000059984	Dll1	0.721978	0.000565312	0.0100361
ENSRNOG00000060248	Chchd6	-1.08348	1.27219e-05	0.000420615
ENSRNOG00000060329	Emb	-1.2026	2.10499e-07	1.07608e-05
ENSRNOG00000060518	LOC257642	-0.791728	6.55333e-08	3.69103e-06
ENSRNOG00000060528	Cacna1g	-0.884633	3.25937e-05	0.000945069
ENSRNOG00000060587	AABR07002627.1	-0.816561	3.58525e-07	1.77411e-05
ENSRNOG00000060657	AABR07000404.1	-0.704422	3.8664e-05	0.00109125
ENSRNOG00000060690	AABR07052523.2	1.03739	0.000206759	0.00441582
ENSRNOG00000060896	AABR07063424.1	-0.752701	3.38704e-06	0.00013473
ENSRNOG00000060982	AABR07040332.1	-5.58577	9.77282e-38	5.92372e-35
ENSRNOG00000061005	AABR07016572.1	1.68545	5.92969e-18	1.00639e-15
ENSRNOG00000061118	AABR07012047.1	0.747611	0.000555302	0.00988593
ENSRNOG00000061215	Crym	2.12888	3.8663e-21	8.4852e-19
ENSRNOG00000061272	AABR07011996.1	-0.866169	2.73717e-05	0.000821732
ENSRNOG00000061579	Rpl12-ps1	5.13958	1.42833e-60	1.39856e-57
ENSRNOG00000061610	AABR07044148.1	0.877743	0.00232359	0.0311337
ENSRNOG00000061768	Slc43a3	0.728591	4.70377e-06	0.000179264
ENSRNOG00000061857	Mgst2	-0.813754	0.00296485	0.0374772
ENSRNOG00000061895	LOC103690111	2.60844	1.89059e-18	3.29662e-16
ENSRNOG00000061943	Rn60_7_1214.2	-6.50393	4.88996e-40	3.27602e-37
ENSRNOG00000062084	Rn60_13_0064.1	0.894157	0.00263556	0.0343027
ENSRNOG00000062125	Aox3	1.07308	8.72671e-07	4.02472e-05

## Sheet: DEGs in  EGK vs. GK
Differentially expressed genes in exercise GK vs. GK
Ensembl ID	Gene	logFC	PValue	FDR
ENSRNOG00000000187	Csf2rb	0.739938	0.000271009	0.013067
ENSRNOG00000000257	Smpd3	-0.957746	9.04119e-09	1.57651e-06
ENSRNOG00000000463	Col11a2	0.704358	1.88648e-05	0.00135667
ENSRNOG00000000529	Pim1	0.976329	7.81254e-06	0.000662972
ENSRNOG00000000605	Hs3st5	-1.17686	9.54198e-06	0.000773629
ENSRNOG00000000827	Ier3	-0.596124	0.0010295	0.0390017
ENSRNOG00000001030	Tsc22d1	0.714015	3.67807e-05	0.00240093
ENSRNOG00000001130	Nos1	1.34594	1.05071e-19	7.43026e-17
ENSRNOG00000001193	Hsf2bp	2.78547	8.22389e-21	8.05245e-18
ENSRNOG00000001528	Gap43	-1.03805	1.79708e-06	0.00018905
ENSRNOG00000001582	Bach1	0.605512	0.000142048	0.0075654
ENSRNOG00000001704	Runx1	1.33255	8.68058e-11	2.08481e-08
ENSRNOG00000001720	Hes1	0.692827	3.58905e-05	0.00237109
ENSRNOG00000001736	Bdh1	1.28258	1.95042e-07	2.55948e-05
ENSRNOG00000001843	Bcl6	0.781279	2.14421e-06	0.00022011
ENSRNOG00000001892	Tbx1	-0.833742	1.92555e-07	2.55316e-05
ENSRNOG00000001924	Tp63	-0.880481	3.93938e-06	0.000374211
ENSRNOG00000001979	Rcan1	1.43149	3.75637e-18	2.1734e-15
ENSRNOG00000002053	Fras1	0.629012	8.38978e-05	0.00496714
ENSRNOG00000002159	Gpat3	0.76929	1.70889e-06	0.000181271
ENSRNOG00000002163	Klf3	-0.635469	1.2e-05	0.000931391
ENSRNOG00000002180	Tbc1d1	0.839064	4.32643e-08	6.25809e-06
ENSRNOG00000002208	Shroom3	0.782428	0.00142888	0.0493444
ENSRNOG00000002305	Slc15a2	-1.02922	9.77979e-06	0.000787892
ENSRNOG00000002331	Aldh3a1	1.01096	7.35795e-05	0.00445997
ENSRNOG00000002343	Uchl1	-1.40647	2.04031e-07	2.65012e-05
ENSRNOG00000002419	Plp1	-1.04289	1.4912e-10	3.51508e-08
ENSRNOG00000002593	Esrrg	1.50384	1.06635e-24	1.13113e-21
ENSRNOG00000002667	Lamc2	1.72255	4.15085e-15	1.70439e-12
ENSRNOG00000002723	Sele	1.22696	1.33357e-05	0.00100189
ENSRNOG00000002794	Selp	1.25547	3.61346e-08	5.34834e-06
ENSRNOG00000002852	Myo19	0.592402	0.00107286	0.039931
ENSRNOG00000002917	Sec14l5	-1.5064	4.1902e-20	3.33357e-17
ENSRNOG00000002946	Socs3	0.863218	0.00110066	0.0408462
ENSRNOG00000003134	Slc4a4	1.44794	8.83421e-18	4.88916e-15
ENSRNOG00000003171	Mpz	0.642876	8.74797e-05	0.00515523
ENSRNOG00000003183	Fmod	0.986684	8.12528e-10	1.66817e-07
ENSRNOG00000003205	Ldb2	-0.944877	9.28644e-07	0.00010369
ENSRNOG00000003237	Tp53bp2	0.736021	8.07042e-07	9.091e-05
ENSRNOG00000003304	Chad	1.64092	4.15219e-20	3.33357e-17
ENSRNOG00000003463	Srebf1	-0.721518	9.52115e-06	0.000773629
ENSRNOG00000003496	Tbc1d9	-0.918304	3.32695e-05	0.00222888
ENSRNOG00000003546	Tnfrsf12a	1.00693	4.0693e-12	1.32816e-09
ENSRNOG00000003745	Atf3	1.83267	2.20385e-35	5.61055e-32
ENSRNOG00000003772	Csrp2	0.768807	3.29456e-06	0.000322588
ENSRNOG00000003984	Apln	-0.754222	0.000673569	0.0282966
ENSRNOG00000004033	Sema6a	0.637909	0.000284478	0.0136646
ENSRNOG00000004377	Lpin1	0.982332	4.6982e-09	8.66715e-07
ENSRNOG00000004473	Ppargc1a	1.63695	2.8761e-28	3.32817e-25
ENSRNOG00000004645	Galnt5	-0.601313	0.000424395	0.0194321
ENSRNOG00000004659	Creld2	0.972903	5.02639e-07	5.86981e-05
ENSRNOG00000004699	Fibin	1.00418	3.08032e-08	4.74713e-06
ENSRNOG00000004878	Myf6	1.23557	3.32543e-13	1.20941e-10
ENSRNOG00000004882	Capn6	-0.714042	0.000231073	0.0113565
ENSRNOG00000005176	Map7d2	1.1618	2.97291e-10	6.63898e-08
ENSRNOG00000005291	Slc38a1	0.944695	4.12174e-07	5.04477e-05
ENSRNOG00000005574	Adamts8	-1.15387	6.12354e-12	1.90114e-09
ENSRNOG00000005615	Gadd45a	0.598342	3.59511e-05	0.00237109
ENSRNOG00000005669	Car8	-0.936233	0.000203172	0.0103035
ENSRNOG00000005883	Nek10	1.56434	3.93896e-09	7.39185e-07
ENSRNOG00000005964	Nr4a3	1.30816	4.52185e-19	3.0294e-16
ENSRNOG00000006030	Ptprz1	-0.93202	0.000696547	0.0286011
ENSRNOG00000006116	Hk2	0.726392	8.43963e-06	0.000701219
ENSRNOG00000006583	Hpgds	-0.991408	0.000513509	0.0225917
ENSRNOG00000006588	Meox2	0.663691	1.34126e-05	0.00100189
ENSRNOG00000006689	Chd7	1.31927	2.99526e-18	1.81556e-15
ENSRNOG00000006802	Lrrn1	-0.890648	0.000542247	0.0237191
ENSRNOG00000006956	Adamtsl1	-0.678823	8.90074e-05	0.00522108
ENSRNOG00000006972	Zfp189	0.585808	0.000650283	0.0274998
ENSRNOG00000007059	Atp1b4	-0.947382	3.94882e-09	7.39185e-07
ENSRNOG00000007077	Fem1b	0.593706	6.7639e-05	0.00415931
ENSRNOG00000007219	LOC103692716	0.888349	3.53314e-08	5.29098e-06
ENSRNOG00000007281	Flnc	0.771351	0.000116821	0.00646527
ENSRNOG00000007478	Cry2	0.589584	6.12461e-05	0.00380294
ENSRNOG00000007545	Angptl4	1.18467	9.15945e-12	2.71141e-09
ENSRNOG00000007561	Glb1l2	-0.79783	0.00043534	0.0198618
ENSRNOG00000007625	B3galt1	-1.04487	0.000182276	0.00931804
ENSRNOG00000007808	Nap1l5	-1.75888	7.8299e-11	1.91667e-08
ENSRNOG00000007918	Tbxas1	-0.852631	0.00121388	0.0435253
ENSRNOG00000007999	Abra	0.862647	1.15064e-06	0.000125184
ENSRNOG00000008190	Pnpla7	1.02819	3.0618e-11	8.29225e-09
ENSRNOG00000008210	Ky	-0.651983	0.000110134	0.00617575
ENSRNOG00000008834	Dach1	-1.099	5.41768e-06	0.000495187
ENSRNOG00000009005	Slco2a1	0.942152	1.04716e-06	0.000115907
ENSRNOG00000009045	Alg6	-0.844572	0.000844499	0.0335926
ENSRNOG00000009047	Sln	0.834464	4.07255e-05	0.00263144
ENSRNOG00000009085	Prkag2	0.65607	0.000206518	0.0103904
ENSRNOG00000009131	Zc3h12a	0.751401	1.95604e-05	0.00139879
ENSRNOG00000009153	Cidec	0.596842	0.000163283	0.00855694
ENSRNOG00000009311	Fstl3	0.821179	0.00139289	0.0485757
ENSRNOG00000009565	Pdk4	1.18808	5.04264e-11	1.30995e-08
ENSRNOG00000009589	LOC102552055	1.80133	2.39774e-33	5.0868e-30
ENSRNOG00000010047	Ddit4l	-0.597105	3.66911e-05	0.00240093
ENSRNOG00000010134	Acot2	0.65506	6.30916e-06	0.000553857
ENSRNOG00000010478	LOC299282	0.829669	3.09538e-08	4.74713e-06
ENSRNOG00000010488	Zmiz1	1.33376	1.63054e-16	7.41257e-14
ENSRNOG00000010489	Samd4a	0.65702	2.99536e-05	0.00203893
ENSRNOG00000010681	Pitx2	-0.698928	7.80935e-05	0.00466691
ENSRNOG00000010725	Cpa1	-1.15581	2.23208e-07	2.86991e-05
ENSRNOG00000010731	Gpm6a	-1.20143	2.04113e-06	0.000211232
ENSRNOG00000010799	Noct	1.0937	1.48299e-13	5.55207e-11
ENSRNOG00000010889	Fbxw7	-0.706373	2.60832e-05	0.00181428
ENSRNOG00000010997	Ednrb	0.774066	3.28114e-05	0.00220982
ENSRNOG00000011094	Efcab6	0.793862	0.000639868	0.0273733
ENSRNOG00000011145	Crhr2	-0.693711	9.41244e-05	0.00549592
ENSRNOG00000011160	Sv2b	-0.859461	0.000351145	0.0164328
ENSRNOG00000011521	Filip1	0.762988	1.934e-06	0.000201786
ENSRNOG00000011704	Fbxo34	0.839153	8.61134e-09	1.52241e-06
ENSRNOG00000011705	Stmn2	-0.998937	0.000119692	0.00659548
ENSRNOG00000011841	Map2	-1.44019	1.30513e-08	2.24499e-06
ENSRNOG00000011901	Rrad	1.05803	9.89539e-12	2.83832e-09
ENSRNOG00000012184	Urgcp	0.664383	1.56672e-05	0.00115276
ENSRNOG00000012436	Adh6	0.987577	0.000268568	0.0130481
ENSRNOG00000012439	Bid	0.677654	0.00121387	0.0435253
ENSRNOG00000012591	Pkd2l1	-0.972895	0.000561289	0.024468
ENSRNOG00000012653	Ppp1r13b	0.601831	9.98463e-05	0.00573804
ENSRNOG00000012886	Maff	1.28322	3.18806e-12	1.06791e-09
ENSRNOG00000012892	Abca4	-1.02808	0.000364678	0.0170036
ENSRNOG00000013011	Dnajb4	0.691079	1.30138e-05	0.000989965
ENSRNOG00000013179	Tinagl1	0.668387	1.05004e-05	0.000840628
ENSRNOG00000013240	Ptger4	1.00434	0.000134577	0.00732067
ENSRNOG00000013364	Hey2	0.921143	0.00131517	0.0466318
ENSRNOG00000013391	Sorbs2	0.618122	1.96995e-05	0.00140087
ENSRNOG00000013397	Foxo1	0.817167	1.95691e-08	3.235e-06
ENSRNOG00000013552	Scd	-0.91671	4.27094e-10	9.21438e-08
ENSRNOG00000014117	Hmox1	0.877901	5.04388e-08	7.21389e-06
ENSRNOG00000014327	Csrp3	0.883042	2.57677e-07	3.21566e-05
ENSRNOG00000014338	Slc25a25	0.699532	1.80418e-05	0.00130485
ENSRNOG00000014426	Lox	0.60572	2.62804e-05	0.00181806
ENSRNOG00000014751	Ret	-0.699073	0.000172685	0.00893809
ENSRNOG00000014816	Slc1a1	-0.759885	0.00139701	0.0485861
ENSRNOG00000014900	Crem	1.70014	2.63537e-30	3.35456e-27
ENSRNOG00000015055	Scg2	-2.2721	8.474e-16	3.7195e-13
ENSRNOG00000015195	Hdhd3	0.680122	0.00128124	0.0455556
ENSRNOG00000015264	Lrrc38	-0.687672	0.000391161	0.0181058
ENSRNOG00000015434	Midn	0.863839	4.26001e-08	6.23283e-06
ENSRNOG00000015658	Sorbs1	0.851968	1.40994e-08	2.39295e-06
ENSRNOG00000015691	Fam212b	-0.606226	4.16913e-05	0.00268024
ENSRNOG00000015718	RGD1307461	-1.27439	1.49859e-17	7.85761e-15
ENSRNOG00000015902	Cpxm2	0.653507	8.50779e-06	0.000701219
ENSRNOG00000016037	Mafb	-0.722821	2.37438e-06	0.00023798
ENSRNOG00000016043	Aqp4	-1.07931	1.76148e-12	6.05996e-10
ENSRNOG00000016244	Mical2	1.52032	4.71386e-20	3.52957e-17
ENSRNOG00000016627	Eya4	0.73077	5.85243e-06	0.000528338
ENSRNOG00000016838	Pla2g5	1.33304	3.55256e-06	0.00034258
ENSRNOG00000016945	Pla2g2a	0.937793	1.39827e-06	0.000150836
ENSRNOG00000016949	Slc25a33	0.727466	5.99675e-06	0.000535586
ENSRNOG00000016962	Neu2	-1.05988	2.74646e-10	6.24281e-08
ENSRNOG00000017063	Fcna	-0.735323	5.44632e-06	0.000495187
ENSRNOG00000017065	Arhgap28	0.996349	6.56192e-09	1.19324e-06
ENSRNOG00000017120	Abhd2	0.935151	4.18222e-07	5.07004e-05
ENSRNOG00000017484	Gja5	0.665895	0.000163354	0.00855694
ENSRNOG00000017528	Gpr157	0.647944	8.53869e-06	0.000701219
ENSRNOG00000017601	Srd5a1	0.917774	0.000265704	0.0129584
ENSRNOG00000017689	Itih3	-1.33347	4.66275e-07	5.59926e-05
ENSRNOG00000017716	Ucp3	1.38187	2.43902e-15	1.03488e-12
ENSRNOG00000017766	Car12	2.70162	7.80232e-68	4.96579e-64
ENSRNOG00000017933	Ccdc3	1.03285	3.46925e-05	0.00231205
ENSRNOG00000018143	Hpdl	0.830505	0.000153887	0.00812792
ENSRNOG00000018198	Dapk1	1.11307	5.5558e-14	2.20999e-11
ENSRNOG00000018294	Hspa5	0.660767	0.000100723	0.00573804
ENSRNOG00000018336	Eps8l2	0.819819	0.000203986	0.0103037
ENSRNOG00000018598	Ankrd1	2.28256	3.09915e-48	9.86226e-45
ENSRNOG00000018646	Hbegf	0.897971	6.49949e-10	1.35626e-07
ENSRNOG00000018895	Mchr1	-0.965082	0.000934391	0.0361222
ENSRNOG00000019065	Zfp385b	0.710603	7.735e-05	0.00464428
ENSRNOG00000019138	Clec11a	0.585325	0.000208927	0.0104702
ENSRNOG00000019179	Ggta1	0.750775	3.21708e-06	0.000317444
ENSRNOG00000019202	PVR	0.78202	7.34947e-07	8.42805e-05
ENSRNOG00000019217	Adrb2	-0.614695	0.000682656	0.0285275
ENSRNOG00000019390	Klhl40	1.07795	6.12167e-11	1.5279e-08
ENSRNOG00000019500	Cyp1a1	-1.23691	2.66534e-08	4.24089e-06
ENSRNOG00000019504	Adprhl1	0.704247	2.63205e-06	0.000261745
ENSRNOG00000019656	Btd	0.650626	0.00062265	0.026776
ENSRNOG00000019742	Stat3	0.674249	2.74112e-05	0.00188604
ENSRNOG00000020097	Inha	0.955869	0.00010738	0.00604797
ENSRNOG00000020263	Atp1a3	-1.75098	5.67189e-11	1.44395e-08
ENSRNOG00000020298	Bag3	0.994762	6.90346e-09	1.23766e-06
ENSRNOG00000020372	Hdac4	1.25577	3.61157e-17	1.70266e-14
ENSRNOG00000020563	Cma1	-0.71746	0.000821229	0.0330805
ENSRNOG00000020622	Cilp2	1.40331	1.54325e-17	7.85761e-15
ENSRNOG00000020729	Stc2	-0.911135	1.19801e-05	0.000931391
ENSRNOG00000021062	Fxyd5	0.6881	0.000100563	0.00573804
ENSRNOG00000021149	Ush1c	0.73663	0.000224399	0.0110712
ENSRNOG00000021182	Sv2a	-0.994846	0.00017873	0.00917363
ENSRNOG00000021217	Itga10	0.812781	0.00120813	0.0435253
ENSRNOG00000022067	Tlr5	-1.10293	5.90803e-05	0.0037046
ENSRNOG00000022392	Hspb8	0.693302	9.54603e-05	0.00554847
ENSRNOG00000022523	Fkbp5	0.686086	1.30658e-05	0.000989965
ENSRNOG00000022760	RGD1304929	0.903572	0.00120414	0.0435253
ENSRNOG00000022762	Mettl21cl1	0.839581	0.000105389	0.00596223
ENSRNOG00000022946	Slc22a3	1.24073	2.87063e-08	4.51115e-06
ENSRNOG00000023257	Adamts9	0.902659	6.19169e-10	1.31357e-07
ENSRNOG00000023352	Fam78a	-0.632567	3.23593e-05	0.00219096
ENSRNOG00000023546	Hspb1	0.907647	2.41427e-07	3.0427e-05
ENSRNOG00000024479	Klhl34	0.670156	2.34905e-05	0.00165199
ENSRNOG00000024602	Plekha7	0.75562	6.77868e-06	0.000579099
ENSRNOG00000024904	Pla2g4e	-1.45004	1.71815e-07	2.30214e-05
ENSRNOG00000024986	Mmrn1	0.791256	6.81119e-07	7.88178e-05
ENSRNOG00000025527	Mtcl1	0.798435	4.58087e-06	0.000428749
ENSRNOG00000025670	Shisa3	0.925284	0.000613222	0.02646
ENSRNOG00000025764	AC128848.1	2.03902	5.31655e-13	1.87985e-10
ENSRNOG00000026128	Cpne8	0.587669	0.00065349	0.027544
ENSRNOG00000026302	Lrrn4cl	-0.585724	0.000898524	0.035151
ENSRNOG00000026647	Cxcl16	0.975288	5.03384e-06	0.000464317
ENSRNOG00000026793	Nt5dc3	0.657453	6.6041e-06	0.000567997
ENSRNOG00000026965	Tmem140	0.658423	2.92989e-05	0.00200509
ENSRNOG00000027089	Ell2	0.916023	3.26553e-10	7.16671e-08
ENSRNOG00000027271	RGD1359290	1.07466	3.61488e-11	9.58621e-09
ENSRNOG00000027731	Ubxn10	-1.01903	0.000476495	0.0212818
ENSRNOG00000027736	Cnn1	1.24169	1.00341e-11	2.83832e-09
ENSRNOG00000028598	Edar	-2.00676	6.4156e-12	1.94438e-09
ENSRNOG00000028690	LOC100362366	-1.87487	3.27426e-20	2.97701e-17
ENSRNOG00000029079	Hspb7	0.853874	2.25373e-06	0.000229501
ENSRNOG00000029401	Actg2	0.829031	6.5911e-06	0.000567997
ENSRNOG00000029543	Cish	-1.71182	6.37851e-14	2.46037e-11
ENSRNOG00000029871	Slc8a3	-0.650224	1.38103e-05	0.00102205
ENSRNOG00000029911	Cilp	-0.636699	1.71787e-05	0.00125671
ENSRNOG00000029980	Zbtb16	0.859171	3.37989e-09	6.61886e-07
ENSRNOG00000030475	Mum1l1	-0.643058	0.000349982	0.0164328
ENSRNOG00000030478	AY172581.9	8.33417	4.06824e-278	5.17846e-274
ENSRNOG00000030700	Mt-cox3	1.14954	1.57271e-06	0.000168227
ENSRNOG00000030721	Fbrsl1	0.739034	4.72275e-06	0.000438802
ENSRNOG00000031127	LOC100361838	-0.792996	0.000305806	0.0144329
ENSRNOG00000031162	Ccl24	-0.866931	5.15004e-05	0.00327774
ENSRNOG00000031167	Srxn1	1.3209	5.0021e-07	5.86981e-05
ENSRNOG00000031333	AY172581.10	-0.750898	2.24566e-05	0.00158806
ENSRNOG00000031515	Klra2	-0.967759	0.00030002	0.0142498
ENSRNOG00000031934	Enah	0.865495	3.28371e-08	4.97599e-06
ENSRNOG00000032133	Rnase2	-1.55235	1.52625e-10	3.5323e-08
ENSRNOG00000032605	Rpl32	-1.9315	8.92716e-19	5.68169e-16
ENSRNOG00000033348	Duox1	-0.914507	0.00145988	0.0499538
ENSRNOG00000033397	Adamts20	-0.704244	1.21373e-05	0.000936341
ENSRNOG00000033433	Csrnp1	0.698555	0.00106063	0.0397081
ENSRNOG00000033567	Musk	0.855047	1.19528e-05	0.000931391
ENSRNOG00000033653	Mpp3	0.687863	2.28301e-06	0.000230639
ENSRNOG00000036833	Zfp385a	-0.735919	4.84246e-07	5.76071e-05
ENSRNOG00000037085	Xirp1	1.55007	1.89443e-17	9.27471e-15
ENSRNOG00000042592	Rgs10	-0.740813	0.000407907	0.0188125
ENSRNOG00000042630	Asb5	0.613936	0.000173519	0.00894223
ENSRNOG00000042838	Junb	0.761365	1.12726e-06	0.000123697
ENSRNOG00000043098	Mt2A	2.33467	2.30124e-48	9.76416e-45
ENSRNOG00000043451	Spp1	0.916985	7.97257e-07	9.06096e-05
ENSRNOG00000045636	Fasn	-0.608746	4.19018e-05	0.00268024
ENSRNOG00000045649	Arrdc3	-0.815428	1.54987e-08	2.59583e-06
ENSRNOG00000045654	Hspa1a	1.9471	5.23256e-32	9.51503e-29
ENSRNOG00000045885	LOC100365810	-2.02675	2.03047e-30	2.87176e-27
ENSRNOG00000046081	AABR07015079.1	1.04569	6.60152e-08	9.33675e-06
ENSRNOG00000046600	AABR07015066.1	0.717721	1.07985e-05	0.000859086
ENSRNOG00000047505	Tubb4a	-1.00613	0.000131907	0.00720621
ENSRNOG00000047712	Dcx	-0.935347	0.000463139	0.0208315
ENSRNOG00000047876	LOC689986	1.27491	6.54433e-06	0.000567997
ENSRNOG00000047957	Traf5	-0.981292	1.09108e-05	0.000862631
ENSRNOG00000048472	Comp	1.63122	2.28905e-11	6.33421e-09
ENSRNOG00000048961	Bhlhe41	0.619927	7.46764e-05	0.004505
ENSRNOG00000049054	Ntsr2	1.54719	2.77235e-09	5.51394e-07
ENSRNOG00000049388	Prr32	-0.617025	0.000151478	0.00803404
ENSRNOG00000049530	AABR07012054.1	-0.865861	5.65428e-05	0.00356303
ENSRNOG00000050090	Slc6a17	0.738623	0.00143044	0.0493444
ENSRNOG00000050647	Hspa1b	1.9201	7.05059e-31	1.12184e-27
ENSRNOG00000052070	Aldh1a3	-1.02376	6.01688e-06	0.000535586
ENSRNOG00000052389	AABR07031489.1	-0.629837	0.000942885	0.0362598
ENSRNOG00000052493	AABR07068327.1	1.24749	3.91867e-06	0.000374211
ENSRNOG00000052758	Fam49a	0.63973	1.28826e-05	0.000987851
ENSRNOG00000052998	AABR07048791.1	1.03184	1.2788e-07	1.75031e-05
ENSRNOG00000053272	Chi3l1	0.852197	0.00115441	0.0423473
ENSRNOG00000053334	Stmn4	-1.02669	0.000137948	0.00741299
ENSRNOG00000053362	Gabarapl1	0.631083	3.72e-05	0.00241591
ENSRNOG00000053391	Rn50_18_0774.2	-0.616456	0.000514697	0.0225917
ENSRNOG00000053706	Lonrf1	0.730176	8.3439e-05	0.00496306
ENSRNOG00000054204	Gria2	-1.56523	2.60451e-08	4.19655e-06
ENSRNOG00000054945	LOC257642	0.643789	8.46967e-06	0.000701219
ENSRNOG00000055323	AABR07063421.1	1.07676	2.3852e-07	3.03612e-05
ENSRNOG00000055564	RGD1564664	0.818032	1.34593e-05	0.00100189
ENSRNOG00000055836	AABR07000402.1	1.05684	2.23163e-08	3.64185e-06
ENSRNOG00000055956	AABR07015078.1	0.703528	3.39317e-06	0.000329708
ENSRNOG00000056580	En1	0.941197	6.21818e-06	0.000549661
ENSRNOG00000056941	AABR07066529.4	0.98762	0.000223587	0.0110712
ENSRNOG00000057514	AABR07015080.1	1.04395	3.58432e-09	6.91285e-07
ENSRNOG00000057517	Rn60_X_0772.2	-1.46538	3.48613e-07	4.30825e-05
ENSRNOG00000057522	Fam134b	0.613898	2.43226e-05	0.00170112
ENSRNOG00000057811	AABR07015055.2	0.997278	1.03157e-07	1.42727e-05
ENSRNOG00000058645	Tnc	1.01898	4.96851e-12	1.5811e-09
ENSRNOG00000058862	AABR07051308.1	0.734768	8.28222e-06	0.000698175
ENSRNOG00000059467	AABR07033564.2	0.607244	0.000172737	0.00893809
ENSRNOG00000059714	Hsp90aa1	0.859348	1.43775e-07	1.94693e-05
ENSRNOG00000059827	LOC691995	-1.06404	5.42524e-05	0.00343571
ENSRNOG00000060518	LOC257642	0.628916	1.75933e-05	0.00127969
ENSRNOG00000060657	AABR07000404.1	1.02855	2.03941e-09	4.12058e-07
ENSRNOG00000060896	AABR07063424.1	0.745175	4.34288e-06	0.000409485
ENSRNOG00000062170	Pvt1	1.51736	9.31772e-08	1.30335e-05

## Sheet: DEGs in EW vs. W
Differentially expressed genes in exercise Wistar vs. Wistar
Ensembl ID	Gene	logFC	PValue	FDR
ENSRNOG00000000158	Cdo1	-1.72519	7.76287e-30	4.94068e-27
ENSRNOG00000000167	Alas2	-0.697246	0.00044442	0.0105541
ENSRNOG00000000443	C4a	-0.949434	4.8619e-10	4.32777e-08
ENSRNOG00000000451	RT1-Ba	-0.613863	7.31857e-05	0.00236442
ENSRNOG00000000495	Uhrf1bp1	0.8062	2.25479e-07	1.39326e-05
ENSRNOG00000000513	Mapk14	0.67977	2.46641e-05	0.000931601
ENSRNOG00000000521	Cdkn1a	-1.03087	1.82428e-10	1.74596e-08
ENSRNOG00000000525	Pi16	-0.81003	7.82909e-08	5.13693e-06
ENSRNOG00000000529	Pim1	0.934464	2.05037e-05	0.000808023
ENSRNOG00000000605	Hs3st5	-1.72267	3.04133e-10	2.76522e-08
ENSRNOG00000000640	Egr2	-0.823708	0.00281003	0.0444886
ENSRNOG00000000655	Ptprc	-0.630688	0.00091653	0.0187867
ENSRNOG00000000827	Ier3	-1.38146	9.38571e-14	1.29859e-11
ENSRNOG00000000836	Ltb	0.702349	0.000112139	0.00340673
ENSRNOG00000000853	Aif1	-0.721003	0.000841903	0.0175433
ENSRNOG00000000875	Fhl1	-1.04343	1.38178e-06	7.06371e-05
ENSRNOG00000000907	Alox5ap	-0.839755	8.86392e-05	0.00279032
ENSRNOG00000001001	Retn	-2.09321	3.53623e-18	7.62926e-16
ENSRNOG00000001082	Abcb9	0.987442	2.13581e-11	2.23412e-09
ENSRNOG00000001130	Nos1	1.40451	3.18706e-21	9.22002e-19
ENSRNOG00000001158	Abcg1	-0.617925	0.00279837	0.0443592
ENSRNOG00000001193	Hsf2bp	1.08331	0.000162096	0.00453478
ENSRNOG00000001242	Gstt3	-0.916737	2.74707e-05	0.00102846
ENSRNOG00000001285	Atp2a2	-1.71455	9.18128e-19	2.08694e-16
ENSRNOG00000001294	Ift81	-0.983827	7.74232e-07	4.1937e-05
ENSRNOG00000001295	S100b	-1.51391	1.2393e-22	4.38194e-20
ENSRNOG00000001376	Mettl7a	-1.42564	1.08444e-21	3.28664e-19
ENSRNOG00000001414	Serpine1	-1.05612	2.22802e-11	2.30573e-09
ENSRNOG00000001452	Fzd9	-1.02676	1.67759e-08	1.22725e-06
ENSRNOG00000001480	Ncf1	-1.16852	7.97086e-14	1.12734e-11
ENSRNOG00000001528	Gap43	-0.8268	0.000104899	0.00322526
ENSRNOG00000001557	Cxadr	-0.835931	0.00181422	0.0320023
ENSRNOG00000001689	Arl6	-0.68857	0.00193505	0.0337877
ENSRNOG00000001821	Adipoq	-2.20909	1.99195e-45	3.62221e-42
ENSRNOG00000001892	Tbx1	-0.603723	0.000193728	0.00532604
ENSRNOG00000001912	Tecrl	-1.19247	1.3097e-09	1.12643e-07
ENSRNOG00000001924	Tp63	-2.0092	2.75239e-24	1.16784e-21
ENSRNOG00000001959	Mx1	-0.696144	8.6701e-05	0.00274698
ENSRNOG00000001963	Mx2	-0.617116	0.00010183	0.00313849
ENSRNOG00000002052	Ccdc80	-0.874467	1.25433e-07	7.90416e-06
ENSRNOG00000002180	Tbc1d1	1.49167	9.44535e-22	2.93243e-19
ENSRNOG00000002217	Plac8	-1.0236	1.74537e-06	8.61119e-05
ENSRNOG00000002218	Stbd1	0.593886	0.000313996	0.00799371
ENSRNOG00000002232	Aff1	0.781726	6.4148e-08	4.32032e-06
ENSRNOG00000002273	Naaa	-0.810274	0.000116908	0.00353474
ENSRNOG00000002303	Kcnj12	0.714175	3.06833e-06	0.000144655
ENSRNOG00000002305	Slc15a2	-1.1245	9.14549e-07	4.90583e-05
ENSRNOG00000002331	Aldh3a1	-1.64679	1.35451e-09	1.15715e-07
ENSRNOG00000002434	Tmem100	-0.7093	1.02656e-06	5.39964e-05
ENSRNOG00000002753	Adam11	0.743773	0.000282607	0.00731159
ENSRNOG00000002852	Myo19	0.768066	2.49085e-05	0.000938047
ENSRNOG00000002886	Myh10	-0.868234	4.33709e-09	3.5389e-07
ENSRNOG00000002894	Mnt	0.644569	0.000779538	0.0166149
ENSRNOG00000002979	Tbx19	0.741031	0.00252682	0.0411303
ENSRNOG00000003063	Phka1	0.666286	0.000225186	0.00603451
ENSRNOG00000003134	Slc4a4	1.2811	7.62021e-14	1.08986e-11
ENSRNOG00000003187	LOC102552920	-0.858207	7.03813e-05	0.00230304
ENSRNOG00000003205	Ldb2	-0.680596	0.000379685	0.00925863
ENSRNOG00000003237	Tp53bp2	0.757614	3.01434e-07	1.76818e-05
ENSRNOG00000003273	Spata20	-0.890038	0.000937401	0.0191221
ENSRNOG00000003278	Map3k14	-0.759318	2.80222e-05	0.00104603
ENSRNOG00000003300	Btg2	-0.587917	8.67535e-05	0.00274698
ENSRNOG00000003304	Chad	-1.42674	3.97441e-15	6.48594e-13
ENSRNOG00000003330	Acsf2	-0.829019	1.52672e-06	7.65101e-05
ENSRNOG00000003348	Rasd1	-1.55308	6.935e-09	5.35004e-07
ENSRNOG00000003515	Ephx1	-0.716064	1.04878e-06	5.4713e-05
ENSRNOG00000003562	Susd4	0.63031	0.00147608	0.0270713
ENSRNOG00000003616	Grem2	-0.724513	0.000909594	0.0186746
ENSRNOG00000003620	Fmo3	-0.71192	0.000120242	0.00359383
ENSRNOG00000003674	Pir	-0.625554	0.00100839	0.0201525
ENSRNOG00000003694	Prox1	-0.728666	0.000110665	0.00337807
ENSRNOG00000003704	Fam184b	0.679914	0.000529439	0.0121647
ENSRNOG00000003972	Tshr	-1.53621	5.9029e-09	4.60969e-07
ENSRNOG00000003977	Dusp1	-0.939494	2.6398e-09	2.19621e-07
ENSRNOG00000004109	Zfpm2	-0.935434	0.00108424	0.0211029
ENSRNOG00000004158	Hdac9	-1.04174	1.65304e-06	8.18738e-05
ENSRNOG00000004160	Prps2	-0.761445	3.39332e-05	0.00123764
ENSRNOG00000004377	Lpin1	1.55753	5.30131e-20	1.37715e-17
ENSRNOG00000004442	RGD1311756	-0.660276	2.58674e-05	0.000971286
ENSRNOG00000004500	Myc	-0.780435	6.58162e-05	0.00219313
ENSRNOG00000004537	Rxrg	0.629635	4.50199e-05	0.00156147
ENSRNOG00000004540	Clec3b	-0.667374	3.82139e-06	0.000176241
ENSRNOG00000004563	Sec24a	0.636386	1.11946e-05	0.000468738
ENSRNOG00000004645	Galnt5	-1.77785	1.33655e-23	5.31653e-21
ENSRNOG00000004821	Sntb1	0.79174	2.55579e-07	1.57163e-05
ENSRNOG00000004863	Mpped2	-0.984712	0.000169946	0.00472324
ENSRNOG00000004878	Myf6	0.733506	1.29603e-05	0.000533889
ENSRNOG00000005008	Angpt4	-1.1226	7.47084e-07	4.06394e-05
ENSRNOG00000005275	Shmt1	0.618332	0.000550355	0.0124652
ENSRNOG00000005569	Phospho1	0.596754	0.000728753	0.015776
ENSRNOG00000005574	Adamts8	-1.80272	2.95128e-25	1.39136e-22
ENSRNOG00000005690	Lmcd1	-1.3872	9.07099e-17	1.62626e-14
ENSRNOG00000005792	Ankef1	-1.97683	5.23827e-13	6.80387e-11
ENSRNOG00000005883	Nek10	1.41238	2.78135e-07	1.66762e-05
ENSRNOG00000005905	Pde4b	0.5975	4.47049e-05	0.00155478
ENSRNOG00000005964	Nr4a3	3.30847	1.31805e-90	4.19435e-87
ENSRNOG00000005998	Smoc1	-1.15022	6.82048e-05	0.00225501
ENSRNOG00000006019	G0s2	2.04339	7.57431e-41	1.07126e-37
ENSRNOG00000006025	Lamb3	0.893515	9.04964e-05	0.00283029
ENSRNOG00000006118	Klf10	0.644295	7.71511e-06	0.00033864
ENSRNOG00000006119	Slc7a15	-1.14556	0.000109691	0.0033564
ENSRNOG00000006204	Slc30a3	-0.689743	0.00271301	0.0432756
ENSRNOG00000006388	Pygl	-1.11323	1.04647e-06	5.4713e-05
ENSRNOG00000006509	Srgap3	0.853603	0.00263558	0.0424002
ENSRNOG00000006583	Hpgds	-1.003	0.000676995	0.014935
ENSRNOG00000006689	Chd7	1.80466	8.31209e-32	5.87803e-29
ENSRNOG00000006715	Ccr1	-0.713863	0.00100754	0.0201525
ENSRNOG00000006738	Fbxo32	-1.10302	6.0022e-12	7.00936e-10
ENSRNOG00000006972	Zfp189	0.698924	4.96676e-05	0.00169043
ENSRNOG00000007159	Ccl2	-1.02459	0.000118948	0.00357552
ENSRNOG00000007241	Fnbp4	0.656071	4.55054e-05	0.00157402
ENSRNOG00000007254	Ttc9	0.660724	0.000106723	0.00327343
ENSRNOG00000007286	Mdm1	-0.781654	0.00107071	0.0209978
ENSRNOG00000007390	Nfkbia	-0.729936	7.41488e-07	4.05082e-05
ENSRNOG00000007433	Cyb561	-1.0193	9.92258e-07	5.24085e-05
ENSRNOG00000007459	Pcnx1	0.818322	7.21548e-07	3.95887e-05
ENSRNOG00000007490	Gabrr2	-0.865645	0.00125764	0.0238577
ENSRNOG00000007541	Fhl3	0.66584	0.000114525	0.00347092
ENSRNOG00000007590	Eya1	0.625062	0.00042818	0.0102066
ENSRNOG00000007625	B3galt1	-1.24986	4.86525e-05	0.00166927
ENSRNOG00000007632	Mss51	0.711396	3.50686e-05	0.00126815
ENSRNOG00000007660	Fntb	0.64007	4.63392e-05	0.00159419
ENSRNOG00000007687	Sema7a	0.753824	4.02014e-06	0.000184738
ENSRNOG00000007743	Mgst1	-1.54653	7.45725e-19	1.75784e-16
ENSRNOG00000007822	Vgll4	0.898018	2.00279e-07	1.24359e-05
ENSRNOG00000007830	Apold1	-0.885744	2.65312e-07	1.60817e-05
ENSRNOG00000007896	Klhl38	-0.838413	7.02346e-09	5.38564e-07
ENSRNOG00000007923	Cgref1	-0.83689	0.000122471	0.00363389
ENSRNOG00000007947	Fam13a	-1.07206	1.08808e-11	1.22568e-09
ENSRNOG00000008015	Fos	-1.40542	1.48989e-17	2.96325e-15
ENSRNOG00000008049	Max	0.613481	6.89133e-05	0.00226666
ENSRNOG00000008056	Ankrd9	0.951192	7.19465e-10	6.31591e-08
ENSRNOG00000008165	Tpx2	0.779789	5.31034e-08	3.61472e-06
ENSRNOG00000008236	Decr1	-1.15528	7.16896e-15	1.14067e-12
ENSRNOG00000008334	Crocc	1.08841	7.13116e-11	6.9825e-09
ENSRNOG00000008336	Tnfrsf11b	-1.06279	2.18275e-08	1.56973e-06
ENSRNOG00000008533	Ago2	0.748016	5.79343e-06	0.000260582
ENSRNOG00000008536	Actc1	-0.762623	2.58687e-07	1.58309e-05
ENSRNOG00000008592	Barx2	-0.842738	1.13461e-07	7.22125e-06
ENSRNOG00000008620	Smad3	0.734543	9.92601e-06	0.000421161
ENSRNOG00000008706	Tbx3	-0.658051	0.00244738	0.040249
ENSRNOG00000008797	Tmpo	0.868767	1.58398e-08	1.16546e-06
ENSRNOG00000008829	Sorbs3	-0.599939	3.09217e-05	0.00114088
ENSRNOG00000008834	Dach1	-0.923849	0.00016828	0.00468718
ENSRNOG00000008839	Pparg	-0.927195	4.39875e-06	0.000200906
ENSRNOG00000008847	Gja3	0.944245	0.000725108	0.0157473
ENSRNOG00000008915	Prima1	1.43249	9.27122e-22	2.93243e-19
ENSRNOG00000008947	Cpz	-0.701389	0.000262145	0.0068378
ENSRNOG00000008987	Rnf139	0.795106	1.17016e-07	7.41041e-06
ENSRNOG00000009047	Sln	-0.618682	0.00250363	0.0409098
ENSRNOG00000009073	Tnni1	-2.19252	4.11468e-32	3.08093e-29
ENSRNOG00000009079	Prkar2b	-1.31949	3.96609e-14	5.93933e-12
ENSRNOG00000009094	Nudt4	-0.594113	0.000413062	0.00990183
ENSRNOG00000009131	Zc3h12a	0.773133	1.40355e-05	0.000572622
ENSRNOG00000009145	Klf12	0.711229	0.00352282	0.0494548
ENSRNOG00000009153	Cidec	-1.70151	5.59593e-25	2.54395e-22
ENSRNOG00000009291	Dnase1l3	-0.980746	0.000133577	0.0038703
ENSRNOG00000009389	Ripk2	-0.617189	0.000198942	0.00545761
ENSRNOG00000009465	Sfrp2	-0.956078	3.48645e-05	0.00126436
ENSRNOG00000009482	Emx2	-1.43264	2.8036e-07	1.66762e-05
ENSRNOG00000009686	Aqp7	-1.76936	3.6578e-17	6.84708e-15
ENSRNOG00000009790	Kcnk3	-1.01877	0.000127382	0.00373604
ENSRNOG00000009826	Bche	-1.10242	4.9106e-06	0.000223239
ENSRNOG00000010017	Wee1	-1.11073	4.9544e-12	5.83931e-10
ENSRNOG00000010047	Ddit4l	-0.58619	5.27665e-05	0.00178634
ENSRNOG00000010078	Spag1	-0.670981	0.00131183	0.0247016
ENSRNOG00000010107	Palld	0.679643	1.31282e-05	0.000539063
ENSRNOG00000010137	Xpo4	-1.42877	3.10753e-20	8.24079e-18
ENSRNOG00000010319	Lcp1	-0.656673	4.08663e-05	0.00143729
ENSRNOG00000010478	LOC299282	-1.15751	8.39397e-14	1.17414e-11
ENSRNOG00000010488	Zmiz1	0.601254	0.000164883	0.00460261
ENSRNOG00000010524	Cryab	-0.774392	4.0875e-05	0.00143729
ENSRNOG00000010549	Tspo	-0.690486	0.000155342	0.00437467
ENSRNOG00000010551	Lhx2	0.942278	0.00169201	0.030207
ENSRNOG00000010574	Ptpn1	0.617937	9.4982e-05	0.00295605
ENSRNOG00000010666	Wisp2	-1.09281	2.00155e-06	9.79914e-05
ENSRNOG00000010681	Pitx2	-1.5531	2.10559e-17	4.06092e-15
ENSRNOG00000010691	Cmtm3	-0.647813	0.001389	0.0258489
ENSRNOG00000010799	Noct	0.999276	1.35135e-11	1.50889e-09
ENSRNOG00000010834	Mpped1	1.47325	1.51825e-07	9.47343e-06
ENSRNOG00000010881	Trak2	0.625384	0.000130145	0.00379087
ENSRNOG00000010918	Cebpa	-0.977961	1.46577e-06	7.43336e-05
ENSRNOG00000010938	Slc7a10	-2.45362	1.1778e-15	1.97267e-13
ENSRNOG00000010959	Klhl25	0.660588	0.0011507	0.0221257
ENSRNOG00000011145	Crhr2	-0.959631	3.55617e-07	2.05757e-05
ENSRNOG00000011181	Cpa3	-0.716646	5.87089e-05	0.00198224
ENSRNOG00000011227	Atp1b2	0.655831	0.00033723	0.00845
ENSRNOG00000011271	Mcc	0.635623	0.00111754	0.0216847
ENSRNOG00000011300	Lama3	0.81255	7.84241e-06	0.00034187
ENSRNOG00000011329	Pkm	0.715224	0.00114398	0.0220299
ENSRNOG00000011339	Slk	0.739365	6.69251e-07	3.70387e-05
ENSRNOG00000011417	Pde3b	-0.803336	0.00028604	0.00734073
ENSRNOG00000011568	Rspo3	-1.82655	1.44902e-19	3.54703e-17
ENSRNOG00000011647	S100a6	-0.629798	1.4004e-05	0.000572622
ENSRNOG00000011668	Nfil3	0.888888	5.76301e-09	4.55636e-07
ENSRNOG00000011704	Fbxo34	0.684294	2.44363e-06	0.00011827
ENSRNOG00000011750	Fam180a	-1.12548	1.06093e-05	0.00044717
ENSRNOG00000011754	Myom2	0.711362	0.000371374	0.00912321
ENSRNOG00000011758	Fkbp7	-0.593675	0.00104534	0.0207002
ENSRNOG00000011800	F3	-0.790581	1.11229e-07	7.11473e-06
ENSRNOG00000011821	S100a4	-0.866095	5.14264e-09	4.11702e-07
ENSRNOG00000011892	Slc36a2	-1.88136	1.80963e-08	1.31627e-06
ENSRNOG00000011901	Rrad	-1.19248	6.71779e-14	9.82883e-12
ENSRNOG00000011921	Dusp4	0.632296	0.00201919	0.0347853
ENSRNOG00000011936	Abhd14a	0.667569	0.000159545	0.00447325
ENSRNOG00000012109	Fam105a	-0.764576	0.00172871	0.0307759
ENSRNOG00000012141	Xrcc3	0.812946	0.00173428	0.0308319
ENSRNOG00000012181	Lpl	-0.713312	6.24325e-05	0.00209132
ENSRNOG00000012404	Thrsp	-2.3077	1.27346e-43	2.02624e-40
ENSRNOG00000012428	Maf	0.929022	2.98386e-10	2.73248e-08
ENSRNOG00000012430	Cxcr5	-0.851006	0.00287307	0.0453176
ENSRNOG00000012438	Larp6	-0.822428	0.00169489	0.030216
ENSRNOG00000012475	Prr5	-0.738465	8.87799e-05	0.00279032
ENSRNOG00000012508	Slc39a8	-1.09639	7.17221e-05	0.00233952
ENSRNOG00000012653	Ppp1r13b	0.79044	3.21434e-07	1.87685e-05
ENSRNOG00000012663	Mfsd6	0.852683	4.93698e-09	3.9774e-07
ENSRNOG00000012726	Zbtb5	0.746712	1.16079e-05	0.000484449
ENSRNOG00000012759	Col19a1	0.857361	0.00206864	0.0353968
ENSRNOG00000012787	Tmem164	-0.599908	0.0017663	0.0312701
ENSRNOG00000012807	C1qa	-0.744206	3.96357e-07	2.28291e-05
ENSRNOG00000012817	Lrrc17	-0.895378	0.000184264	0.0050989
ENSRNOG00000012881	Fgl2	-0.652042	8.31858e-06	0.00036139
ENSRNOG00000012972	Alox5	-0.825146	0.000145804	0.00417065
ENSRNOG00000013000	Ldhb	-1.44132	1.06905e-17	2.15998e-15
ENSRNOG00000013018	Eda2r	-1.89732	6.3336e-21	1.75262e-18
ENSRNOG00000013034	Dupd1	0.725937	4.29017e-07	2.43793e-05
ENSRNOG00000013090	Gadd45g	-0.60402	3.78783e-05	0.0013468
ENSRNOG00000013128	Tmem179	-1.82537	7.55602e-12	8.74368e-10
ENSRNOG00000013232	Nr6a1	1.36579	4.05791e-07	2.32672e-05
ENSRNOG00000013290	Nrip3	-0.891399	0.000832681	0.0174043
ENSRNOG00000013397	Foxo1	1.01828	3.66886e-12	4.44771e-10
ENSRNOG00000013484	LOC102550391	-0.743776	2.80344e-07	1.66762e-05
ENSRNOG00000013552	Scd	-2.17209	1.68107e-45	3.5664e-42
ENSRNOG00000013577	Kdelr3	-0.79696	4.9811e-06	0.000225639
ENSRNOG00000013578	Trem2	-1.47915	2.61685e-07	1.59378e-05
ENSRNOG00000013586	Snai3	-0.791223	0.000314991	0.00800303
ENSRNOG00000013663	Tmem86a	-0.864726	0.000481168	0.0112188
ENSRNOG00000013840	Ankrd2	-1.5715	3.12076e-22	1.01857e-19
ENSRNOG00000013920	Arhgap26	0.866034	0.00119475	0.0229382
ENSRNOG00000013971	Psat1	-0.778981	0.00205644	0.0353257
ENSRNOG00000014055	Nat1	-0.693687	0.00278208	0.0441657
ENSRNOG00000014205	Klf2	-0.611657	3.17999e-05	0.00116989
ENSRNOG00000014237	Zfp503	-0.744978	4.40354e-06	0.000200906
ENSRNOG00000014327	Csrp3	-1.23946	7.23483e-13	9.02864e-11
ENSRNOG00000014338	Slc25a25	0.932667	1.33862e-08	1.00231e-06
ENSRNOG00000014343	Anln	0.941627	0.000884203	0.0182711
ENSRNOG00000014350	Cyr61	-0.981048	1.8202e-11	1.947e-09
ENSRNOG00000014361	Edn1	-0.871694	0.00194537	0.0338749
ENSRNOG00000014366	Shc3	0.823358	0.00263814	0.0424002
ENSRNOG00000014448	Arntl	0.945123	4.82844e-09	3.91473e-07
ENSRNOG00000014515	Cdc14a	0.704208	1.27175e-06	6.55391e-05
ENSRNOG00000014549	Arhgef26	-0.800385	0.00136235	0.0255019
ENSRNOG00000014597	Irs1	0.978467	4.32568e-11	4.30168e-09
ENSRNOG00000014610	Anpep	-0.686944	1.56104e-05	0.000632818
ENSRNOG00000014613	Ddah1	-0.656588	0.000283808	0.00731295
ENSRNOG00000014659	Ebpl	-0.724205	0.00259154	0.0420762
ENSRNOG00000014710	Prom2	0.780997	0.000466539	0.010977
ENSRNOG00000014751	Ret	-0.644376	0.000450064	0.0106485
ENSRNOG00000014758	Lgi1	-1.7993	7.6662e-15	1.20473e-12
ENSRNOG00000014815	Myoz2	-1.70015	3.10336e-22	1.01857e-19
ENSRNOG00000014879	Ttc7a	0.602812	2.91735e-05	0.00108265
ENSRNOG00000014900	Crem	1.23849	6.22424e-17	1.14824e-14
ENSRNOG00000015036	Ctgf	-1.0556	2.96004e-12	3.62292e-10
ENSRNOG00000015086	Plin1	-2.13847	5.04842e-38	6.42614e-35
ENSRNOG00000015222	Fam46c	-1.59813	6.98612e-07	3.84963e-05
ENSRNOG00000015279	Vtcn1	-0.96705	1.50794e-06	7.58677e-05
ENSRNOG00000015283	Nt5c1a	0.859099	5.68023e-09	4.51898e-07
ENSRNOG00000015347	Trim45	-0.693635	7.30285e-05	0.00236442
ENSRNOG00000015445	Mal	-0.719672	0.000134716	0.00388842
ENSRNOG00000015501	Ddhd2	0.588606	0.000191836	0.00528547
ENSRNOG00000015518	Rbp4	-1.91256	6.1489e-23	2.30204e-20
ENSRNOG00000015519	Ces1d	-1.94076	1.78411e-37	2.06453e-34
ENSRNOG00000015701	Rreb1	0.808288	5.1896e-08	3.55153e-06
ENSRNOG00000015751	Cyp4f18	1.04275	2.90422e-08	2.06524e-06
ENSRNOG00000015850	Rbp7	-1.4172	2.64687e-14	4.05928e-12
ENSRNOG00000015904	Wfdc1	0.782341	9.92103e-08	6.37802e-06
ENSRNOG00000015948	Slc1a5	-0.918516	7.60172e-08	5.01359e-06
ENSRNOG00000015986	Rassf8	0.672127	3.74638e-06	0.00017341
ENSRNOG00000016043	Aqp4	-0.6569	1.67383e-05	0.000674248
ENSRNOG00000016123	Rnf144b	-0.701972	1.34162e-06	6.88607e-05
ENSRNOG00000016163	Slc1a3	-1.39226	1.79486e-11	1.93617e-09
ENSRNOG00000016164	Fcrl2	-1.14002	1.22713e-05	0.000507146
ENSRNOG00000016166	Pdlim1	-0.599288	4.87871e-05	0.00166938
ENSRNOG00000016243	Casq2	-1.68976	5.9837e-28	3.31159e-25
ENSRNOG00000016244	Mical2	1.71993	6.2339e-25	2.73625e-22
ENSRNOG00000016412	Fxyd6	-0.736615	6.77461e-05	0.00224568
ENSRNOG00000016432	LOC56764	-1.05441	0.00025811	0.00677134
ENSRNOG00000016442	Hoxc6	-0.743961	0.00197771	0.0343442
ENSRNOG00000016456	Il33	-0.687471	2.24613e-06	0.000109126
ENSRNOG00000016488	Pltp	-0.59486	4.16222e-05	0.00145953
ENSRNOG00000016541	Enc1	-1.04544	1.70802e-11	1.85824e-09
ENSRNOG00000016573	Dgat2	-0.866981	6.55956e-09	5.09126e-07
ENSRNOG00000016581	Serpinb1a	-0.690828	0.000200702	0.00548226
ENSRNOG00000016627	Eya4	0.600411	0.000205012	0.005588
ENSRNOG00000016647	Pla2g2c	0.829063	0.00208539	0.0355777
ENSRNOG00000016706	Fanca	1.01074	9.87695e-05	0.00306643
ENSRNOG00000016728	Tiam2	0.599197	0.000703517	0.0153867
ENSRNOG00000016740	Fam210a	1.16444	1.03963e-15	1.76446e-13
ENSRNOG00000016826	Pla2g2d	-0.623445	0.00131653	0.0247535
ENSRNOG00000016827	Slc38a3	0.806003	4.56035e-07	2.57994e-05
ENSRNOG00000016848	Fzd4	-0.88315	4.37789e-08	3.04515e-06
ENSRNOG00000016866	Fhl2	-1.48033	3.05147e-13	4.00434e-11
ENSRNOG00000016945	Pla2g2a	-0.869242	3.43263e-06	0.000161232
ENSRNOG00000016950	Otud1	-0.646251	3.52692e-05	0.00127179
ENSRNOG00000016962	Neu2	-0.598658	0.000351072	0.00869416
ENSRNOG00000016983	Myh7	-1.95039	1.08466e-18	2.42221e-16
ENSRNOG00000017063	Fcna	-0.740133	6.1386e-06	0.000275135
ENSRNOG00000017065	Arhgap28	1.31742	1.46042e-14	2.26703e-12
ENSRNOG00000017206	Igfbp5	-0.907801	5.07187e-08	3.48972e-06
ENSRNOG00000017332	Dapk2	-0.842287	9.17266e-07	4.90583e-05
ENSRNOG00000017392	Fgf2	1.10552	7.20325e-05	0.00233952
ENSRNOG00000017414	Irf7	-0.638802	2.93727e-05	0.00108688
ENSRNOG00000017421	Alpk2	0.752697	9.70045e-07	5.14488e-05
ENSRNOG00000017428	Map1b	0.670727	2.07182e-05	0.000813532
ENSRNOG00000017441	Tpm3	-1.84522	1.70475e-22	5.86481e-20
ENSRNOG00000017477	Mmp23	-0.724018	0.000650336	0.0144218
ENSRNOG00000017528	Gpr157	0.801465	4.62537e-08	3.1998e-06
ENSRNOG00000017548	Fam53a	0.600451	3.76055e-05	0.00134084
ENSRNOG00000017637	Fbp2	0.979879	4.49821e-11	4.43858e-09
ENSRNOG00000017693	Slc2a5	0.971154	0.000222174	0.00596636
ENSRNOG00000017716	Ucp3	1.36767	4.67049e-15	7.5254e-13
ENSRNOG00000017766	Car12	3.46099	1.74879e-99	7.42014e-96
ENSRNOG00000017808	Klf15	-0.609895	2.20117e-05	0.000851581
ENSRNOG00000017874	Cd53	-0.638492	0.0025128	0.041007
ENSRNOG00000018166	Prkab2	0.61417	0.000342106	0.00853846
ENSRNOG00000018198	Dapk1	1.36897	2.38118e-20	6.44894e-18
ENSRNOG00000018207	Dynlt1	-0.816826	2.38227e-05	0.000907903
ENSRNOG00000018262	Ampd3	-1.17436	6.23387e-13	8.01525e-11
ENSRNOG00000018279	Sfxn1	-0.764974	0.000149787	0.00425588
ENSRNOG00000018285	Kcna2	-0.830358	0.00147922	0.0270713
ENSRNOG00000018384	Adam12	0.759165	0.00351936	0.0496542
ENSRNOG00000018445	Agt	-0.981071	9.91307e-09	7.46648e-07
ENSRNOG00000018494	Ppp1r3c	1.13554	6.1335e-10	5.42176e-08
ENSRNOG00000018505	Cidea	-0.989567	0.00015417	0.00435128
ENSRNOG00000018566	Ctsl	-0.596169	0.000342773	0.00853846
ENSRNOG00000018598	Ankrd1	-0.658003	1.18066e-05	0.000489533
ENSRNOG00000018603	Carns1	0.600043	8.38053e-05	0.00266689
ENSRNOG00000018646	Hbegf	-0.589208	4.90444e-05	0.00167369
ENSRNOG00000018694	Lipg	-1.39086	4.31432e-10	3.86739e-08
ENSRNOG00000018712	Camk2a	0.60716	3.36183e-05	0.00122968
ENSRNOG00000018760	Mpp7	-0.875441	3.20253e-05	0.00117478
ENSRNOG00000018780	Sh3rf2	-0.712505	2.27911e-05	0.000871193
ENSRNOG00000018943	Tnnc1	-2.22319	6.96935e-34	6.82407e-31
ENSRNOG00000018997	Myh7b	-1.44757	9.16445e-23	3.33298e-20
ENSRNOG00000019065	Zfp385b	-1.32565	1.94873e-11	2.06711e-09
ENSRNOG00000019132	Fv1	-0.842415	0.000405239	0.00975102
ENSRNOG00000019179	Ggta1	0.786282	1.12739e-06	5.85735e-05
ENSRNOG00000019217	Adrb2	-0.93352	2.88662e-07	1.7011e-05
ENSRNOG00000019328	Phgdh	-1.18861	5.46583e-06	0.000246718
ENSRNOG00000019422	Egr1	-0.859875	9.37588e-08	6.05815e-06
ENSRNOG00000019466	Agpat2	-0.975899	7.1473e-06	0.000318105
ENSRNOG00000019490	Slc20a2	-0.698919	2.5149e-06	0.000121258
ENSRNOG00000019500	Cyp1a1	-0.888078	6.09556e-05	0.00204724
ENSRNOG00000019527	Chrnd	-1.19533	2.75149e-10	2.53795e-08
ENSRNOG00000019598	Vegfa	0.766338	1.54865e-05	0.000629802
ENSRNOG00000019615	Colq	-0.932938	0.00041645	0.00996427
ENSRNOG00000019627	Mybpc2	0.696205	0.00206892	0.0353968
ENSRNOG00000019659	Aspa	0.823392	6.35203e-06	0.000283702
ENSRNOG00000019737	Sema4a	-0.68674	0.00294595	0.0462379
ENSRNOG00000019859	Pla2g15	-0.62674	0.000493054	0.0114318
ENSRNOG00000019890	Folr2	-0.766782	0.000117592	0.003547
ENSRNOG00000019926	Ramp1	-1.50283	7.99716e-20	2.03592e-17
ENSRNOG00000020006	Wdr90	0.635305	0.00247987	0.0406781
ENSRNOG00000020097	Inha	0.86007	0.00066678	0.0147608
ENSRNOG00000020242	Art5	-0.603652	4.62132e-05	0.00159417
ENSRNOG00000020339	Neurl1	0.603492	0.000291005	0.00743815
ENSRNOG00000020457	Tacc2	0.634406	0.000360861	0.00890193
ENSRNOG00000020563	Cma1	-1.1639	1.3024e-07	8.16664e-06
ENSRNOG00000020656	Pfkfb4	0.896771	3.40998e-08	2.3981e-06
ENSRNOG00000020836	Rorc	-0.600586	0.000558389	0.0126024
ENSRNOG00000020845	Tyrobp	-0.96531	1.66774e-05	0.000673924
ENSRNOG00000020884	Cd6	-1.07053	3.9875e-05	0.00140991
ENSRNOG00000020904	Cdc42ep2	-0.782383	8.36638e-06	0.00036223
ENSRNOG00000020906	Pola2	-0.632569	0.000149523	0.00425588
ENSRNOG00000020938	Ppp1r15a	-0.630715	1.70823e-05	0.000685934
ENSRNOG00000020952	Cgn	1.93089	1.34864e-15	2.22947e-13
ENSRNOG00000020955	Myl3	-1.39146	1.40643e-13	1.90451e-11
ENSRNOG00000020956	Bcat2	-0.636948	2.81984e-05	0.00104952
ENSRNOG00000021027	Dbp	-0.591466	0.000110983	0.00337966
ENSRNOG00000021149	Ush1c	1.75314	3.31795e-18	7.28177e-16
ENSRNOG00000021173	Vps45	0.640638	1.08848e-05	0.00045727
ENSRNOG00000021261	Rassf2	1.06206	2.47973e-10	2.33722e-08
ENSRNOG00000021440	Pptc7	1.06026	7.55928e-10	6.59056e-08
ENSRNOG00000021478	Tpd52l1	-1.5947	6.31019e-13	8.03224e-11
ENSRNOG00000021526	Slc25a34	-0.819223	1.2121e-06	6.27186e-05
ENSRNOG00000021691	Ccdc92	0.720897	7.3087e-06	0.000324155
ENSRNOG00000021817	Irak2	0.6116	0.00208512	0.0355777
ENSRNOG00000022009	Mzb1	1.00857	0.000921087	0.0188497
ENSRNOG00000022067	Tlr5	-0.910624	0.00107833	0.0210522
ENSRNOG00000022239	Tusc5	-0.865173	6.64586e-08	4.45238e-06
ENSRNOG00000022523	Fkbp5	1.68548	1.20353e-25	5.89219e-23
ENSRNOG00000022610	Agbl1	-1.10634	8.83403e-13	1.09173e-10
ENSRNOG00000022723	RGD1562029	1.16305	9.16717e-06	0.000391574
ENSRNOG00000022762	Mettl21cl1	2.12826	8.94123e-18	1.83569e-15
ENSRNOG00000022784	AABR07036035.1	-1.35906	3.23739e-07	1.88168e-05
ENSRNOG00000022975	Nfam1	-0.753197	0.00114191	0.0220234
ENSRNOG00000023116	Agmo	-0.901834	0.000949942	0.019316
ENSRNOG00000023150	Gpi	0.639114	0.000860345	0.017836
ENSRNOG00000023162	Car14	0.734199	2.79072e-06	0.000132549
ENSRNOG00000023257	Adamts9	0.890896	1.89095e-09	1.58354e-07
ENSRNOG00000023261	Ube2q2l	0.811351	0.00194322	0.0338749
ENSRNOG00000023312	Lonrf2	0.660011	7.96112e-05	0.00255257
ENSRNOG00000023546	Hspb1	-0.585212	0.00082756	0.0173257
ENSRNOG00000023566	Vwa3b	0.62118	0.000793785	0.0168402
ENSRNOG00000023708	Tmem176a	-0.594186	0.000256555	0.00677134
ENSRNOG00000023837	Mtx3	0.724014	0.000448135	0.0106225
ENSRNOG00000023943	Gbp1	0.858246	8.77407e-08	5.69822e-06
ENSRNOG00000023995	Ankrd39	0.754007	0.000514205	0.011879
ENSRNOG00000024115	C6	-1.193	2.49715e-10	2.33722e-08
ENSRNOG00000024159	Fcer1g	-0.619309	0.00165976	0.0297565
ENSRNOG00000024410	Blvrb	-0.631494	0.00020679	0.00562444
ENSRNOG00000024435	Wbscr17	0.58655	0.000261127	0.00682524
ENSRNOG00000024479	Klhl34	-0.716173	7.56378e-06	0.000333147
ENSRNOG00000024602	Plekha7	1.97435	1.62953e-29	9.42834e-27
ENSRNOG00000024705	Rarres2	-0.653562	2.07713e-05	0.000813532
ENSRNOG00000024824	Col22a1	0.658283	2.45396e-05	0.000929657
ENSRNOG00000024904	Pla2g4e	-1.20093	2.27408e-05	0.000871193
ENSRNOG00000024923	Nnat	-1.20872	1.56303e-13	2.0943e-11
ENSRNOG00000025448	Limd2	-0.721528	0.00304199	0.0474684
ENSRNOG00000025634	Zfhx2	0.855919	6.67203e-07	3.70387e-05
ENSRNOG00000025757	Myh6	-1.99975	1.38483e-32	1.17517e-29
ENSRNOG00000026087	Igfn1	1.12795	6.92266e-13	8.72461e-11
ENSRNOG00000026293	Jun	-0.646511	7.85806e-05	0.00253228
ENSRNOG00000026302	Lrrn4cl	-0.65665	0.000200596	0.00548226
ENSRNOG00000026519	AABR07044711.1	0.58834	0.000282008	0.00731096
ENSRNOG00000026605	Ifi27l2b	-0.731699	1.92411e-05	0.000762991
ENSRNOG00000026793	Nt5dc3	0.850059	7.42647e-09	5.66057e-07
ENSRNOG00000027024	Rgs16	-1.23565	1.52122e-09	1.29091e-07
ENSRNOG00000027066	Stk32a	-1.35253	3.58021e-06	0.000166932
ENSRNOG00000027089	Ell2	1.23305	7.26871e-17	1.32176e-14
ENSRNOG00000027839	Ptk2b	0.64561	0.000241727	0.00642368
ENSRNOG00000027936	Ccdc8	-0.863526	9.64824e-07	5.13859e-05
ENSRNOG00000028015	Pf4	-0.929892	2.44751e-05	0.000929657
ENSRNOG00000028041	Tnnt1	-2.19701	4.49603e-31	3.0121e-28
ENSRNOG00000028616	Pck1	-3.44815	4.58275e-69	1.16668e-65
ENSRNOG00000028768	Gbp4	-0.945364	0.000512709	0.0118659
ENSRNOG00000028837	AC128207.1	-1.64415	1.24418e-27	6.5988e-25
ENSRNOG00000028844	Slc9a5	0.772468	0.00180859	0.0319744
ENSRNOG00000028974	AABR07004894.1	-1.17163	2.7342e-07	1.64946e-05
ENSRNOG00000028982	Mrgprb3	-0.885573	0.00245917	0.0403907
ENSRNOG00000029079	Hspb7	-0.765029	2.20773e-05	0.000851581
ENSRNOG00000029543	Cish	-2.31881	5.80135e-23	2.23774e-20
ENSRNOG00000029598	Robo2	-0.813824	0.00205407	0.0353257
ENSRNOG00000029644	Clec2l	-0.863922	0.00012197	0.00362747
ENSRNOG00000029745	AABR07002677.1	1.61207	9.09083e-12	1.03319e-09
ENSRNOG00000029778	Maob	-0.688517	0.00122409	0.0233901
ENSRNOG00000029886	Hba-a1	-0.643964	0.000368176	0.00906483
ENSRNOG00000029980	Zbtb16	1.10885	3.67542e-14	5.56957e-12
ENSRNOG00000030021	Ccl6	-0.871391	2.1807e-08	1.56973e-06
ENSRNOG00000030389	Lrrc30	1.23195	2.5173e-16	4.38941e-14
ENSRNOG00000030449	Gsta4	-1.26186	2.56075e-06	0.000123003
ENSRNOG00000030462	Ostn	1.0727	4.22358e-12	5.07188e-10
ENSRNOG00000030478	AY172581.9	-15.4894	0	0
ENSRNOG00000030515	Nfasc	0.826197	5.99688e-05	0.00201942
ENSRNOG00000030700	Mt-cox3	1.33963	2.53028e-08	1.80944e-06
ENSRNOG00000030721	Fbrsl1	0.638226	7.94711e-05	0.00255257
ENSRNOG00000030726	Asgr2	-0.674283	0.00122564	0.0233901
ENSRNOG00000030729	C4b	-1.0579	1.19856e-10	1.15579e-08
ENSRNOG00000030743	Myog	-1.00564	7.79561e-12	8.93967e-10
ENSRNOG00000030763	Dpp4	-0.953887	1.47871e-06	7.46925e-05
ENSRNOG00000030848	Myl2	-1.99897	8.77241e-34	7.976e-31
ENSRNOG00000031162	Ccl24	-0.77126	0.000280352	0.00728285
ENSRNOG00000031244	AABR07031208.1	-1.54513	1.95185e-17	3.82233e-15
ENSRNOG00000031333	AY172581.10	0.70393	3.74957e-05	0.00134068
ENSRNOG00000031391	Ceacam16	-1.35214	9.44568e-06	0.000402121
ENSRNOG00000031440	Nova1	-0.727738	0.000384502	0.00934033
ENSRNOG00000031515	Klra2	-1.03957	8.75658e-05	0.00276582
ENSRNOG00000031739	Fam71e1	0.957631	0.000344412	0.00856253
ENSRNOG00000031855	Actr3b	-1.1234	2.82741e-07	1.67396e-05
ENSRNOG00000032133	Rnase2	-2.12783	1.50191e-11	1.66242e-09
ENSRNOG00000032844	RT1-Da	-0.677067	3.02078e-06	0.000142942
ENSRNOG00000032917	Zfand2a	-0.951308	5.82319e-09	4.57552e-07
ENSRNOG00000032941	Mab21l1	0.713357	0.000319136	0.00807611
ENSRNOG00000032994	Myom3	-1.96857	4.35285e-35	4.61728e-32
ENSRNOG00000033299	Mt-atp8	-11.4095	1.47846e-165	9.40964e-162
ENSRNOG00000033397	Adamts20	-0.760262	2.60474e-06	0.000124646
ENSRNOG00000033564	Cfd	-1.75018	1.49762e-29	9.07773e-27
ENSRNOG00000033653	Mpp3	1.50904	7.80956e-24	3.20671e-21
ENSRNOG00000033736	LOC102554678	-1.14786	1.16597e-05	0.000485021
ENSRNOG00000034037	Zfp266	0.625329	1.80946e-05	0.000724295
ENSRNOG00000034075	Ube2ql1	-0.824089	3.41604e-05	0.00124237
ENSRNOG00000034228	Pik3c2g	-1.74375	3.46936e-11	3.56141e-09
ENSRNOG00000036677	Slc16a3	1.13153	4.10995e-11	4.15203e-09
ENSRNOG00000036690	Ppp1r27	-0.86197	7.50681e-08	4.97678e-06
ENSRNOG00000036833	Zfp385a	-1.32633	6.66987e-19	1.6019e-16
ENSRNOG00000037563	Cd68	-0.635342	0.00159245	0.0287931
ENSRNOG00000037645	Tceal7	-0.590987	0.000390067	0.00943947
ENSRNOG00000039473	Ccdc152	-0.718545	0.000780556	0.0166149
ENSRNOG00000039856	Lrrc73	1.00306	0.000545125	0.0123909
ENSRNOG00000040208	Mmp27	-1.43199	5.77926e-08	3.91299e-06
ENSRNOG00000040287	Cyp1b1	-0.713684	0.000978675	0.0198053
ENSRNOG00000042179	Cfap20	-0.589814	0.00122785	0.0233972
ENSRNOG00000042317	Cd209f	-1.19861	0.000258206	0.00677134
ENSRNOG00000042536	Pde4d	1.36954	8.98167e-19	2.07869e-16
ENSRNOG00000042592	Rgs10	-0.745165	0.000357561	0.00883765
ENSRNOG00000042897	Nmrk2	0.991788	7.33781e-11	7.13e-09
ENSRNOG00000042927	Sbk3	-2.41337	5.09053e-16	8.7564e-14
ENSRNOG00000042980	Adam19	0.615271	7.20474e-05	0.00233952
ENSRNOG00000043098	Mt2A	0.897097	8.08745e-09	6.12769e-07
ENSRNOG00000043304	Apcdd1	-0.657088	0.000378992	0.00925863
ENSRNOG00000045636	Fasn	-0.957807	2.46314e-10	2.33722e-08
ENSRNOG00000045649	Arrdc3	-1.33611	8.70406e-20	2.17243e-17
ENSRNOG00000045797	Lep	-2.414	1.55148e-32	1.2343e-29
ENSRNOG00000045821	Slc41a3	1.08289	1.68175e-13	2.22989e-11
ENSRNOG00000045831	LOC100909784	-1.48188	5.34211e-18	1.13333e-15
ENSRNOG00000045843	Rusc2	-0.964884	4.14295e-11	4.15241e-09
ENSRNOG00000046155	LOC498675	-0.817957	0.00290369	0.0456475
ENSRNOG00000046254	Adgre1	-0.633206	0.00248495	0.0407091
ENSRNOG00000046261	Acp5	-0.88186	0.000719941	0.0156652
ENSRNOG00000046276	Myh3	-0.617461	3.57101e-05	0.00128405
ENSRNOG00000046283	Tmem41a	0.763324	4.21261e-07	2.40459e-05
ENSRNOG00000046333	Ablim1	-0.626233	1.8851e-05	0.000751845
ENSRNOG00000046667	Fosb	-1.8572	1.56924e-11	1.72197e-09
ENSRNOG00000046699	Slpi	-1.19116	7.74218e-06	0.000338661
ENSRNOG00000046858	Arxes2	-0.915635	0.00184413	0.0324674
ENSRNOG00000046949	Kcnb1	-0.619144	0.000635046	0.0141073
ENSRNOG00000047046	Plin4	0.743598	1.0609e-05	0.00044717
ENSRNOG00000047098	LOC103694855	-0.627779	3.84357e-05	0.00136281
ENSRNOG00000047236	AABR07008066.2	1.10857	8.07684e-08	5.27231e-06
ENSRNOG00000047276	LOC100362738	0.636803	0.000186064	0.00513755
ENSRNOG00000047321	Hba-a2	-0.624713	0.000311442	0.00794459
ENSRNOG00000047531	Ccdc57	0.822458	1.55948e-06	7.75416e-05
ENSRNOG00000047557	LOC103690996	-0.651179	8.56277e-06	0.000369476
ENSRNOG00000047657	C4a	-1.05567	2.14127e-11	2.23412e-09
ENSRNOG00000048050	Tmem120b	0.79332	2.22717e-06	0.00010862
ENSRNOG00000048130	LOC100911725	0.83833	4.36027e-05	0.0015206
ENSRNOG00000048273	Apod	-0.649067	4.26143e-05	0.00149021
ENSRNOG00000048363	Dnah5	-1.30804	3.28644e-08	2.32406e-06
ENSRNOG00000048472	Comp	-1.47384	2.66391e-09	2.20188e-07
ENSRNOG00000048812	Gpx1	-0.60584	0.000209717	0.00569188
ENSRNOG00000049054	Ntsr2	1.5412	2.72981e-09	2.24179e-07
ENSRNOG00000049530	AABR07012054.1	-0.667458	0.00159009	0.0287913
ENSRNOG00000049536	Rpl35a	-0.650616	8.73749e-06	0.000375742
ENSRNOG00000049639	LOC100909784	-1.46643	5.83254e-18	1.21709e-15
ENSRNOG00000049743	Gstm5	-0.623982	8.37929e-05	0.00266689
ENSRNOG00000049771	Gstt1	-1.15212	6.44773e-05	0.00215415
ENSRNOG00000050869	Cebpd	-0.831492	1.43869e-08	1.06472e-06
ENSRNOG00000050946	Fam110a	-0.813128	0.003164	0.0487585
ENSRNOG00000051232	Gbe1	-0.782747	4.73114e-07	2.66472e-05
ENSRNOG00000051235	C2	-0.9056	8.17866e-10	7.08205e-08
ENSRNOG00000051429	AABR07046669.1	0.590291	0.000258534	0.00677134
ENSRNOG00000051487	Kremen1	-0.619547	2.24802e-05	0.000864504
ENSRNOG00000051615	LOC100360316	-0.659617	1.8901e-05	0.000751845
ENSRNOG00000051619	Asb2	0.724534	6.87485e-05	0.00226666
ENSRNOG00000051993	Gdf10	-0.743144	0.000956727	0.0194229
ENSRNOG00000052016	LOC102546391	-2.03651	5.59977e-26	2.85118e-23
ENSRNOG00000052070	Aldh1a3	-0.802212	0.000320221	0.0080875
ENSRNOG00000052141	Rps10l1	-0.590657	0.00191456	0.0334758
ENSRNOG00000052219	Gm2a	-0.79061	7.14466e-08	4.76149e-06
ENSRNOG00000052415	Gstt2	-0.884628	2.69869e-06	0.000128658
ENSRNOG00000052424	AABR07036608.1	0.737681	1.54891e-06	7.73181e-05
ENSRNOG00000052564	Gpx3	-0.611478	0.000285624	0.00734073
ENSRNOG00000052707	Cacna1a	0.626033	0.000435296	0.0103568
ENSRNOG00000052758	Fam49a	0.972616	3.7786e-11	3.84783e-09
ENSRNOG00000053122	Scn1a	-1.71734	1.68297e-16	2.97535e-14
ENSRNOG00000053239	Clmp	-0.678186	2.11673e-05	0.000823972
ENSRNOG00000053384	Bmp7	-1.1009	8.29852e-05	0.00265407
ENSRNOG00000053400	Cfi	-1.17921	2.18793e-05	0.000849091
ENSRNOG00000053430	Slco4a1	2.01464	5.05731e-14	7.4854e-12
ENSRNOG00000053494	Mcpt1l1	-0.703417	8.82977e-06	0.000378431
ENSRNOG00000053848	LOC102552344	0.75184	0.00149693	0.0273377
ENSRNOG00000053884	NEWGENE_1564605	0.876714	0.00184854	0.0325001
ENSRNOG00000053893	Opn4	0.904115	0.00175736	0.0311553
ENSRNOG00000053904	AABR07022113.1	1.10518	9.98207e-14	1.36626e-11
ENSRNOG00000054204	Gria2	-0.965687	0.000709034	0.0154808
ENSRNOG00000054957	Sfrp4	-0.960651	2.55402e-10	2.373e-08
ENSRNOG00000055259	Phldb3	1.24329	8.23314e-07	4.44066e-05
ENSRNOG00000055401	Kcnc1	0.787535	1.90218e-06	9.34857e-05
ENSRNOG00000055751	P3h2	-0.799725	0.000268123	0.00697944
ENSRNOG00000055811	AABR07030501.1	1.03768	4.15587e-10	3.75178e-08
ENSRNOG00000056257	Cacng7	0.901253	1.41929e-06	7.22645e-05
ENSRNOG00000056446	Endou	-1.08435	4.30823e-08	3.01316e-06
ENSRNOG00000056457	Gpd1	0.656422	0.000542851	0.0123613
ENSRNOG00000056580	En1	1.76212	2.15703e-17	4.09804e-15
ENSRNOG00000057078	Ddit4	-0.67963	3.74294e-06	0.00017341
ENSRNOG00000057517	Rn60_X_0772.2	-1.00267	0.00023352	0.00623159
ENSRNOG00000057803	AABR07065445.1	0.669043	7.52594e-06	0.000332631
ENSRNOG00000058003	Spon1	0.589594	0.00225638	0.0376922
ENSRNOG00000058006	Sncg	-1.42256	3.89038e-21	1.10046e-18
ENSRNOG00000058105	Hbb	-0.608345	0.000453664	0.0107137
ENSRNOG00000058329	Prrx2	-0.913878	0.00158094	0.0286663
ENSRNOG00000058388	Zfp36	-0.881502	1.63844e-09	1.38117e-07
ENSRNOG00000058522	Fam214a	-0.621705	2.09134e-05	0.000816583
ENSRNOG00000058566	LOC103694381	0.920234	5.33358e-07	2.9908e-05
ENSRNOG00000058827	Six2	0.931921	1.42737e-08	1.06251e-06
ENSRNOG00000059140	Myo1g	-0.896406	0.00135461	0.0253944
ENSRNOG00000059406	Ier5	-1.27652	4.70051e-12	5.59185e-10
ENSRNOG00000059491	Fgd4	0.780966	0.000237988	0.00633756
ENSRNOG00000059579	Gpt2	0.808983	5.80189e-07	3.23913e-05
ENSRNOG00000059834	Cib2	0.592379	5.23888e-05	0.00177828
ENSRNOG00000059857	Rnd1	-0.751228	0.000418365	0.00999131
ENSRNOG00000059870	LOC100909443	0.740081	0.0020668	0.0353968
ENSRNOG00000061231	Selm	-0.601042	0.000382668	0.00931355
ENSRNOG00000061299	LOC103694857	-0.719155	3.52184e-06	0.000164814
ENSRNOG00000061610	AABR07044148.1	2.12426	7.36591e-14	1.06546e-11
ENSRNOG00000061925	AABR07059159.1	-0.839818	0.00260515	0.0422245
ENSRNOG00000062049	Rn60_10_0923.1	0.744238	0.00310051	0.0479543
ENSRNOG00000062144	AABR07035955.1	-0.999246	2.01585e-05	0.000796888
