# Supplementary material for: Transcriptomic Responses of Skeletal Muscle to Acute Exercise in Diabetic Goto-Kakizaki Rats
Source: Front Physiol. 2019 Jul 9;10:872. doi: 10.3389/fphys.2019.00872 (PMC6629899; doi:10.3389/fphys.2019.00872)
Supplement: TABLE S3 — The GO and KEGG pathway enrichment analysis of three comparisons. [file Table_3.XLSX]

## Sheet: GK.GO
#GO enrichment analysis of differentially expressed genes in the GK vs. Wistar comparison
ONTOLOGY	ID	Description	GeneRatio	BgRatio	p.adjust	geneID	Count
BP	GO:0044282	small molecule catabolic process	31/628	332/17943	0.00356383	Crabp1/Acad11/Cyp27a1/Bcat2/Crot/Aldh2/Rbks/Ehhadh/Gstz1/Esd/Tp53/Bckdha/Plin5/Lpin1/Ada/Etfbkmt/Cyp26b1/Ldha/Bcat1/Pon3/Haghl/Fabp3/Fgf2/Ntsr1/Eno2/Hyal1/LOC100911625/Irs2/Akr1c3/Lep/Bad	31
BP	GO:0030522	intracellular receptor signaling pathway	24/628	230/17943	0.00415692	Cited2/Gper1/Srebf1/Fabp5/Ptgis/Vdr/Irgm/Nr1d2/Ripk2/Plin5/Cyp26b1/Dnaja1/Crem/Tbx1/Arntl/Padi2/Nr4a2/Akr1c3/Lep/Hspa1a/Hspa1b/Alox15/Nr5a1/Nr4a3	24
BP	GO:0090287	regulation of cellular response to growth factor stimulus	26/628	270/17943	0.00415692	Nepn/Ccbe1/Cited2/Fbn2/Adamts3/Npnt/Eid2/Fam20c/Vegfb/Ulk1/Tp53/Spry1/Fzd4/Smad3/Pdpk1/Sfrp5/Aspn/Dll1/Agt/Apln/Fgf2/Skil/Cadm4/Adamtsl2/Hspa1a/Hspa1b	26
BP	GO:0006631	fatty acid metabolic process	32/628	379/17943	0.00415692	Ephx2/Lipg/Acsf2/Acad11/Tecrl/Srebf1/Fabp5/Ptgis/Crot/Nfe2l1/Ehhadh/Cygb/Acsl4/Gstp1/Plin5/Lpin1/Etfbkmt/Acad9/Asah2/Crem/Fasn/Aacs/Agt/Fabp3/Slc27a1/Irs2/Cyp1b1/Akr1c3/Lep/Plp1/Alox15/Nr4a3	32
BP	GO:0001916	positive regulation of T cell mediated cytotoxicity	9/628	38/17943	0.00415692	Cd1d1/RT1-N2/RT1-CE10/LOC100364500/RT1-A2/RT1-N3/Hspa1a/RT1-A1/RT1-CE16	9
BP	GO:0002486	antigen processing and presentation of endogenous peptide antigen via MHC class I via ER pathway, TAP-independent	7/628	22/17943	0.00415692	RT1-N2/RT1-CE10/LOC100364500/RT1-A2/RT1-N3/RT1-A1/RT1-CE16	7
BP	GO:0035358	regulation of peroxisome proliferator activated receptor signaling pathway	6/628	15/17943	0.00415692	Cited2/Fabp5/Ptgis/Plin5/Lep/Alox15	6
BP	GO:0071384	cellular response to corticosteroid stimulus	16/628	125/17943	0.00415692	Fbxo32/Rpl32/Gper1/Trim63/Cacna1g/Serpine1/RT1-Ba/Mettl21c/Igf1r/Ephx1/Gstp1/Abcb1a/Cyp1b1/Akr1c3/Myod1/Crhr2	16
BP	GO:0097237	cellular response to toxic substance	27/628	302/17943	0.00415692	Met/Tp53inp1/Mgst2/Serpine1/Nol3/Gstm5/Net1/Cygb/Esd/Tp53/Gstt2/Gstp1/Sesn1/Txn1/Kcnj11/Abcb1a/Dnmt3a/Smpd3/Hmox1/Hba-a1/Hba-a2/Cyp1b1/Glrx/Hbb/Bad/Nr4a3/Lcn2	27
BP	GO:0002484	antigen processing and presentation of endogenous peptide antigen via MHC class I via ER pathway	7/628	23/17943	0.00415692	RT1-N2/RT1-CE10/LOC100364500/RT1-A2/RT1-N3/RT1-A1/RT1-CE16	7
BP	GO:0060538	skeletal muscle organ development	22/628	219/17943	0.00415692	Cited2/Ankrd1/Sap30/Met/Hoxd10/Mettl21c/Nr1d2/Scx/Kcnab1/Hoxd9/Myh14/Megf10/Cntfr/Atf3/Cyp26b1/Dll1/Tbx1/Erbb3/Arntl/Skil/Myod1/Crhr2	22
BP	GO:0019883	antigen processing and presentation of endogenous antigen	8/628	32/17943	0.00437081	Cd1d1/RT1-N2/RT1-CE10/LOC100364500/RT1-A2/RT1-N3/RT1-A1/RT1-CE16	8
BP	GO:0007519	skeletal muscle tissue development	21/628	207/17943	0.00480563	Cited2/Ankrd1/Sap30/Met/Hoxd10/Mettl21c/Nr1d2/Scx/Kcnab1/Hoxd9/Myh14/Megf10/Atf3/Cyp26b1/Dll1/Tbx1/Erbb3/Arntl/Skil/Myod1/Crhr2	21
BP	GO:0001914	regulation of T cell mediated cytotoxicity	9/628	44/17943	0.00613257	Cd1d1/RT1-N2/RT1-CE10/LOC100364500/RT1-A2/RT1-N3/Hspa1a/RT1-A1/RT1-CE16	9
BP	GO:0002475	antigen processing and presentation via MHC class Ib	7/628	26/17943	0.00744028	Cd1d1/RT1-N2/RT1-CE10/RT1-A2/RT1-N3/RT1-A1/RT1-CE16	7
BP	GO:0006749	glutathione metabolic process	10/628	58/17943	0.00808058	Chac1/Gstt3/Mgst2/Gstm5/Nfe2l1/Gstz1/Gstt2/Gstp1/Gstm4/Hbb	10
BP	GO:0048662	negative regulation of smooth muscle cell proliferation	10/628	58/17943	0.00808058	Gper1/Il15/Tp53/Gstp1/Ndrg4/Hmox1/Npr1/Apln/Apod/Npr3	10
BP	GO:0071383	cellular response to steroid hormone stimulus	25/628	288/17943	0.00808058	Nr1d1/Fbxo32/Rpl32/Gper1/Trim63/Cacna1g/Serpine1/RT1-Ba/Vdr/Mettl21c/Nr1d2/Igf1r/Ephx1/Gstp1/Abcb1a/Dnaja1/Arntl/Padi2/Nr4a2/Cyp1b1/Akr1c3/Myod1/Crhr2/Nr5a1/Nr4a3	25
BP	GO:0000302	response to reactive oxygen species	25/628	295/17943	0.0101509	Met/Serpine1/Nol3/Net1/Tp53/Gstp1/Sesn1/Txn1/Ada/Smpd3/Ldha/Hmox1/Dpep1/Hyal1/Hba-a2/Apod/Ptprn/Cyp1b1/Akr1c3/Glrx/Slc4a1/Hbb/Bad/Nr4a3/Lcn2	25
BP	GO:0007584	response to nutrient	29/628	371/17943	0.0101509	Lipg/Tnc/Stc2/Panx1/Serpine1/Vdr/Il15/Igf1r/Acsl4/Tp53/Bckdha/Gstp1/Kcnj11/Ada/Abcb1a/Dnmt3a/Cyp26b1/Ldha/Hmox1/Aacs/Bdh1/Gdap1/Cyp1b1/Akr1c3/Spp1/Cp/Glrx/Lep/Crym	29
BP	GO:0033002	muscle cell proliferation	22/628	245/17943	0.0101509	Cited2/Gper1/Hey2/Nol3/Il15/Igf1r/Tp53/Gstp1/Ndrg4/Megf10/Il6r/Smpd3/Hmox1/Pde4d/Npr1/Agt/Apln/Fgf2/Apod/Cxadr/Npr3/Nr4a3	22
BP	GO:0002711	positive regulation of T cell mediated immunity	10/628	62/17943	0.0101509	Cd1d1/RT1-N2/RT1-CE10/LOC100364500/RT1-A2/Cd24/RT1-N3/Hspa1a/RT1-A1/RT1-CE16	10
BP	GO:0034764	positive regulation of transmembrane transport	22/628	246/17943	0.0101509	Gper1/Met/Klf15/Jph2/Kcnj11/Abcb1a/Pdpk1/Kcnc1/Arc/Agt/Lrrc38/Slc9a3r1/Erbb3/Ntsr1/Irs2/Calcr/Glrx/Rnf207/Clip3/Ak1/Cxcl9/Nr4a3	22
BP	GO:0045444	fat cell differentiation	22/628	246/17943	0.0101509	Nr1d1/Dlk1/Gper1/Selenbp1/Tmem64/Srebf1/Bbs9/Medag/Lpin1/Sh2b2/Smad3/Arid5b/Aacs/Zfp385a/Arntl/Nr4a2/Pex11a/Lamb3/Lep/Clip3/Mmp11/Nr4a3	22
BP	GO:0048659	smooth muscle cell proliferation	18/628	179/17943	0.0101509	Gper1/Nol3/Il15/Igf1r/Tp53/Gstp1/Ndrg4/Il6r/Smpd3/Hmox1/Pde4d/Npr1/Agt/Apln/Fgf2/Apod/Npr3/Nr4a3	18
BP	GO:0031214	biomineral tissue development	17/628	163/17943	0.0101509	Dlk1/Omd/Fbn2/LOC103690116/Comp/Hey2/Tmem119/Fam20c/Smad3/Aspn/Smpd3/Fgr/Tbx1/Osr2/Spp1/Lep/Alox15	17
BP	GO:0014874	response to stimulus involved in regulation of muscle adaptation	6/628	21/17943	0.0101509	Fbxo32/Prkag3/Trim63/Nol3/Runx1/Agt	6
BP	GO:0002483	antigen processing and presentation of endogenous peptide antigen	7/628	30/17943	0.0101509	RT1-N2/RT1-CE10/LOC100364500/RT1-A2/RT1-N3/RT1-A1/RT1-CE16	7
BP	GO:0019885	antigen processing and presentation of endogenous peptide antigen via MHC class I	7/628	30/17943	0.0101509	RT1-N2/RT1-CE10/LOC100364500/RT1-A2/RT1-N3/RT1-A1/RT1-CE16	7
BP	GO:0071385	cellular response to glucocorticoid stimulus	14/628	118/17943	0.0101509	Fbxo32/Rpl32/Trim63/Cacna1g/Serpine1/RT1-Ba/Mettl21c/Igf1r/Ephx1/Gstp1/Abcb1a/Cyp1b1/Myod1/Crhr2	14
BP	GO:0031960	response to corticosteroid	26/628	321/17943	0.0101509	Fbxo32/Rpl32/Gper1/Trim63/Cacna1g/Junb/Serpine1/RT1-Ba/Mettl21c/Igf1r/Ephx1/Bckdha/Gstp1/Txn1/Il6r/Abcb1a/C1qb/Grik4/Bdh1/Aqp4/Calcr/Cyp1b1/Akr1c3/Myod1/Crhr2/Bad	26
BP	GO:0006575	cellular modified amino acid metabolic process	18/628	181/17943	0.0101509	Chac1/Gstt3/Mthfd2/Mgst2/Crot/Gstm5/Egln3/Nfe2l1/Gstz1/Gstt2/Gstp1/Plod1/Carns1/Slc27a1/Gstm4/Hbb/Slco4a1/Crym	18
BP	GO:0002474	antigen processing and presentation of peptide antigen via MHC class I	8/628	41/17943	0.0101509	RT1-N2/RT1-CE10/LOC100364500/RT1-A2/Tapbpl/RT1-N3/RT1-A1/RT1-CE16	8
BP	GO:0003012	muscle system process	31/628	418/17943	0.0101509	Fbxo32/Gper1/Comp/Met/Npnt/Trim63/Cacna1g/Hey2/Klf15/Gaa/Nol3/Scn1a/Vegfb/Il15/Myh14/Ada/Smad3/Myh3/Col14a1/Slc8a3/Ednrb/Smpd3/Pde4d/Agt/Hsp90aa1/Pde4b/Lep/Rnf207/Myod1/Atp1a3/Nr4a3	31
BP	GO:0019318	hexose metabolic process	21/628	233/17943	0.0101509	Nr1d1/Pfkfb3/LOC100911725/Pfkfb4/Fabp5/Nfe2l1/Ppp1r3d/Tp53/Kcnj11/Ppp1r3c/Atf3/Sik1/Ldha/Crem/Eno2/LOC100911625/Irs2/Apod/Fbp2/Lep/Bad	21
BP	GO:0033687	osteoblast proliferation	7/628	31/17943	0.0101509	Cthrc1/Junb/Tmem119/Igf1r/Smad3/Osr2/Npr3	7
BP	GO:0006869	lipid transport	27/628	343/17943	0.0101509	Pla2g2a/Lipg/Pla2g5/Slco3a1/Lbp/Stard3/Crot/Runx1/Acsl4/Tp53/Fzd4/Abcb1a/Gpihbp1/Abcg1/Atp8b1/Msr1/Agt/Apold1/Fabp3/Apol9a/Ntsr1/Slc27a1/Irs2/Apod/Spp1/Lep/Pla2g2d	27
BP	GO:0002476	antigen processing and presentation of endogenous peptide antigen via MHC class Ib	6/628	22/17943	0.0101509	RT1-N2/RT1-CE10/RT1-A2/RT1-N3/RT1-A1/RT1-CE16	6
BP	GO:0035357	peroxisome proliferator activated receptor signaling pathway	6/628	22/17943	0.0101509	Cited2/Fabp5/Ptgis/Plin5/Lep/Alox15	6
BP	GO:0017015	regulation of transforming growth factor beta receptor signaling pathway	13/628	106/17943	0.0101509	Nepn/Cited2/Fbn2/Npnt/Eid2/Tp53/Smad3/Pdpk1/Aspn/Skil/Adamtsl2/Hspa1a/Hspa1b	13
BP	GO:0030282	bone mineralization	14/628	121/17943	0.0101509	Dlk1/Omd/Fbn2/LOC103690116/Comp/Tmem119/Fam20c/Smad3/Aspn/Smpd3/Fgr/Osr2/Lep/Alox15	14
BP	GO:0048511	rhythmic process	29/628	383/17943	0.0101509	Nr1d1/Ciart/Dbp/Bhlhe41/Srebf1/Btbd9/Runx1/Nr1d2/Igf1r/Tp53/Fzd4/Ada/Abcb1a/Sik1/Mat2a/Crem/Gpr157/Agt/Prkcg/Erbb3/Arntl/Top2a/Ptprn/Cyp1b1/Glrx/Lep/Nfil3/Slc4a1/Nr5a1	29
BP	GO:0030512	negative regulation of transforming growth factor beta receptor signaling pathway	10/628	66/17943	0.0104797	Nepn/Fbn2/Eid2/Tp53/Pdpk1/Aspn/Skil/Adamtsl2/Hspa1a/Hspa1b	10
BP	GO:0046394	carboxylic acid biosynthetic process	28/628	367/17943	0.0109314	Nr1d1/Lipg/Pfkfb3/Prkag3/Pla2g5/Tecrl/Cyp27a1/Mgst2/Fabp5/Bcat2/Ptgis/Tp53/Plod1/Asah2/Smpd3/Ldha/Carns1/Bcat1/Uros/Fasn/Agt/Eno2/Hyal1/LOC100911625/Akr1c3/Plp1/Slc4a1/Alox15	28
BP	GO:1903844	regulation of cellular response to transforming growth factor beta stimulus	13/628	108/17943	0.0109314	Nepn/Cited2/Fbn2/Npnt/Eid2/Tp53/Smad3/Pdpk1/Aspn/Skil/Adamtsl2/Hspa1a/Hspa1b	13
BP	GO:0035914	skeletal muscle cell differentiation	11/628	80/17943	0.0109314	Cited2/Ankrd1/Sap30/Nr1d2/Scx/Megf10/Atf3/Cyp26b1/Tbx1/Arntl/Myod1	11
BP	GO:0015908	fatty acid transport	12/628	94/17943	0.0109314	Pla2g2a/Pla2g5/Slco3a1/Crot/Acsl4/Tp53/Fabp3/Ntsr1/Slc27a1/Irs2/Lep/Pla2g2d	12
BP	GO:0002428	antigen processing and presentation of peptide antigen via MHC class Ib	6/628	23/17943	0.0109314	RT1-N2/RT1-CE10/RT1-A2/RT1-N3/RT1-A1/RT1-CE16	6
BP	GO:0016053	organic acid biosynthetic process	28/628	369/17943	0.0109314	Nr1d1/Lipg/Pfkfb3/Prkag3/Pla2g5/Tecrl/Cyp27a1/Mgst2/Fabp5/Bcat2/Ptgis/Tp53/Plod1/Asah2/Smpd3/Ldha/Carns1/Bcat1/Uros/Fasn/Agt/Eno2/Hyal1/LOC100911625/Akr1c3/Plp1/Slc4a1/Alox15	28
BP	GO:0030199	collagen fibril organization	9/628	55/17943	0.0109314	Comp/P3h4/Scx/Fmod/Adamts14/Plod1/Col14a1/Cyp1b1/Mmp11	9
BP	GO:0043062	extracellular structure organization	25/628	313/17943	0.0110164	Nepn/Lipg/Pla2g5/Comp/Npnt/Col22a1/Mmp27/P3h4/Scx/Fmod/Adamts14/Smad3/Plod1/Col14a1/Abcg1/Aplp1/Smpd3/Agt/Hyal1/Lamb3/Cyp1b1/Adamts9/Col24a1/Adamtsl2/Mmp11	25
BP	GO:1903845	negative regulation of cellular response to transforming growth factor beta stimulus	10/628	68/17943	0.0112164	Nepn/Fbn2/Eid2/Tp53/Pdpk1/Aspn/Skil/Adamtsl2/Hspa1a/Hspa1b	10
BP	GO:0048660	regulation of smooth muscle cell proliferation	17/628	173/17943	0.0114761	Gper1/Il15/Igf1r/Tp53/Gstp1/Ndrg4/Il6r/Smpd3/Hmox1/Pde4d/Npr1/Agt/Apln/Fgf2/Apod/Npr3/Nr4a3	17
BP	GO:0014706	striated muscle tissue development	32/628	451/17943	0.0117546	Cited2/Ankrd1/Sap30/Met/Fhl2/Hey2/Hoxd10/Mettl21c/Nr1d2/Scx/Kcnab1/Hoxd9/Myh14/Megf10/Jph2/Smad3/Atf3/Col14a1/Sik1/Cyp26b1/Tbx3/Dll1/Agt/Tbx1/Erbb3/Fgf2/Arntl/Skil/Cxadr/Adamts9/Myod1/Crhr2	32
BP	GO:0019216	regulation of lipid metabolic process	27/628	354/17943	0.011938	Ephx2/Nr1d1/Ccl21/Gper1/Srebf1/Fabp5/Vdr/Nr1d2/Igf1r/Nfe2l1/Pik3ip1/Plin5/Etfbkmt/Sik1/Abcg1/Smpd3/Angptl4/Agt/Fgr/Fabp3/Fgf2/Slc27a1/Irs2/Apod/Akr1c3/Lep/Nr4a3	27
BP	GO:0008015	blood circulation	34/628	493/17943	0.012162	Ephx2/Gper1/Comp/Met/Cacna1g/Hey2/Srebf1/Ptgis/Gaa/Scn1a/Vegfb/Ada/Lnpep/Smad3/Ednrb/Nav2/Smpd3/Hmox1/Dll1/Pde4d/Npr1/Agt/Hsp90aa1/Apln/Ntsr1/Slc2a5/Cxadr/Pde4b/Lep/Rnf207/Npr3/Hspa1a/Crhr2/Atp1a3	34
BP	GO:0060537	muscle tissue development	33/628	474/17943	0.0125269	Cited2/Ankrd1/Sap30/Met/Fhl2/Hey2/Hoxd10/Zfand5/Mettl21c/Nr1d2/Scx/Kcnab1/Hoxd9/Myh14/Megf10/Jph2/Smad3/Atf3/Col14a1/Sik1/Cyp26b1/Tbx3/Dll1/Agt/Tbx1/Erbb3/Fgf2/Arntl/Skil/Cxadr/Adamts9/Myod1/Crhr2	33
BP	GO:0048705	skeletal system morphogenesis	22/628	263/17943	0.0127139	Cited2/Fbn2/Comp/Hoxd10/Tmem119/Zfand5/Hoxd4/Frem1/Chad/Scx/Hoxd9/Tulp3/Smad3/Arid5b/Col14a1/Cyp26b1/Smpd3/Ift140/Fgr/Tbx1/Hyal1/Osr2	22
BP	GO:0097191	extrinsic apoptotic signaling pathway	20/628	228/17943	0.0128432	Gper1/Serpine1/Nol3/Mllt11/Gstp1/Smad3/Pdpk1/Mal/Atf3/Hmox1/Agt/Bloc1s2/Erbb3/Skil/Hspa1a/Hspa1b/Scg2/Bad/G0s2/Lcn2	20
BP	GO:0006007	glucose catabolic process	5/628	16/17943	0.0128432	Tp53/Ldha/Eno2/LOC100911625/Bad	5
BP	GO:0007517	muscle organ development	30/628	417/17943	0.0128432	Cited2/Ankrd1/Sap30/Met/Hey2/Hoxd10/Mettl21c/Nr1d2/Scx/Kcnab1/Hoxd9/Myh14/Megf10/Cntfr/Jph2/Smad3/Arid5b/Atf3/Col14a1/Cyp26b1/Dll1/Tbx1/Erbb3/Fgf2/Arntl/Skil/Cxadr/Myod1/Crhr2/Ak1	30
BP	GO:0042542	response to hydrogen peroxide	18/628	194/17943	0.0128432	Met/Serpine1/Nol3/Net1/Tp53/Txn1/Ada/Smpd3/Ldha/Hmox1/Hba-a2/Cyp1b1/Glrx/Slc4a1/Hbb/Bad/Nr4a3/Lcn2	18
BP	GO:0010876	lipid localization	28/628	378/17943	0.0128432	Pla2g2a/Lipg/Pla2g5/Slco3a1/Lbp/Stard3/Crot/Runx1/Acsl4/Tp53/Fzd4/Plin5/Abcb1a/Gpihbp1/Abcg1/Atp8b1/Msr1/Agt/Apold1/Fabp3/Apol9a/Ntsr1/Slc27a1/Irs2/Apod/Spp1/Lep/Pla2g2d	28
BP	GO:0005996	monosaccharide metabolic process	22/628	265/17943	0.0128432	Nr1d1/Pfkfb3/LOC100911725/Pfkfb4/Fabp5/Rbks/Nfe2l1/Ppp1r3d/Tp53/Kcnj11/Ppp1r3c/Atf3/Sik1/Ldha/Crem/Eno2/LOC100911625/Irs2/Apod/Fbp2/Lep/Bad	22
BP	GO:0034440	lipid oxidation	12/628	100/17943	0.0144064	Acad11/Crot/Ehhadh/Cygb/Plin5/Etfbkmt/Fabp3/Irs2/Apod/Lep/Alox15/Nr4a3	12
BP	GO:0015718	monocarboxylic acid transport	16/628	163/17943	0.0146252	Pla2g2a/Emb/Pla2g5/Slco3a1/Crot/Acsl4/Tp53/Slc38a3/Slc9a3r1/Fabp3/Apba1/Ntsr1/Slc27a1/Irs2/Lep/Pla2g2d	16
BP	GO:0009266	response to temperature stimulus	20/628	235/17943	0.0172531	Slc25a27/Tp53inp1/Cirbp/Nfe2l1/Hsf4/Tp53/Hspb7/Lrp11/Dnaja1/Hmox1/Agt/Hsp90aa1/LOC103692716/Cd14/Ntsr1/Slc27a1/Mki67/Pde4b/Hspa1a/Hspa1b	20
BP	GO:0098754	detoxification	13/628	118/17943	0.0179254	Tp53inp1/Mgst2/Gstm5/Cygb/Esd/Gstt2/Gstp1/Sesn1/Txn1/Pon3/Hba-a1/Hba-a2/Hbb	13
BP	GO:0001913	T cell mediated cytotoxicity	9/628	61/17943	0.0179304	Cd1d1/RT1-N2/RT1-CE10/LOC100364500/RT1-A2/RT1-N3/Hspa1a/RT1-A1/RT1-CE16	9
BP	GO:0048002	antigen processing and presentation of peptide antigen	9/628	62/17943	0.0200438	RT1-N2/RT1-CE10/LOC100364500/RT1-A2/RT1-Ba/Tapbpl/RT1-N3/RT1-A1/RT1-CE16	9
BP	GO:0007623	circadian rhythm	21/628	257/17943	0.0200438	Nr1d1/Ciart/Dbp/Bhlhe41/Srebf1/Btbd9/Nr1d2/Tp53/Ada/Abcb1a/Sik1/Mat2a/Crem/Gpr157/Prkcg/Erbb3/Arntl/Top2a/Lep/Nfil3/Slc4a1	21
BP	GO:0006006	glucose metabolic process	18/628	204/17943	0.0209212	Nr1d1/Fabp5/Nfe2l1/Ppp1r3d/Tp53/Kcnj11/Ppp1r3c/Atf3/Sik1/Ldha/Crem/Eno2/LOC100911625/Irs2/Apod/Fbp2/Lep/Bad	18
BP	GO:0045017	glycerolipid biosynthetic process	15/628	153/17943	0.021005	Pla2g5/Srebf1/Fabp5/Acsl4/Pgap2/Plin5/Lpin1/Sik1/Pik3c2g/Fabp3/Fgf2/Pgap3/Slc27a1/Pip5k1b/Alox15	15
BP	GO:0010827	regulation of glucose transmembrane transport	11/628	91/17943	0.0216483	Slc25a27/Ostn/Met/Klf15/Fabp5/Erbb3/Irs2/Lep/Clip3/Ak1/Nr4a3	11
BP	GO:0051384	response to glucocorticoid	23/628	297/17943	0.0216483	Fbxo32/Rpl32/Trim63/Cacna1g/Junb/Serpine1/RT1-Ba/Mettl21c/Igf1r/Ephx1/Bckdha/Gstp1/Txn1/Il6r/Abcb1a/C1qb/Bdh1/Aqp4/Calcr/Cyp1b1/Myod1/Crhr2/Bad	23
BP	GO:0008643	carbohydrate transport	15/628	154/17943	0.0216483	Slc25a27/Ostn/Met/Klf15/Fabp5/Abcb1a/Smpd3/Erbb3/Slc2a5/Irs2/Lep/Clip3/Aqp7/Ak1/Nr4a3	15
BP	GO:0046365	monosaccharide catabolic process	6/628	28/17943	0.0221549	Rbks/Tp53/Ldha/Eno2/LOC100911625/Bad	6
BP	GO:1990748	cellular detoxification	12/628	107/17943	0.0226613	Tp53inp1/Mgst2/Gstm5/Cygb/Esd/Gstt2/Gstp1/Sesn1/Txn1/Hba-a1/Hba-a2/Hbb	12
BP	GO:0060986	endocrine hormone secretion	9/628	64/17943	0.0226613	Runx1/Tp53/Fzd4/Tbx3/Agt/Fst/Apln/Lep/Crhr2	9
BP	GO:0006000	fructose metabolic process	4/628	11/17943	0.0245556	Pfkfb3/LOC100911725/Pfkfb4/Fbp2	4
BP	GO:1901615	organic hydroxy compound metabolic process	32/628	486/17943	0.0293327	Ephx2/Nr1d1/Gper1/Cyp27a1/Srebf1/Sncaip/Nudt10/Vdr/Btbd9/Aldh2/Ephx1/Tp53/Retsat/Abcg1/Asah2/Cyp26b1/Ldha/Atp8b1/Pnpo/Npr1/Haghl/Fgf2/Ntsr1/Nr4a2/Ch25h/Cyp1b1/Akr1c3/Lep/Crhr2/Slco4a1/Crym/Alox15	32
BP	GO:0071496	cellular response to external stimulus	29/628	425/17943	0.0293327	Ankrd1/Tnc/Gabarapl1/Srebf1/Serpine1/Vdr/Map3k14/Il15/Igf1r/Scx/Ulk1/Tp53/Gstp1/Sesn1/Abcb1a/Slc38a3/Atf3/Sik1/Ldha/Hmox1/Agt/Nr4a2/Gdap1/Nuak2/Akr1c3/Lep/Myod1/Bad/Lcn2	29
BP	GO:0016042	lipid catabolic process	23/628	306/17943	0.0293327	Crabp1/Pla2g2a/Lipg/Pla2g5/Acad11/Cyp27a1/Mgst2/Crot/Ehhadh/Pnpla7/Plin5/Lpin1/Etfbkmt/Asah2/Cyp26b1/Smpd3/Fabp3/Irs2/Cyp1b1/Akr1c3/Spp1/Lep/Pla2g2d	23
BP	GO:0002824	positive regulation of adaptive immune response based on somatic recombination of immune receptors built from immunoglobulin superfamily domains	13/628	127/17943	0.0293327	Cd1d1/RT1-N2/RT1-CE10/LOC100364500/RT1-A2/Cd24/Ripk2/RT1-N3/Il6r/Ada/Hspa1a/RT1-A1/RT1-CE16	13
BP	GO:0014889	muscle atrophy	5/628	20/17943	0.0293327	Fbxo32/Trim63/Nol3/Il15/Myod1	5
BP	GO:0018904	ether metabolic process	5/628	20/17943	0.0293327	Ephx2/Tmem86a/Ephx1/Txn1/Fasn	5
BP	GO:0030198	extracellular matrix organization	21/628	269/17943	0.0299481	Nepn/Comp/Npnt/Col22a1/Mmp27/P3h4/Scx/Fmod/Adamts14/Smad3/Plod1/Col14a1/Aplp1/Smpd3/Agt/Lamb3/Cyp1b1/Adamts9/Col24a1/Adamtsl2/Mmp11	21
BP	GO:0043618	regulation of transcription from RNA polymerase II promoter in response to stress	8/628	54/17943	0.0299481	Cited2/Hsf4/Tp53/Atf3/Dnajb1/Hmox1/Hspa1a/Hspa1b	8
BP	GO:0009408	response to heat	14/628	145/17943	0.0304824	Tp53inp1/Hsf4/Tp53/Hspb7/Lrp11/Dnaja1/Hmox1/Hsp90aa1/LOC103692716/Cd14/Mki67/Pde4b/Hspa1a/Hspa1b	14
BP	GO:0090288	negative regulation of cellular response to growth factor stimulus	14/628	145/17943	0.0304824	Nepn/Fbn2/Eid2/Tp53/Spry1/Pdpk1/Aspn/Agt/Apln/Skil/Cadm4/Adamtsl2/Hspa1a/Hspa1b	14
BP	GO:0010955	negative regulation of protein processing	7/628	42/17943	0.0304824	Chac1/Cd55/Cst7/Serpine1/Nol3/Birc3/Susd4	7
BP	GO:1903318	negative regulation of protein maturation	7/628	42/17943	0.0304824	Chac1/Cd55/Cst7/Serpine1/Nol3/Birc3/Susd4	7
BP	GO:0046884	follicle-stimulating hormone secretion	4/628	12/17943	0.0304824	Tbx3/Fst/Lep/Crhr2	4
BP	GO:0061635	regulation of protein complex stability	4/628	12/17943	0.0304824	Irgm/Sqstm1/Hsp90aa1/LOC103692716	4
BP	GO:0031668	cellular response to extracellular stimulus	23/628	310/17943	0.0308348	Tnc/Gabarapl1/Srebf1/Serpine1/Vdr/Il15/Ulk1/Tp53/Gstp1/Sesn1/Abcb1a/Slc38a3/Atf3/Sik1/Ldha/Hmox1/Nr4a2/Gdap1/Nuak2/Akr1c3/Lep/Myod1/Lcn2	23
BP	GO:0071715	icosanoid transport	8/628	55/17943	0.0308348	Pla2g2a/Pla2g5/Slco3a1/Acsl4/Tp53/Ntsr1/Lep/Pla2g2d	8
BP	GO:1901571	fatty acid derivative transport	8/628	55/17943	0.0308348	Pla2g2a/Pla2g5/Slco3a1/Acsl4/Tp53/Ntsr1/Lep/Pla2g2d	8
BP	GO:0019395	fatty acid oxidation	11/628	98/17943	0.0311943	Acad11/Crot/Ehhadh/Cygb/Plin5/Etfbkmt/Fabp3/Irs2/Lep/Alox15/Nr4a3	11
BP	GO:0090101	negative regulation of transmembrane receptor protein serine/threonine kinase signaling pathway	12/628	114/17943	0.0318447	Nepn/Fbn2/Eid2/Tp53/Pdpk1/Aspn/Fst/Igsf1/Skil/Adamtsl2/Hspa1a/Hspa1b	12
BP	GO:0001553	luteinization	5/628	21/17943	0.0318447	Runx1/Tp53/Fzd4/Ptprn/Nr5a1	5
BP	GO:0015669	gas transport	5/628	21/17943	0.0318447	Cygb/Hba-a1/Hba-a2/Aqp4/Hbb	5
BP	GO:0044242	cellular lipid catabolic process	17/628	200/17943	0.032541	Crabp1/Lipg/Acad11/Mgst2/Crot/Ehhadh/Plin5/Lpin1/Etfbkmt/Asah2/Cyp26b1/Smpd3/Fabp3/Irs2/Cyp1b1/Akr1c3/Lep	17
BP	GO:0002821	positive regulation of adaptive immune response	13/628	131/17943	0.032541	Cd1d1/RT1-N2/RT1-CE10/LOC100364500/RT1-A2/Cd24/Ripk2/RT1-N3/Il6r/Ada/Hspa1a/RT1-A1/RT1-CE16	13
BP	GO:0033280	response to vitamin D	8/628	56/17943	0.032541	Tnc/Stc2/Vdr/Il15/Abcb1a/Gdap1/Spp1/Crym	8
BP	GO:0072329	monocarboxylic acid catabolic process	12/628	115/17943	0.0325739	Crabp1/Acad11/Crot/Ehhadh/Plin5/Lpin1/Etfbkmt/Cyp26b1/Pon3/Fabp3/Irs2/Lep	12
BP	GO:1901617	organic hydroxy compound biosynthetic process	19/628	238/17943	0.0340163	Nr1d1/Gper1/Cyp27a1/Srebf1/Vdr/Ephx1/Tp53/Abcg1/Asah2/Ldha/Pnpo/Fgf2/Ntsr1/Nr4a2/Ch25h/Akr1c3/Lep/Crhr2/Alox15	19
BP	GO:0016202	regulation of striated muscle tissue development	15/628	166/17943	0.0340163	Cited2/Hey2/Nr1d2/Megf10/Jph2/Smad3/Col14a1/Cyp26b1/Dll1/Tbx1/Erbb3/Fgf2/Arntl/Cxadr/Myod1	15
BP	GO:0042632	cholesterol homeostasis	10/628	85/17943	0.0341605	Ephx2/Nr1d1/Lipg/Commd9/Cd24/Tmem97/Nfe2l1/Gpihbp1/Abcg1/Fabp3	10
BP	GO:0071326	cellular response to monosaccharide stimulus	17/628	203/17943	0.0364077	Nr1d1/Nptx1/Gper1/Met/Serpine1/Igf1r/Txn1/Kcnj11/Aacs/Slc2a5/Aqp4/Irs2/Ptprn/Glrx/Lep/Crhr2/Bad	17
BP	GO:0002709	regulation of T cell mediated immunity	10/628	86/17943	0.0364564	Cd1d1/RT1-N2/RT1-CE10/LOC100364500/RT1-A2/Cd24/RT1-N3/Hspa1a/RT1-A1/RT1-CE16	10
BP	GO:0055092	sterol homeostasis	10/628	86/17943	0.0364564	Ephx2/Nr1d1/Lipg/Commd9/Cd24/Tmem97/Nfe2l1/Gpihbp1/Abcg1/Fabp3	10
BP	GO:1901342	regulation of vasculature development	24/628	338/17943	0.0376896	Ccbe1/Gper1/Hey2/Htatip2/Ptgis/Serpine1/Runx1/Vegfb/Vash2/Ago2/Il6r/Pdpk1/Gpr4/Hmox1/Dll1/Agt/Fgf2/Hyal1/Cyp1b1/Lep/Adamts9/C6/Crhr2/Adgrb2	24
BP	GO:0043620	regulation of DNA-templated transcription in response to stress	8/628	58/17943	0.0379501	Cited2/Hsf4/Tp53/Atf3/Dnajb1/Hmox1/Hspa1a/Hspa1b	8
BP	GO:1901031	regulation of response to reactive oxygen species	7/628	45/17943	0.0379501	Met/Nol3/Tp53/Sesn1/Txn1/Glrx/Nr4a3	7
BP	GO:1901861	regulation of muscle tissue development	15/628	169/17943	0.0380711	Cited2/Hey2/Nr1d2/Megf10/Jph2/Smad3/Col14a1/Cyp26b1/Dll1/Tbx1/Erbb3/Fgf2/Arntl/Cxadr/Myod1	15
BP	GO:0048634	regulation of muscle organ development	15/628	170/17943	0.040094	Cited2/Hey2/Nr1d2/Megf10/Jph2/Smad3/Col14a1/Cyp26b1/Dll1/Tbx1/Erbb3/Fgf2/Arntl/Cxadr/Myod1	15
BP	GO:0001659	temperature homeostasis	16/628	188/17943	0.0402344	Nr1d1/Fabp5/Il15/Igf1r/Lpin1/Lnpep/Ednrb/Ybx2/Apln/Arntl/Ntsr1/Slc27a1/Lep/Npr3/G0s2/Lcn2	16
BP	GO:0016054	organic acid catabolic process	18/628	225/17943	0.0403899	Crabp1/Acad11/Bcat2/Crot/Ehhadh/Gstz1/Bckdha/Plin5/Lpin1/Etfbkmt/Cyp26b1/Bcat1/Pon3/Fabp3/Fgf2/Hyal1/Irs2/Lep	18
BP	GO:0046395	carboxylic acid catabolic process	18/628	225/17943	0.0403899	Crabp1/Acad11/Bcat2/Crot/Ehhadh/Gstz1/Bckdha/Plin5/Lpin1/Etfbkmt/Cyp26b1/Bcat1/Pon3/Fabp3/Fgf2/Hyal1/Irs2/Lep	18
BP	GO:0070613	regulation of protein processing	10/628	88/17943	0.0403899	Ccbe1/Chac1/Cd55/Cst7/Serpine1/Nol3/Birc3/Bag2/Susd4/C6	10
BP	GO:0045823	positive regulation of heart contraction	7/628	46/17943	0.0408069	Hey2/Ada/Pde4d/Hsp90aa1/Apln/Rnf207/Crhr2	7
BP	GO:0019320	hexose catabolic process	5/628	23/17943	0.0408069	Tp53/Ldha/Eno2/LOC100911625/Bad	5
BP	GO:0042178	xenobiotic catabolic process	5/628	23/17943	0.0408069	Gstm5/Gstp1/Cryz/Pon3/Gstm4	5
BP	GO:0046697	decidualization	6/628	34/17943	0.0410965	Cited2/Stc2/Junb/Ptgis/Serpine1/Vdr	6
BP	GO:0001503	ossification	27/628	404/17943	0.0411992	Dlk1/Cthrc1/Omd/Ostn/Fbn2/LOC103690116/Comp/Fhl2/Npnt/Junb/Tmem64/Tmem119/Fam20c/Scx/Smad3/Aspn/Smpd3/Rassf2/Mnda/Fgr/Fgf2/Osr2/Calcr/Spp1/Lep/Ranbp3l/Alox15	27
BP	GO:0001912	positive regulation of leukocyte mediated cytotoxicity	9/628	74/17943	0.0411992	Cd1d1/RT1-N2/RT1-CE10/LOC100364500/RT1-A2/RT1-N3/Hspa1a/RT1-A1/RT1-CE16	9
BP	GO:0031343	positive regulation of cell killing	10/628	89/17943	0.0411992	Cd1d1/RT1-N2/RT1-CE10/LOC100364500/RT1-A2/RT1-N3/Hspa1a/Bad/RT1-A1/RT1-CE16	10
BP	GO:0071560	cellular response to transforming growth factor beta stimulus	19/628	246/17943	0.0411992	Nepn/Cited2/Ankrd1/Fbn2/Npnt/Eid2/Serpine1/Runx1/Igf1r/Scx/Tp53/Smad3/Pdpk1/Aspn/Skil/Akr1c3/Adamtsl2/Hspa1a/Hspa1b	19
BP	GO:0048008	platelet-derived growth factor receptor signaling pathway	8/628	60/17943	0.0411992	Zfand5/Ndrg4/Arid5b/Smpd3/Slc9a3r1/Apod/Glrx/Nr4a3	8
BP	GO:0048871	multicellular organismal homeostasis	31/628	489/17943	0.0411992	Nr1d1/Dlk1/Met/Tmem64/Tmem119/Fabp5/Btbd9/Nr1d2/Il15/Igf1r/Scx/Lpin1/Lnpep/Col14a1/Cyp26b1/Ednrb/Ybx2/Dll1/Apln/Arntl/Ntsr1/Slc27a1/Aqp4/Cxadr/Spp1/Lep/Aqp7/Npr3/G0s2/Nr4a3/Lcn2	31
BP	GO:0010642	negative regulation of platelet-derived growth factor receptor signaling pathway	4/628	14/17943	0.0411992	Ndrg4/Slc9a3r1/Apod/Glrx	4
BP	GO:0070423	nucleotide-binding oligomerization domain containing signaling pathway	4/628	14/17943	0.0411992	Irgm/Ripk2/Hspa1a/Hspa1b	4
BP	GO:0070431	nucleotide-binding oligomerization domain containing 2 signaling pathway	4/628	14/17943	0.0411992	Irgm/Ripk2/Hspa1a/Hspa1b	4
BP	GO:0062012	regulation of small molecule metabolic process	25/628	366/17943	0.0427559	Ephx2/Nr1d1/Pfkfb3/Gper1/Srebf1/Fabp5/Vdr/Nfe2l1/Ppp1r3d/Tp53/Plin5/Ppp1r3c/Etfbkmt/Sik1/Abcg1/Smpd3/Agt/Fabp3/Ntsr1/Irs2/LOC687508/Akr1c3/Lep/Bad/Nr4a3	25
BP	GO:1903317	regulation of protein maturation	10/628	90/17943	0.0427559	Ccbe1/Chac1/Cd55/Cst7/Serpine1/Nol3/Birc3/Bag2/Susd4/C6	10
BP	GO:1903205	regulation of hydrogen peroxide-induced cell death	6/628	35/17943	0.0439029	Met/Nol3/Tp53/Txn1/Glrx/Nr4a3	6
BP	GO:0030258	lipid modification	18/628	230/17943	0.0450639	Ephx2/Acad11/Crot/Ehhadh/Cygb/Plin5/Etfbkmt/Abcg1/Pik3c2g/Agt/Fabp3/Pip5k1b/Irs2/B3galt1/Apod/Lep/Alox15/Nr4a3	18
BP	GO:1904035	regulation of epithelial cell apoptotic process	10/628	91/17943	0.0455507	Gper1/Serpine1/Igf1r/Tp53/Pdpk1/Hmox1/Angptl4/Akr1c3/Scg2/Bad	10
BP	GO:0009126	purine nucleoside monophosphate metabolic process	21/628	289/17943	0.0468359	Pfkfb3/Prps2/Prkag3/Bphl/Nudt10/Fam20c/Uqcrq/Tp53/Ada/Myh3/Ldha/Nt5c1a/Eno2/LOC100911625/LOC687508/Slc25a25/Hspa1a/Hspa1b/Slc4a1/Ak1/Bad	21
BP	GO:0002819	regulation of adaptive immune response	16/628	194/17943	0.0468359	Cd1d1/RT1-N2/RT1-CE10/LOC100364500/RT1-A2/Cd55/Cd24/Ripk2/RT1-N3/Il6r/Ada/Susd4/Hspa1a/Alox15/RT1-A1/RT1-CE16	16
BP	GO:1901653	cellular response to peptide	28/628	432/17943	0.0472225	Gper1/Met/Klf15/Srebf1/Serpine1/Vdr/Igf1r/Ripk2/Tp53/Gstp1/Klf3/Lpin1/Sh2b2/Pdpk1/Leprot/Smpd3/Agt/Dpep1/Erbb3/Nr4a2/Irs2/Mzb1/Cyp1b1/Akr1c3/Lep/Crhr2/Atp1a3/Nr4a3	28
BP	GO:0002931	response to ischemia	8/628	62/17943	0.0472225	Panx1/Nol3/Sqstm1/Tp53/Kcnj11/Glrx/Uchl1/Hspa1b	8
BP	GO:0008344	adult locomotory behavior	11/628	108/17943	0.0481037	Hoxd10/Btbd9/Scn1a/Hoxd9/Atxn1/Ntsr1/Nr4a2/Sez6l2/Uchl1/Atp1a3/Sez6l	11
BP	GO:0019432	triglyceride biosynthetic process	6/628	36/17943	0.0482212	Srebf1/Acsl4/Plin5/Lpin1/Sik1/Slc27a1	6
BP	GO:0046890	regulation of lipid biosynthetic process	15/628	177/17943	0.0482212	Nr1d1/Gper1/Srebf1/Fabp5/Vdr/Igf1r/Plin5/Sik1/Abcg1/Smpd3/Agt/Fabp3/Slc27a1/Akr1c3/Lep	15
BP	GO:0055088	lipid homeostasis	13/628	142/17943	0.0484911	Ephx2/Nr1d1/Lipg/Slc25a27/Commd9/Cd24/Tmem97/Nr1d2/Nfe2l1/Gpihbp1/Abcg1/Angptl4/Fabp3	13
BP	GO:1904659	glucose transmembrane transport	12/628	125/17943	0.0484911	Slc25a27/Ostn/Met/Klf15/Fabp5/Erbb3/Slc2a5/Irs2/Lep/Clip3/Ak1/Nr4a3	12
BP	GO:0035872	nucleotide-binding domain, leucine rich repeat containing receptor signaling pathway	4/628	15/17943	0.0487229	Irgm/Ripk2/Hspa1a/Hspa1b	4
BP	GO:0097201	negative regulation of transcription from RNA polymerase II promoter in response to stress	4/628	15/17943	0.0487229	Cited2/Dnajb1/Hspa1a/Hspa1b	4
BP	GO:0033273	response to vitamin	15/628	178/17943	0.0487229	Tnc/Stc2/Vdr/Il15/Igf1r/Tp53/Gstp1/Ada/Abcb1a/Dnmt3a/Cyp26b1/Gdap1/Spp1/Lep/Crym	15
BP	GO:0032355	response to estradiol	19/628	253/17943	0.0487229	Gper1/Vdr/Aldh2/Igf1r/Gstp1/Kcnj11/Abcb1a/Dnmt3a/Agt/Eno2/Bdh1/Hba-a2/Aqp4/Cyp1b1/Glrx/Lep/Myod1/Ak1/Bad	19
BP	GO:0071559	response to transforming growth factor beta	19/628	253/17943	0.0487229	Nepn/Cited2/Ankrd1/Fbn2/Npnt/Eid2/Serpine1/Runx1/Igf1r/Scx/Tp53/Smad3/Pdpk1/Aspn/Skil/Akr1c3/Adamtsl2/Hspa1a/Hspa1b	19
BP	GO:0060047	heart contraction	17/628	215/17943	0.0487229	Met/Cacna1g/Hey2/Srebf1/Gaa/Scn1a/Vegfb/Ada/Pde4d/Agt/Hsp90aa1/Apln/Cxadr/Pde4b/Rnf207/Crhr2/Atp1a3	17
BP	GO:0008645	hexose transmembrane transport	12/628	126/17943	0.0495736	Slc25a27/Ostn/Met/Klf15/Fabp5/Erbb3/Slc2a5/Irs2/Lep/Clip3/Ak1/Nr4a3	12
BP	GO:0007422	peripheral nervous system development	9/628	78/17943	0.0496154	Cited2/Hoxd10/Hoxd9/Prx/Ednrb/Cntnap1/Agt/Erbb3/Adgrb2	9
CC	GO:0043209	myelin sheath	11/639	65/18437	0.00682312	Kcnj11/Prx/Hsp90aa1/LOC103692716/Pllp/Mpz/Mbp/Pmp2/Plp1/Tubb4a/Atp1a3	11
CC	GO:0031012	extracellular matrix	29/639	362/18437	0.00704574	Nepn/Ccbe1/Mmrn1/Cthrc1/Omd/Fbn2/LOC103690116/Comp/Tnc/Col6a6/Lrrn2/Npnt/Col22a1/Serpine1/Mmp27/Runx1/Frem1/Chad/Fmod/Col14a1/Aspn/Nav2/Hsp90aa1/Lamb3/Lama3/Adamts9/Col24a1/Adamtsl2/Mmp11	29
MF	GO:0033218	amide binding	32/591	369/16869	0.00112309	Cd1d1/RT1-N2/RT1-CE10/Acbd4/LOC100364500/RT1-A2/Lbp/RT1-Ba/Gstm5/Igf1r/RT1-N3/Gstp1/Fzd4/Lnpep/Itm2a/Plod1/Acad9/Ednrb/Msr1/Fasn/Gria2/Npr1/Cd14/Apba1/Calcr/Clip3/Npr3/Gstm4/Crhr2/Atp1a3/RT1-A1/RT1-CE16	32
MF	GO:0042277	peptide binding	28/591	302/16869	0.00112309	Cd1d1/RT1-N2/RT1-CE10/LOC100364500/RT1-A2/Lbp/RT1-Ba/Gstm5/Igf1r/RT1-N3/Gstp1/Fzd4/Lnpep/Itm2a/Plod1/Ednrb/Msr1/Gria2/Npr1/Cd14/Apba1/Calcr/Npr3/Gstm4/Crhr2/Atp1a3/RT1-A1/RT1-CE16	28
MF	GO:0042605	peptide antigen binding	8/591	34/16869	0.00455036	RT1-N2/RT1-CE10/LOC100364500/RT1-A2/RT1-Ba/RT1-N3/RT1-A1/RT1-CE16	8
MF	GO:0031072	heat shock protein binding	16/591	142/16869	0.00746099	Cd24/Cyp27a1/Mettl21c/Gbp1/Ulk1/Bag2/Kcnj11/Etfbkmt/Dnajb1/Dnaja1/Fkbp5/Iqcg/Arntl/Rnf207/Hspa1a/Hspa1b	16
MF	GO:0016709	oxidoreductase activity, acting on paired donors, with incorporation or reduction of molecular oxygen, NAD(P)H as one donor, and incorporation of one atom of oxygen	8/591	44/16869	0.0195759	Fmo5/Cyp27a1/Fmo2/Fmo3/Cyp26b1/Akr1c19/Ch25h/Akr1c3	8
MF	GO:0003823	antigen binding	10/591	70/16869	0.0199883	Cd1d1/RT1-N2/RT1-CE10/LOC100364500/RT1-A2/RT1-Ba/RT1-N3/Fcna/RT1-A1/RT1-CE16	10
MF	GO:0004364	glutathione transferase activity	7/591	36/16869	0.0228726	Gstt3/Mgst2/Gstm5/Gstz1/Gstt2/Gstp1/Gstm4	7
MF	GO:0016801	hydrolase activity, acting on ether bonds	4/591	10/16869	0.0228726	Ephx2/Tmem86a/Ephx1/Alox15	4
MF	GO:0019911	structural constituent of myelin sheath	4/591	10/16869	0.0228726	Mal/Pllp/Mbp/Plp1	4
MF	GO:0016684	oxidoreductase activity, acting on peroxide as acceptor	8/591	54/16869	0.0422636	Mgst2/Cygb/Gstt2/Gstp1/Sesn1/Hba-a1/Hba-a2/Hbb	8
MF	GO:0050662	coenzyme binding	23/591	311/16869	0.0451326	Tp53i3/Acbd4/Fmo5/Acad11/Accs/Kyat3/Aldh2/Egln3/Kcnab1/Dus3l/Fmo2/Plod1/Fmo3/Acad9/Cryz/Ldha/Carns1/Fasn/Pnpo/Alas2/Aox3/Foxred2/Crym	23

## Sheet: exercise Wistar.GO
#GO enrichment analysis of differentially expressed genes in the exercise Wistar vs. Wistar comparison
ONTOLOGY	ID	Description	GeneRatio	BgRatio	p.adjust	geneID	Count
BP	GO:0060537	muscle tissue development	56/501	474/17943	1.92973e-16	Tnnc1/Tnni1/Tp63/Myh6/Myl2/Myom3/Myh7/Rbp4/Myoz2/Ankrd2/Pitx2/S100b/Fhl2/Fos/Myl3/Csrp3/Chrnd/Bmp7/Hdac9/Myog/Agt/Crhr2/Zfpm2/Adrb2/Igfbp5/Edn1/Myh10/Egr1/Cxadr/Egr2/Pi16/Myc/Actc1/Prox1/Tbx3/Ankrd1/Gpx1/Tbx1/Btg2/Neurl1/Eya1/Rxrg/Mapk14/Mybpc2/Myom2/Asb2/Myf6/Smad3/Vegfa/Col19a1/Adamts9/Pim1/Arntl/Fgf2/Ppargc1a/Chd7	56
BP	GO:0014706	striated muscle tissue development	53/501	451/17943	1.3293e-15	Tnnc1/Tnni1/Myh6/Myl2/Myom3/Myh7/Rbp4/Myoz2/Ankrd2/Pitx2/S100b/Fhl2/Fos/Myl3/Csrp3/Chrnd/Bmp7/Hdac9/Myog/Agt/Crhr2/Zfpm2/Adrb2/Edn1/Myh10/Egr1/Cxadr/Egr2/Pi16/Myc/Actc1/Prox1/Tbx3/Ankrd1/Gpx1/Tbx1/Btg2/Neurl1/Eya1/Rxrg/Mapk14/Mybpc2/Myom2/Asb2/Myf6/Smad3/Vegfa/Col19a1/Adamts9/Pim1/Arntl/Fgf2/Chd7	53
BP	GO:0007517	muscle organ development	47/501	417/17943	5.09693e-13	Tnnc1/Tnni1/Myh6/Myl2/Myom3/Myh7/Rbp4/Myoz2/Ankrd2/Pitx2/S100b/Fos/Myl3/Csrp3/Chrnd/Hdac9/Myog/Crhr2/Zfpm2/Adrb2/Edn1/Egr1/Cxadr/Egr2/Pi16/Myc/Cryab/Actc1/Prox1/Ankrd1/Kremen1/Gpx1/Tbx1/Btg2/Neurl1/Rxrg/Mapk14/Mybpc2/Myom2/Asb2/Myf6/Smad3/Col19a1/Pim1/Arntl/Fgf2/Chd7	47
BP	GO:0045444	fat cell differentiation	33/501	246/17943	8.66846e-11	Lep/Adipoq/Scd/Retn/Zfp385a/Plac8/Cebpa/Sfrp2/Zfpm2/Adrb2/Pparg/Zfp36/Cebpd/Egr2/Gdf10/Lpl/Arl6/Rarres2/Gpx1/Rorc/Mapk14/Smad3/Vegfa/Zc3h12a/Tmem120b/Lamb3/Arntl/Noct/Foxo1/Zbtb16/Ppargc1a/Lpin1/Nr4a3	33
BP	GO:0003012	muscle system process	40/501	418/17943	1.07679e-08	Lep/Tnnc1/Tnnt1/Tnni1/Myh6/Myl2/Myom3/Myh7/Scn1a/Atp2a2/Myoz2/Casq2/Comp/Myl3/Lmcd1/Csrp3/Chrnd/Ncf1/Fbxo32/Myog/Agt/Adrb2/Igfbp5/Edn1/Pi16/Actc1/Aif1/Sln/Myh3/Klf15/Pde4b/Mybpc2/Myom2/Smad3/Zc3h12a/Foxo1/Pde4d/Nos1/Ppargc1a/Nr4a3	40
BP	GO:0048738	cardiac muscle tissue development	30/501	255/17943	2.3927e-08	Tnnc1/Tnni1/Myh6/Myl2/Myom3/Myh7/Rbp4/Pitx2/Fhl2/Myl3/Csrp3/Bmp7/Agt/Zfpm2/Edn1/Myh10/Cxadr/Pi16/Actc1/Prox1/Tbx3/Ankrd1/Mapk14/Mybpc2/Myom2/Vegfa/Adamts9/Pim1/Fgf2/Chd7	30
BP	GO:1901653	cellular response to peptide	39/501	432/17943	8.10386e-08	Pck1/Lep/Cish/Adipoq/Myh7/Tshr/Trem2/Csrp3/Serpine1/Hdac9/Ccl2/Agt/Crhr2/Adrb2/Pparg/Edn1/Egr1/Pde3b/Myc/Cyp1b1/Lpl/Rarres2/Ripk2/Klf2/Klf15/Camk2a/Max/Sorbs1/Ptpn1/Cacna1a/LOC100362738/Klf10/Map1b/Pkm/Irs1/Mzb1/Foxo1/Lpin1/Nr4a3	39
BP	GO:0007519	skeletal muscle tissue development	26/501	207/17943	8.51061e-08	Myoz2/Ankrd2/Pitx2/S100b/Fos/Myl3/Chrnd/Hdac9/Myog/Crhr2/Adrb2/Egr1/Egr2/Myc/Ankrd1/Gpx1/Tbx1/Btg2/Neurl1/Rxrg/Mapk14/Myom2/Asb2/Myf6/Col19a1/Arntl	26
BP	GO:0060415	muscle tissue morphogenesis	17/501	85/17943	8.51061e-08	Tnnc1/Tnni1/Myh6/Myl2/Myom3/Myh7/Pitx2/Myl3/Zfpm2/Actc1/Prox1/Ankrd1/Tbx1/Mybpc2/Myom2/Myf6/Chd7	17
BP	GO:0003007	heart morphogenesis	30/501	274/17943	8.61368e-08	Tnnc1/Tnni1/Myh6/Myl2/Myom3/Myh7/Rbp4/Pitx2/Fhl2/Myl3/Bmp7/Sfrp2/Zfpm2/Robo2/Actc1/Prox1/Tmem100/Tbx3/Ankrd1/Jun/Tbx1/Zmiz1/Eya1/Mybpc2/Myom2/Smad3/Vegfa/Pim1/Mical2/Chd7	30
BP	GO:0055001	muscle cell development	26/501	211/17943	9.97538e-08	Tnnt1/Myh6/Myl2/Myom3/Atp2a2/Myoz2/Casq2/Pitx2/Fhl2/Comp/Csrp3/Hdac9/Myog/Agt/Edn1/Myh10/Cxadr/Pi16/Actc1/Prox1/Tbx3/Gpx1/Mybpc2/Myom2/Myf6/Vegfa	26
BP	GO:0043500	muscle adaptation	20/501	125/17943	1.03586e-07	Tnnc1/Tnnt1/Tnni1/Myh6/Myh7/Atp2a2/Myoz2/Lmcd1/Fbxo32/Myog/Agt/Igfbp5/Edn1/Pi16/Aif1/Klf15/Smad3/Foxo1/Ppargc1a/Nr4a3	20
BP	GO:0051384	response to glucocorticoid	31/501	297/17943	1.03586e-07	Pck1/Adipoq/Fosb/Cdo1/Aldh3a1/S100b/Fos/Fbxo32/Bche/Serpine1/Cdkn1a/Ccl2/Cebpa/Sfrp4/Crhr2/Dusp1/Adrb2/Zfp36/Edn1/Aif1/Ephx1/Cyp1b1/Maob/Ddit4/Aqp4/RT1-Ba/Gpx3/Ctsl/Vegfa/Foxo1/Ucp3	31
BP	GO:0055002	striated muscle cell development	25/501	198/17943	1.03586e-07	Tnnt1/Myh6/Myl2/Myom3/Myoz2/Casq2/Pitx2/Fhl2/Comp/Csrp3/Hdac9/Myog/Agt/Edn1/Myh10/Cxadr/Pi16/Actc1/Prox1/Tbx3/Gpx1/Mybpc2/Myom2/Myf6/Vegfa	25
BP	GO:0060538	skeletal muscle organ development	26/501	219/17943	1.6633e-07	Myoz2/Ankrd2/Pitx2/S100b/Fos/Myl3/Chrnd/Hdac9/Myog/Crhr2/Adrb2/Egr1/Egr2/Myc/Ankrd1/Gpx1/Tbx1/Btg2/Neurl1/Rxrg/Mapk14/Myom2/Asb2/Myf6/Col19a1/Arntl	26
BP	GO:0048644	muscle organ morphogenesis	17/501	92/17943	1.76429e-07	Tnnc1/Tnni1/Myh6/Myl2/Myom3/Myh7/Pitx2/Myl3/Zfpm2/Actc1/Prox1/Ankrd1/Tbx1/Mybpc2/Myom2/Myf6/Chd7	17
BP	GO:0051146	striated muscle cell differentiation	32/501	329/17943	2.58441e-07	Tnnt1/Myh6/Myl2/Myom3/Myoz2/Casq2/Ankrd2/Pitx2/Fhl2/Comp/Csrp3/Hdac9/Myog/Agt/Igfbp5/Edn1/Myh10/Barx2/Cxadr/Pi16/Actc1/Prox1/Tbx3/Cd53/Gpx1/Tbx1/Neu2/Mapk14/Mybpc2/Myom2/Myf6/Vegfa	32
BP	GO:0055008	cardiac muscle tissue morphogenesis	15/501	72/17943	2.80407e-07	Tnnc1/Tnni1/Myh6/Myl2/Myom3/Myh7/Pitx2/Myl3/Zfpm2/Actc1/Prox1/Ankrd1/Mybpc2/Myom2/Chd7	15
BP	GO:0045598	regulation of fat cell differentiation	20/501	137/17943	3.59036e-07	Lep/Adipoq/Zfp385a/Cebpa/Sfrp2/Zfpm2/Pparg/Zfp36/Lpl/Rarres2/Rorc/Mapk14/Smad3/Vegfa/Zc3h12a/Arntl/Noct/Foxo1/Zbtb16/Lpin1	20
BP	GO:0001525	angiogenesis	40/501	494/17943	4.09952e-07	Lep/Rspo3/Pitx2/Ramp1/C6/Cma1/Angpt4/Serpine1/Hdac9/Ccl2/Agt/Crhr2/Sfrp2/Adrb2/Pf4/Pparg/Apold1/Edn1/Pde3b/F3/Ccl24/Cyp1b1/Tmem100/Anpep/Sema4a/Ddah1/Jun/Ppp1r15a/Klf2/Gpx1/Tbx1/Hspb1/Ptk2b/Mapk14/Pkm/Ago2/Vegfa/Zc3h12a/Adamts9/Fgf2	40
BP	GO:1901342	regulation of vasculature development	32/501	338/17943	4.10242e-07	Lep/C6/Cma1/Angpt4/Bmp7/Serpine1/Hdac9/Ccl2/Agt/Crhr2/Sfrp2/Adrb2/Pf4/Pparg/Egr1/Pde3b/F3/Ccl24/Cyp1b1/Tmem100/Sema4a/Ddah1/Ppp1r15a/Klf2/Hspb1/Ptk2b/Pkm/Ago2/Vegfa/Zc3h12a/Adamts9/Fgf2	32
BP	GO:0031960	response to corticosteroid	31/501	321/17943	4.37236e-07	Pck1/Adipoq/Fosb/Cdo1/Aldh3a1/S100b/Fos/Fbxo32/Bche/Serpine1/Cdkn1a/Ccl2/Cebpa/Sfrp4/Crhr2/Dusp1/Adrb2/Zfp36/Edn1/Aif1/Ephx1/Cyp1b1/Maob/Ddit4/Aqp4/RT1-Ba/Gpx3/Ctsl/Vegfa/Foxo1/Ucp3	31
BP	GO:0014888	striated muscle adaptation	13/501	55/17943	5.51658e-07	Tnnc1/Tnnt1/Tnni1/Myh6/Myh7/Atp2a2/Myoz2/Myog/Igfbp5/Klf15/Smad3/Foxo1/Ppargc1a	13
BP	GO:0055013	cardiac muscle cell development	17/501	104/17943	8.41588e-07	Myh6/Myl2/Myom3/Pitx2/Fhl2/Csrp3/Agt/Edn1/Myh10/Cxadr/Pi16/Actc1/Prox1/Tbx3/Mybpc2/Myom2/Vegfa	17
BP	GO:0043502	regulation of muscle adaptation	17/501	108/17943	1.46151e-06	Tnnc1/Tnnt1/Tnni1/Myh7/Atp2a2/Lmcd1/Fbxo32/Myog/Agt/Igfbp5/Edn1/Pi16/Aif1/Smad3/Foxo1/Ppargc1a/Nr4a3	17
BP	GO:0055006	cardiac cell development	17/501	109/17943	1.62266e-06	Myh6/Myl2/Myom3/Pitx2/Fhl2/Csrp3/Agt/Edn1/Myh10/Cxadr/Pi16/Actc1/Prox1/Tbx3/Mybpc2/Myom2/Vegfa	17
BP	GO:0045765	regulation of angiogenesis	29/501	305/17943	1.6459e-06	Lep/C6/Cma1/Angpt4/Serpine1/Hdac9/Ccl2/Agt/Crhr2/Sfrp2/Adrb2/Pf4/Pparg/Pde3b/F3/Ccl24/Cyp1b1/Sema4a/Ddah1/Ppp1r15a/Klf2/Hspb1/Ptk2b/Pkm/Ago2/Vegfa/Zc3h12a/Adamts9/Fgf2	29
BP	GO:0071375	cellular response to peptide hormone stimulus	32/501	362/17943	1.6459e-06	Pck1/Lep/Cish/Adipoq/Myh7/Tshr/Csrp3/Serpine1/Hdac9/Ccl2/Agt/Crhr2/Pparg/Edn1/Egr1/Pde3b/Myc/Cyp1b1/Lpl/Rarres2/Camk2a/Max/Sorbs1/Ptpn1/LOC100362738/Map1b/Pkm/Irs1/Mzb1/Foxo1/Lpin1/Nr4a3	32
BP	GO:0009410	response to xenobiotic stimulus	34/501	404/17943	1.87992e-06	Pck1/Fosb/Cdo1/Casq2/Sncg/Prkar2b/Gsta4/Phgdh/Fbxo32/Serpine1/Hdac9/Ccl2/Cebpa/Adrb2/Pparg/Cyp1a1/Edn1/Egr1/Rgs10/Aif1/Cyp1b1/Ddit4/Ppp1r15a/Gstm5/Gpx1/Rorc/Gpi/Ptk2b/Vegfa/Irs1/Foxo1/Nos1/Ppargc1a/En1	34
BP	GO:0035994	response to muscle stretch	9/501	25/17943	2.08667e-06	Fos/Csrp3/Edn1/Nfkbia/Ankrd1/Jun/Hspb1/Gpi/Mapk14	9
BP	GO:0072593	reactive oxygen species metabolic process	28/501	294/17943	2.5716e-06	Lep/Ier3/Ncf1/Cdkn1a/Agt/Tyrobp/Tlr5/Cyp1a1/Acp5/Edn1/Cryab/Aif1/Cyp1b1/Tspo/Ddit4/Ddah1/Hba-a1/Hba-a2/Klf2/Gpx3/Hbb/Gpx1/Ptk2b/Mapk14/Smad3/Zc3h12a/Foxo1/Nos1	28
BP	GO:0050727	regulation of inflammatory response	31/501	358/17943	3.97692e-06	Lep/Adipoq/Trem2/Ier3/C6/Slpi/Cd6/Serpine1/Agt/Dnase1l3/Cebpa/Adrb2/Pparg/Acp5/Zfp36/Alox5ap/Ccl24/C1qa/Nfkbia/Lpl/Il33/Apod/Fcer1g/Gpx1/Susd4/Mapk14/Smad3/Sema7a/Zc3h12a/Wfdc1/Fanca	31
BP	GO:1990845	adaptive thermogenesis	20/501	163/17943	4.3491e-06	Lep/Adipoq/Scd/Tshr/Arrdc3/Decr1/Plac8/Cidea/Adrb2/Pparg/Nova1/Sln/Gadd45g/Prkab2/Vegfa/Arntl/Ucp3/Ppargc1a/Lpin1/G0s2	20
BP	GO:0030278	regulation of ossification	24/501	230/17943	4.39836e-06	Tp63/Comp/Smoc1/Bmp7/Fzd9/Cebpa/Sfrp2/Adrb2/Igfbp5/Cebpd/Egr2/Gdf10/Ccr1/Kremen1/Ptk2b/Mapk14/Smad3/Vegfa/Six2/Noct/Rassf2/Ostn/Fgf2/Zbtb16	24
BP	GO:0032868	response to insulin	29/501	326/17943	5.73125e-06	Pck1/Lep/Cish/Adipoq/Retn/Rbp4/Csrp3/Serpine1/Hdac9/Ccl2/Agt/Pparg/Egr1/Egr2/Pde3b/Myc/Lpl/Rarres2/Klf15/Max/Sorbs1/Ptpn1/LOC100362738/Pkm/Irs1/Mzb1/Foxo1/Ucp3/Lpin1	29
BP	GO:0042692	muscle cell differentiation	33/501	406/17943	5.77383e-06	Tnnt1/Myh6/Myl2/Myom3/Atp2a2/Myoz2/Casq2/Ankrd2/Pitx2/Fhl2/Comp/Csrp3/Hdac9/Myog/Agt/Igfbp5/Edn1/Myh10/Barx2/Cxadr/Pi16/Actc1/Prox1/Tbx3/Cd53/Gpx1/Tbx1/Neu2/Mapk14/Mybpc2/Myom2/Myf6/Vegfa	33
BP	GO:0016053	organic acid biosynthetic process	31/501	369/17943	6.8857e-06	Scd/Cdo1/Slc1a3/Lipg/Ier3/Tecrl/Phgdh/Myog/Hpgds/Agt/Fasn/Pparg/Cyp1a1/Edn1/Alox5ap/Alox5/Aldh1a3/Myc/Psat1/Prox1/Lpl/Ddit4/Bcat2/Carns1/Prkab2/Shmt1/LOC100362738/Gpi/Gpd1/Pkm/Ppargc1a	31
BP	GO:0090257	regulation of muscle system process	25/501	256/17943	7.57695e-06	Tnnc1/Tnnt1/Tnni1/Myh7/Atp2a2/Casq2/Myl3/Lmcd1/Ncf1/Fbxo32/Myog/Agt/Adrb2/Igfbp5/Edn1/Pi16/Aif1/Sln/Pde4b/Smad3/Zc3h12a/Foxo1/Pde4d/Ppargc1a/Nr4a3	25
BP	GO:0042133	neurotransmitter metabolic process	19/501	156/17943	9.00162e-06	Slc1a3/Phgdh/Bche/Agt/Colq/Tlr5/Acp5/Aif1/Cyp1b1/Tspo/Maob/Ddah1/Klf2/Shmt1/Ptk2b/Smad3/Zc3h12a/Nos1/Prima1	19
BP	GO:0014897	striated muscle hypertrophy	16/501	111/17943	9.00162e-06	Lep/Myh6/Myl2/Myh7/Atp2a2/Lmcd1/Csrp3/Fbxo32/Agt/Igfbp5/Edn1/Pi16/Klf15/Smad3/Foxo1/Nr4a3	16
BP	GO:0031098	stress-activated protein kinase signaling cascade	27/501	297/17943	9.00162e-06	Lep/Eda2r/Tpd52l1/Ncf1/Agt/Sfrp4/Crhr2/Sfrp2/Dusp1/Fzd4/Zfp36/Edn1/Myc/Cryab/Map3k14/Sh3rf2/Ripk2/Gadd45g/Ptpn1/Ptk2b/Mapk14/Slk/Vegfa/Zc3h12a/Fgd4/Foxo1/Rassf2	27
BP	GO:0050873	brown fat cell differentiation	11/501	49/17943	9.00162e-06	Lep/Adipoq/Scd/Plac8/Cebpa/Adrb2/Pparg/Rarres2/Mapk14/Lamb3/Ppargc1a	11
BP	GO:0043501	skeletal muscle adaptation	9/501	30/17943	9.00162e-06	Tnnc1/Tnnt1/Tnni1/Myh7/Atp2a2/Myoz2/Myog/Igfbp5/Ppargc1a	9
BP	GO:0014074	response to purine-containing compound	23/501	226/17943	1.03663e-05	Pck1/Adipoq/Fosb/Cdo1/Casq2/Aldh3a1/Fos/Serpine1/Ccl2/Dusp1/Pparg/Igfbp5/Egr1/Cyp1b1/Jun/Ppp1r15a/Cib2/Ptk2b/Gpd1/Irs1/Crem/Pde4d/Ppargc1a	23
BP	GO:0014896	muscle hypertrophy	16/501	113/17943	1.03663e-05	Lep/Myh6/Myl2/Myh7/Atp2a2/Lmcd1/Csrp3/Fbxo32/Agt/Igfbp5/Edn1/Pi16/Klf15/Smad3/Foxo1/Nr4a3	16
BP	GO:0030239	myofibril assembly	13/501	73/17943	1.03663e-05	Tnnt1/Myh6/Myl2/Myom3/Myoz2/Casq2/Csrp3/Edn1/Myh10/Actc1/Prox1/Mybpc2/Myom2	13
BP	GO:0033002	muscle cell proliferation	24/501	245/17943	1.06347e-05	Adipoq/Retn/Rbp4/Cdkn1a/Myog/Agt/Zfpm2/Pparg/Igfbp5/Edn1/Egr1/Cxadr/Myc/Aif1/Apod/Jun/Hbegf/Mapk14/Vegfa/Pim1/Fgf2/Pde4d/Ppargc1a/Nr4a3	24
BP	GO:0051403	stress-activated MAPK cascade	25/501	265/17943	1.17602e-05	Lep/Eda2r/Tpd52l1/Ncf1/Agt/Sfrp4/Crhr2/Sfrp2/Dusp1/Fzd4/Zfp36/Edn1/Myc/Cryab/Sh3rf2/Ripk2/Gadd45g/Ptpn1/Ptk2b/Mapk14/Vegfa/Zc3h12a/Fgd4/Foxo1/Rassf2	25
BP	GO:0001503	ossification	32/501	404/17943	1.23507e-05	Lep/Tp63/Fhl2/Comp/Smoc1/Bmp7/Fzd9/Myog/Cebpa/Sfrp2/Adrb2/Igfbp5/Acp5/Cebpd/Egr2/Gdf10/Ccr1/Asgr2/Clec3b/Kremen1/Phospho1/Klf10/Ptk2b/Mapk14/Smad3/Vegfa/Six2/Noct/Rassf2/Ostn/Fgf2/Zbtb16	32
BP	GO:0046394	carboxylic acid biosynthetic process	30/501	367/17943	1.52608e-05	Scd/Slc1a3/Lipg/Ier3/Tecrl/Phgdh/Myog/Hpgds/Agt/Fasn/Pparg/Cyp1a1/Edn1/Alox5ap/Alox5/Aldh1a3/Myc/Psat1/Prox1/Lpl/Ddit4/Bcat2/Carns1/Prkab2/Shmt1/LOC100362738/Gpi/Gpd1/Pkm/Ppargc1a	30
BP	GO:0060047	heart contraction	22/501	215/17943	1.55733e-05	Tnnc1/Tnnt1/Myh6/Myl2/Myh7/Scn1a/Atp2a2/Casq2/Myl3/Csrp3/Agt/Crhr2/Adrb2/Edn1/Cxadr/Actc1/Gpx1/Hbegf/Pde4b/Zc3h12a/Pde4d/Nos1	22
BP	GO:0106106	cold-induced thermogenesis	18/501	149/17943	1.68694e-05	Lep/Adipoq/Scd/Tshr/Arrdc3/Decr1/Plac8/Cidea/Adrb2/Nova1/Sln/Gadd45g/Prkab2/Vegfa/Arntl/Ppargc1a/Lpin1/G0s2	18
BP	GO:0120161	regulation of cold-induced thermogenesis	18/501	149/17943	1.68694e-05	Lep/Adipoq/Scd/Tshr/Arrdc3/Decr1/Plac8/Cidea/Adrb2/Nova1/Sln/Gadd45g/Prkab2/Vegfa/Arntl/Ppargc1a/Lpin1/G0s2	18
BP	GO:0007584	response to nutrient	30/501	371/17943	1.78742e-05	Lep/Adipoq/Aldh3a1/Pitx2/Lipg/Gstt1/Bche/Bmp7/Tnfrsf11b/Serpine1/Ccl2/Cebpa/Sfrp2/Pparg/C2/Cyp1a1/Acp5/Alox5/Folr2/Cyp1b1/Lpl/Tspo/Gpx1/Cib2/Map1b/Pkm/Vegfa/Pim1/Ucp3/Nos1	30
BP	GO:0055003	cardiac myofibril assembly	8/501	25/17943	2.14816e-05	Myl2/Myom3/Csrp3/Myh10/Actc1/Prox1/Mybpc2/Myom2	8
BP	GO:0003300	cardiac muscle hypertrophy	15/501	107/17943	2.39915e-05	Lep/Myh6/Myl2/Myh7/Atp2a2/Lmcd1/Csrp3/Fbxo32/Agt/Edn1/Pi16/Klf15/Smad3/Foxo1/Nr4a3	15
BP	GO:0035914	skeletal muscle cell differentiation	13/501	80/17943	2.55739e-05	Ankrd2/S100b/Fos/Myog/Egr1/Egr2/Myc/Ankrd1/Tbx1/Btg2/Asb2/Myf6/Arntl	13
BP	GO:0006631	fatty acid metabolic process	30/501	379/17943	2.61822e-05	Pck1/Lep/Adipoq/Scd/Ces1d/Lipg/Prkar2b/Tecrl/Decr1/Hpgds/Agt/Fasn/Pparg/Edn1/Dgat2/Alox5ap/Acsf2/Naaa/Cyp1b1/Lpl/Pla2g15/Prkab2/Mapk14/Irs1/Cyp4f18/Crem/Ucp3/Ppargc1a/Lpin1/Nr4a3	30
BP	GO:0001659	temperature homeostasis	20/501	188/17943	2.61822e-05	Lep/Adipoq/Scd/Tshr/Arrdc3/Decr1/Plac8/Cidea/Adrb2/Egr1/Nova1/Sln/Gpx1/Gadd45g/Prkab2/Vegfa/Arntl/Ppargc1a/Lpin1/G0s2	20
BP	GO:0003015	heart process	22/501	224/17943	2.70797e-05	Tnnc1/Tnnt1/Myh6/Myl2/Myh7/Scn1a/Atp2a2/Casq2/Myl3/Csrp3/Agt/Crhr2/Adrb2/Edn1/Cxadr/Actc1/Gpx1/Hbegf/Pde4b/Zc3h12a/Pde4d/Nos1	22
BP	GO:0048871	multicellular organismal homeostasis	35/501	489/17943	2.9543e-05	Lep/Adipoq/Scd/Tp63/Rbp4/Aqp7/Tshr/Arrdc3/Ampd3/Decr1/Tnfrsf11b/Plac8/Cidea/Adrb2/Acp5/Egr1/Cxadr/Mdm1/Nova1/Ldb2/Aqp4/Sln/Gpx1/Gadd45g/Cib2/Prkab2/Ptk2b/Vegfa/Arntl/Crocc/Ppargc1a/Lpin1/Ush1c/G0s2/Nr4a3	35
BP	GO:0032869	cellular response to insulin stimulus	23/501	244/17943	2.9643e-05	Pck1/Lep/Cish/Adipoq/Csrp3/Serpine1/Hdac9/Ccl2/Agt/Pparg/Egr1/Pde3b/Myc/Lpl/Rarres2/Sorbs1/Ptpn1/LOC100362738/Pkm/Irs1/Mzb1/Foxo1/Lpin1	23
BP	GO:0003206	cardiac chamber morphogenesis	17/501	143/17943	3.80008e-05	Tnnc1/Tnni1/Myh6/Myl2/Myh7/Rbp4/Pitx2/Fhl2/Myl3/Bmp7/Sfrp2/Zfpm2/Robo2/Prox1/Tbx3/Tbx1/Chd7	17
BP	GO:0006936	muscle contraction	26/501	306/17943	3.80008e-05	Tnnc1/Tnnt1/Tnni1/Myh6/Myl2/Myom3/Myh7/Scn1a/Atp2a2/Casq2/Comp/Myl3/Csrp3/Chrnd/Ncf1/Agt/Adrb2/Edn1/Actc1/Myh3/Pde4b/Mybpc2/Myom2/Zc3h12a/Pde4d/Nos1	26
BP	GO:0009612	response to mechanical stimulus	27/501	326/17943	3.80008e-05	Retn/Fosb/Scn1a/Fos/Slc1a3/Csrp3/Serpine1/Ccl2/Agt/Pparg/Tlr5/Edn1/Egr1/F3/Myc/Map3k14/Nfkbia/Ankrd1/Jun/Btg2/Hspb1/Gpi/Ptk2b/Map1b/Mapk14/Kcnc1/Nos1	27
BP	GO:0019318	hexose metabolic process	22/501	233/17943	4.84264e-05	Pck1/Lep/Adipoq/Rbp4/Igfbp5/Dgat2/Myc/Apod/Rorc/Sorbs1/Gpi/Gpd1/Mapk14/Pkm/LOC100911725/Pfkfb4/Irs1/Fbp2/Foxo1/Ppp1r3c/Crem/Ppargc1a	22
BP	GO:0003229	ventricular cardiac muscle tissue development	11/501	60/17943	5.08517e-05	Tnnc1/Tnni1/Myh6/Myl2/Myh7/Myl3/Zfpm2/Prox1/Tbx3/Adamts9/Chd7	11
BP	GO:0015893	drug transport	22/501	236/17943	5.83193e-05	Slc7a10/Retn/Rbp4/Slc36a2/Sncg/Slc1a3/Agt/Slc1a5/Fzd4/Edn1/Kcna2/Folr2/Sfxn1/LOC103694857/Aqp4/Hba-a1/LOC103694855/Hba-a2/Hbb/Cacna1a/Slc38a3/Slc25a25	22
BP	GO:0055007	cardiac muscle cell differentiation	17/501	148/17943	5.83193e-05	Myh6/Myl2/Myom3/Pitx2/Fhl2/Csrp3/Agt/Edn1/Myh10/Cxadr/Pi16/Actc1/Prox1/Tbx3/Mybpc2/Myom2/Vegfa	17
BP	GO:0120162	positive regulation of cold-induced thermogenesis	14/501	102/17943	6.21669e-05	Lep/Adipoq/Scd/Tshr/Decr1/Plac8/Adrb2/Sln/Gadd45g/Prkab2/Vegfa/Ppargc1a/Lpin1/G0s2	14
BP	GO:0045600	positive regulation of fat cell differentiation	11/501	63/17943	7.91857e-05	Zfp385a/Cebpa/Sfrp2/Pparg/Zfp36/Lpl/Rarres2/Mapk14/Zc3h12a/Noct/Zbtb16	11
BP	GO:0006006	glucose metabolic process	20/501	204/17943	7.91857e-05	Pck1/Lep/Adipoq/Rbp4/Igfbp5/Dgat2/Myc/Apod/Rorc/Sorbs1/Gpi/Gpd1/Mapk14/Pkm/Irs1/Fbp2/Foxo1/Ppp1r3c/Crem/Ppargc1a	20
BP	GO:0006941	striated muscle contraction	18/501	169/17943	7.94861e-05	Tnnc1/Tnnt1/Myh6/Myl2/Myh7/Scn1a/Atp2a2/Casq2/Myl3/Csrp3/Chrnd/Adrb2/Actc1/Myh3/Pde4b/Zc3h12a/Pde4d/Nos1	18
BP	GO:1901861	regulation of muscle tissue development	18/501	169/17943	7.94861e-05	Rbp4/S100b/Hdac9/Myog/Zfpm2/Adrb2/Igfbp5/Edn1/Cxadr/Pi16/Tbx1/Mapk14/Myf6/Smad3/Pim1/Arntl/Fgf2/Ppargc1a	18
BP	GO:0008015	blood circulation	34/501	493/17943	8.20978e-05	Lep/Tnnc1/Adipoq/Tnnt1/Myh6/Myl2/Myh7/Scn1a/Atp2a2/Casq2/Comp/Myl3/Ier3/Csrp3/Agt/Crhr2/Adrb2/Pparg/Edn1/Cxadr/Alox5/Actc1/Cpa3/Ddah1/Gpx1/Hbegf/Pde4b/Smad3/Vegfa/Zc3h12a/Slc2a5/Pde4d/Nos1/Chd7	34
BP	GO:0072330	monocarboxylic acid biosynthetic process	23/501	263/17943	8.98984e-05	Scd/Slc1a3/Lipg/Ier3/Tecrl/Myog/Hpgds/Agt/Fasn/Pparg/Cyp1a1/Edn1/Aldh1a3/Myc/Prox1/Lpl/Ddit4/Prkab2/LOC100362738/Gpi/Gpd1/Pkm/Ppargc1a	23
BP	GO:0002026	regulation of the force of heart contraction	8/501	31/17943	9.65562e-05	Myh6/Myl2/Myh7/Atp2a2/Myl3/Csrp3/Adrb2/Nos1	8
BP	GO:0048660	regulation of smooth muscle cell proliferation	18/501	173/17943	0.000105427	Adipoq/Retn/Cdkn1a/Agt/Pparg/Igfbp5/Edn1/Egr1/Myc/Aif1/Apod/Jun/Hbegf/Vegfa/Fgf2/Pde4d/Ppargc1a/Nr4a3	18
BP	GO:0030099	myeloid cell differentiation	30/501	411/17943	0.000105427	Lep/Adipoq/Trem2/Fos/Zfp385a/Cebpa/Tyrobp/Fasn/Pf4/Pparg/Lrrc17/Acp5/Zfp36/Myc/Sfxn1/Nfkbia/Ccr1/Alas2/Jun/Pir/Hba-a2/Fcer1g/Klf2/Hbb/Klf10/Ptk2b/Mapk14/Vegfa/Rassf2/Zbtb16	30
BP	GO:0014910	regulation of smooth muscle cell migration	13/501	93/17943	0.000107858	Adipoq/Retn/Serpine1/Agt/Igfbp5/Egr1/F3/Myc/Aif1/Cyp1b1/Pde4d/Ppargc1a/Nr4a3	13
BP	GO:0014733	regulation of skeletal muscle adaptation	6/501	15/17943	0.000108963	Tnnc1/Tnnt1/Tnni1/Myh7/Atp2a2/Igfbp5	6
BP	GO:0042136	neurotransmitter biosynthetic process	14/501	109/17943	0.000119722	Slc1a3/Agt/Tlr5/Acp5/Aif1/Cyp1b1/Tspo/Ddah1/Klf2/Shmt1/Ptk2b/Smad3/Zc3h12a/Nos1	14
BP	GO:0048747	muscle fiber development	12/501	81/17943	0.000138526	Myh6/Myl2/Myom3/Comp/Hdac9/Myog/Cxadr/Gpx1/Mybpc2/Myom2/Myf6/Vegfa	12
BP	GO:0045214	sarcomere organization	10/501	55/17943	0.000140987	Tnnt1/Myh6/Myom3/Myoz2/Casq2/Csrp3/Edn1/Prox1/Mybpc2/Myom2	10
BP	GO:0031099	regeneration	25/501	313/17943	0.000146204	Serpine1/Cdkn1a/Fzd9/Ccl2/Myog/Cebpa/Adrb2/Pparg/Gap43/Myc/Prps2/Nfkbia/Alas2/Tspo/Lcp1/Apod/Jun/Kremen1/Gpx1/Map1b/Mapk14/Pkm/Myf6/Lpin1/Nr4a3	25
BP	GO:0043062	extracellular structure organization	25/501	313/17943	0.000146204	Ces1d/Comp/Mmp27/Lipg/Cma1/Smoc1/Bmp7/Tnfrsf11b/Agt/Sfrp2/Dpp4/Colq/Ccdc80/Adamts20/Mmp23/Cyp1b1/Lpl/Lcp1/Abcg1/Pltp/Col22a1/Smad3/Col19a1/Adamts9/Lamb3	25
BP	GO:0006809	nitric oxide biosynthetic process	12/501	82/17943	0.000150949	Agt/Tlr5/Acp5/Aif1/Cyp1b1/Tspo/Ddah1/Klf2/Ptk2b/Smad3/Zc3h12a/Nos1	12
BP	GO:0048659	smooth muscle cell proliferation	18/501	179/17943	0.000153136	Adipoq/Retn/Cdkn1a/Agt/Pparg/Igfbp5/Edn1/Egr1/Myc/Aif1/Apod/Jun/Hbegf/Vegfa/Fgf2/Pde4d/Ppargc1a/Nr4a3	18
BP	GO:0048661	positive regulation of smooth muscle cell proliferation	14/501	112/17943	0.000153136	Retn/Agt/Igfbp5/Edn1/Egr1/Myc/Aif1/Jun/Hbegf/Vegfa/Fgf2/Pde4d/Ppargc1a/Nr4a3	14
BP	GO:0042474	middle ear morphogenesis	7/501	24/17943	0.000153454	Prrx2/Edn1/Myc/Tbx1/Eya4/Eya1/Six2	7
BP	GO:2000379	positive regulation of reactive oxygen species metabolic process	14/501	113/17943	0.000166651	Lep/Cdkn1a/Agt/Tyrobp/Tlr5/Aif1/Cyp1b1/Tspo/Ddah1/Klf2/Ptk2b/Mapk14/Smad3/Zc3h12a	14
BP	GO:0071496	cellular response to external stimulus	30/501	425/17943	0.000178445	Pck1/Lep/Fos/Serpine1/Cdkn1a/Ccl2/Agt/Sfrp2/Pparg/Tlr5/Egr1/Folr2/Map3k14/Aif1/Lpl/Ankrd1/Jun/Cd68/Ppp1r15a/Ptprc/Kcnb1/Ctsl/Cib2/Max/Klf10/Zc3h12a/Slc38a3/Pim1/Foxo1/Nos1	30
BP	GO:0032872	regulation of stress-activated MAPK cascade	21/501	238/17943	0.000182265	Lep/Eda2r/Tpd52l1/Ncf1/Sfrp4/Crhr2/Sfrp2/Dusp1/Fzd4/Edn1/Myc/Sh3rf2/Ripk2/Gadd45g/Ptpn1/Ptk2b/Vegfa/Zc3h12a/Fgd4/Foxo1/Rassf2	21
BP	GO:0035051	cardiocyte differentiation	18/501	182/17943	0.000182265	Myh6/Myl2/Myom3/Pitx2/Fhl2/Csrp3/Bmp7/Agt/Edn1/Myh10/Cxadr/Pi16/Actc1/Prox1/Tbx3/Mybpc2/Myom2/Vegfa	18
BP	GO:0014883	transition between fast and slow fiber	5/501	10/17943	0.000186709	Tnnc1/Tnnt1/Tnni1/Myh7/Atp2a2	5
BP	GO:0070302	regulation of stress-activated protein kinase signaling cascade	21/501	240/17943	0.000199899	Lep/Eda2r/Tpd52l1/Ncf1/Sfrp4/Crhr2/Sfrp2/Dusp1/Fzd4/Edn1/Myc/Sh3rf2/Ripk2/Gadd45g/Ptpn1/Ptk2b/Vegfa/Zc3h12a/Fgd4/Foxo1/Rassf2	21
BP	GO:0031032	actomyosin structure organization	19/501	202/17943	0.000199899	Tnnt1/Myh6/Myl2/Myom3/Myoz2/Casq2/Csrp3/Edn1/Myh10/Actc1/Prox1/Sorbs3/Sorbs1/Ptk2b/Mybpc2/Myom2/Smad3/Anln/Arhgap28	19
BP	GO:0006749	glutathione metabolic process	10/501	58/17943	0.000199899	Mgst1/Gsta4/Gstt1/Hpgds/Gstt3/Gstt2/Gstm5/Gpx3/Hbb/Gpx1	10
BP	GO:0014909	smooth muscle cell migration	13/501	100/17943	0.000199899	Adipoq/Retn/Serpine1/Agt/Igfbp5/Egr1/F3/Myc/Aif1/Cyp1b1/Pde4d/Ppargc1a/Nr4a3	13
BP	GO:0048739	cardiac muscle fiber development	6/501	17/17943	0.000204957	Myh6/Myom3/Cxadr/Mybpc2/Myom2/Vegfa	6
BP	GO:0097529	myeloid leukocyte migration	19/501	203/17943	0.000204957	Trem2/Serpine1/Ccl2/Dusp1/Pf4/Edn1/Ccl6/Dapk2/Cxadr/Ccl24/Aif1/Ccr1/Rarres2/Fcer1g/Pde4b/Ptk2b/Mapk14/Vegfa/Pde4d	19
BP	GO:1904018	positive regulation of vasculature development	19/501	203/17943	0.000204957	C6/Cma1/Angpt4/Serpine1/Hdac9/Sfrp2/Egr1/F3/Ccl24/Cyp1b1/Tmem100/Ddah1/Hspb1/Ptk2b/Pkm/Ago2/Vegfa/Zc3h12a/Fgf2	19
BP	GO:0051591	response to cAMP	16/501	150/17943	0.000217639	Pck1/Adipoq/Fosb/Cdo1/Aldh3a1/Fos/Serpine1/Dusp1/Igfbp5/Egr1/Cyp1b1/Jun/Ptk2b/Gpd1/Crem/Pde4d	16
BP	GO:0046209	nitric oxide metabolic process	12/501	87/17943	0.000238251	Agt/Tlr5/Acp5/Aif1/Cyp1b1/Tspo/Ddah1/Klf2/Ptk2b/Smad3/Zc3h12a/Nos1	12
BP	GO:0005996	monosaccharide metabolic process	22/501	265/17943	0.000256458	Pck1/Lep/Adipoq/Rbp4/Igfbp5/Dgat2/Myc/Apod/Rorc/Sorbs1/Gpi/Gpd1/Mapk14/Pkm/LOC100911725/Pfkfb4/Irs1/Fbp2/Foxo1/Ppp1r3c/Crem/Ppargc1a	22
BP	GO:0016042	lipid catabolic process	24/501	306/17943	0.000256458	Pck1/Lep/Adipoq/Plin1/Ces1d/Lipg/Pla2g4e/Decr1/Cidea/Pla2g2a/Naaa/Pde3b/Gm2a/Cyp1b1/Lpl/Rarres2/Pla2g15/Pla2g2d/Neu2/Ddhd2/Pla2g2c/Irs1/Cyp4f18/Lpin1	24
BP	GO:0030595	leukocyte chemotaxis	19/501	208/17943	0.000278712	Serpine1/Ccl2/Dusp1/Pf4/Edn1/Ccl6/Cxcr5/Dapk2/Cxadr/Ccl24/Aif1/Ccr1/Rarres2/Fcer1g/Pde4b/Ptk2b/Mapk14/Vegfa/Pde4d	19
BP	GO:0010927	cellular component assembly involved in morphogenesis	14/501	120/17943	0.000286823	Tnnt1/Myh6/Myl2/Myom3/Myoz2/Casq2/Csrp3/Edn1/Myh10/Actc1/Prox1/Mybpc2/Myom2/Nfasc	14
BP	GO:0071402	cellular response to lipoprotein particle stimulus	8/501	37/17943	0.000288085	Serpine1/Ccl2/Pparg/F3/Lpl/Cd68/Fcer1g/Abcg1	8
BP	GO:0001819	positive regulation of cytokine production	31/501	462/17943	0.000288284	Lep/Adipoq/Cd6/Serpine1/Ccl2/Agt/Agpat2/Vtcn1/Tyrobp/Crhr2/Pf4/Tlr5/Egr1/Nfam1/Fcna/Aif1/Cyp1b1/Lpl/Il33/Irf7/Ptprc/Fcer1g/Ripk2/Hspb1/Pde4b/Mapk14/Smad3/Sema7a/LOC103694381/Pde4d/Nr4a3	31
BP	GO:0071229	cellular response to acid chemical	25/501	330/17943	0.000288379	Pck1/Lep/Myh6/Myh7/Sncg/Ccl2/Myog/Pparg/Edn1/Dgat2/Egr1/Myc/Folr2/Lpl/Ret/Klf2/Tbx1/Hspb1/Neurl1/Shmt1/Ptk2b/Vegfa/Zc3h12a/Irs1/Ppargc1a	25
BP	GO:0031668	cellular response to extracellular stimulus	24/501	310/17943	0.000302614	Pck1/Lep/Fos/Serpine1/Cdkn1a/Ccl2/Sfrp2/Pparg/Folr2/Aif1/Lpl/Jun/Cd68/Ppp1r15a/Ptprc/Kcnb1/Ctsl/Cib2/Max/Klf10/Zc3h12a/Slc38a3/Pim1/Foxo1	24
BP	GO:0044262	cellular carbohydrate metabolic process	23/501	291/17943	0.00033139	Pck1/Lep/Adipoq/Ier3/Pygl/Myog/Igfbp5/Dgat2/Gbe1/Ddit4/Rorc/Neu2/Stbd1/Sorbs1/Ptk2b/Phka1/LOC100911725/Pfkfb4/Irs1/Fbp2/Foxo1/Ppp1r3c/Ppargc1a	23
BP	GO:0046683	response to organophosphorus	18/501	193/17943	0.000342902	Pck1/Adipoq/Fosb/Cdo1/Aldh3a1/Fos/Serpine1/Ccl2/Dusp1/Igfbp5/Egr1/Cyp1b1/Jun/Cib2/Ptk2b/Gpd1/Crem/Pde4d	18
BP	GO:2001057	reactive nitrogen species metabolic process	12/501	91/17943	0.000346446	Agt/Tlr5/Acp5/Aif1/Cyp1b1/Tspo/Ddah1/Klf2/Ptk2b/Smad3/Zc3h12a/Nos1	12
BP	GO:0055010	ventricular cardiac muscle tissue morphogenesis	9/501	50/17943	0.000355628	Tnnc1/Tnni1/Myh6/Myl2/Myh7/Myl3/Zfpm2/Prox1/Chd7	9
BP	GO:0001666	response to hypoxia	29/501	424/17943	0.000374365	Pck1/Lep/Adipoq/Aldh3a1/S100b/Angpt4/Serpine1/Ccl2/Kcnk3/Dpp4/Adrb2/Cyp1a1/Apold1/Edn1/Egr1/Myc/Cryab/Alas2/Ddit4/Ankrd1/Ddah1/Pdlim1/Ptk2b/Pkm/Smad3/Vegfa/Ucp3/Nos1/Ppargc1a	29
BP	GO:0003205	cardiac chamber development	18/501	195/17943	0.000382157	Tnnc1/Tnni1/Myh6/Myl2/Myh7/Rbp4/Pitx2/Fhl2/Myl3/Bmp7/Sfrp2/Zfpm2/Myh10/Robo2/Prox1/Tbx3/Tbx1/Chd7	18
BP	GO:0071356	cellular response to tumor necrosis factor	20/501	234/17943	0.000390498	Pck1/Adipoq/Ccl2/Myog/Cebpa/Zfp36/Edn1/Ccl6/Ccl24/Nfkbia/Cyp1b1/Ankrd1/Klf2/Ptk2b/Gpd1/Mapk14/Slk/Zc3h12a/Gbp1/Ppargc1a	20
BP	GO:0090130	tissue migration	23/501	296/17943	0.000412143	Angpt4/Serpine1/Hdac9/Agt/Dpp4/Pparg/Actc1/Prox1/Cyp1b1/Sema4a/Jun/Gpx1/Hbegf/Hspb1/Mcc/Gpi/Ptk2b/Vegfa/Zc3h12a/Rreb1/Adamts9/Anln/Fgf2	23
BP	GO:0033273	response to vitamin	17/501	178/17943	0.00041936	Lep/Pitx2/Gstt1/Bche/Bmp7/Ccl2/Cebpa/Pparg/Cyp1a1/Acp5/Folr2/Tspo/Gpx1/Map1b/Vegfa/Pim1/Nos1	17
BP	GO:0046660	female sex differentiation	17/501	179/17943	0.00044508	Lep/Retn/Tp63/Rbp4/Pitx2/Serpine1/Agt/Zfpm2/Dach1/Fzd4/Robo2/Myc/Tbx3/Vegfa/Inha/Fanca/Chd7	17
BP	GO:0060048	cardiac muscle contraction	14/501	126/17943	0.00044508	Tnnc1/Tnnt1/Myh6/Myl2/Myh7/Scn1a/Atp2a2/Casq2/Myl3/Csrp3/Actc1/Pde4b/Zc3h12a/Pde4d	14
BP	GO:0036293	response to decreased oxygen levels	30/501	453/17943	0.000461942	Pck1/Lep/Adipoq/Aldh3a1/S100b/Angpt4/Serpine1/Ccl2/Kcnk3/Dpp4/Adrb2/Cyp1a1/Apold1/Edn1/Egr1/Myc/Cryab/Alas2/Ddit4/Ankrd1/Ddah1/Ppp1r15a/Pdlim1/Ptk2b/Pkm/Smad3/Vegfa/Ucp3/Nos1/Ppargc1a	30
BP	GO:0032103	positive regulation of response to external stimulus	24/501	320/17943	0.000461942	Trem2/Cd6/Serpine1/Ccl2/Cebpa/Edn1/Dapk2/Alox5ap/Ccl24/C1qa/Nfkbia/Aif1/Ccr1/Lpl/Il33/Rarres2/Fcer1g/Ripk2/Hspb1/Ptk2b/Mapk14/Smad3/Vegfa/Fgf2	24
BP	GO:0019932	second-messenger-mediated signaling	30/501	455/17943	0.000497311	Lep/Atp2a2/Myoz2/Casq2/Rasd1/Tshr/Ramp1/Fhl2/Trem2/Lmcd1/Arrdc3/Prkar2b/Crhr2/Adrb2/Pf4/Edn1/Cxcr5/Pde3b/Ccr1/Tmem100/Adgre1/Ptprc/Pde4b/Ptk2b/Vegfa/Gbp1/Mt2A/Crem/Pde4d/Nos1	30
BP	GO:0014911	positive regulation of smooth muscle cell migration	10/501	66/17943	0.000510713	Retn/Agt/Igfbp5/Egr1/F3/Myc/Aif1/Cyp1b1/Pde4d/Nr4a3	10
BP	GO:1903409	reactive oxygen species biosynthetic process	14/501	128/17943	0.000510713	Ncf1/Agt/Tlr5/Cyp1a1/Acp5/Aif1/Cyp1b1/Tspo/Ddah1/Klf2/Ptk2b/Smad3/Zc3h12a/Nos1	14
BP	GO:0062012	regulation of small molecule metabolic process	26/501	366/17943	0.000510713	Lep/Adipoq/Trem2/Ier3/Myog/Agt/Pparg/Igfbp5/Dgat2/Egr1/Myc/Prox1/Tspo/Ddit4/Abcg1/Rorc/Sorbs1/Cacna1a/Ptk2b/Gpd1/Irs1/Foxo1/Ppp1r3c/Nos1/Ppargc1a/Nr4a3	26
BP	GO:0045766	positive regulation of angiogenesis	17/501	184/17943	0.000603902	C6/Cma1/Angpt4/Serpine1/Hdac9/Sfrp2/F3/Ccl24/Cyp1b1/Ddah1/Hspb1/Ptk2b/Pkm/Ago2/Vegfa/Zc3h12a/Fgf2	17
BP	GO:0016202	regulation of striated muscle tissue development	16/501	166/17943	0.000624797	Rbp4/S100b/Hdac9/Myog/Zfpm2/Adrb2/Edn1/Cxadr/Pi16/Tbx1/Mapk14/Myf6/Smad3/Pim1/Arntl/Fgf2	16
BP	GO:0015669	gas transport	6/501	21/17943	0.000626522	LOC103694857/Aqp4/Hba-a1/LOC103694855/Hba-a2/Hbb	6
BP	GO:0008016	regulation of heart contraction	17/501	185/17943	0.000626522	Myh6/Myl2/Myh7/Atp2a2/Casq2/Myl3/Csrp3/Agt/Crhr2/Adrb2/Edn1/Cxadr/Hbegf/Pde4b/Zc3h12a/Pde4d/Nos1	17
BP	GO:0030240	skeletal muscle thin filament assembly	5/501	13/17943	0.000626522	Myom3/Actc1/Prox1/Mybpc2/Myom2	5
BP	GO:0014812	muscle cell migration	13/501	114/17943	0.000626522	Adipoq/Retn/Serpine1/Agt/Igfbp5/Egr1/F3/Myc/Aif1/Cyp1b1/Pde4d/Ppargc1a/Nr4a3	13
BP	GO:0001667	ameboidal-type cell migration	28/501	417/17943	0.000642843	Pitx2/Angpt4/Bmp7/Serpine1/Hdac9/Agt/Dpp4/Pparg/Prox1/Cyp1b1/Sema4a/Jun/Ret/Gpx1/Tbx1/Hbegf/Hspb1/Mcc/Gpi/Ptk2b/Ago2/Sema7a/Vegfa/Zc3h12a/Rreb1/Adamts9/Anln/Fgf2	28
BP	GO:0010631	epithelial cell migration	22/501	287/17943	0.000691613	Angpt4/Serpine1/Hdac9/Agt/Dpp4/Pparg/Prox1/Cyp1b1/Sema4a/Jun/Gpx1/Hbegf/Hspb1/Mcc/Gpi/Ptk2b/Vegfa/Zc3h12a/Rreb1/Adamts9/Anln/Fgf2	22
BP	GO:0071347	cellular response to interleukin-1	14/501	133/17943	0.000737372	Pck1/Serpine1/Ccl2/Edn1/Ccl6/Egr1/Myc/Ccl24/Ankrd1/Aqp4/Klf2/Irak2/Zc3h12a/Gbp1	14
BP	GO:0002573	myeloid leukocyte differentiation	19/501	227/17943	0.000745387	Adipoq/Trem2/Fos/Cebpa/Tyrobp/Fasn/Pf4/Pparg/Lrrc17/Acp5/Myc/Ccr1/Jun/Pir/Fcer1g/Klf10/Mapk14/Vegfa/Rassf2	19
BP	GO:0090132	epithelium migration	22/501	289/17943	0.000753274	Angpt4/Serpine1/Hdac9/Agt/Dpp4/Pparg/Prox1/Cyp1b1/Sema4a/Jun/Gpx1/Hbegf/Hspb1/Mcc/Gpi/Ptk2b/Vegfa/Zc3h12a/Rreb1/Adamts9/Anln/Fgf2	22
BP	GO:1904705	regulation of vascular smooth muscle cell proliferation	9/501	56/17943	0.000762605	Adipoq/Cdkn1a/Agt/Pparg/Igfbp5/Edn1/Jun/Fgf2/Nr4a3	9
BP	GO:0048634	regulation of muscle organ development	16/501	170/17943	0.000775652	Rbp4/S100b/Hdac9/Myog/Zfpm2/Adrb2/Edn1/Cxadr/Pi16/Tbx1/Mapk14/Myf6/Smad3/Pim1/Arntl/Fgf2	16
BP	GO:2000377	regulation of reactive oxygen species metabolic process	18/501	209/17943	0.000810994	Lep/Ier3/Cdkn1a/Agt/Tyrobp/Tlr5/Acp5/Cryab/Aif1/Cyp1b1/Tspo/Ddah1/Klf2/Ptk2b/Mapk14/Smad3/Zc3h12a/Foxo1	18
BP	GO:0071867	response to monoamine	8/501	44/17943	0.000843222	Adipoq/Adrb2/Egr1/Pde4b/Pde4d/Nos1/Ppargc1a/Nr4a3	8
BP	GO:0071385	cellular response to glucocorticoid stimulus	13/501	118/17943	0.00084623	Pck1/Fbxo32/Serpine1/Ccl2/Crhr2/Zfp36/Edn1/Ephx1/Cyp1b1/Ddit4/RT1-Ba/Vegfa/Foxo1	13
BP	GO:0030258	lipid modification	19/501	230/17943	0.000847415	Lep/Cish/Adipoq/Scd/Pik3c2g/B3galt1/Decr1/Agt/Pparg/Cyp1a1/Dgat2/Apod/Abcg1/Ttc7a/Mapk14/Ggta1/Irs1/Ppargc1a/Nr4a3	19
BP	GO:1990874	vascular smooth muscle cell proliferation	9/501	57/17943	0.000847415	Adipoq/Cdkn1a/Agt/Pparg/Igfbp5/Edn1/Jun/Fgf2/Nr4a3	9
BP	GO:1901863	positive regulation of muscle tissue development	11/501	86/17943	0.000855016	Myog/Zfpm2/Adrb2/Edn1/Tbx1/Mapk14/Myf6/Pim1/Arntl/Fgf2/Ppargc1a	11
BP	GO:0014866	skeletal myofibril assembly	5/501	14/17943	0.000861865	Myom3/Actc1/Prox1/Mybpc2/Myom2	5
BP	GO:0071621	granulocyte chemotaxis	13/501	119/17943	0.000893599	Ccl2/Pf4/Edn1/Ccl6/Dapk2/Cxadr/Ccl24/Rarres2/Fcer1g/Pde4b/Mapk14/Vegfa/Pde4d	13
BP	GO:0032102	negative regulation of response to external stimulus	24/501	337/17943	0.000893599	Lep/Adipoq/Ier3/Slpi/Serpine1/Cdkn1a/Ccl2/Dusp1/Adrb2/Pparg/Acp5/Zfp36/Robo2/Aif1/Sema4a/Fgl2/Apod/Kremen1/Gpx1/Smad3/Sema7a/Zc3h12a/Wfdc1/Fgf2	24
BP	GO:0032496	response to lipopolysaccharide	31/501	498/17943	0.000906466	Pck1/Atp2a2/Mgst1/Trem2/Fos/Slpi/Cd6/Serpine1/Ccl2/Pf4/Tlr5/Cyp1a1/Acp5/Zfp36/Edn1/F3/Nfkbia/Tspo/Maob/Ankrd1/Jun/Cd68/Ripk2/Pde4b/Irak2/Mapk14/Zc3h12a/Noct/Pde4d/Nos1/Ppargc1a	31
BP	GO:1903706	regulation of hemopoiesis	27/501	405/17943	0.000911167	Lep/Adipoq/Fos/Tyrobp/Pf4/Lrrc17/Zfp36/Myc/Nfam1/Nfkbia/Ccr1/Jun/Ptprc/Ripk2/RT1-Ba/Rorc/Tmem176a/Zmiz1/Klf10/Ptk2b/Mapk14/Vegfa/Zc3h12a/Pim1/Fanca/Rassf2/Zbtb16	27
BP	GO:0071466	cellular response to xenobiotic stimulus	18/501	212/17943	0.000911167	Pck1/Cdo1/Casq2/Gsta4/Phgdh/Fbxo32/Serpine1/Ccl2/Cyp1a1/Egr1/Aif1/Cyp1b1/Ddit4/Gstm5/Rorc/Vegfa/Foxo1/Ppargc1a	18
BP	GO:0045428	regulation of nitric oxide biosynthetic process	10/501	72/17943	0.000916444	Agt/Tlr5/Acp5/Aif1/Tspo/Ddah1/Klf2/Ptk2b/Smad3/Zc3h12a	10
BP	GO:0000302	response to reactive oxygen species	22/501	295/17943	0.00092582	Fos/Ncf1/Serpine1/Dusp1/Edn1/F3/Cryab/Cyp1b1/Apod/Jun/Hba-a2/Klf2/Hbb/Gpx1/Hspb1/Ptk2b/Gja3/Foxo1/Ucp3/Nos1/Ppargc1a/Nr4a3	22
BP	GO:0032874	positive regulation of stress-activated MAPK cascade	16/501	174/17943	0.000934965	Lep/Eda2r/Tpd52l1/Ncf1/Crhr2/Fzd4/Edn1/Sh3rf2/Ripk2/Gadd45g/Ptpn1/Ptk2b/Vegfa/Zc3h12a/Fgd4/Rassf2	16
BP	GO:0045778	positive regulation of ossification	12/501	104/17943	0.000990489	Tp63/Bmp7/Fzd9/Cebpa/Sfrp2/Adrb2/Cebpd/Gdf10/Smad3/Vegfa/Fgf2/Zbtb16	12
BP	GO:0070304	positive regulation of stress-activated protein kinase signaling cascade	16/501	175/17943	0.000990489	Lep/Eda2r/Tpd52l1/Ncf1/Crhr2/Fzd4/Edn1/Sh3rf2/Ripk2/Gadd45g/Ptpn1/Ptk2b/Vegfa/Zc3h12a/Fgd4/Rassf2	16
BP	GO:0050900	leukocyte migration	24/501	341/17943	0.00101976	Lep/Trem2/Serpine1/Ccl2/Dusp1/Pf4/Myo1g/Edn1/Ccl6/Cxcr5/Dapk2/Cxadr/Ccl24/Aif1/Ccr1/Il33/Rarres2/Apod/Fcer1g/Pde4b/Ptk2b/Mapk14/Vegfa/Pde4d	24
BP	GO:0045667	regulation of osteoblast differentiation	14/501	139/17943	0.00103894	Tp63/Smoc1/Bmp7/Cebpa/Sfrp2/Igfbp5/Cebpd/Gdf10/Smad3/Vegfa/Noct/Rassf2/Ostn/Fgf2	14
BP	GO:0003208	cardiac ventricle morphogenesis	10/501	74/17943	0.0011177	Tnnc1/Tnni1/Myh6/Myl2/Myh7/Myl3/Sfrp2/Zfpm2/Prox1/Chd7	10
BP	GO:0060326	cell chemotaxis	22/501	300/17943	0.00114295	Serpine1/Ccl2/Dusp1/Pf4/Edn1/Ccl6/Cxcr5/Dapk2/Cxadr/Ccl24/Aif1/Ccr1/Rarres2/Fcer1g/Hbegf/Hspb1/Pde4b/Ptk2b/Mapk14/Vegfa/Fgf2/Pde4d	22
BP	GO:0006956	complement activation	9/501	60/17943	0.00115895	Cfd/C6/Cfi/C4b/C4a/C2/C1qa/Fcna/Susd4	9
BP	GO:0062013	positive regulation of small molecule metabolic process	15/501	159/17943	0.00116255	Adipoq/Trem2/Myog/Agt/Pparg/Dgat2/Myc/Abcg1/Sorbs1/Gpd1/Irs1/Foxo1/Nos1/Ppargc1a/Nr4a3	15
BP	GO:1901292	nucleoside phosphate catabolic process	14/501	141/17943	0.0011815	Ier3/Ampd3/Myog/Myc/Ddit4/Nudt4/Pde4b/LOC100362738/Gpi/Gpd1/Pkm/Nt5c1a/Pde4d/Ppargc1a	14
BP	GO:0034612	response to tumor necrosis factor	20/501	259/17943	0.00120982	Pck1/Adipoq/Ccl2/Myog/Cebpa/Zfp36/Edn1/Ccl6/Ccl24/Nfkbia/Cyp1b1/Ankrd1/Klf2/Ptk2b/Gpd1/Mapk14/Slk/Zc3h12a/Gbp1/Ppargc1a	20
BP	GO:0097237	cellular response to toxic substance	22/501	302/17943	0.00122554	Mgst1/Gstt1/Serpine1/Gstt2/Egr1/Alox5ap/F3/Myc/LOC103694857/Cyp1b1/Hba-a1/Hba-a2/Gstm5/Klf2/Gpx3/Hbb/Gpx1/Hspb1/Zc3h12a/Foxo1/Ppargc1a/Nr4a3	22
BP	GO:0032611	interleukin-1 beta production	11/501	91/17943	0.00127789	Cma1/Tyrobp/Acp5/Egr1/Lpl/Serpinb1a/Aqp4/Ripk2/Hspb1/Smad3/Zc3h12a	11
BP	GO:0071384	cellular response to corticosteroid stimulus	13/501	125/17943	0.00133089	Pck1/Fbxo32/Serpine1/Ccl2/Crhr2/Zfp36/Edn1/Ephx1/Cyp1b1/Ddit4/RT1-Ba/Vegfa/Foxo1	13
BP	GO:1905954	positive regulation of lipid localization	11/501	92/17943	0.00139897	Adipoq/Retn/Lipg/Cidea/Pparg/Edn1/Nfkbia/Lpl/Abcg1/Pltp/Zc3h12a	11
BP	GO:1901343	negative regulation of vasculature development	13/501	126/17943	0.00141861	Angpt4/Bmp7/Serpine1/Ccl2/Agt/Crhr2/Adrb2/Pf4/Pparg/Pde3b/Sema4a/Klf2/Adamts9	13
BP	GO:0010634	positive regulation of epithelial cell migration	14/501	144/17943	0.00141861	Angpt4/Serpine1/Hdac9/Agt/Prox1/Jun/Hbegf/Hspb1/Gpi/Ptk2b/Vegfa/Zc3h12a/Rreb1/Fgf2	14
BP	GO:0016052	carbohydrate catabolic process	14/501	144/17943	0.00141861	Ier3/Pygl/Myog/Gm2a/Myc/Ddit4/Neu2/Stbd1/LOC100362738/Gpi/Gpd1/Pkm/Ppp1r3c/Ppargc1a	14
BP	GO:0010830	regulation of myotube differentiation	9/501	62/17943	0.00141861	Ankrd2/Csrp3/Hdac9/Myog/Cd53/Tbx1/Neu2/Mapk14/Myf6	9
BP	GO:0060840	artery development	12/501	109/17943	0.00142828	Lep/Comp/Prrx2/Myh10/Robo2/Prox1/Tbx1/Zmiz1/Eya1/Vegfa/Adamts9/Chd7	12
BP	GO:0050920	regulation of chemotaxis	18/501	222/17943	0.00145566	Trem2/Serpine1/Ccl2/Dusp1/Edn1/Dapk2/Robo2/Aif1/Ccr1/Sema4a/Rarres2/Hspb1/Ptk2b/Mapk14/Smad3/Sema7a/Vegfa/Fgf2	18
BP	GO:0015671	oxygen transport	5/501	16/17943	0.0015028	LOC103694857/Hba-a1/LOC103694855/Hba-a2/Hbb	5
BP	GO:0016525	negative regulation of angiogenesis	12/501	110/17943	0.00153712	Angpt4/Serpine1/Ccl2/Agt/Crhr2/Adrb2/Pf4/Pparg/Pde3b/Sema4a/Klf2/Adamts9	12
BP	GO:0006094	gluconeogenesis	10/501	78/17943	0.00159497	Pck1/Lep/Adipoq/Rbp4/Dgat2/Gpi/Gpd1/Fbp2/Foxo1/Ppargc1a	10
BP	GO:0010831	positive regulation of myotube differentiation	7/501	37/17943	0.00165734	Csrp3/Myog/Cd53/Tbx1/Neu2/Mapk14/Myf6	7
BP	GO:0071383	cellular response to steroid hormone stimulus	21/501	288/17943	0.00165734	Pck1/Tp63/Fbxo32/Bmp7/Serpine1/Ccl2/Crhr2/Pparg/Zfp36/Edn1/Egr1/Ephx1/Cyp1b1/Ddit4/RT1-Ba/Rorc/Rxrg/Vegfa/Arntl/Foxo1/Nr4a3	21
BP	GO:0050921	positive regulation of chemotaxis	14/501	147/17943	0.00167143	Trem2/Serpine1/Ccl2/Edn1/Dapk2/Aif1/Ccr1/Rarres2/Hspb1/Ptk2b/Mapk14/Smad3/Vegfa/Fgf2	14
BP	GO:0003299	muscle hypertrophy in response to stress	6/501	26/17943	0.00167143	Myh6/Myh7/Atp2a2/Klf15/Smad3/Foxo1	6
BP	GO:0014898	cardiac muscle hypertrophy in response to stress	6/501	26/17943	0.00167143	Myh6/Myh7/Atp2a2/Klf15/Smad3/Foxo1	6
BP	GO:0032373	positive regulation of sterol transport	6/501	26/17943	0.00167143	Adipoq/Lipg/Pparg/Nfkbia/Abcg1/Pltp	6
BP	GO:0032376	positive regulation of cholesterol transport	6/501	26/17943	0.00167143	Adipoq/Lipg/Pparg/Nfkbia/Abcg1/Pltp	6
BP	GO:0032651	regulation of interleukin-1 beta production	10/501	79/17943	0.00170547	Tyrobp/Acp5/Egr1/Lpl/Serpinb1a/Aqp4/Ripk2/Hspb1/Smad3/Zc3h12a	10
BP	GO:0045926	negative regulation of growth	21/501	290/17943	0.0017623	Scd/Myl2/Rbp4/Rrad/Fhl1/Cdkn1a/Plac8/Agt/Sfrp2/Adrb2/Pparg/Igfbp5/Cgref1/Cxadr/Pi16/Cryab/Sema4a/Smad3/Sema7a/Mt2A/Ostn	21
BP	GO:0048638	regulation of developmental growth	26/501	403/17943	0.00177393	Lep/Myh6/Rbp4/Tshr/Serpine1/Cdkn1a/Plac8/Agt/Sfrp2/Zfpm2/Adrb2/Colq/Edn1/Cxadr/Pi16/Prox1/Sema4a/Map1b/Mapk14/Sema7a/Vegfa/Cacng7/Pim1/Ostn/Fgf2/Chd7	26
BP	GO:0019319	hexose biosynthetic process	10/501	80/17943	0.00187137	Pck1/Lep/Adipoq/Rbp4/Dgat2/Gpi/Gpd1/Fbp2/Foxo1/Ppargc1a	10
BP	GO:0070555	response to interleukin-1	15/501	168/17943	0.00188432	Pck1/Serpine1/Ccl2/Edn1/Ccl6/Egr1/Myc/Ccl24/Ankrd1/Aqp4/Ripk2/Klf2/Irak2/Zc3h12a/Gbp1	15
BP	GO:0038066	p38MAPK cascade	8/501	51/17943	0.00190475	Lep/Ncf1/Dusp1/Zfp36/Gadd45g/Mapk14/Vegfa/Zc3h12a	8
BP	GO:0010875	positive regulation of cholesterol efflux	5/501	17/17943	0.00190869	Adipoq/Pparg/Nfkbia/Abcg1/Pltp	5
BP	GO:0006109	regulation of carbohydrate metabolic process	16/501	188/17943	0.00191829	Lep/Adipoq/Ier3/Myog/Igfbp5/Dgat2/Myc/Ddit4/Rorc/Sorbs1/Ptk2b/Gpd1/Irs1/Foxo1/Ppp1r3c/Ppargc1a	16
BP	GO:0048511	rhythmic process	25/501	383/17943	0.00195046	Lep/Adipoq/Retn/Agt/Adrb2/Pparg/Fzd4/Egr1/Kcna2/Egr2/Robo2/Gdf10/Prox1/Cyp1b1/Jun/Rorc/Dbp/Klf10/Gpr157/Nfil3/Opn4/Arntl/Noct/Crem/Ppargc1a	25
BP	GO:0010632	regulation of epithelial cell migration	18/501	229/17943	0.00195046	Angpt4/Serpine1/Hdac9/Agt/Pparg/Prox1/Sema4a/Jun/Hbegf/Hspb1/Mcc/Gpi/Ptk2b/Vegfa/Zc3h12a/Rreb1/Adamts9/Fgf2	18
BP	GO:0032680	regulation of tumor necrosis factor production	15/501	169/17943	0.00195046	Lep/Adipoq/Ccl2/Cidea/Tyrobp/Pf4/Acp5/Zfp36/Lpl/Tspo/Ptprc/Fcer1g/Ripk2/Hspb1/Zc3h12a	15
BP	GO:0150063	visual system development	27/501	430/17943	0.00195046	Rbp4/Pitx2/Smoc1/Bmp7/Cyp1a1/Fzd4/Myh10/Aldh1a3/Mdm1/Cryab/C1qa/Prox1/Cyp1b1/Arl6/Jun/Ret/Max/Myom2/Mab21l1/Smad3/Vegfa/Maf/Slc25a25/Lhx2/Fgf2/Ush1c/Chd7	27
BP	GO:2000181	negative regulation of blood vessel morphogenesis	12/501	114/17943	0.00195246	Angpt4/Serpine1/Ccl2/Agt/Crhr2/Adrb2/Pf4/Pparg/Pde3b/Sema4a/Klf2/Adamts9	12
BP	GO:0014887	cardiac muscle adaptation	6/501	27/17943	0.00195246	Myh6/Myh7/Atp2a2/Klf15/Smad3/Foxo1	6
BP	GO:0009166	nucleotide catabolic process	13/501	132/17943	0.00197436	Ier3/Ampd3/Myog/Myc/Ddit4/Nudt4/Pde4b/LOC100362738/Gpi/Gpd1/Pkm/Pde4d/Ppargc1a	13
BP	GO:1903522	regulation of blood circulation	19/501	251/17943	0.00200188	Lep/Myh6/Myl2/Myh7/Atp2a2/Casq2/Myl3/Csrp3/Agt/Crhr2/Adrb2/Edn1/Cxadr/Alox5/Hbegf/Pde4b/Zc3h12a/Pde4d/Nos1	19
BP	GO:0050879	multicellular organismal movement	9/501	66/17943	0.00200188	Tnnc1/Tnnt1/Myh7/Atp2a2/Comp/Chrnd/Adrb2/Myh3/Cacna1a	9
BP	GO:0050881	musculoskeletal movement	9/501	66/17943	0.00200188	Tnnc1/Tnnt1/Myh7/Atp2a2/Comp/Chrnd/Adrb2/Myh3/Cacna1a	9
BP	GO:0014823	response to activity	13/501	133/17943	0.00209224	Pck1/Lep/Adipoq/Ccl2/Myog/Agt/Edn1/Sorbs1/Slc25a25/Irs1/Ucp3/Nos1/Ppargc1a	13
BP	GO:0003151	outflow tract morphogenesis	10/501	82/17943	0.00211609	Pitx2/Bmp7/Sfrp2/Zfpm2/Robo2/Tbx3/Jun/Tbx1/Eya1/Vegfa	10
BP	GO:0031669	cellular response to nutrient levels	20/501	274/17943	0.00211609	Pck1/Lep/Serpine1/Cdkn1a/Ccl2/Pparg/Folr2/Lpl/Jun/Cd68/Ppp1r15a/Kcnb1/Ctsl/Cib2/Max/Klf10/Zc3h12a/Slc38a3/Pim1/Foxo1	20
BP	GO:1903555	regulation of tumor necrosis factor superfamily cytokine production	15/501	171/17943	0.00211609	Lep/Adipoq/Ccl2/Cidea/Tyrobp/Pf4/Acp5/Zfp36/Lpl/Tspo/Ptprc/Fcer1g/Ripk2/Hspb1/Zc3h12a	15
BP	GO:0032355	response to estradiol	19/501	253/17943	0.00214668	Lep/Bmp7/Ccl2/Myog/Agt/Sfrp4/Dusp1/F3/Myc/Cryab/Cyp1b1/Aqp4/Hba-a2/Gpx1/Gpi/Map1b/Vegfa/Wfdc1/Ppargc1a	19
BP	GO:0048880	sensory system development	27/501	434/17943	0.00214668	Rbp4/Pitx2/Smoc1/Bmp7/Cyp1a1/Fzd4/Myh10/Aldh1a3/Mdm1/Cryab/C1qa/Prox1/Cyp1b1/Arl6/Jun/Ret/Max/Myom2/Mab21l1/Smad3/Vegfa/Maf/Slc25a25/Lhx2/Fgf2/Ush1c/Chd7	27
BP	GO:0019915	lipid storage	9/501	67/17943	0.002172	Lep/Cidea/Pparg/Dgat2/Gm2a/Nfkbia/Lpl/Abcg1/Zc3h12a	9
BP	GO:0042593	glucose homeostasis	22/501	319/17943	0.002172	Pck1/Lep/Adipoq/Rbp4/Csrp3/Cma1/Pygl/Serpine1/Ccl2/Cebpa/Crhr2/Pparg/Igfbp5/Pde3b/Aqp4/Kcnb1/Klf15/Gpx1/Cacna1a/Gpi/Foxo1/Ppargc1a	22
BP	GO:0032640	tumor necrosis factor production	15/501	172/17943	0.00220726	Lep/Adipoq/Ccl2/Cidea/Tyrobp/Pf4/Acp5/Zfp36/Lpl/Tspo/Ptprc/Fcer1g/Ripk2/Hspb1/Zc3h12a	15
BP	GO:0033500	carbohydrate homeostasis	22/501	320/17943	0.00225191	Pck1/Lep/Adipoq/Rbp4/Csrp3/Cma1/Pygl/Serpine1/Ccl2/Cebpa/Crhr2/Pparg/Igfbp5/Pde3b/Aqp4/Kcnb1/Klf15/Gpx1/Cacna1a/Gpi/Foxo1/Ppargc1a	22
BP	GO:0061900	glial cell activation	8/501	53/17943	0.00225604	Trem2/Agt/Tyrobp/Pparg/C1qa/Il33/Jun/Mt2A	8
BP	GO:0060419	heart growth	12/501	117/17943	0.00231681	Myh6/Myl2/Rbp4/Agt/Zfpm2/Edn1/Cxadr/Pi16/Prox1/Mapk14/Pim1/Fgf2	12
BP	GO:0070371	ERK1 and ERK2 cascade	23/501	344/17943	0.00236274	Adipoq/Trem2/Ccl2/Agt/Crhr2/Dusp1/Ccl6/Pla2g2a/Myc/Ccl24/Ccr1/Jun/Ptprc/Ripk2/Ptpn1/Dusp4/Ptk2b/Sema7a/Vegfa/Gbp1/Fgf2/Nek10/Ntsr2	23
BP	GO:0033275	actin-myosin filament sliding	4/501	10/17943	0.0023824	Tnnc1/Myh6/Myh7/Actc1	4
BP	GO:0060872	semicircular canal development	4/501	10/17943	0.0023824	Tbx1/Eya1/Chd7/Nr4a3	4
BP	GO:0009266	response to temperature stimulus	18/501	235/17943	0.00242312	Myh6/Atp2a2/Fos/Ier5/Cdkn1a/Ccl2/Plac8/Agt/Adrb2/Pparg/F3/Hspb7/Lpl/Pde4b/Vegfa/Ucp3/Nos1/Ppargc1a	18
BP	GO:1990868	response to chemokine	10/501	84/17943	0.00243346	Trem2/Ccl2/Dusp1/Pf4/Ccl6/Cxcr5/Ccl24/Ccr1/Ptk2b/Zc3h12a	10
BP	GO:1990869	cellular response to chemokine	10/501	84/17943	0.00243346	Trem2/Ccl2/Dusp1/Pf4/Ccl6/Cxcr5/Ccl24/Ccr1/Ptk2b/Zc3h12a	10
BP	GO:0098754	detoxification	12/501	118/17943	0.00243648	Mgst1/Gstt1/Gstt2/Alox5ap/LOC103694857/Hba-a1/Hba-a2/Gstm5/Gpx3/Hbb/Gpx1/Mt2A	12
BP	GO:0071548	response to dexamethasone	11/501	101/17943	0.00250995	Pck1/Fbxo32/Serpine1/Ccl2/Cebpa/Adrb2/Edn1/Cyp1b1/Ddit4/Vegfa/Foxo1	11
BP	GO:0071706	tumor necrosis factor superfamily cytokine production	15/501	175/17943	0.00253806	Lep/Adipoq/Ccl2/Cidea/Tyrobp/Pf4/Acp5/Zfp36/Lpl/Tspo/Ptprc/Fcer1g/Ripk2/Hspb1/Zc3h12a	15
BP	GO:0007498	mesoderm development	12/501	119/17943	0.00258893	Tp63/Bmp7/Sfrp2/Tbx3/Tbx1/Eya1/Gpi/Smad3/Vegfa/Six2/Lhx2/Nr4a3	12
BP	GO:1990776	response to angiotensin	7/501	41/17943	0.00258893	Myh7/Serpine1/Agt/Myc/Hspb1/Camk2a/Irs1	7
BP	GO:0045844	positive regulation of striated muscle tissue development	10/501	85/17943	0.00258893	Myog/Zfpm2/Adrb2/Edn1/Tbx1/Mapk14/Myf6/Pim1/Arntl/Fgf2	10
BP	GO:0048636	positive regulation of muscle organ development	10/501	85/17943	0.00258893	Myog/Zfpm2/Adrb2/Edn1/Tbx1/Mapk14/Myf6/Pim1/Arntl/Fgf2	10
BP	GO:0060420	regulation of heart growth	10/501	85/17943	0.00258893	Myh6/Rbp4/Zfpm2/Edn1/Cxadr/Pi16/Prox1/Mapk14/Pim1/Fgf2	10
BP	GO:0060143	positive regulation of syncytium formation by plasma membrane fusion	6/501	29/17943	0.00258893	Trem2/Myog/Tyrobp/Cd53/Mapk14/Myf6	6
BP	GO:0044706	multi-multicellular organism process	22/501	325/17943	0.00259961	Lep/Fosb/Fos/Endou/Serpine1/Ccl2/Agt/Sfrp4/Adrb2/Igfbp5/Cyp1a1/Edn1/Alas2/Aqp4/Fgl2/Ctsl/Hspb1/Ago2/Vegfa/Slc38a3/Arntl/Nos1	22
BP	GO:0046364	monosaccharide biosynthetic process	10/501	86/17943	0.00281511	Pck1/Lep/Adipoq/Rbp4/Dgat2/Gpi/Gpd1/Fbp2/Foxo1/Ppargc1a	10
BP	GO:0010743	regulation of macrophage derived foam cell differentiation	5/501	19/17943	0.00281511	Adipoq/Pf4/Pparg/Nfkbia/Lpl	5
BP	GO:0071871	response to epinephrine	5/501	19/17943	0.00281511	Adipoq/Pde4b/Pde4d/Nos1/Ppargc1a	5
BP	GO:0016051	carbohydrate biosynthetic process	16/501	198/17943	0.00290021	Pck1/Lep/Adipoq/Rbp4/B3galt1/Dgat2/Gbe1/Sorbs1/Gpi/Ptk2b/Gpd1/Irs1/Fbp2/Foxo1/Ppp1r3c/Ppargc1a	16
BP	GO:0030282	bone mineralization	12/501	121/17943	0.00290348	Lep/Comp/Bmp7/Fzd9/Adrb2/Ccr1/Asgr2/Clec3b/Phospho1/Klf10/Ptk2b/Smad3	12
BP	GO:0010883	regulation of lipid storage	7/501	42/17943	0.00290348	Lep/Cidea/Pparg/Nfkbia/Lpl/Abcg1/Zc3h12a	7
BP	GO:0071869	response to catecholamine	7/501	42/17943	0.00290348	Adipoq/Egr1/Pde4b/Pde4d/Nos1/Ppargc1a/Nr4a3	7
BP	GO:0010675	regulation of cellular carbohydrate metabolic process	14/501	159/17943	0.00299654	Lep/Adipoq/Ier3/Myog/Igfbp5/Dgat2/Ddit4/Rorc/Sorbs1/Ptk2b/Irs1/Foxo1/Ppp1r3c/Ppargc1a	14
BP	GO:1900076	regulation of cellular response to insulin stimulus	10/501	87/17943	0.003016	Lep/Cish/Agt/Pparg/Lpl/Rarres2/Sorbs1/Ptpn1/Irs1/Mzb1	10
BP	GO:2000278	regulation of DNA biosynthetic process	12/501	122/17943	0.00309037	Adipoq/Cdkn1a/Crhr2/Dusp1/Pparg/Dach1/Myc/Cyp1b1/Ankrd1/Ptk2b/Vegfa/Fgf2	12
BP	GO:0044242	cellular lipid catabolic process	16/501	200/17943	0.0031643	Pck1/Lep/Adipoq/Ces1d/Lipg/Pla2g4e/Decr1/Gm2a/Cyp1b1/Lpl/Pla2g15/Neu2/Ddhd2/Irs1/Cyp4f18/Lpin1	16
BP	GO:0043010	camera-type eye development	24/501	377/17943	0.0031707	Rbp4/Pitx2/Bmp7/Cyp1a1/Fzd4/Myh10/Aldh1a3/Mdm1/Cryab/Prox1/Cyp1b1/Arl6/Jun/Ret/Max/Myom2/Mab21l1/Smad3/Vegfa/Maf/Slc25a25/Lhx2/Ush1c/Chd7	24
BP	GO:0048010	vascular endothelial growth factor receptor signaling pathway	7/501	43/17943	0.00329543	Ccl2/Fzd4/Hspb1/Ptpn1/Ptk2b/Mapk14/Vegfa	7
BP	GO:0071398	cellular response to fatty acid	9/501	72/17943	0.00329543	Ccl2/Pparg/Edn1/Dgat2/Lpl/Hspb1/Zc3h12a/Irs1/Ppargc1a	9
BP	GO:0046434	organophosphate catabolic process	16/501	201/17943	0.00329567	Ier3/Pla2g4e/Ampd3/Myog/Myc/Ddit4/Pla2g15/Nudt4/Pde4b/LOC100362738/Gpi/Gpd1/Pkm/Nt5c1a/Pde4d/Ppargc1a	16
BP	GO:0001505	regulation of neurotransmitter levels	25/501	402/17943	0.00329567	Slc36a2/Atp2a2/Sncg/Slc1a3/Phgdh/Bche/Agt/Adrb2/Colq/Tlr5/Acp5/Aif1/Cyp1b1/Tspo/Maob/Ddah1/Klf2/Camk2a/Shmt1/Cacna1a/Ptk2b/Smad3/Zc3h12a/Nos1/Prima1	25
BP	GO:0010463	mesenchymal cell proliferation	8/501	57/17943	0.00329618	Tp63/Bmp7/Prrx2/Myc/Tbx1/Vegfa/Six2/Irs1	8
BP	GO:0001654	eye development	26/501	427/17943	0.00340741	Rbp4/Pitx2/Smoc1/Bmp7/Cyp1a1/Fzd4/Myh10/Aldh1a3/Mdm1/Cryab/Prox1/Cyp1b1/Arl6/Jun/Ret/Max/Myom2/Mab21l1/Smad3/Vegfa/Maf/Slc25a25/Lhx2/Fgf2/Ush1c/Chd7	26
BP	GO:0097530	granulocyte migration	13/501	143/17943	0.00356248	Ccl2/Pf4/Edn1/Ccl6/Dapk2/Cxadr/Ccl24/Rarres2/Fcer1g/Pde4b/Mapk14/Vegfa/Pde4d	13
BP	GO:0002532	production of molecular mediator involved in inflammatory response	9/501	73/17943	0.00356637	Lep/Cd6/Serpine1/Alox5ap/Alox5/Apod/Fcer1g/Mapk14/Zc3h12a	9
BP	GO:0009409	response to cold	9/501	73/17943	0.00356637	Fos/Plac8/Agt/Adrb2/Pparg/Lpl/Vegfa/Ucp3/Ppargc1a	9
BP	GO:0043542	endothelial cell migration	16/501	203/17943	0.00359309	Angpt4/Hdac9/Agt/Dpp4/Pparg/Prox1/Cyp1b1/Sema4a/Gpx1/Hspb1/Gpi/Ptk2b/Vegfa/Zc3h12a/Adamts9/Fgf2	16
BP	GO:0002253	activation of immune response	25/501	405/17943	0.0035934	Cfd/C6/Cfi/C4b/C4a/Vtcn1/Tlr5/C2/Myo1g/Nfam1/C1qa/Fcna/Nfkbia/Cmtm3/Irf7/Ptprc/Fcer1g/Ripk2/Pde4b/Irak2/Susd4/Zc3h12a/Gbp1/Pde4d/Nr4a3	25
BP	GO:0031214	biomineral tissue development	14/501	163/17943	0.00364494	Lep/Comp/Bmp7/Fzd9/Adrb2/Ccr1/Asgr2/Clec3b/Tbx1/Phospho1/Klf10/Ptk2b/Smad3/Foxo1	14
BP	GO:0014902	myotube differentiation	12/501	125/17943	0.00364494	Ankrd2/Pitx2/Csrp3/Hdac9/Myog/Barx2/Cd53/Gpx1/Tbx1/Neu2/Mapk14/Myf6	12
BP	GO:0030048	actin filament-based movement	11/501	107/17943	0.00364494	Tnnc1/Myh6/Myh7/Scn1a/Casq2/Myh10/Actc1/Pde4b/Myo19/Pde4d/Nos1	11
BP	GO:1990748	cellular detoxification	11/501	107/17943	0.00364494	Mgst1/Gstt1/Gstt2/Alox5ap/LOC103694857/Hba-a1/Hba-a2/Gstm5/Gpx3/Hbb/Gpx1	11
BP	GO:0043279	response to alkaloid	15/501	184/17943	0.00381142	Fosb/Casq2/Sncg/Bche/Pparg/Egr1/Myc/Aif1/Ppp1r15a/Gpi/Ptk2b/Irs1/Nos1/Ppargc1a/En1	15
BP	GO:0030198	extracellular matrix organization	19/501	269/17943	0.00381142	Comp/Mmp27/Cma1/Smoc1/Tnfrsf11b/Agt/Sfrp2/Dpp4/Colq/Ccdc80/Adamts20/Mmp23/Cyp1b1/Lcp1/Col22a1/Smad3/Col19a1/Adamts9/Lamb3	19
BP	GO:0051155	positive regulation of striated muscle cell differentiation	9/501	74/17943	0.00381142	Csrp3/Myog/Edn1/Prox1/Cd53/Tbx1/Neu2/Mapk14/Myf6	9
BP	GO:0072376	protein activation cascade	9/501	74/17943	0.00381142	Cfd/C6/Cfi/C4b/C4a/C2/C1qa/Fcna/Susd4	9
BP	GO:0051153	regulation of striated muscle cell differentiation	12/501	126/17943	0.00383007	Ankrd2/Csrp3/Hdac9/Myog/Edn1/Pi16/Prox1/Cd53/Tbx1/Neu2/Mapk14/Myf6	12
BP	GO:0071346	cellular response to interferon-gamma	12/501	126/17943	0.00383007	Ccl2/Gbp4/Pparg/Edn1/Ccl6/Cdc42ep2/Myc/Ccl24/Aif1/Aqp4/Gbp1/Dapk1	12
BP	GO:0045860	positive regulation of protein kinase activity	28/501	481/17943	0.00386158	Lep/Adipoq/Tpd52l1/Ncf1/Angpt4/Cdkn1a/Agt/Adrb2/Fzd4/Edn1/Egr1/Map3k14/Prox1/Ret/Ptprc/Ripk2/Gadd45g/Neurl1/Ptpn1/Ptk2b/Slk/Vegfa/Tpx2/Fgd4/Pim1/Rassf2/Fgf2/Nek10	28
BP	GO:0045661	regulation of myoblast differentiation	8/501	59/17943	0.00391583	Ankrd2/Csrp3/Myog/Tbx3/Neu2/Mapk14/Myf6/Nmrk2	8
BP	GO:0015850	organic hydroxy compound transport	19/501	270/17943	0.00391583	Lep/Adipoq/Rbp4/Aqp7/Sncg/Lipg/Agt/Crhr2/Pparg/Kcna2/Myc/Nfkbia/Maob/Fcer1g/Kcnb1/Abcg1/Pltp/Slc16a3/Nos1	19
BP	GO:0010827	regulation of glucose transmembrane transport	10/501	91/17943	0.00393225	Lep/Adipoq/Edn1/Myc/Klf15/Sorbs1/Mapk14/Irs1/Ostn/Nr4a3	10
BP	GO:0003231	cardiac ventricle development	13/501	146/17943	0.00407124	Tnnc1/Tnni1/Myh6/Myl2/Myh7/Pitx2/Myl3/Sfrp2/Zfpm2/Robo2/Prox1/Tbx3/Chd7	13
BP	GO:0032612	interleukin-1 production	11/501	109/17943	0.00410455	Cma1/Tyrobp/Acp5/Egr1/Lpl/Serpinb1a/Aqp4/Ripk2/Hspb1/Smad3/Zc3h12a	11
BP	GO:0002690	positive regulation of leukocyte chemotaxis	10/501	92/17943	0.00425645	Serpine1/Ccl2/Edn1/Dapk2/Aif1/Ccr1/Rarres2/Ptk2b/Mapk14/Vegfa	10
BP	GO:0070542	response to fatty acid	12/501	128/17943	0.00429218	Adipoq/Scd/Ccl2/Pparg/Edn1/Dgat2/Lpl/Alas2/Hspb1/Zc3h12a/Irs1/Ppargc1a	12
BP	GO:0046884	follicle-stimulating hormone secretion	4/501	12/17943	0.00429218	Lep/Crhr2/Tbx3/Inha	4
BP	GO:0061448	connective tissue development	20/501	295/17943	0.00429218	Lep/Comp/Chad/Arrdc3/Bmp7/Sfrp2/Prrx2/Edn1/Dgat2/Egr1/Barx2/Rorc/Mapk14/Smad3/Maf/Six2/Slc25a25/Fgf2/Zbtb16/Ppargc1a	20
BP	GO:1902105	regulation of leukocyte differentiation	20/501	295/17943	0.00429218	Adipoq/Fos/Tyrobp/Pf4/Lrrc17/Myc/Nfam1/Ccr1/Jun/Ptprc/Ripk2/RT1-Ba/Rorc/Tmem176a/Zmiz1/Klf10/Zc3h12a/Fanca/Rassf2/Zbtb16	20
BP	GO:0014743	regulation of muscle hypertrophy	9/501	76/17943	0.00442563	Lmcd1/Fbxo32/Agt/Igfbp5/Edn1/Pi16/Smad3/Foxo1/Nr4a3	9
BP	GO:0048844	artery morphogenesis	9/501	76/17943	0.00442563	Comp/Prrx2/Prox1/Tbx1/Zmiz1/Eya1/Vegfa/Adamts9/Chd7	9
BP	GO:0043277	apoptotic cell clearance	7/501	46/17943	0.00448457	Trem2/C4b/C4a/Ccl2/Tyrobp/C2/Fcna	7
BP	GO:0055094	response to lipoprotein particle	6/501	33/17943	0.00453394	Serpine1/Pparg/F3/Lpl/Cd68/Fcer1g	6
BP	GO:0098739	import across plasma membrane	11/501	111/17943	0.00464509	Slc36a2/Slc1a3/Slc39a8/Agt/Adrb2/Slc1a5/Folr2/Atp1b2/Kcnj12/Slc9a5/Slc2a5	11
BP	GO:0090183	regulation of kidney development	8/501	61/17943	0.00470748	Adipoq/Bmp7/Agt/Egr1/Myc/Ret/Vegfa/Six2	8
BP	GO:0042246	tissue regeneration	10/501	94/17943	0.00486507	Serpine1/Cdkn1a/Fzd9/Myog/Gap43/Apod/Gpx1/Mapk14/Pkm/Myf6	10
BP	GO:0046031	ADP metabolic process	10/501	94/17943	0.00486507	Ier3/Ampd3/Myog/Myc/Ddit4/LOC100362738/Gpi/Gpd1/Pkm/Ppargc1a	10
BP	GO:0009743	response to carbohydrate	22/501	345/17943	0.00491698	Pck1/Lep/Adipoq/Nnat/Cma1/Serpine1/Ccl2/Crhr2/Acp5/Egr1/Pde3b/Myc/Aqp4/Ppp1r15a/Kcnb1/Gpx1/Ctsl/Ptk2b/Map1b/Mapk14/Slc2a5/Ppargc1a	22
BP	GO:0019221	cytokine-mediated signaling pathway	23/501	369/17943	0.0049498	Lep/Cish/Adipoq/Trem2/Ccl2/Cebpa/Pf4/Pparg/Fzd4/Ccl6/Egr1/Cxcr5/F3/Ccl24/Nfkbia/Grem2/Ccr1/Irf7/Ptprc/Fcer1g/Ripk2/Irak2/Ptk2b	23
BP	GO:0032371	regulation of sterol transport	7/501	47/17943	0.0049498	Lep/Adipoq/Lipg/Pparg/Nfkbia/Abcg1/Pltp	7
BP	GO:0032374	regulation of cholesterol transport	7/501	47/17943	0.0049498	Lep/Adipoq/Lipg/Pparg/Nfkbia/Abcg1/Pltp	7
BP	GO:0045429	positive regulation of nitric oxide biosynthetic process	7/501	47/17943	0.0049498	Agt/Tlr5/Aif1/Ddah1/Klf2/Ptk2b/Smad3	7
BP	GO:0046685	response to arsenic-containing substance	7/501	47/17943	0.0049498	Tnfrsf11b/Cdkn1a/Zfand2a/Cyp1a1/Myc/Cyp1b1/Zc3h12a	7
BP	GO:0150076	neuroinflammatory response	8/501	62/17943	0.00511234	Trem2/Agt/Tyrobp/Pparg/C1qa/Il33/Jun/Mt2A	8
BP	GO:0060142	regulation of syncytium formation by plasma membrane fusion	6/501	34/17943	0.00513923	Trem2/Myog/Tyrobp/Cd53/Mapk14/Myf6	6
BP	GO:1904385	cellular response to angiotensin	6/501	34/17943	0.00513923	Myh7/Serpine1/Agt/Myc/Camk2a/Irs1	6
BP	GO:0006090	pyruvate metabolic process	11/501	113/17943	0.00518959	Pck1/Ier3/Myog/Myc/Ddit4/LOC100362738/Gpi/Gpd1/Pkm/Ppargc1a/Nr4a3	11
BP	GO:0034404	nucleobase-containing small molecule biosynthetic process	14/501	171/17943	0.00519828	Ier3/Ampd3/Myog/Myc/Ddit4/Nudt4/Pde4b/LOC100362738/Gpi/Gpd1/Pkm/Nt5c1a/Pde4d/Ppargc1a	14
BP	GO:0070372	regulation of ERK1 and ERK2 cascade	21/501	324/17943	0.00519828	Adipoq/Trem2/Ccl2/Crhr2/Dusp1/Ccl6/Pla2g2a/Ccl24/Ccr1/Jun/Ptprc/Ripk2/Ptpn1/Dusp4/Ptk2b/Sema7a/Vegfa/Gbp1/Fgf2/Nek10/Ntsr2	21
BP	GO:0030593	neutrophil chemotaxis	10/501	96/17943	0.00538454	Ccl2/Pf4/Edn1/Ccl6/Dapk2/Cxadr/Ccl24/Fcer1g/Pde4b/Pde4d	10
BP	GO:0032652	regulation of interleukin-1 production	10/501	96/17943	0.00538454	Tyrobp/Acp5/Egr1/Lpl/Serpinb1a/Aqp4/Ripk2/Hspb1/Smad3/Zc3h12a	10
BP	GO:0098869	cellular oxidant detoxification	10/501	96/17943	0.00538454	Mgst1/Gstt1/Gstt2/Alox5ap/LOC103694857/Hba-a1/Hba-a2/Gpx3/Hbb/Gpx1	10
BP	GO:0040013	negative regulation of locomotion	22/501	349/17943	0.00538454	Adipoq/Arrdc3/Angpt4/Serpine1/Ccl2/Sfrp2/Dusp1/Pparg/Dach1/Igfbp5/Robo2/Aif1/Cyp1b1/Il33/Sema4a/Apod/Mcc/Sema7a/Srgap3/Adamts9/Fgf2/Ppargc1a	22
BP	GO:0071300	cellular response to retinoic acid	9/501	79/17943	0.00538454	Pck1/Lep/Ccl2/Myog/Pparg/Myc/Ret/Tbx1/Ptk2b	9
BP	GO:0071674	mononuclear cell migration	9/501	79/17943	0.00538454	Serpine1/Ccl2/Dusp1/Ccl6/Ccl24/Aif1/Ccr1/Rarres2/Mapk14	9
BP	GO:0072332	intrinsic apoptotic signaling pathway by p53 class mediator	9/501	79/17943	0.00538454	Tp63/Eda2r/Ankrd2/Zfp385a/Zfp385b/Cdkn1a/Ddit4/Tp53bp2/Ppp1r13b	9
BP	GO:0034375	high-density lipoprotein particle remodeling	4/501	13/17943	0.00538454	Lipg/Lpl/Abcg1/Pltp	4
BP	GO:0045820	negative regulation of glycolytic process	4/501	13/17943	0.00538454	Ier3/Myog/Ddit4/Ppargc1a	4
BP	GO:0050746	regulation of lipoprotein metabolic process	4/501	13/17943	0.00538454	Lep/Lipg/Dgat2/Apod	4
BP	GO:0055015	ventricular cardiac muscle cell development	4/501	13/17943	0.00538454	Pitx2/Fhl2/Myh10/Prox1	4
BP	GO:0071872	cellular response to epinephrine stimulus	4/501	13/17943	0.00538454	Adipoq/Pde4b/Pde4d/Nos1	4
BP	GO:0072216	positive regulation of metanephros development	4/501	13/17943	0.00538454	Adipoq/Egr1/Myc/Ret	4
BP	GO:0002250	adaptive immune response	23/501	374/17943	0.00556514	C6/Cfi/C4b/C4a/Vtcn1/Dpp4/C2/Myo1g/C1qa/Il33/Sema4a/Fgl2/Irf7/Adgre1/Ptprc/Fcer1g/Ripk2/Rorc/Ctsl/Susd4/Ptk2b/Vegfa/Zc3h12a	23
BP	GO:1905952	regulation of lipid localization	13/501	153/17943	0.0055652	Lep/Adipoq/Retn/Lipg/Cidea/Agt/Pparg/Edn1/Nfkbia/Lpl/Abcg1/Pltp/Zc3h12a	13
BP	GO:0010742	macrophage derived foam cell differentiation	5/501	23/17943	0.0055652	Adipoq/Pf4/Pparg/Nfkbia/Lpl	5
BP	GO:0071404	cellular response to low-density lipoprotein particle stimulus	5/501	23/17943	0.0055652	Serpine1/Pparg/F3/Lpl/Fcer1g	5
BP	GO:0090077	foam cell differentiation	5/501	23/17943	0.0055652	Adipoq/Pf4/Pparg/Nfkbia/Lpl	5
BP	GO:0042542	response to hydrogen peroxide	15/501	194/17943	0.00559594	Serpine1/Dusp1/F3/Cryab/Cyp1b1/Jun/Hba-a2/Klf2/Hbb/Gpx1/Hspb1/Ptk2b/Gja3/Foxo1/Nr4a3	15
BP	GO:0001823	mesonephros development	11/501	115/17943	0.00562308	Bmp7/Agt/Robo2/Myc/Ret/Eya1/Smad3/Vegfa/Six2/Fgf2/Zbtb16	11
BP	GO:0048639	positive regulation of developmental growth	16/501	216/17943	0.00580091	Lep/Tshr/Serpine1/Agt/Zfpm2/Adrb2/Edn1/Prox1/Map1b/Mapk14/Sema7a/Vegfa/Cacng7/Pim1/Fgf2/Chd7	16
BP	GO:0031100	animal organ regeneration	13/501	154/17943	0.00580091	Cdkn1a/Ccl2/Cebpa/Adrb2/Pparg/Myc/Prps2/Nfkbia/Alas2/Lcp1/Pkm/Lpin1/Nr4a3	13
BP	GO:0034341	response to interferon-gamma	13/501	154/17943	0.00580091	Ccl2/Gbp4/Pparg/Edn1/Ccl6/Cdc42ep2/Myc/Ccl24/Aif1/Aqp4/RT1-Ba/Gbp1/Dapk1	13
BP	GO:0032412	regulation of ion transmembrane transporter activity	18/501	260/17943	0.00580091	Casq2/Trem2/Rrad/Fhl1/Ccl2/Adrb2/Alox5/Fxyd6/Sln/Pde4b/Cacna1a/Ptk2b/Atp1b2/Kcnc1/Cacng7/Dapk1/Pde4d/Ppargc1a	18
BP	GO:0003009	skeletal muscle contraction	7/501	49/17943	0.00580527	Tnnc1/Tnnt1/Myh7/Atp2a2/Chrnd/Adrb2/Myh3	7
BP	GO:1904407	positive regulation of nitric oxide metabolic process	7/501	49/17943	0.00580527	Agt/Tlr5/Aif1/Ddah1/Klf2/Ptk2b/Smad3	7
BP	GO:0045927	positive regulation of growth	20/501	306/17943	0.00589684	Lep/Lgi1/Tshr/Serpine1/Agt/Sfrp2/Zfpm2/Adrb2/Edn1/Prox1/Hbegf/Ptk2b/Map1b/Mapk14/Sema7a/Vegfa/Cacng7/Pim1/Fgf2/Chd7	20
BP	GO:0002688	regulation of leukocyte chemotaxis	11/501	116/17943	0.00591012	Serpine1/Ccl2/Dusp1/Edn1/Dapk2/Aif1/Ccr1/Rarres2/Ptk2b/Mapk14/Vegfa	11
BP	GO:0010595	positive regulation of endothelial cell migration	10/501	98/17943	0.00596709	Angpt4/Hdac9/Agt/Prox1/Hspb1/Gpi/Ptk2b/Vegfa/Zc3h12a/Fgf2	10
BP	GO:1903531	negative regulation of secretion by cell	17/501	239/17943	0.00601141	Lep/Adipoq/Hdac9/Cidea/Crhr2/Pparg/Edn1/Pde3b/Serpinb1a/Maob/Il33/Kcnb1/Zc3h12a/Gbp1/Inha/Irs1/Nos1	17
BP	GO:0019216	regulation of lipid metabolic process	22/501	354/17943	0.00610195	Lep/Cish/Thrsp/Adipoq/Cidea/Agt/Pparg/Dgat2/Egr1/Pde3b/Prox1/Tspo/Rarres2/Apod/Abcg1/Rorc/Sorbs1/Ptk2b/Irs1/Fgf2/Ppargc1a/Nr4a3	22
BP	GO:0010876	lipid localization	23/501	378/17943	0.00610716	Lep/Adipoq/Retn/Rbp4/Lipg/Cidea/Agt/Pparg/Apold1/Fzd4/Edn1/Pla2g2a/Dgat2/Gm2a/Nfkbia/Lpl/Tspo/Apod/Pla2g2d/Abcg1/Pltp/Zc3h12a/Pla2g2c	23
BP	GO:0045637	regulation of myeloid cell differentiation	16/501	218/17943	0.00619056	Lep/Adipoq/Fos/Tyrobp/Pf4/Lrrc17/Zfp36/Myc/Nfkbia/Ccr1/Jun/Klf10/Ptk2b/Mapk14/Rassf2/Zbtb16	16
BP	GO:0042471	ear morphogenesis	12/501	136/17943	0.00623094	Tshr/Prrx2/Edn1/Aldh1a3/Myc/Tbx1/Eya4/Eya1/Six2/Ush1c/Chd7/Nr4a3	12
BP	GO:1904062	regulation of cation transmembrane transport	22/501	355/17943	0.00623094	Slc36a2/Casq2/Trem2/Rrad/Fhl1/Ccl2/Agt/Adrb2/Alox5/Fxyd6/Sln/Pde4b/Cacna1a/Ptk2b/Atp1b2/Kcnc1/Cacng7/Dapk1/Pde4d/Nos1/Ppargc1a/Chd7	22
BP	GO:0030224	monocyte differentiation	6/501	36/17943	0.00623094	Fasn/Pparg/Myc/Jun/Pir/Vegfa	6
BP	GO:1903131	mononuclear cell differentiation	6/501	36/17943	0.00623094	Fasn/Pparg/Myc/Jun/Pir/Vegfa	6
BP	GO:1904707	positive regulation of vascular smooth muscle cell proliferation	6/501	36/17943	0.00623094	Agt/Igfbp5/Edn1/Jun/Fgf2/Nr4a3	6
BP	GO:0046888	negative regulation of hormone secretion	10/501	99/17943	0.00628255	Lep/Adipoq/Crhr2/Pparg/Edn1/Pde3b/Kcnb1/Inha/Irs1/Nos1	10
BP	GO:0071675	regulation of mononuclear cell migration	7/501	50/17943	0.00631019	Serpine1/Ccl2/Dusp1/Aif1/Ccr1/Rarres2/Mapk14	7
BP	GO:0051271	negative regulation of cellular component movement	21/501	332/17943	0.00631019	Adipoq/Angpt4/Serpine1/Ccl2/Sfrp2/Dusp1/Pparg/Dach1/Igfbp5/Aif1/Cyp1b1/Il33/Sema4a/Apod/Mcc/Sema7a/Srgap3/Adamts9/Fgf2/Nos1/Ppargc1a	21
BP	GO:0071453	cellular response to oxygen levels	16/501	219/17943	0.00633803	Pck1/S100b/Angpt4/Serpine1/Kcnk3/Adrb2/Pparg/Edn1/Egr1/Myc/Ankrd1/Ddah1/Ppp1r15a/Vegfa/Foxo1/Ppargc1a	16
BP	GO:0070997	neuron death	25/501	429/17943	0.00641519	Tp63/Sncg/Fos/Fzd9/Ccl2/Agt/Tyrobp/Egr1/C1qa/Ddit4/Jun/Kcnb1/Gpx1/Btg2/Max/Cacna1a/Gpi/Ptk2b/Tp53bp2/Vegfa/Ppp1r13b/Nos1/Ppargc1a/En1/Nr4a3	25
BP	GO:0060137	maternal process involved in parturition	4/501	14/17943	0.00669051	Ccl2/Cyp1a1/Edn1/Arntl	4
BP	GO:0034440	lipid oxidation	10/501	100/17943	0.00669051	Lep/Adipoq/Decr1/Pparg/Dgat2/Apod/Mapk14/Irs1/Ppargc1a/Nr4a3	10
BP	GO:0035904	aorta development	8/501	66/17943	0.00670794	Lep/Myh10/Robo2/Prox1/Tbx1/Eya1/Adamts9/Chd7	8
BP	GO:0002683	negative regulation of immune system process	27/501	481/17943	0.00681475	Adipoq/Ccl2/Vtcn1/Tyrobp/Dusp1/Pf4/Pparg/Lrrc17/Zfp36/Myc/Nfkbia/Ccr1/Il33/Fgl2/Apod/Cd68/Ptprc/Pla2g2d/Fcer1g/RT1-Ba/Gpx1/Tmem176a/Susd4/Ptk2b/Zc3h12a/Gbp1/Zbtb16	27
BP	GO:0046545	development of primary female sexual characteristics	13/501	158/17943	0.00689081	Lep/Retn/Pitx2/Serpine1/Agt/Zfpm2/Dach1/Fzd4/Robo2/Myc/Vegfa/Inha/Fanca	13
BP	GO:0046486	glycerolipid metabolic process	21/501	335/17943	0.00693515	Pck1/Cish/Thrsp/Scd/Ces1d/Pik3c2g/Lipg/Pla2g4e/Agpat2/Pla2g2a/Dgat2/Lpl/Pla2g15/Gpx1/Nudt4/Ddhd2/Ttc7a/Gpd1/Phka1/Fgf2/Lpin1	21
BP	GO:0010259	multicellular organism aging	7/501	51/17943	0.00694182	Lep/Tp63/Comp/Hdac9/Edn1/Cryab/Ctsl	7
BP	GO:0002053	positive regulation of mesenchymal cell proliferation	6/501	37/17943	0.006991	Tp63/Prrx2/Myc/Tbx1/Vegfa/Irs1	6
BP	GO:0008217	regulation of blood pressure	15/501	200/17943	0.006991	Lep/Adipoq/Myh6/Ier3/Agt/Crhr2/Adrb2/Pparg/Edn1/Cpa3/Ddah1/Smad3/Slc2a5/Pde4d/Nos1	15
BP	GO:0009126	purine nucleoside monophosphate metabolic process	19/501	289/17943	0.00703685	Myh6/Myh7/Trem2/Ier3/Ampd3/Myog/Myc/Prps2/Tspo/Ddit4/Myh3/Nudt4/LOC100362738/Gpi/Gpd1/Pkm/Nt5c1a/Slc25a25/Ppargc1a	19
BP	GO:0009135	purine nucleoside diphosphate metabolic process	10/501	101/17943	0.00703847	Ier3/Ampd3/Myog/Myc/Ddit4/LOC100362738/Gpi/Gpd1/Pkm/Ppargc1a	10
BP	GO:0009179	purine ribonucleoside diphosphate metabolic process	10/501	101/17943	0.00703847	Ier3/Ampd3/Myog/Myc/Ddit4/LOC100362738/Gpi/Gpd1/Pkm/Ppargc1a	10
BP	GO:0046620	regulation of organ growth	11/501	120/17943	0.00727263	Myh6/Rbp4/Agt/Zfpm2/Edn1/Cxadr/Pi16/Prox1/Mapk14/Pim1/Fgf2	11
BP	GO:1901214	regulation of neuron death	23/501	385/17943	0.00732167	Sncg/Fos/Fzd9/Ccl2/Agt/Tyrobp/Egr1/C1qa/Ddit4/Jun/Kcnb1/Gpx1/Btg2/Cacna1a/Gpi/Ptk2b/Tp53bp2/Vegfa/Ppp1r13b/Nos1/Ppargc1a/En1/Nr4a3	23
BP	GO:0006096	glycolytic process	9/501	84/17943	0.0073842	Ier3/Myog/Myc/Ddit4/LOC100362738/Gpi/Gpd1/Pkm/Ppargc1a	9
BP	GO:0007567	parturition	5/501	25/17943	0.00740441	Ccl2/Cyp1a1/Edn1/Fgl2/Arntl	5
BP	GO:0010874	regulation of cholesterol efflux	5/501	25/17943	0.00740441	Adipoq/Pparg/Nfkbia/Abcg1/Pltp	5
BP	GO:0022898	regulation of transmembrane transporter activity	18/501	268/17943	0.00742311	Casq2/Trem2/Rrad/Fhl1/Ccl2/Adrb2/Alox5/Fxyd6/Sln/Pde4b/Cacna1a/Ptk2b/Atp1b2/Kcnc1/Cacng7/Dapk1/Pde4d/Ppargc1a	18
BP	GO:0051048	negative regulation of secretion	18/501	268/17943	0.00742311	Lep/Adipoq/Hdac9/Cidea/Crhr2/Pparg/Edn1/Pde3b/Serpinb1a/Maob/Il33/Anpep/Kcnb1/Zc3h12a/Gbp1/Inha/Irs1/Nos1	18
BP	GO:0042326	negative regulation of phosphorylation	26/501	460/17943	0.00742311	Adipoq/Ier3/Prkar2b/Bmp7/Cdkn1a/Myog/Sfrp4/Sfrp2/Dusp1/Myc/Sh3rf2/Ddit4/Jun/Ppp1r15a/Ptprc/Gadd45g/Hspb1/Ptpn1/Dusp4/Zc3h12a/Gbp1/Foxo1/Rassf2/Pde4d/Nos1/Ppargc1a	26
BP	GO:0010594	regulation of endothelial cell migration	13/501	160/17943	0.00742311	Angpt4/Hdac9/Agt/Pparg/Prox1/Sema4a/Hspb1/Gpi/Ptk2b/Vegfa/Zc3h12a/Adamts9/Fgf2	13
BP	GO:0002548	monocyte chemotaxis	7/501	52/17943	0.0074864	Serpine1/Ccl2/Dusp1/Ccl6/Ccl24/Aif1/Ccr1	7
BP	GO:0055093	response to hyperoxia	7/501	52/17943	0.0074864	Serpine1/Cdkn1a/Pparg/Cyp1a1/Egr1/Alox5/Foxo1	7
BP	GO:0097327	response to antineoplastic agent	14/501	181/17943	0.00751356	Pck1/Fbxo32/Serpine1/Ccl2/Cebpa/Adrb2/Edn1/Egr1/Myc/Cyp1b1/Ddit4/Vegfa/Zc3h12a/Foxo1	14
BP	GO:0015804	neutral amino acid transport	6/501	38/17943	0.00773219	Slc7a10/Lep/Slc36a2/Slc1a5/Sfxn1/Slc38a3	6
BP	GO:0006757	ATP generation from ADP	9/501	85/17943	0.00781632	Ier3/Myog/Myc/Ddit4/LOC100362738/Gpi/Gpd1/Pkm/Ppargc1a	9
BP	GO:0006165	nucleoside diphosphate phosphorylation	10/501	103/17943	0.00788935	Pck1/Ier3/Myog/Myc/Ddit4/LOC100362738/Gpi/Gpd1/Pkm/Ppargc1a	10
BP	GO:0009132	nucleoside diphosphate metabolic process	11/501	122/17943	0.00802469	Pck1/Ier3/Ampd3/Myog/Myc/Ddit4/LOC100362738/Gpi/Gpd1/Pkm/Ppargc1a	11
BP	GO:0006937	regulation of muscle contraction	13/501	162/17943	0.00816815	Tnnc1/Tnnt1/Tnni1/Myh7/Atp2a2/Casq2/Myl3/Ncf1/Adrb2/Edn1/Pde4b/Zc3h12a/Pde4d	13
BP	GO:0030812	negative regulation of nucleotide catabolic process	4/501	15/17943	0.00821612	Ier3/Myog/Ddit4/Ppargc1a	4
BP	GO:0051198	negative regulation of coenzyme metabolic process	4/501	15/17943	0.00821612	Ier3/Myog/Ddit4/Ppargc1a	4
BP	GO:0032623	interleukin-2 production	8/501	69/17943	0.00833384	Vtcn1/Zfp36/Ptprc/Fcer1g/Ripk2/Pde4b/Gbp1/Pde4d	8
BP	GO:0045669	positive regulation of osteoblast differentiation	8/501	69/17943	0.00833384	Tp63/Bmp7/Cebpa/Sfrp2/Cebpd/Gdf10/Vegfa/Fgf2	8
BP	GO:0070252	actin-mediated cell contraction	9/501	86/17943	0.00833384	Tnnc1/Myh6/Myh7/Scn1a/Casq2/Actc1/Pde4b/Pde4d/Nos1	9
BP	GO:0009185	ribonucleoside diphosphate metabolic process	10/501	104/17943	0.00833384	Ier3/Ampd3/Myog/Myc/Ddit4/LOC100362738/Gpi/Gpd1/Pkm/Ppargc1a	10
BP	GO:0002792	negative regulation of peptide secretion	13/501	163/17943	0.0084612	Lep/Hdac9/Cidea/Crhr2/Pparg/Pde3b/Serpinb1a/Il33/Kcnb1/Zc3h12a/Gbp1/Irs1/Nos1	13
BP	GO:0014912	negative regulation of smooth muscle cell migration	5/501	26/17943	0.0084612	Adipoq/Serpine1/Igfbp5/Aif1/Ppargc1a	5
BP	GO:0048857	neural nucleus development	5/501	26/17943	0.0084612	Pitx2/Aldh1a3/Cacna1a/Kcnc1/Fgf2	5
BP	GO:0000266	mitochondrial fission	6/501	39/17943	0.00857299	Mx1/Mx2/Ddhd2/Myo19/Ppargc1a/Lpin1	6
BP	GO:0006958	complement activation, classical pathway	6/501	39/17943	0.00857299	C6/Cfi/C4a/C2/C1qa/Susd4	6
BP	GO:0001649	osteoblast differentiation	15/501	206/17943	0.00870942	Tp63/Fhl2/Smoc1/Bmp7/Cebpa/Sfrp2/Igfbp5/Cebpd/Gdf10/Smad3/Vegfa/Noct/Rassf2/Ostn/Fgf2	15
BP	GO:0046939	nucleotide phosphorylation	10/501	105/17943	0.00882156	Pck1/Ier3/Myog/Myc/Ddit4/LOC100362738/Gpi/Gpd1/Pkm/Ppargc1a	10
BP	GO:0043470	regulation of carbohydrate catabolic process	7/501	54/17943	0.00895326	Ier3/Myog/Myc/Ddit4/Gpd1/Ppp1r3c/Ppargc1a	7
BP	GO:0046330	positive regulation of JNK cascade	12/501	144/17943	0.00899467	Eda2r/Tpd52l1/Ncf1/Fzd4/Edn1/Sh3rf2/Ripk2/Gadd45g/Ptpn1/Ptk2b/Fgd4/Rassf2	12
BP	GO:0009123	nucleoside monophosphate metabolic process	20/501	321/17943	0.00907097	Myh6/Myh7/Trem2/Ier3/Ampd3/Myog/Myc/Prps2/Tspo/Ddit4/Myh3/Nudt4/Shmt1/LOC100362738/Gpi/Gpd1/Pkm/Nt5c1a/Slc25a25/Ppargc1a	20
BP	GO:2001236	regulation of extrinsic apoptotic signaling pathway	13/501	165/17943	0.00924224	Serpine1/Agt/Sfrp2/Pf4/Mal/Ret/Ptprc/Gpx1/Eya4/Eya1/Vegfa/Dapk1/G0s2	13
BP	GO:0001933	negative regulation of protein phosphorylation	24/501	419/17943	0.00924224	Adipoq/Prkar2b/Bmp7/Cdkn1a/Sfrp4/Sfrp2/Dusp1/Myc/Sh3rf2/Ddit4/Jun/Ppp1r15a/Ptprc/Gadd45g/Hspb1/Ptpn1/Dusp4/Zc3h12a/Gbp1/Foxo1/Rassf2/Pde4d/Nos1/Ppargc1a	24
BP	GO:0042060	wound healing	25/501	444/17943	0.00924224	Comp/Serpine1/Cdkn1a/Fzd9/Ccl2/Myog/Adrb2/Pf4/Myh10/Egr1/Gap43/F3/Apod/Fcer1g/Gpx1/Hbegf/Fntb/Mapk14/Pkm/Myf6/Smad3/Vegfa/Wfdc1/Rreb1/Fgf2	25
BP	GO:1904659	glucose transmembrane transport	11/501	125/17943	0.00931001	Lep/Adipoq/Edn1/Myc/Klf15/Sorbs1/Mapk14/Slc2a5/Irs1/Ostn/Nr4a3	11
BP	GO:0042866	pyruvate biosynthetic process	9/501	88/17943	0.00943309	Ier3/Myog/Myc/Ddit4/LOC100362738/Gpi/Gpd1/Pkm/Ppargc1a	9
BP	GO:0051149	positive regulation of muscle cell differentiation	9/501	88/17943	0.00943309	Csrp3/Myog/Edn1/Prox1/Cd53/Tbx1/Neu2/Mapk14/Myf6	9
BP	GO:0007548	sex differentiation	22/501	371/17943	0.00952751	Lep/Retn/Tp63/Rbp4/Pitx2/Mgst1/Serpine1/Agt/Sfrp2/Zfpm2/Dach1/Tlr5/Fzd4/Robo2/Myc/Cyp1b1/Tbx3/Ctsl/Vegfa/Inha/Fanca/Chd7	22
BP	GO:0050678	regulation of epithelial cell proliferation	22/501	371/17943	0.00952751	Lep/Tp63/Ccl2/Sfrp2/Pparg/Zfp36/F3/Myc/Ccl24/Prox1/Jun/Gpx1/Tbx1/Ctsl/Eya1/Mcc/Smad3/Vegfa/Wfdc1/Rreb1/Fgf2/Nr4a3	22
BP	GO:0046324	regulation of glucose import	8/501	71/17943	0.0095806	Lep/Adipoq/Myc/Klf15/Sorbs1/Mapk14/Irs1/Ostn	8
BP	GO:2001233	regulation of apoptotic signaling pathway	24/501	421/17943	0.00963828	Tp63/Tpd52l1/Ankrd2/Ier3/Zfp385a/Serpine1/Agt/Sfrp2/Pf4/Dapk2/Myc/Mal/Ret/Ptprc/Gpx1/Hspb1/Eya4/Ptpn1/Eya1/Mnt/Smad3/Vegfa/Dapk1/G0s2	24
BP	GO:0045663	positive regulation of myoblast differentiation	5/501	27/17943	0.00963828	Csrp3/Myog/Neu2/Mapk14/Myf6	5
BP	GO:0090025	regulation of monocyte chemotaxis	5/501	27/17943	0.00963828	Serpine1/Ccl2/Dusp1/Aif1/Ccr1	5
BP	GO:1903579	negative regulation of ATP metabolic process	5/501	27/17943	0.00963828	Ier3/Myog/Tspo/Ddit4/Ppargc1a	5
BP	GO:0008645	hexose transmembrane transport	11/501	126/17943	0.00970064	Lep/Adipoq/Edn1/Myc/Klf15/Sorbs1/Mapk14/Slc2a5/Irs1/Ostn/Nr4a3	11
BP	GO:0050728	negative regulation of inflammatory response	12/501	146/17943	0.00975669	Adipoq/Ier3/Slpi/Adrb2/Pparg/Acp5/Zfp36/Apod/Gpx1/Smad3/Zc3h12a/Wfdc1	12
BP	GO:0002460	adaptive immune response based on somatic recombination of immune receptors built from immunoglobulin superfamily domains	19/501	301/17943	0.0100343	C6/Cfi/C4b/C4a/Dpp4/C2/Myo1g/C1qa/Il33/Sema4a/Fgl2/Irf7/Ptprc/Fcer1g/Ripk2/Rorc/Susd4/Vegfa/Zc3h12a	19
BP	GO:0002685	regulation of leukocyte migration	15/501	210/17943	0.0100562	Trem2/Serpine1/Ccl2/Dusp1/Edn1/Dapk2/Ccl24/Aif1/Ccr1/Il33/Rarres2/Apod/Ptk2b/Mapk14/Vegfa	15
BP	GO:0032409	regulation of transporter activity	18/501	278/17943	0.0101345	Casq2/Trem2/Rrad/Fhl1/Ccl2/Adrb2/Alox5/Fxyd6/Sln/Pde4b/Cacna1a/Ptk2b/Atp1b2/Kcnc1/Cacng7/Dapk1/Pde4d/Ppargc1a	18
BP	GO:0002687	positive regulation of leukocyte migration	12/501	147/17943	0.0102342	Trem2/Serpine1/Ccl2/Edn1/Dapk2/Ccl24/Aif1/Ccr1/Rarres2/Ptk2b/Mapk14/Vegfa	12
BP	GO:0032570	response to progesterone	8/501	72/17943	0.0102342	Fosb/Fos/Ccl2/Adrb2/Cyp1b1/Tspo/Gpi/Vegfa	8
BP	GO:0055017	cardiac muscle tissue growth	10/501	108/17943	0.0103199	Myl2/Rbp4/Agt/Zfpm2/Edn1/Cxadr/Pi16/Mapk14/Pim1/Fgf2	10
BP	GO:1903426	regulation of reactive oxygen species biosynthetic process	10/501	108/17943	0.0103199	Agt/Tlr5/Acp5/Aif1/Tspo/Ddah1/Klf2/Ptk2b/Smad3/Zc3h12a	10
BP	GO:0002455	humoral immune response mediated by circulating immunoglobulin	7/501	56/17943	0.0104469	C6/Cfi/C4a/C2/C1qa/Ptprc/Susd4	7
BP	GO:0042743	hydrogen peroxide metabolic process	7/501	56/17943	0.0104469	Ncf1/Cyp1a1/Hba-a1/Hba-a2/Gpx3/Hbb/Gpx1	7
BP	GO:0045923	positive regulation of fatty acid metabolic process	6/501	41/17943	0.0104469	Adipoq/Agt/Pparg/Irs1/Ppargc1a/Nr4a3	6
BP	GO:0050890	cognition	21/501	351/17943	0.0106149	S100b/Fos/Zfp385a/Prkar2b/Bche/Fzd9/Agt/Cebpa/Adrb2/Egr1/Egr2/Gm2a/RT1-Da/Jun/Btg2/Ddhd2/Gpi/Shc3/Pde4d/En1/Chd7	21
BP	GO:0046328	regulation of JNK cascade	14/501	190/17943	0.0106149	Eda2r/Tpd52l1/Ncf1/Sfrp4/Sfrp2/Fzd4/Edn1/Sh3rf2/Ripk2/Gadd45g/Ptpn1/Ptk2b/Fgd4/Rassf2	14
BP	GO:0015749	monosaccharide transmembrane transport	11/501	128/17943	0.0106149	Lep/Adipoq/Edn1/Myc/Klf15/Sorbs1/Mapk14/Slc2a5/Irs1/Ostn/Nr4a3	11
BP	GO:1903825	organic acid transmembrane transport	11/501	128/17943	0.0106149	Slc7a10/Rbp4/Slc36a2/Slc1a3/Slc7a15/Agt/Slc1a5/Myc/Folr2/Slc38a3/Slc16a3	11
BP	GO:1905039	carboxylic acid transmembrane transport	11/501	128/17943	0.0106149	Slc7a10/Rbp4/Slc36a2/Slc1a3/Slc7a15/Agt/Slc1a5/Myc/Folr2/Slc38a3/Slc16a3	11
BP	GO:0019439	aromatic compound catabolic process	26/501	476/17943	0.0106149	Ier3/Ampd3/Myog/Cidea/Dnase1l3/Cyp1a1/Zfp36/Myc/Ephx1/Ddit4/Blvrb/Nudt4/Btg2/Pde4b/LOC100362738/Gpi/Gpd1/Pkm/Ago2/Vegfa/Zc3h12a/Nt5c1a/Cacng7/Noct/Pde4d/Ppargc1a	26
BP	GO:0007623	circadian rhythm	17/501	257/17943	0.0106807	Lep/Adipoq/Pparg/Egr1/Kcna2/Prox1/Jun/Rorc/Dbp/Klf10/Gpr157/Nfil3/Opn4/Arntl/Noct/Crem/Ppargc1a	17
BP	GO:0030316	osteoclast differentiation	10/501	109/17943	0.0107922	Trem2/Fos/Tyrobp/Lrrc17/Acp5/Ccr1/Fcer1g/Klf10/Mapk14/Rassf2	10
BP	GO:0010611	regulation of cardiac muscle hypertrophy	8/501	73/17943	0.0107922	Lmcd1/Fbxo32/Agt/Edn1/Pi16/Smad3/Foxo1/Nr4a3	8
BP	GO:0032370	positive regulation of lipid transport	8/501	73/17943	0.0107922	Adipoq/Retn/Lipg/Pparg/Edn1/Nfkbia/Abcg1/Pltp	8
BP	GO:0070098	chemokine-mediated signaling pathway	8/501	73/17943	0.0107922	Trem2/Ccl2/Pf4/Ccl6/Cxcr5/Ccl24/Ccr1/Ptk2b	8
BP	GO:0030336	negative regulation of cell migration	18/501	281/17943	0.0109434	Adipoq/Angpt4/Serpine1/Ccl2/Sfrp2/Dusp1/Pparg/Dach1/Igfbp5/Aif1/Cyp1b1/Il33/Apod/Mcc/Srgap3/Adamts9/Fgf2/Ppargc1a	18
BP	GO:0048864	stem cell development	9/501	91/17943	0.0110969	Pitx2/Bmp7/Edn1/Sema4a/Ret/Ptprc/Tbx1/Sema7a/Fgf2	9
BP	GO:0090596	sensory organ morphogenesis	19/501	305/17943	0.0110969	Rbp4/Pitx2/Tshr/Bmp7/Prrx2/Edn1/Aldh1a3/Myc/Prox1/Arl6/Tbx1/Eya4/Eya1/Vegfa/Six2/Fgf2/Ush1c/Chd7/Nr4a3	19
BP	GO:0001657	ureteric bud development	10/501	110/17943	0.0113926	Bmp7/Agt/Robo2/Myc/Ret/Eya1/Smad3/Vegfa/Six2/Fgf2	10
BP	GO:0006110	regulation of glycolytic process	6/501	42/17943	0.0114576	Ier3/Myog/Myc/Ddit4/Gpd1/Ppargc1a	6
BP	GO:0032526	response to retinoic acid	12/501	150/17943	0.0115853	Pck1/Lep/Rbp4/Ccl2/Myog/Dusp1/Pparg/Myc/Ret/Tbx1/Rxrg/Ptk2b	12
BP	GO:0015807	L-amino acid transport	8/501	74/17943	0.0116174	Slc7a10/Slc36a2/Slc1a3/Slc7a15/Agt/Slc1a5/Sfxn1/Slc38a3	8
BP	GO:0051402	neuron apoptotic process	19/501	307/17943	0.0117164	Tp63/Fzd9/Ccl2/Agt/Tyrobp/Egr1/Jun/Kcnb1/Gpx1/Btg2/Max/Cacna1a/Gpi/Ptk2b/Vegfa/Nos1/Ppargc1a/En1/Nr4a3	19
BP	GO:0071219	cellular response to molecule of bacterial origin	19/501	307/17943	0.0117164	Trem2/Cd6/Serpine1/Ccl2/Pf4/Tlr5/Zfp36/Nfkbia/Tspo/Ankrd1/Jun/Cd68/Ripk2/Pde4b/Irak2/Mapk14/Zc3h12a/Pde4d/Ppargc1a	19
BP	GO:0002431	Fc receptor mediated stimulatory signaling pathway	4/501	17/17943	0.0117164	Myo1g/Ptprc/Fcer1g/Nr4a3	4
BP	GO:0090192	regulation of glomerulus development	4/501	17/17943	0.0117164	Adipoq/Bmp7/Egr1/Ret	4
BP	GO:2001170	negative regulation of ATP biosynthetic process	4/501	17/17943	0.0117164	Ier3/Myog/Ddit4/Ppargc1a	4
BP	GO:0030279	negative regulation of ossification	9/501	92/17943	0.0117164	Adrb2/Igfbp5/Gdf10/Ccr1/Kremen1/Ptk2b/Smad3/Noct/Ostn	9
BP	GO:0072163	mesonephric epithelium development	10/501	111/17943	0.0119073	Bmp7/Agt/Robo2/Myc/Ret/Eya1/Smad3/Vegfa/Six2/Fgf2	10
BP	GO:0072164	mesonephric tubule development	10/501	111/17943	0.0119073	Bmp7/Agt/Robo2/Myc/Ret/Eya1/Smad3/Vegfa/Six2/Fgf2	10
BP	GO:0071248	cellular response to metal ion	16/501	238/17943	0.0120112	Fosb/Fos/Gsta4/Ncf1/Serpine1/Kcnk3/Myog/Cebpa/Pparg/Cyp1a1/Edn1/Alox5ap/Tspo/Jun/Mt2A/Ppargc1a	16
BP	GO:0071456	cellular response to hypoxia	13/501	172/17943	0.0120112	Pck1/S100b/Angpt4/Serpine1/Kcnk3/Adrb2/Edn1/Egr1/Myc/Ankrd1/Ddah1/Vegfa/Ppargc1a	13
BP	GO:0043583	ear development	17/501	261/17943	0.0120173	Tshr/Kcnk3/Cebpa/Prrx2/Edn1/Cebpd/Aldh1a3/Myc/Prox1/Tbx1/Eya4/Eya1/Maf/Six2/Ush1c/Chd7/Nr4a3	17
BP	GO:0048662	negative regulation of smooth muscle cell proliferation	7/501	58/17943	0.0120235	Adipoq/Cdkn1a/Pparg/Igfbp5/Aif1/Apod/Ppargc1a	7
BP	GO:0031348	negative regulation of defense response	15/501	216/17943	0.0121115	Adipoq/Ier3/Slpi/Adrb2/Pparg/Acp5/Zfp36/Ccr1/Fgl2/Apod/Gpx1/Susd4/Smad3/Zc3h12a/Wfdc1	15
BP	GO:0042744	hydrogen peroxide catabolic process	5/501	29/17943	0.0121115	Hba-a1/Hba-a2/Gpx3/Hbb/Gpx1	5
BP	GO:0043951	negative regulation of cAMP-mediated signaling	5/501	29/17943	0.0121115	Arrdc3/Crhr2/Pde3b/Pde4b/Pde4d	5
BP	GO:0048643	positive regulation of skeletal muscle tissue development	5/501	29/17943	0.0121115	Myog/Adrb2/Tbx1/Myf6/Arntl	5
BP	GO:1900543	negative regulation of purine nucleotide metabolic process	5/501	29/17943	0.0121115	Ier3/Myog/Tspo/Ddit4/Ppargc1a	5
BP	GO:0046626	regulation of insulin receptor signaling pathway	8/501	75/17943	0.0121801	Lep/Cish/Agt/Rarres2/Sorbs1/Ptpn1/Irs1/Mzb1	8
BP	GO:0034765	regulation of ion transmembrane transport	26/501	483/17943	0.0121801	Slc36a2/Scn1a/Casq2/Trem2/Rrad/Fhl1/Ccl2/Agt/Adrb2/Kcna2/Alox5/Fxyd6/Kcnb1/Sln/Pde4b/Cacna1a/Ptk2b/Atp1b2/Kcnj12/Kcnc1/Cacng7/Dapk1/Pde4d/Nos1/Ppargc1a/Chd7	26
BP	GO:0001774	microglial cell activation	6/501	43/17943	0.0122525	Trem2/Tyrobp/Pparg/C1qa/Il33/Jun	6
BP	GO:0002269	leukocyte activation involved in inflammatory response	6/501	43/17943	0.0122525	Trem2/Tyrobp/Pparg/C1qa/Il33/Jun	6
BP	GO:0003156	regulation of animal organ formation	6/501	43/17943	0.0122525	Bmp7/Robo2/Tbx1/Eya1/Pim1/Fgf2	6
BP	GO:0030811	regulation of nucleotide catabolic process	6/501	43/17943	0.0122525	Ier3/Myog/Myc/Ddit4/Gpd1/Ppargc1a	6
BP	GO:1900744	regulation of p38MAPK cascade	6/501	43/17943	0.0122525	Lep/Ncf1/Dusp1/Gadd45g/Vegfa/Zc3h12a	6
BP	GO:0008585	female gonad development	12/501	152/17943	0.0122525	Lep/Retn/Pitx2/Serpine1/Agt/Zfpm2/Fzd4/Robo2/Myc/Vegfa/Inha/Fanca	12
BP	GO:0034219	carbohydrate transmembrane transport	11/501	132/17943	0.0125121	Lep/Adipoq/Edn1/Myc/Klf15/Sorbs1/Mapk14/Slc2a5/Irs1/Ostn/Nr4a3	11
BP	GO:0036296	response to increased oxygen levels	7/501	59/17943	0.0128243	Serpine1/Cdkn1a/Pparg/Cyp1a1/Egr1/Alox5/Foxo1	7
BP	GO:0046622	positive regulation of organ growth	7/501	59/17943	0.0128243	Agt/Zfpm2/Edn1/Prox1/Mapk14/Pim1/Fgf2	7
BP	GO:1902475	L-alpha-amino acid transmembrane transport	7/501	59/17943	0.0128243	Slc7a10/Slc36a2/Slc1a3/Slc7a15/Agt/Slc1a5/Slc38a3	7
BP	GO:0035265	organ growth	15/501	218/17943	0.012856	Lep/Myh6/Myl2/Rbp4/Comp/Agt/Zfpm2/Edn1/Cxadr/Pi16/Prox1/Mapk14/Pim1/Ostn/Fgf2	15
BP	GO:0034284	response to monosaccharide	19/501	311/17943	0.012856	Pck1/Lep/Adipoq/Nnat/Cma1/Serpine1/Ccl2/Crhr2/Acp5/Egr1/Pde3b/Aqp4/Kcnb1/Gpx1/Ctsl/Ptk2b/Mapk14/Slc2a5/Ppargc1a	19
BP	GO:0030808	regulation of nucleotide biosynthetic process	8/501	76/17943	0.012856	Trem2/Ier3/Myog/Myc/Ddit4/Gpd1/Nos1/Ppargc1a	8
BP	GO:1900371	regulation of purine nucleotide biosynthetic process	8/501	76/17943	0.012856	Trem2/Ier3/Myog/Myc/Ddit4/Gpd1/Nos1/Ppargc1a	8
BP	GO:0009167	purine ribonucleoside monophosphate metabolic process	18/501	288/17943	0.0132043	Myh6/Myh7/Trem2/Ier3/Ampd3/Myog/Myc/Prps2/Tspo/Ddit4/Myh3/Nudt4/LOC100362738/Gpi/Gpd1/Pkm/Slc25a25/Ppargc1a	18
BP	GO:2001257	regulation of cation channel activity	13/501	175/17943	0.0133036	Casq2/Trem2/Rrad/Ccl2/Adrb2/Pde4b/Cacna1a/Ptk2b/Kcnc1/Cacng7/Dapk1/Pde4d/Ppargc1a	13
BP	GO:0008643	carbohydrate transport	12/501	154/17943	0.0133914	Lep/Adipoq/Aqp7/Edn1/Myc/Klf15/Sorbs1/Mapk14/Slc2a5/Irs1/Ostn/Nr4a3	12
BP	GO:0045980	negative regulation of nucleotide metabolic process	5/501	30/17943	0.0135351	Ier3/Myog/Tspo/Ddit4/Ppargc1a	5
BP	GO:0071880	adenylate cyclase-activating adrenergic receptor signaling pathway	5/501	30/17943	0.0135351	Arrdc3/Adrb2/Pde4b/Pde4d/Nos1	5
BP	GO:1900745	positive regulation of p38MAPK cascade	5/501	30/17943	0.0135351	Lep/Ncf1/Gadd45g/Vegfa/Zc3h12a	5
BP	GO:0007512	adult heart development	4/501	18/17943	0.0136037	Myh6/Myh7/Myh10/Chd7	4
BP	GO:0010869	regulation of receptor biosynthetic process	4/501	18/17943	0.0136037	Adipoq/Pparg/Edn1/Sec24a	4
BP	GO:0010888	negative regulation of lipid storage	4/501	18/17943	0.0136037	Lep/Pparg/Nfkbia/Abcg1	4
BP	GO:0048332	mesoderm morphogenesis	8/501	77/17943	0.0136382	Bmp7/Sfrp2/Tbx3/Eya1/Gpi/Smad3/Six2/Nr4a3	8
BP	GO:0071320	cellular response to cAMP	8/501	77/17943	0.0136382	Pck1/Adipoq/Serpine1/Igfbp5/Egr1/Cyp1b1/Gpd1/Pde4d	8
BP	GO:0032663	regulation of interleukin-2 production	7/501	60/17943	0.0136382	Vtcn1/Zfp36/Ptprc/Ripk2/Pde4b/Gbp1/Pde4d	7
BP	GO:0048641	regulation of skeletal muscle tissue development	7/501	60/17943	0.0136382	S100b/Hdac9/Myog/Adrb2/Tbx1/Myf6/Arntl	7
BP	GO:0097006	regulation of plasma lipoprotein particle levels	7/501	60/17943	0.0136382	Adipoq/Ces1d/Lipg/Dgat2/Lpl/Abcg1/Pltp	7
BP	GO:0007611	learning or memory	19/501	314/17943	0.013881	S100b/Fos/Zfp385a/Prkar2b/Bche/Fzd9/Agt/Cebpa/Adrb2/Egr1/Egr2/Gm2a/Jun/Btg2/Ddhd2/Gpi/Shc3/Pde4d/En1	19
BP	GO:0046700	heterocycle catabolic process	25/501	464/17943	0.0139009	Ier3/Ampd3/Myog/Cidea/Dnase1l3/Cyp1a1/Zfp36/Myc/Ddit4/Blvrb/Nudt4/Btg2/Pde4b/LOC100362738/Gpi/Gpd1/Pkm/Ago2/Vegfa/Zc3h12a/Nt5c1a/Cacng7/Noct/Pde4d/Ppargc1a	25
BP	GO:0034655	nucleobase-containing compound catabolic process	23/501	413/17943	0.0139009	Ier3/Ampd3/Myog/Cidea/Dnase1l3/Zfp36/Myc/Ddit4/Nudt4/Btg2/Pde4b/LOC100362738/Gpi/Gpd1/Pkm/Ago2/Vegfa/Zc3h12a/Nt5c1a/Cacng7/Noct/Pde4d/Ppargc1a	23
BP	GO:0019935	cyclic-nucleotide-mediated signaling	15/501	221/17943	0.0141084	Lep/Tshr/Ramp1/Arrdc3/Prkar2b/Crhr2/Adrb2/Pf4/Pde3b/Adgre1/Pde4b/Ptk2b/Crem/Pde4d/Nos1	15
BP	GO:0007565	female pregnancy	18/501	291/17943	0.0142701	Lep/Fosb/Fos/Endou/Serpine1/Ccl2/Agt/Sfrp4/Adrb2/Igfbp5/Alas2/Aqp4/Ctsl/Hspb1/Ago2/Vegfa/Slc38a3/Nos1	18
BP	GO:0036294	cellular response to decreased oxygen levels	14/501	199/17943	0.0142873	Pck1/S100b/Angpt4/Serpine1/Kcnk3/Adrb2/Edn1/Egr1/Myc/Ankrd1/Ddah1/Ppp1r15a/Vegfa/Ppargc1a	14
BP	GO:0010226	response to lithium ion	6/501	45/17943	0.014601	Gsta4/Myog/Cebpa/Gria2/Pparg/Ptk2b	6
BP	GO:0010464	regulation of mesenchymal cell proliferation	6/501	45/17943	0.014601	Tp63/Prrx2/Myc/Tbx1/Vegfa/Irs1	6
BP	GO:0042594	response to starvation	15/501	222/17943	0.014601	Pck1/Serpine1/Cdkn1a/Pparg/Zfp36/Jun/Ppp1r15a/Ctsl/Max/Sorbs1/Klf10/Zc3h12a/Slc38a3/Foxo1/Ppargc1a	15
BP	GO:2001169	regulation of ATP biosynthetic process	7/501	61/17943	0.0147324	Trem2/Ier3/Myog/Myc/Ddit4/Gpd1/Ppargc1a	7
BP	GO:0050673	epithelial cell proliferation	24/501	441/17943	0.0147963	Lep/Tp63/Ccl2/Sfrp2/Pparg/Igfbp5/Zfp36/F3/Myc/Ccl24/Prox1/Serpinb1a/Jun/Gpx1/Tbx1/Ctsl/Eya1/Mcc/Smad3/Vegfa/Wfdc1/Rreb1/Fgf2/Nr4a3	24
BP	GO:0030308	negative regulation of cell growth	14/501	200/17943	0.0147963	Myl2/Rrad/Fhl1/Cdkn1a/Agt/Sfrp2/Pparg/Cgref1/Pi16/Cryab/Sema4a/Smad3/Sema7a/Ostn	14
BP	GO:1990266	neutrophil migration	10/501	116/17943	0.0148845	Ccl2/Pf4/Edn1/Ccl6/Dapk2/Cxadr/Ccl24/Fcer1g/Pde4b/Pde4d	10
BP	GO:0072073	kidney epithelium development	12/501	157/17943	0.0149905	Adipoq/Bmp7/Agt/Robo2/Myc/Ret/Klf15/Eya1/Smad3/Vegfa/Six2/Fgf2	12
BP	GO:1901654	response to ketone	22/501	391/17943	0.0150014	Pck1/Fosb/Fos/Fbxo32/Serpine1/Cdkn1a/Ccl2/Cebpa/Dusp1/Adrb2/Pparg/Edn1/Myc/Cyp1b1/Tspo/Maob/Ddit4/Klf2/Gpx3/Gpi/Vegfa/Foxo1	22
BP	GO:0001562	response to protozoan	5/501	31/17943	0.0150014	Ier3/Vtcn1/Gbp4/Pf4/Gbp1	5
BP	GO:0045445	myoblast differentiation	9/501	97/17943	0.0150451	Ankrd2/Csrp3/Myog/Tbx3/Neu2/Mapk14/Asb2/Myf6/Nmrk2	9
BP	GO:0043524	negative regulation of neuron apoptotic process	13/501	179/17943	0.0153212	Fzd9/Ccl2/Agt/Jun/Btg2/Cacna1a/Gpi/Ptk2b/Vegfa/Nos1/Ppargc1a/En1/Nr4a3	13
BP	GO:0055021	regulation of cardiac muscle tissue growth	8/501	79/17943	0.015437	Rbp4/Zfpm2/Edn1/Cxadr/Pi16/Mapk14/Pim1/Fgf2	8
BP	GO:0045137	development of primary sexual characteristics	19/501	318/17943	0.0154403	Lep/Retn/Rbp4/Pitx2/Mgst1/Serpine1/Agt/Sfrp2/Zfpm2/Dach1/Tlr5/Fzd4/Robo2/Myc/Cyp1b1/Ctsl/Vegfa/Inha/Fanca	19
BP	GO:0016064	immunoglobulin mediated immune response	11/501	137/17943	0.0154741	C6/Cfi/C4b/C4a/C2/C1qa/Fgl2/Irf7/Ptprc/Fcer1g/Susd4	11
BP	GO:0048678	response to axon injury	10/501	117/17943	0.015592	Tyrobp/Gap43/Aif1/Tspo/Apod/Jun/Kremen1/Max/Map1b/Fgf2	10
BP	GO:1903428	positive regulation of reactive oxygen species biosynthetic process	7/501	62/17943	0.0157421	Agt/Tlr5/Aif1/Ddah1/Klf2/Ptk2b/Smad3	7
BP	GO:0009629	response to gravity	4/501	19/17943	0.0157421	Fos/Serpine1/Myog/Pkm	4
BP	GO:0030809	negative regulation of nucleotide biosynthetic process	4/501	19/17943	0.0157421	Ier3/Myog/Ddit4/Ppargc1a	4
BP	GO:0046321	positive regulation of fatty acid oxidation	4/501	19/17943	0.0157421	Pparg/Irs1/Ppargc1a/Nr4a3	4
BP	GO:1900372	negative regulation of purine nucleotide biosynthetic process	4/501	19/17943	0.0157421	Ier3/Myog/Ddit4/Ppargc1a	4
BP	GO:0048562	embryonic organ morphogenesis	19/501	319/17943	0.0157421	Rbp4/Pitx2/Tshr/Bmp7/Prrx2/Edn1/Aldh1a3/Myc/Prox1/Tbx3/Tbx1/Eya4/Eya1/Smad3/Six2/Mical2/Ush1c/Chd7/Nr4a3	19
BP	GO:0090184	positive regulation of kidney development	6/501	46/17943	0.0157421	Adipoq/Agt/Egr1/Myc/Ret/Vegfa	6
BP	GO:0019395	fatty acid oxidation	9/501	98/17943	0.0157506	Lep/Adipoq/Decr1/Pparg/Dgat2/Mapk14/Irs1/Ppargc1a/Nr4a3	9
BP	GO:0009127	purine nucleoside monophosphate biosynthetic process	12/501	159/17943	0.0161006	Trem2/Ier3/Ampd3/Myog/Myc/Prps2/Ddit4/LOC100362738/Gpi/Gpd1/Pkm/Ppargc1a	12
BP	GO:0009168	purine ribonucleoside monophosphate biosynthetic process	12/501	159/17943	0.0161006	Trem2/Ier3/Ampd3/Myog/Myc/Prps2/Ddit4/LOC100362738/Gpi/Gpd1/Pkm/Ppargc1a	12
BP	GO:0006575	cellular modified amino acid metabolic process	13/501	181/17943	0.0163582	Mgst1/Gsta4/Gstt1/Hpgds/Gstt3/Gstt2/Gstm5/Gpx3/Hbb/Gpx1/Carns1/Shmt1/Slco4a1	13
BP	GO:0009124	nucleoside monophosphate biosynthetic process	13/501	181/17943	0.0163582	Trem2/Ier3/Ampd3/Myog/Myc/Prps2/Ddit4/Shmt1/LOC100362738/Gpi/Gpd1/Pkm/Ppargc1a	13
BP	GO:0071897	DNA biosynthetic process	13/501	181/17943	0.0163582	Adipoq/Cdkn1a/Crhr2/Dusp1/Pparg/Dach1/Myc/Cyp1b1/Ankrd1/Pola2/Ptk2b/Vegfa/Fgf2	13
BP	GO:0071900	regulation of protein serine/threonine kinase activity	25/501	472/17943	0.0164128	Adipoq/Tpd52l1/Prkar2b/Bmp7/Cdkn1a/Agt/Sfrp2/Dusp1/Adrb2/Fzd4/Edn1/Prox1/Ret/Ptprc/Ripk2/Gadd45g/Hspb1/Ptpn1/Dusp4/Ptk2b/Vegfa/Fgd4/Pim1/Fgf2/Nek10	25
BP	GO:0071875	adrenergic receptor signaling pathway	5/501	32/17943	0.0166409	Arrdc3/Adrb2/Pde4b/Pde4d/Nos1	5
BP	GO:0006641	triglyceride metabolic process	9/501	99/17943	0.0166409	Pck1/Thrsp/Scd/Lipg/Dgat2/Lpl/Gpx1/Ddhd2/Lpin1	9
BP	GO:0043523	regulation of neuron apoptotic process	17/501	273/17943	0.0166409	Fzd9/Ccl2/Agt/Tyrobp/Egr1/Jun/Kcnb1/Gpx1/Btg2/Cacna1a/Gpi/Ptk2b/Vegfa/Nos1/Ppargc1a/En1/Nr4a3	17
BP	GO:2000146	negative regulation of cell motility	18/501	297/17943	0.0166681	Adipoq/Angpt4/Serpine1/Ccl2/Sfrp2/Dusp1/Pparg/Dach1/Igfbp5/Aif1/Cyp1b1/Il33/Apod/Mcc/Srgap3/Adamts9/Fgf2/Ppargc1a	18
BP	GO:0019724	B cell mediated immunity	11/501	139/17943	0.0167025	C6/Cfi/C4b/C4a/C2/C1qa/Fgl2/Irf7/Ptprc/Fcer1g/Susd4	11
BP	GO:0032873	negative regulation of stress-activated MAPK cascade	6/501	47/17943	0.0171181	Sfrp4/Sfrp2/Dusp1/Myc/Sh3rf2/Foxo1	6
BP	GO:0060421	positive regulation of heart growth	6/501	47/17943	0.0171181	Zfpm2/Edn1/Prox1/Mapk14/Pim1/Fgf2	6
BP	GO:0070303	negative regulation of stress-activated protein kinase signaling cascade	6/501	47/17943	0.0171181	Sfrp4/Sfrp2/Dusp1/Myc/Sh3rf2/Foxo1	6
BP	GO:0071222	cellular response to lipopolysaccharide	18/501	298/17943	0.0171277	Cd6/Serpine1/Ccl2/Pf4/Tlr5/Zfp36/Nfkbia/Tspo/Ankrd1/Jun/Cd68/Ripk2/Pde4b/Irak2/Mapk14/Zc3h12a/Pde4d/Ppargc1a	18
BP	GO:0046323	glucose import	8/501	81/17943	0.0171939	Lep/Adipoq/Myc/Klf15/Sorbs1/Mapk14/Irs1/Ostn	8
BP	GO:0007254	JNK cascade	14/501	205/17943	0.0174009	Eda2r/Tpd52l1/Ncf1/Sfrp4/Sfrp2/Fzd4/Edn1/Sh3rf2/Ripk2/Gadd45g/Ptpn1/Ptk2b/Fgd4/Rassf2	14
BP	GO:0097191	extrinsic apoptotic signaling pathway	15/501	228/17943	0.017552	Serpine1/Agt/Sfrp2/Pf4/Mal/Il33/Ret/Ptprc/Gpx1/Eya4/Eya1/Smad3/Vegfa/Dapk1/G0s2	15
BP	GO:0045785	positive regulation of cell adhesion	23/501	424/17943	0.0177929	Lep/Smoc1/Bmp7/Cd6/Ccl2/Vtcn1/Sfrp2/Dpp4/Ccdc80/Aif1/Ret/Ptprc/Ripk2/RT1-Ba/Zmiz1/Adam19/Ptk2b/Smad3/Vegfa/Rreb1/Zbtb16/Pde4d/Nr4a3	23
BP	GO:0060986	endocrine hormone secretion	7/501	64/17943	0.0180029	Lep/Retn/Agt/Crhr2/Fzd4/Tbx3/Inha	7
BP	GO:0045862	positive regulation of proteolysis	20/501	349/17943	0.0180029	Trem2/C6/Sfrp2/Zfand2a/Pparg/F3/Myc/Sh3rf2/Rnf144b/Il33/Clec3b/Ret/Ripk2/Spon1/Ptk2b/Mapk14/Smad3/Zc3h12a/Rnf139/Dapk1	20
BP	GO:0009161	ribonucleoside monophosphate metabolic process	18/501	300/17943	0.0180029	Myh6/Myh7/Trem2/Ier3/Ampd3/Myog/Myc/Prps2/Tspo/Ddit4/Myh3/Nudt4/LOC100362738/Gpi/Gpd1/Pkm/Slc25a25/Ppargc1a	18
BP	GO:0006691	leukotriene metabolic process	4/501	20/17943	0.0180029	Ncf1/Alox5ap/Alox5/Cyp4f18	4
BP	GO:0018904	ether metabolic process	4/501	20/17943	0.0180029	Fasn/Agmo/Tmem86a/Ephx1	4
BP	GO:0030540	female genitalia development	4/501	20/17943	0.0180029	Tp63/Rbp4/Tbx3/Chd7	4
BP	GO:0032274	gonadotropin secretion	4/501	20/17943	0.0180029	Lep/Crhr2/Tbx3/Inha	4
BP	GO:0032691	negative regulation of interleukin-1 beta production	4/501	20/17943	0.0180029	Acp5/Serpinb1a/Aqp4/Zc3h12a	4
BP	GO:0048143	astrocyte activation	4/501	20/17943	0.0180029	Trem2/Agt/C1qa/Mt2A	4
BP	GO:0048245	eosinophil chemotaxis	4/501	20/17943	0.0180029	Ccl2/Ccl6/Dapk2/Ccl24	4
BP	GO:0055012	ventricular cardiac muscle cell differentiation	4/501	20/17943	0.0180029	Pitx2/Fhl2/Myh10/Prox1	4
BP	GO:0061323	cell proliferation involved in heart morphogenesis	4/501	20/17943	0.0180029	Pitx2/Tbx1/Eya1/Pim1	4
BP	GO:0070293	renal absorption	4/501	20/17943	0.0180029	Adipoq/Aqp7/Aqp4/Hbb	4
BP	GO:0090026	positive regulation of monocyte chemotaxis	4/501	20/17943	0.0180029	Serpine1/Ccl2/Aif1/Ccr1	4
BP	GO:0002696	positive regulation of leukocyte activation	19/501	325/17943	0.0181577	Lep/Trem2/Cd6/Cdkn1a/Ccl2/Cebpa/Vtcn1/Tyrobp/Dpp4/C1qa/Aif1/Il33/Ptprc/Fcer1g/Ripk2/RT1-Ba/Zmiz1/Zbtb16/Nr4a3	19
BP	GO:0002021	response to dietary excess	5/501	33/17943	0.0181665	Lep/Adrb2/Pparg/Slc25a25/Ppargc1a	5
BP	GO:0071827	plasma lipoprotein particle organization	5/501	33/17943	0.0181665	Ces1d/Lipg/Lpl/Abcg1/Pltp	5
BP	GO:0035902	response to immobilization stress	6/501	48/17943	0.0182657	Fos/Pparg/Cyp1a1/Ppp1r15a/Gpi/Ptk2b	6
BP	GO:1903115	regulation of actin filament-based movement	6/501	48/17943	0.0182657	Tnnc1/Atp2a2/Casq2/Pde4b/Pde4d/Nos1	6
BP	GO:0048771	tissue remodeling	14/501	207/17943	0.018272	Lep/Rspo3/Csrp3/Tnfrsf11b/Agt/Sfrp4/Adrb2/Igfbp5/Acp5/Tbx1/Ptk2b/Vegfa/Rassf2/Chd7	14
BP	GO:0007015	actin filament organization	22/501	401/17943	0.0184847	Myom3/Tpm3/LOC100909784/Actr3b/Crhr2/Myh10/Cdc42ep2/Ccl24/Actc1/Rnd1/Prox1/Aif1/Lcp1/Sorbs3/Sorbs1/Ptk2b/Mybpc2/Myom2/Smad3/Arhgap28/Mical2/Ush1c	22
BP	GO:0000768	syncytium formation by plasma membrane fusion	7/501	65/17943	0.0189478	Pitx2/Trem2/Myog/Tyrobp/Cd53/Mapk14/Myf6	7
BP	GO:0140253	cell-cell fusion	7/501	65/17943	0.0189478	Pitx2/Trem2/Myog/Tyrobp/Cd53/Mapk14/Myf6	7
BP	GO:0006639	acylglycerol metabolic process	10/501	122/17943	0.0192684	Pck1/Thrsp/Scd/Ces1d/Lipg/Dgat2/Lpl/Gpx1/Ddhd2/Lpin1	10
BP	GO:0032328	alanine transport	3/501	10/17943	0.0192684	Slc7a10/Slc36a2/Slc38a3	3
BP	GO:0046880	regulation of follicle-stimulating hormone secretion	3/501	10/17943	0.0192684	Lep/Crhr2/Inha	3
BP	GO:0071447	cellular response to hydroperoxide	3/501	10/17943	0.0192684	Mgst1/Aif1/Dapk1	3
BP	GO:0071455	cellular response to hyperoxia	3/501	10/17943	0.0192684	Pparg/Egr1/Foxo1	3
BP	GO:0072203	cell proliferation involved in metanephros development	3/501	10/17943	0.0192684	Bmp7/Egr1/Myc	3
BP	GO:0030902	hindbrain development	14/501	209/17943	0.0195721	Bmp7/Crhr2/Fzd4/Myh10/Egr2/Gdf10/Prox1/Aif1/Ccr1/Cacna1a/Kcnc1/Fgf2/Ppargc1a/En1	14
BP	GO:2000027	regulation of animal organ morphogenesis	14/501	209/17943	0.0195721	Chad/Bmp7/Tnfrsf11b/Agt/Sfrp2/Edn1/Robo2/Myc/Tbx1/Eya1/Vegfa/Six2/Pim1/Fgf2	14
BP	GO:0031952	regulation of protein autophosphorylation	6/501	49/17943	0.0198572	Adipoq/Jun/Ptprc/Vegfa/Rassf2/Nek10	6
BP	GO:0050663	cytokine secretion	16/501	256/17943	0.0199329	Lep/Hdac9/Cidea/Agt/Vtcn1/Tlr5/Fcna/Aif1/Lpl/Serpinb1a/Il33/Ripk2/Rorc/Mapk14/Zc3h12a/Gbp1	16
BP	GO:0034599	cellular response to oxidative stress	19/501	329/17943	0.0199329	Atp2a2/Ankrd2/Mgst1/Fos/Ncf1/Serpine1/F3/Aif1/Cyp1b1/Jun/Klf2/Gpx1/Hspb1/Zc3h12a/Arntl/Foxo1/Dapk1/Ppargc1a/Nr4a3	19
BP	GO:0046942	carboxylic acid transport	19/501	329/17943	0.0199329	Slc7a10/Lep/Rbp4/Slc36a2/Slc1a3/Slc7a15/Agt/Pparg/Slc1a5/Edn1/Pla2g2a/Myc/Folr2/Sfxn1/Pla2g2d/Cacna1a/Slc38a3/Pla2g2c/Slc16a3	19
BP	GO:0007215	glutamate receptor signaling pathway	9/501	103/17943	0.0199329	Ccl2/Gria2/Adrb2/Kcnb1/Camk2a/Ptk2b/Cacng7/Dapk1/Ppargc1a	9
BP	GO:0050886	endocrine process	9/501	103/17943	0.0199329	Lep/Retn/Agt/Crhr2/Fzd4/Edn1/Cpa3/Tbx3/Inha	9
BP	GO:0014741	negative regulation of muscle hypertrophy	5/501	34/17943	0.0199329	Fbxo32/Igfbp5/Pi16/Smad3/Foxo1	5
BP	GO:0032743	positive regulation of interleukin-2 production	5/501	34/17943	0.0199329	Vtcn1/Ptprc/Ripk2/Pde4b/Pde4d	5
BP	GO:0035116	embryonic hindlimb morphogenesis	5/501	34/17943	0.0199329	Tp63/Pitx2/Tbx3/Zbtb16/Chd7	5
BP	GO:0071870	cellular response to catecholamine stimulus	5/501	34/17943	0.0199329	Adipoq/Pde4b/Pde4d/Nos1/Nr4a3	5
BP	GO:0006112	energy reserve metabolic process	8/501	84/17943	0.0199525	Lep/Pygl/Gbe1/Stbd1/Sorbs1/Phka1/Irs1/Ppp1r3c	8
BP	GO:0050729	positive regulation of inflammatory response	11/501	144/17943	0.0200985	Trem2/Cd6/Serpine1/Cebpa/Alox5ap/Ccl24/C1qa/Nfkbia/Lpl/Il33/Fcer1g	11
BP	GO:0006790	sulfur compound metabolic process	17/501	281/17943	0.0202627	Cdo1/Hs3st5/Mgst1/Gsta4/Phgdh/Gstt1/Hpgds/Fasn/Gstt3/Gstt2/Dgat2/Gstm5/Gpx3/Hbb/Gpx1/Cacna1a/Mical2	17
BP	GO:0009615	response to virus	17/501	281/17943	0.0202627	Rnase2/Cyp1a1/Cxadr/Map3k14/Fcna/Ifi27l2b/Mx1/Il33/Ddit4/Fgl2/Irf7/Ptprc/S100a6/Mx2/Hspb1/Mapk14/Zc3h12a	17
BP	GO:0015849	organic acid transport	19/501	330/17943	0.0202627	Slc7a10/Lep/Rbp4/Slc36a2/Slc1a3/Slc7a15/Agt/Pparg/Slc1a5/Edn1/Pla2g2a/Myc/Folr2/Sfxn1/Pla2g2d/Cacna1a/Slc38a3/Pla2g2c/Slc16a3	19
BP	GO:0002495	antigen processing and presentation of peptide antigen via MHC class II	4/501	21/17943	0.0202627	Trem2/RT1-Da/Fcer1g/RT1-Ba	4
BP	GO:0006837	serotonin transport	4/501	21/17943	0.0202627	Crhr2/Maob/Fcer1g/Nos1	4
BP	GO:0014874	response to stimulus involved in regulation of muscle adaptation	4/501	21/17943	0.0202627	Fbxo32/Myog/Agt/Ppargc1a	4
BP	GO:0034368	protein-lipid complex remodeling	4/501	21/17943	0.0202627	Lipg/Lpl/Abcg1/Pltp	4
BP	GO:0034369	plasma lipoprotein particle remodeling	4/501	21/17943	0.0202627	Lipg/Lpl/Abcg1/Pltp	4
BP	GO:0051593	response to folic acid	4/501	21/17943	0.0202627	Bche/Folr2/Gpx1/Vegfa	4
BP	GO:1901741	positive regulation of myoblast fusion	4/501	21/17943	0.0202627	Myog/Cd53/Mapk14/Myf6	4
BP	GO:0051147	regulation of muscle cell differentiation	12/501	166/17943	0.0202627	Ankrd2/Csrp3/Hdac9/Myog/Edn1/Pi16/Prox1/Cd53/Tbx1/Neu2/Mapk14/Myf6	12
BP	GO:0015711	organic anion transport	24/501	458/17943	0.0203661	Slc7a10/Lep/Rbp4/Slc36a2/Slc1a3/Slc7a15/Agt/Pparg/Slc1a5/Edn1/Pla2g2a/Myc/Folr2/Sfxn1/Pla2g2d/Abcg1/Pltp/Cacna1a/Slc38a3/Pla2g2c/Slc25a25/Slc16a3/Slc4a4/Slco4a1	24
BP	GO:0006909	phagocytosis	14/501	211/17943	0.0203661	Lep/Adipoq/Trem2/C4b/C4a/Ccl2/Tyrobp/Pparg/C2/Myo1g/Fcna/Aif1/Ptprc/Fcer1g	14
BP	GO:0006638	neutral lipid metabolic process	10/501	124/17943	0.0203661	Pck1/Thrsp/Scd/Ces1d/Lipg/Dgat2/Lpl/Gpx1/Ddhd2/Lpin1	10
BP	GO:0032368	regulation of lipid transport	10/501	124/17943	0.0203661	Lep/Adipoq/Retn/Lipg/Agt/Pparg/Edn1/Nfkbia/Abcg1/Pltp	10
BP	GO:0043467	regulation of generation of precursor metabolites and energy	10/501	124/17943	0.0203661	Ier3/Myog/Alox5/Myc/Ddit4/Sorbs1/Gpd1/Irs1/Ppp1r3c/Ppargc1a	10
BP	GO:0002702	positive regulation of production of molecular mediator of immune response	9/501	104/17943	0.0203661	Rbp4/Il33/Ptprc/Fcer1g/Gpi/Mapk14/Sema7a/Mzb1/Nr4a3	9
BP	GO:0019359	nicotinamide nucleotide biosynthetic process	9/501	104/17943	0.0203661	Ier3/Myog/Myc/Ddit4/LOC100362738/Gpi/Gpd1/Pkm/Ppargc1a	9
BP	GO:0019363	pyridine nucleotide biosynthetic process	9/501	104/17943	0.0203661	Ier3/Myog/Myc/Ddit4/LOC100362738/Gpi/Gpd1/Pkm/Ppargc1a	9
BP	GO:0032760	positive regulation of tumor necrosis factor production	9/501	104/17943	0.0203661	Lep/Ccl2/Tyrobp/Pf4/Lpl/Ptprc/Fcer1g/Ripk2/Hspb1	9
BP	GO:1900542	regulation of purine nucleotide metabolic process	9/501	104/17943	0.0203661	Trem2/Ier3/Myog/Myc/Tspo/Ddit4/Gpd1/Nos1/Ppargc1a	9
BP	GO:0046034	ATP metabolic process	16/501	258/17943	0.0203661	Myh6/Myh7/Trem2/Ier3/Ampd3/Myog/Myc/Tspo/Ddit4/Myh3/LOC100362738/Gpi/Gpd1/Pkm/Slc25a25/Ppargc1a	16
BP	GO:0042063	gliogenesis	20/501	356/17943	0.0203661	S100b/Trem2/Phgdh/Ccl2/Agt/Pparg/Egr1/Gap43/Egr2/Myc/C1qa/Tspo/Il33/Apcdd1/Klf15/Ptk2b/Gpr157/Aspa/Mt2A/Fgf2	20
BP	GO:0019933	cAMP-mediated signaling	13/501	189/17943	0.020665	Lep/Tshr/Ramp1/Arrdc3/Crhr2/Adrb2/Pf4/Pde3b/Adgre1/Pde4b/Crem/Pde4d/Nos1	13
BP	GO:0060043	regulation of cardiac muscle cell proliferation	6/501	50/17943	0.0207025	Rbp4/Zfpm2/Cxadr/Mapk14/Pim1/Fgf2	6
BP	GO:0006949	syncytium formation	7/501	67/17943	0.0207819	Pitx2/Trem2/Myog/Tyrobp/Cd53/Mapk14/Myf6	7
BP	GO:0090278	negative regulation of peptide hormone secretion	7/501	67/17943	0.0207819	Lep/Crhr2/Pparg/Pde3b/Kcnb1/Irs1/Nos1	7
BP	GO:0051924	regulation of calcium ion transport	17/501	283/17943	0.0209421	Casq2/Rrad/Serpine1/Ccl2/Agt/Crhr2/Adrb2/Ccr1/Tspo/Sln/Pde4b/Camk2a/Cacna1a/Ptk2b/Pde4d/Nos1/Chd7	17
BP	GO:0044270	cellular nitrogen compound catabolic process	24/501	460/17943	0.0209449	Ier3/Ampd3/Myog/Cidea/Dnase1l3/Zfp36/Myc/Ddit4/Blvrb/Nudt4/Btg2/Pde4b/LOC100362738/Gpi/Gpd1/Pkm/Ago2/Vegfa/Zc3h12a/Nt5c1a/Cacng7/Noct/Pde4d/Ppargc1a	24
BP	GO:0098542	defense response to other organism	25/501	487/17943	0.021262	Scd/Rnase2/Slpi/Ncf1/Serpine1/Plac8/Gbp4/Pf4/Tlr5/Acp5/Cxadr/Map3k14/Fcna/Mx1/Il33/Ddit4/Rarres2/Fgl2/Irf7/Ptprc/Fcer1g/Ripk2/Mx2/Zc3h12a/Gbp1	25
BP	GO:0006959	humoral immune response	13/501	190/17943	0.021262	Cfd/C6/Slpi/Cfi/C4b/C4a/Pf4/C2/C1qa/Fcna/Rarres2/Ptprc/Susd4	13
BP	GO:1903557	positive regulation of tumor necrosis factor superfamily cytokine production	9/501	105/17943	0.021262	Lep/Ccl2/Tyrobp/Pf4/Lpl/Ptprc/Fcer1g/Ripk2/Hspb1	9
BP	GO:0071216	cellular response to biotic stimulus	19/501	333/17943	0.021262	Trem2/Cd6/Serpine1/Ccl2/Pf4/Tlr5/Zfp36/Nfkbia/Tspo/Ankrd1/Jun/Cd68/Ripk2/Pde4b/Irak2/Mapk14/Zc3h12a/Pde4d/Ppargc1a	19
BP	GO:0035909	aorta morphogenesis	5/501	35/17943	0.021262	Prox1/Tbx1/Eya1/Adamts9/Chd7	5
BP	GO:0046320	regulation of fatty acid oxidation	5/501	35/17943	0.021262	Pparg/Dgat2/Irs1/Ppargc1a/Nr4a3	5
BP	GO:0070296	sarcoplasmic reticulum calcium ion transport	5/501	35/17943	0.021262	Atp2a2/Casq2/Sln/Pde4d/Chd7	5
BP	GO:0071868	cellular response to monoamine stimulus	5/501	35/17943	0.021262	Adipoq/Pde4b/Pde4d/Nos1/Nr4a3	5
BP	GO:0001558	regulation of cell growth	23/501	435/17943	0.0212782	Myl2/Lgi1/Rrad/Fhl1/Cdkn1a/Agt/Sfrp2/Pparg/Igfbp5/Edn1/Cgref1/Pi16/Cryab/Sema4a/Hbegf/Ptk2b/Map1b/Smad3/Sema7a/Vegfa/Wfdc1/Cacng7/Ostn	23
BP	GO:0060411	cardiac septum morphogenesis	8/501	86/17943	0.0216131	Pitx2/Bmp7/Zfpm2/Robo2/Prox1/Tbx3/Tbx1/Chd7	8
BP	GO:0007162	negative regulation of cell adhesion	17/501	285/17943	0.0220619	Adipoq/Serpine1/Vtcn1/Dusp1/Adrb2/Fzd4/Acp5/Pde3b/Rnd1/Cyp1b1/Apod/Ptprc/Pla2g2d/RT1-Ba/Vegfa/Zc3h12a/Gbp1	17
BP	GO:0008286	insulin receptor signaling pathway	10/501	126/17943	0.0220619	Lep/Cish/Csrp3/Agt/Rarres2/Sorbs1/Ptpn1/Irs1/Mzb1/Foxo1	10
BP	GO:0003044	regulation of systemic arterial blood pressure mediated by a chemical signal	6/501	51/17943	0.0222805	Agt/Adrb2/Edn1/Cpa3/Slc2a5/Pde4d	6
BP	GO:0071902	positive regulation of protein serine/threonine kinase activity	18/501	310/17943	0.0223601	Adipoq/Tpd52l1/Agt/Adrb2/Fzd4/Edn1/Prox1/Ret/Ptprc/Ripk2/Gadd45g/Ptpn1/Ptk2b/Vegfa/Fgd4/Pim1/Fgf2/Nek10	18
BP	GO:0010269	response to selenium ion	4/501	22/17943	0.0227513	Gstt1/Maob/Gpx3/Gpx1	4
BP	GO:0032800	receptor biosynthetic process	4/501	22/17943	0.0227513	Adipoq/Pparg/Edn1/Sec24a	4
BP	GO:0033194	response to hydroperoxide	4/501	22/17943	0.0227513	Mgst1/Aif1/Gpx1/Dapk1	4
BP	GO:0034367	protein-containing complex remodeling	4/501	22/17943	0.0227513	Lipg/Lpl/Abcg1/Pltp	4
BP	GO:0072215	regulation of metanephros development	4/501	22/17943	0.0227513	Adipoq/Egr1/Myc/Ret	4
BP	GO:0032642	regulation of chemokine production	8/501	87/17943	0.0228489	Adipoq/Trem2/Egr1/Aif1/Lpl/Il33/Apod/Ripk2	8
BP	GO:0021549	cerebellum development	11/501	148/17943	0.0228489	Crhr2/Fzd4/Myh10/Gdf10/Prox1/Aif1/Ccr1/Cacna1a/Kcnc1/Ppargc1a/En1	11
BP	GO:0042752	regulation of circadian rhythm	10/501	127/17943	0.0228489	Pparg/Kcna2/Prox1/Rorc/Klf10/Opn4/Arntl/Noct/Crem/Ppargc1a	10
BP	GO:0032635	interleukin-6 production	12/501	170/17943	0.0228489	Lep/Trem2/Tyrobp/Crhr2/Aif1/Lpl/Il33/Aqp4/Fcer1g/Ripk2/Klf2/Zc3h12a	12
BP	GO:0003263	cardioblast proliferation	3/501	11/17943	0.0228489	Tbx1/Eya1/Pim1	3
BP	GO:0006000	fructose metabolic process	3/501	11/17943	0.0228489	LOC100911725/Pfkfb4/Fbp2	3
BP	GO:0009125	nucleoside monophosphate catabolic process	3/501	11/17943	0.0228489	Ampd3/Nudt4/Nt5c1a	3
BP	GO:0031034	myosin filament assembly	3/501	11/17943	0.0228489	Myom3/Mybpc2/Myom2	3
BP	GO:0046485	ether lipid metabolic process	3/501	11/17943	0.0228489	Fasn/Agmo/Tmem86a	3
BP	GO:0046898	response to cycloheximide	3/501	11/17943	0.0228489	Serpine1/Myc/Klf2	3
BP	GO:0048845	venous blood vessel morphogenesis	3/501	11/17943	0.0228489	Pitx2/Prox1/Vegfa	3
BP	GO:0070391	response to lipoteichoic acid	3/501	11/17943	0.0228489	Trem2/Ripk2/Mapk14	3
BP	GO:0071223	cellular response to lipoteichoic acid	3/501	11/17943	0.0228489	Trem2/Ripk2/Mapk14	3
BP	GO:0048705	skeletal system morphogenesis	16/501	263/17943	0.0230329	Comp/Chad/Bmp7/Sfrp4/Sfrp2/Prrx2/Acp5/Barx2/Myc/Tbx1/Phospho1/Eya1/Mapk14/Smad3/Vegfa/Six2	16
BP	GO:0019218	regulation of steroid metabolic process	9/501	107/17943	0.0230329	Lep/Agt/Dgat2/Egr1/Prox1/Tspo/Abcg1/Rorc/Ppargc1a	9
BP	GO:0050848	regulation of calcium-mediated signaling	9/501	107/17943	0.0230329	Myoz2/Casq2/Fhl2/Trem2/Lmcd1/Tmem100/Ptk2b/Gbp1/Pde4d	9
BP	GO:0019432	triglyceride biosynthetic process	5/501	36/17943	0.0230329	Pck1/Thrsp/Dgat2/Lpl/Lpin1	5
BP	GO:0050885	neuromuscular process controlling balance	7/501	69/17943	0.0230329	Slc1a3/Myh10/Aldh1a3/Gm2a/Cacna1a/Ush1c/Nr4a3	7
BP	GO:0008406	gonad development	18/501	312/17943	0.0230329	Lep/Retn/Rbp4/Pitx2/Mgst1/Serpine1/Agt/Sfrp2/Zfpm2/Tlr5/Fzd4/Robo2/Myc/Cyp1b1/Ctsl/Vegfa/Inha/Fanca	18
BP	GO:0071322	cellular response to carbohydrate stimulus	14/501	216/17943	0.0230954	Pck1/Lep/Cma1/Serpine1/Ccl2/Crhr2/Pde3b/Myc/Aqp4/Ppp1r15a/Kcnb1/Gpx1/Slc2a5/Ppargc1a	14
BP	GO:0050709	negative regulation of protein secretion	11/501	149/17943	0.0233602	Hdac9/Cidea/Crhr2/Pde3b/Serpinb1a/Il33/Kcnb1/Zc3h12a/Gbp1/Irs1/Nos1	11
BP	GO:0009156	ribonucleoside monophosphate biosynthetic process	12/501	171/17943	0.0234128	Trem2/Ier3/Ampd3/Myog/Myc/Prps2/Ddit4/LOC100362738/Gpi/Gpd1/Pkm/Ppargc1a	12
BP	GO:0045981	positive regulation of nucleotide metabolic process	6/501	52/17943	0.0234128	Trem2/Myog/Myc/Gpd1/Nos1/Ppargc1a	6
BP	GO:0051196	regulation of coenzyme metabolic process	6/501	52/17943	0.0234128	Ier3/Myog/Myc/Ddit4/Gpd1/Ppargc1a	6
BP	GO:1900544	positive regulation of purine nucleotide metabolic process	6/501	52/17943	0.0234128	Trem2/Myog/Myc/Gpd1/Nos1/Ppargc1a	6
BP	GO:0002761	regulation of myeloid leukocyte differentiation	10/501	128/17943	0.0234586	Adipoq/Fos/Tyrobp/Pf4/Lrrc17/Myc/Ccr1/Jun/Klf10/Rassf2	10
BP	GO:0060041	retina development in camera-type eye	13/501	194/17943	0.023831	Rbp4/Fzd4/Myh10/Mdm1/Prox1/Cyp1b1/Arl6/Ret/Max/Vegfa/Lhx2/Ush1c/Chd7	13
BP	GO:0070838	divalent metal ion transport	25/501	494/17943	0.023831	Atp2a2/Casq2/Ramp1/Rrad/Slc39a8/Serpine1/Ccl2/Agt/Crhr2/Adrb2/Ccr1/Tspo/Slc30a3/Ptprc/Sln/Pde4b/Camk2a/Cacna1a/Ptk2b/Cacng7/Slc25a25/Fgf2/Pde4d/Nos1/Chd7	25
BP	GO:0006140	regulation of nucleotide metabolic process	9/501	108/17943	0.0240182	Trem2/Ier3/Myog/Myc/Tspo/Ddit4/Gpd1/Nos1/Ppargc1a	9
BP	GO:0051289	protein homotetramerization	9/501	108/17943	0.0240182	Tp63/Decr1/Aldh1a3/Aqp4/Gpx3/Shmt1/Rxrg/Kcnj12/Pkm	9
BP	GO:0006606	protein import into nucleus	11/501	150/17943	0.0242126	Lep/Cdkn1a/Agt/Nfkbia/Apod/Pola2/Fam53a/Mapk14/Zc3h12a/Six2/Arntl	11
BP	GO:0051385	response to mineralocorticoid	7/501	70/17943	0.0244886	Fosb/Fos/Serpine1/Cdkn1a/Edn1/Maob/Gpx3	7
BP	GO:0050867	positive regulation of cell activation	19/501	340/17943	0.0248862	Lep/Trem2/Cd6/Cdkn1a/Ccl2/Cebpa/Vtcn1/Tyrobp/Dpp4/C1qa/Aif1/Il33/Ptprc/Fcer1g/Ripk2/RT1-Ba/Zmiz1/Zbtb16/Nr4a3	19
BP	GO:0043405	regulation of MAP kinase activity	18/501	315/17943	0.0248898	Adipoq/Tpd52l1/Bmp7/Sfrp2/Dusp1/Fzd4/Edn1/Ret/Ptprc/Ripk2/Gadd45g/Ptpn1/Dusp4/Ptk2b/Vegfa/Fgd4/Fgf2/Nek10	18
BP	GO:1903578	regulation of ATP metabolic process	8/501	89/17943	0.0249496	Trem2/Ier3/Myog/Myc/Tspo/Ddit4/Gpd1/Ppargc1a	8
BP	GO:0071825	protein-lipid complex subunit organization	5/501	37/17943	0.0251804	Ces1d/Lipg/Lpl/Abcg1/Pltp	5
BP	GO:0032963	collagen metabolic process	9/501	109/17943	0.0251804	Retn/Mmp27/Serpine1/Ccl2/Pparg/Larp6/P3h2/Mmp23/Ctsl	9
BP	GO:0072525	pyridine-containing compound biosynthetic process	9/501	109/17943	0.0251804	Ier3/Myog/Myc/Ddit4/LOC100362738/Gpi/Gpd1/Pkm/Ppargc1a	9
BP	GO:0060612	adipose tissue development	6/501	53/17943	0.0251804	Lep/Arrdc3/Dgat2/Rorc/Slc25a25/Ppargc1a	6
BP	GO:0070741	response to interleukin-6	6/501	53/17943	0.0251804	Pck1/Cfi/Ccl2/Cebpa/Aqp4/Ppargc1a	6
BP	GO:0072511	divalent inorganic cation transport	25/501	497/17943	0.0251804	Atp2a2/Casq2/Ramp1/Rrad/Slc39a8/Serpine1/Ccl2/Agt/Crhr2/Adrb2/Ccr1/Tspo/Slc30a3/Ptprc/Sln/Pde4b/Camk2a/Cacna1a/Ptk2b/Cacng7/Slc25a25/Fgf2/Pde4d/Nos1/Chd7	25
BP	GO:0046628	positive regulation of insulin receptor signaling pathway	4/501	23/17943	0.0251804	Lep/Agt/Sorbs1/Irs1	4
BP	GO:0071285	cellular response to lithium ion	4/501	23/17943	0.0251804	Gsta4/Myog/Cebpa/Pparg	4
BP	GO:0001818	negative regulation of cytokine production	16/501	267/17943	0.0255157	Adipoq/Hdac9/Cidea/Tyrobp/Pparg/Acp5/Zfp36/Serpinb1a/Tspo/Il33/Aqp4/Apod/Ptprc/Klf2/Zc3h12a/Gbp1	16
BP	GO:0007389	pattern specification process	24/501	471/17943	0.0255157	Tp63/Pitx2/Emx2/Dnah5/Bmp7/Sfrp2/Edn1/Egr2/Robo2/C1qa/Hoxc6/Grem2/Tbx3/Tbx1/Btg2/Eya1/Myf6/Smad3/Six2/Lhx2/Fgf2/Zbtb16/Mical2/En1	24
BP	GO:0030879	mammary gland development	13/501	197/17943	0.0263916	Cdo1/Sfrp4/Fasn/Igfbp5/Alas2/Tbx3/Bcat2/Gpx1/Neurl1/Vegfa/Rreb1/Irs1/Fgf2	13
BP	GO:0006816	calcium ion transport	23/501	446/17943	0.0264209	Atp2a2/Casq2/Ramp1/Rrad/Serpine1/Ccl2/Agt/Crhr2/Adrb2/Ccr1/Tspo/Ptprc/Sln/Pde4b/Camk2a/Cacna1a/Ptk2b/Cacng7/Slc25a25/Fgf2/Pde4d/Nos1/Chd7	23
BP	GO:0045446	endothelial cell differentiation	9/501	110/17943	0.0264209	Agt/Fasn/Apold1/Arhgef26/Prox1/Tmem100/Gpx1/Vegfa/Pde4d	9
BP	GO:0006869	lipid transport	19/501	343/17943	0.0267088	Lep/Adipoq/Retn/Rbp4/Lipg/Agt/Pparg/Apold1/Fzd4/Edn1/Pla2g2a/Gm2a/Nfkbia/Tspo/Apod/Pla2g2d/Abcg1/Pltp/Pla2g2c	19
BP	GO:0010565	regulation of cellular ketone metabolic process	10/501	131/17943	0.0267088	Adipoq/Agt/Pparg/Dgat2/Egr1/Prox1/Cacna1a/Irs1/Ppargc1a/Nr4a3	10
BP	GO:0061138	morphogenesis of a branching epithelium	14/501	221/17943	0.0269963	Tp63/Rspo3/Pitx2/Bmp7/Agt/Sfrp2/Edn1/Myc/Prox1/Tbx3/Eya1/Vegfa/Six2/Fgf2	14
BP	GO:0031663	lipopolysaccharide-mediated signaling pathway	6/501	54/17943	0.0269963	Cd6/Ccl2/Nfkbia/Ripk2/Irak2/Mapk14	6
BP	GO:0032731	positive regulation of interleukin-1 beta production	6/501	54/17943	0.0269963	Tyrobp/Egr1/Lpl/Ripk2/Hspb1/Smad3	6
BP	GO:0043618	regulation of transcription from RNA polymerase II promoter in response to stress	6/501	54/17943	0.0269963	Ankrd2/Egr1/Jun/Ppp1r15a/Klf2/Vegfa	6
BP	GO:0045599	negative regulation of fat cell differentiation	6/501	54/17943	0.0269963	Adipoq/Zfpm2/Smad3/Vegfa/Arntl/Foxo1	6
BP	GO:0061383	trabecula morphogenesis	6/501	54/17943	0.0269963	Rbp4/Fhl2/Chad/Bmp7/Vegfa/Chd7	6
BP	GO:0072132	mesenchyme morphogenesis	6/501	54/17943	0.0269963	Bmp7/Robo2/Myc/Actc1/Tmem100/Smad3	6
BP	GO:0002429	immune response-activating cell surface receptor signaling pathway	13/501	198/17943	0.0270182	Vtcn1/Myo1g/Nfam1/Fcna/Cmtm3/Ptprc/Fcer1g/Ripk2/Pde4b/Zc3h12a/Gbp1/Pde4d/Nr4a3	13
BP	GO:0050731	positive regulation of peptidyl-tyrosine phosphorylation	13/501	198/17943	0.0270182	Lep/Adipoq/Trem2/Ncf1/Angpt4/Agt/Ptprc/Ripk2/Hbegf/Neurl1/Ptpn1/Ptk2b/Vegfa	13
BP	GO:0046460	neutral lipid biosynthetic process	5/501	38/17943	0.0271762	Pck1/Thrsp/Dgat2/Lpl/Lpin1	5
BP	GO:0046463	acylglycerol biosynthetic process	5/501	38/17943	0.0271762	Pck1/Thrsp/Dgat2/Lpl/Lpin1	5
BP	GO:0048146	positive regulation of fibroblast proliferation	7/501	72/17943	0.0271762	Serpine1/Cdkn1a/Agt/Myc/Jun/Zmiz1/Fntb	7
BP	GO:0048645	animal organ formation	7/501	72/17943	0.0271762	Tp63/Bmp7/Robo2/Tbx1/Eya1/Pim1/Fgf2	7
BP	GO:0071549	cellular response to dexamethasone stimulus	7/501	72/17943	0.0271762	Pck1/Fbxo32/Serpine1/Ccl2/Ddit4/Vegfa/Foxo1	7
BP	GO:0048145	regulation of fibroblast proliferation	9/501	111/17943	0.0271762	Serpine1/Cdkn1a/Agt/Pparg/Dach1/Myc/Jun/Zmiz1/Fntb	9
BP	GO:0006091	generation of precursor metabolites and energy	22/501	422/17943	0.0271762	Lep/Slc1a3/Ier3/Pygl/Cyb561/Myog/Alox5/Gbe1/Myc/Ddit4/Stbd1/Sorbs1/LOC100362738/Gpi/Gpd1/Phka1/Pkm/Slc25a25/Irs1/Ppp1r3c/Ppargc1a/Nr4a3	22
BP	GO:0003264	regulation of cardioblast proliferation	3/501	12/17943	0.0271762	Tbx1/Eya1/Pim1	3
BP	GO:0014745	negative regulation of muscle adaptation	3/501	12/17943	0.0271762	Igfbp5/Smad3/Foxo1	3
BP	GO:0032799	low-density lipoprotein receptor particle metabolic process	3/501	12/17943	0.0271762	Adipoq/Pparg/Sec24a	3
BP	GO:0048630	skeletal muscle tissue growth	3/501	12/17943	0.0271762	Chrnd/Crhr2/Adrb2	3
BP	GO:0051024	positive regulation of immunoglobulin secretion	3/501	12/17943	0.0271762	Rbp4/Il33/Gpi	3
BP	GO:0060213	positive regulation of nuclear-transcribed mRNA poly(A) tail shortening	3/501	12/17943	0.0271762	Zfp36/Btg2/Ago2	3
BP	GO:0061299	retina vasculature morphogenesis in camera-type eye	3/501	12/17943	0.0271762	Fzd4/Cyp1b1/Vegfa	3
BP	GO:0086103	G protein-coupled receptor signaling pathway involved in heart process	3/501	12/17943	0.0271762	Pde4b/Pde4d/Nos1	3
BP	GO:0048640	negative regulation of developmental growth	10/501	132/17943	0.0271762	Rbp4/Cdkn1a/Plac8/Sfrp2/Adrb2/Cxadr/Pi16/Sema4a/Sema7a/Ostn	10
BP	GO:0022409	positive regulation of cell-cell adhesion	15/501	246/17943	0.0272915	Lep/Bmp7/Cd6/Ccl2/Vtcn1/Dpp4/Aif1/Ptprc/Ripk2/RT1-Ba/Zmiz1/Adam19/Zbtb16/Pde4d/Nr4a3	15
BP	GO:0034764	positive regulation of transmembrane transport	15/501	246/17943	0.0272915	Adipoq/Slc36a2/Trem2/Ccl2/Agt/Adrb2/Alox5/Klf15/Sorbs1/Atp1b2/Mapk14/Kcnc1/Irs1/Nos1/Nr4a3	15
BP	GO:0097193	intrinsic apoptotic signaling pathway	17/501	295/17943	0.0274297	Tp63/Eda2r/Ankrd2/Ier3/Zfp385a/Zfp385b/Cdkn1a/Sfrp2/Dapk2/Myc/Cyp1b1/Ddit4/Gpx1/Hspb1/Ptpn1/Tp53bp2/Ppp1r13b	17
BP	GO:0019233	sensory perception of pain	11/501	154/17943	0.0275461	Scn1a/Ccl2/Crhr2/Adrb2/Edn1/Kcna2/Alox5/Tmem100/Cacna1a/Zfhx2/Nos1	11
BP	GO:0000289	nuclear-transcribed mRNA poly(A) tail shortening	4/501	24/17943	0.027825	Zfp36/Btg2/Ago2/Noct	4
BP	GO:0038093	Fc receptor signaling pathway	4/501	24/17943	0.027825	Myo1g/Ptprc/Fcer1g/Nr4a3	4
BP	GO:0051195	negative regulation of cofactor metabolic process	4/501	24/17943	0.027825	Ier3/Myog/Ddit4/Ppargc1a	4
BP	GO:0072677	eosinophil migration	4/501	24/17943	0.027825	Ccl2/Ccl6/Dapk2/Ccl24	4
BP	GO:1901739	regulation of myoblast fusion	4/501	24/17943	0.027825	Myog/Cd53/Mapk14/Myf6	4
BP	GO:0009746	response to hexose	17/501	296/17943	0.0280901	Pck1/Adipoq/Nnat/Cma1/Serpine1/Ccl2/Crhr2/Egr1/Pde3b/Aqp4/Kcnb1/Gpx1/Ctsl/Ptk2b/Mapk14/Slc2a5/Ppargc1a	17
BP	GO:0006754	ATP biosynthetic process	10/501	133/17943	0.0282173	Trem2/Ier3/Myog/Myc/Ddit4/LOC100362738/Gpi/Gpd1/Pkm/Ppargc1a	10
BP	GO:0032602	chemokine production	8/501	92/17943	0.0282173	Adipoq/Trem2/Egr1/Aif1/Lpl/Il33/Apod/Ripk2	8
BP	GO:0042116	macrophage activation	8/501	92/17943	0.0282173	Trem2/Cebpa/Tyrobp/Pparg/C1qa/Aif1/Il33/Jun	8
BP	GO:0001523	retinoid metabolic process	6/501	55/17943	0.0282173	Rbp4/Cyp1a1/Dgat2/Aldh1a3/Cyp1b1/Rarres2	6
BP	GO:0017001	antibiotic catabolic process	6/501	55/17943	0.0282173	Pck1/Hba-a1/Hba-a2/Gpx3/Hbb/Gpx1	6
BP	GO:0001707	mesoderm formation	7/501	73/17943	0.0283553	Bmp7/Sfrp2/Eya1/Gpi/Smad3/Six2/Nr4a3	7
BP	GO:0006865	amino acid transport	11/501	155/17943	0.0283553	Slc7a10/Lep/Slc36a2/Slc1a3/Slc7a15/Agt/Slc1a5/Myc/Sfxn1/Cacna1a/Slc38a3	11
BP	GO:0051170	import into nucleus	11/501	155/17943	0.0283553	Lep/Cdkn1a/Agt/Nfkbia/Apod/Pola2/Fam53a/Mapk14/Zc3h12a/Six2/Arntl	11
BP	GO:0022407	regulation of cell-cell adhesion	21/501	399/17943	0.0287056	Lep/Adipoq/Bmp7/Cd6/Ccl2/Vtcn1/Dpp4/Adrb2/Aif1/Ptprc/Pla2g2d/Ripk2/RT1-Ba/Zmiz1/Adam19/Mapk14/Vegfa/Zc3h12a/Zbtb16/Pde4d/Nr4a3	21
BP	GO:0002262	myeloid cell homeostasis	12/501	178/17943	0.0290488	Ampd3/Zfp36/Sfxn1/Alas2/Hba-a2/Fcer1g/Klf2/Hbb/Pde4b/Gpi/Mapk14/Vegfa	12
BP	GO:0043409	negative regulation of MAPK cascade	12/501	178/17943	0.0290488	Adipoq/Bmp7/Sfrp4/Sfrp2/Dusp1/Myc/Sh3rf2/Ptprc/Ptpn1/Dusp4/Gbp1/Foxo1	12
BP	GO:0030810	positive regulation of nucleotide biosynthetic process	5/501	39/17943	0.0291186	Trem2/Myc/Gpd1/Nos1/Ppargc1a	5
BP	GO:0042554	superoxide anion generation	5/501	39/17943	0.0291186	Ncf1/Agt/Tyrobp/Acp5/Edn1	5
BP	GO:1900373	positive regulation of purine nucleotide biosynthetic process	5/501	39/17943	0.0291186	Trem2/Myc/Gpd1/Nos1/Ppargc1a	5
BP	GO:0003002	regionalization	20/501	374/17943	0.0292505	Tp63/Pitx2/Emx2/Sfrp2/Edn1/Egr2/Robo2/C1qa/Hoxc6/Grem2/Tbx3/Tbx1/Btg2/Myf6/Smad3/Six2/Lhx2/Fgf2/Zbtb16/En1	20
BP	GO:0016054	organic acid catabolic process	14/501	225/17943	0.0293768	Pck1/Lep/Adipoq/Ces1d/Cdo1/Decr1/Ddah1/Bcat2/Shmt1/Irs1/Cyp4f18/Fgf2/Nos1/Lpin1	14
BP	GO:0046395	carboxylic acid catabolic process	14/501	225/17943	0.0293768	Pck1/Lep/Adipoq/Ces1d/Cdo1/Decr1/Ddah1/Bcat2/Shmt1/Irs1/Cyp4f18/Fgf2/Nos1/Lpin1	14
BP	GO:0050707	regulation of cytokine secretion	14/501	225/17943	0.0293768	Hdac9/Cidea/Agt/Vtcn1/Tlr5/Fcna/Aif1/Lpl/Serpinb1a/Il33/Ripk2/Mapk14/Zc3h12a/Gbp1	14
BP	GO:0050766	positive regulation of phagocytosis	7/501	74/17943	0.0300824	C4b/C4a/Ccl2/Pparg/C2/Ptprc/Fcer1g	7
BP	GO:0010828	positive regulation of glucose transmembrane transport	6/501	56/17943	0.0302316	Adipoq/Klf15/Sorbs1/Mapk14/Irs1/Nr4a3	6
BP	GO:0048144	fibroblast proliferation	9/501	114/17943	0.0307721	Serpine1/Cdkn1a/Agt/Pparg/Dach1/Myc/Jun/Zmiz1/Fntb	9
BP	GO:0010669	epithelial structure maintenance	4/501	25/17943	0.031329	Rbp4/Cxadr/Ldb2/Crocc	4
BP	GO:1905523	positive regulation of macrophage migration	4/501	25/17943	0.031329	Trem2/Ccl2/Rarres2/Mapk14	4
BP	GO:0019722	calcium-mediated signaling	14/501	227/17943	0.0314813	Atp2a2/Myoz2/Casq2/Fhl2/Trem2/Lmcd1/Edn1/Cxcr5/Ccr1/Tmem100/Ptprc/Ptk2b/Gbp1/Pde4d	14
BP	GO:0045834	positive regulation of lipid metabolic process	11/501	158/17943	0.031913	Adipoq/Agt/Pparg/Dgat2/Abcg1/Sorbs1/Ptk2b/Irs1/Fgf2/Ppargc1a/Nr4a3	11
BP	GO:1905521	regulation of macrophage migration	5/501	40/17943	0.031913	Trem2/Ccl2/Rarres2/Ptk2b/Mapk14	5
BP	GO:0005977	glycogen metabolic process	7/501	75/17943	0.031913	Pygl/Gbe1/Stbd1/Sorbs1/Phka1/Irs1/Ppp1r3c	7
BP	GO:0006073	cellular glucan metabolic process	7/501	75/17943	0.031913	Pygl/Gbe1/Stbd1/Sorbs1/Phka1/Irs1/Ppp1r3c	7
BP	GO:0010332	response to gamma radiation	7/501	75/17943	0.031913	Cdkn1a/Ccl2/Egr1/Myc/Cryab/Ptprc/Gpx1	7
BP	GO:0044042	glucan metabolic process	7/501	75/17943	0.031913	Pygl/Gbe1/Stbd1/Sorbs1/Phka1/Irs1/Ppp1r3c	7
BP	GO:0051224	negative regulation of protein transport	13/501	204/17943	0.0320025	Adipoq/Hdac9/Cidea/Crhr2/Pde3b/Serpinb1a/Il33/Apod/Kcnb1/Zc3h12a/Gbp1/Irs1/Nos1	13
BP	GO:0051187	cofactor catabolic process	6/501	57/17943	0.0321984	Hba-a1/Blvrb/Hba-a2/Gpx3/Hbb/Gpx1	6
BP	GO:1900449	regulation of glutamate receptor signaling pathway	6/501	57/17943	0.0321984	Ccl2/Adrb2/Ptk2b/Cacng7/Dapk1/Ppargc1a	6
BP	GO:0007501	mesodermal cell fate specification	3/501	13/17943	0.0321984	Sfrp2/Eya1/Six2	3
BP	GO:0010889	regulation of sequestering of triglyceride	3/501	13/17943	0.0321984	Cidea/Pparg/Lpl	3
BP	GO:0014012	peripheral nervous system axon regeneration	3/501	13/17943	0.0321984	Tspo/Apod/Map1b	3
BP	GO:0031033	myosin filament organization	3/501	13/17943	0.0321984	Myom3/Mybpc2/Myom2	3
BP	GO:0031953	negative regulation of protein autophosphorylation	3/501	13/17943	0.0321984	Adipoq/Jun/Ptprc	3
BP	GO:0032275	luteinizing hormone secretion	3/501	13/17943	0.0321984	Lep/Crhr2/Tbx3	3
BP	GO:0048742	regulation of skeletal muscle fiber development	3/501	13/17943	0.0321984	Hdac9/Myog/Myf6	3
BP	GO:0090193	positive regulation of glomerulus development	3/501	13/17943	0.0321984	Adipoq/Egr1/Ret	3
BP	GO:0045638	negative regulation of myeloid cell differentiation	8/501	95/17943	0.0325599	Adipoq/Pf4/Lrrc17/Zfp36/Myc/Nfkbia/Ptk2b/Zbtb16	8
BP	GO:0072006	nephron development	11/501	159/17943	0.0327037	Adipoq/Bmp7/Agt/Egr1/Myc/Ret/Klf15/Eya1/Vegfa/Six2/Fgf2	11
BP	GO:0006633	fatty acid biosynthetic process	10/501	137/17943	0.0327636	Scd/Lipg/Tecrl/Hpgds/Agt/Fasn/Pparg/Edn1/Lpl/Prkab2	10
BP	GO:0010959	regulation of metal ion transport	22/501	433/17943	0.0337469	Casq2/Trem2/Rrad/Serpine1/Fhl1/Ccl2/Agt/Crhr2/Adrb2/Fxyd6/Ccr1/Tspo/Sln/Pde4b/Camk2a/Cacna1a/Ptk2b/Atp1b2/Kcnc1/Pde4d/Nos1/Chd7	22
BP	GO:0022037	metencephalon development	11/501	160/17943	0.034125	Crhr2/Fzd4/Myh10/Gdf10/Prox1/Aif1/Ccr1/Cacna1a/Kcnc1/Ppargc1a/En1	11
BP	GO:0072001	renal system development	19/501	355/17943	0.034229	Adipoq/Tp63/Rbp4/Emx2/Bmp7/Agt/Egr1/Robo2/Aldh1a3/Myc/Prox1/Ret/Klf15/Eya1/Smad3/Vegfa/Six2/Fgf2/Zbtb16	19
BP	GO:0043620	regulation of DNA-templated transcription in response to stress	6/501	58/17943	0.034578	Ankrd2/Egr1/Jun/Ppp1r15a/Klf2/Vegfa	6
BP	GO:0046503	glycerolipid catabolic process	6/501	58/17943	0.034578	Ces1d/Lipg/Pla2g4e/Lpl/Pla2g15/Ddhd2	6
BP	GO:0002504	antigen processing and presentation of peptide or polysaccharide antigen via MHC class II	4/501	26/17943	0.0347778	Trem2/RT1-Da/Fcer1g/RT1-Ba	4
BP	GO:0071677	positive regulation of mononuclear cell migration	4/501	26/17943	0.0347778	Serpine1/Ccl2/Aif1/Ccr1	4
BP	GO:0089718	amino acid import across plasma membrane	4/501	26/17943	0.0347778	Slc36a2/Slc1a3/Agt/Slc1a5	4
BP	GO:0097067	cellular response to thyroid hormone stimulus	4/501	26/17943	0.0347778	Myh6/Myh7/Ctsl/Ppargc1a	4
BP	GO:0032675	regulation of interleukin-6 production	11/501	161/17943	0.0353384	Trem2/Tyrobp/Crhr2/Aif1/Lpl/Il33/Aqp4/Fcer1g/Ripk2/Klf2/Zc3h12a	11
BP	GO:0016311	dephosphorylation	23/501	462/17943	0.0353384	Dusp1/Acp5/Ccdc8/Ppp1r27/Sh3rf2/Ppp1r15a/Ptprc/Phospho1/Eya4/Ptpn1/Eya1/Dusp4/Cdc14a/Dupd1/Smad3/LOC100911725/Nt5dc3/Nt5c1a/Pfkfb4/Fbp2/Ppp1r3c/Lrrc30/Lpin1	23
BP	GO:0051090	regulation of DNA-binding transcription factor activity	21/501	409/17943	0.0355132	Eda2r/Csrp3/Sfrp4/Crhr2/Pparg/Fzd4/Edn1/Nfam1/Nfkbia/Prox1/Cyp1b1/Jun/Ripk2/Tceal7/Camk2a/Irak2/Vegfa/Zc3h12a/Pim1/Fanca/Ppargc1a	21
BP	GO:0014855	striated muscle cell proliferation	7/501	77/17943	0.0355132	Rbp4/Myog/Zfpm2/Cxadr/Mapk14/Pim1/Fgf2	7
BP	GO:0034637	cellular carbohydrate biosynthetic process	7/501	77/17943	0.0355132	Pck1/Lep/Gbe1/Sorbs1/Irs1/Fbp2/Ppp1r3c	7
BP	GO:0001656	metanephros development	8/501	97/17943	0.0360232	Adipoq/Bmp7/Egr1/Robo2/Myc/Ret/Eya1/Six2	8
BP	GO:0009062	fatty acid catabolic process	8/501	97/17943	0.0360232	Pck1/Lep/Adipoq/Ces1d/Decr1/Irs1/Cyp4f18/Lpin1	8
BP	GO:0001755	neural crest cell migration	6/501	59/17943	0.0369651	Pitx2/Bmp7/Sema4a/Ret/Tbx1/Sema7a	6
BP	GO:0050922	negative regulation of chemotaxis	6/501	59/17943	0.0369651	Ccl2/Dusp1/Robo2/Aif1/Sema4a/Sema7a	6
BP	GO:0061041	regulation of wound healing	10/501	140/17943	0.0370904	Serpine1/Cdkn1a/Ccl2/Adrb2/Fcer1g/Hbegf/Smad3/Wfdc1/Rreb1/Fgf2	10
BP	GO:0072331	signal transduction by p53 class mediator	10/501	140/17943	0.0370904	Tp63/Eda2r/Ankrd2/Zfp385a/Zfp385b/Cdkn1a/Ddit4/Ankrd1/Tp53bp2/Ppp1r13b	10
BP	GO:1903708	positive regulation of hemopoiesis	13/501	209/17943	0.0372778	Lep/Fos/Tyrobp/Pf4/Ccr1/Jun/Ptprc/Ripk2/RT1-Ba/Zmiz1/Klf10/Mapk14/Zbtb16	13
BP	GO:1904950	negative regulation of establishment of protein localization	13/501	209/17943	0.0372778	Adipoq/Hdac9/Cidea/Crhr2/Pde3b/Serpinb1a/Il33/Apod/Kcnb1/Zc3h12a/Gbp1/Irs1/Nos1	13
BP	GO:0043270	positive regulation of ion transport	18/501	333/17943	0.0372778	Lep/Slc36a2/Trem2/Serpine1/Fhl1/Ccl2/Agt/Crhr2/Adrb2/Edn1/Alox5/Ccr1/Tspo/Camk2a/Atp1b2/Kcnc1/Slc38a3/Nos1	18
BP	GO:2000279	negative regulation of DNA biosynthetic process	5/501	42/17943	0.0373102	Adipoq/Dusp1/Pparg/Dach1/Ankrd1	5
BP	GO:2000826	regulation of heart morphogenesis	5/501	42/17943	0.0373102	Bmp7/Robo2/Tbx1/Eya1/Pim1	5
BP	GO:0031670	cellular response to nutrient	8/501	98/17943	0.0377976	Lep/Serpine1/Ccl2/Pparg/Folr2/Lpl/Cib2/Pim1	8
BP	GO:0015718	monocarboxylic acid transport	11/501	163/17943	0.0378677	Lep/Rbp4/Pparg/Edn1/Pla2g2a/Myc/Pla2g2d/Cacna1a/Slc38a3/Pla2g2c/Slc16a3	11
BP	GO:0009205	purine ribonucleoside triphosphate metabolic process	16/501	283/17943	0.037913	Myh6/Myh7/Trem2/Ier3/Ampd3/Myog/Myc/Tspo/Ddit4/Myh3/LOC100362738/Gpi/Gpd1/Pkm/Slc25a25/Ppargc1a	16
BP	GO:0042698	ovulation cycle	9/501	119/17943	0.0379354	Lep/Retn/Agt/Adrb2/Fzd4/Egr1/Robo2/Gdf10/Cyp1b1	9
BP	GO:0048839	inner ear development	14/501	234/17943	0.0381091	Tshr/Kcnk3/Cebpa/Prrx2/Cebpd/Aldh1a3/Prox1/Tbx1/Eya4/Eya1/Maf/Ush1c/Chd7/Nr4a3	14
BP	GO:0050679	positive regulation of epithelial cell proliferation	13/501	210/17943	0.0381091	Tp63/Ccl2/F3/Myc/Ccl24/Prox1/Jun/Tbx1/Eya1/Vegfa/Rreb1/Fgf2/Nr4a3	13
BP	GO:0009812	flavonoid metabolic process	3/501	14/17943	0.0381091	Cyp1a1/Myc/Ppargc1a	3
BP	GO:0042693	muscle cell fate commitment	3/501	14/17943	0.0381091	Myl2/Tbx3/Tbx1	3
BP	GO:0060211	regulation of nuclear-transcribed mRNA poly(A) tail shortening	3/501	14/17943	0.0381091	Zfp36/Btg2/Ago2	3
BP	GO:1904396	regulation of neuromuscular junction development	3/501	14/17943	0.0381091	Fzd9/Colq/Sorbs1	3
BP	GO:0002526	acute inflammatory response	10/501	141/17943	0.0381091	C6/Cd6/Dnase1l3/Cebpa/Pparg/Alox5ap/Alox5/F3/Fcer1g/Susd4	10
BP	GO:0033135	regulation of peptidyl-serine phosphorylation	10/501	141/17943	0.0381091	Agt/Sfrp2/Ddit4/Ret/Ppp1r15a/Ripk2/Vegfa/Rassf2/Pde4d/Nos1	10
BP	GO:0007263	nitric oxide mediated signal transduction	4/501	27/17943	0.0382146	Rasd1/Vegfa/Mt2A/Nos1	4
BP	GO:0009154	purine ribonucleotide catabolic process	4/501	27/17943	0.0382146	Ampd3/Nudt4/Pde4b/Pde4d	4
BP	GO:0033197	response to vitamin E	4/501	27/17943	0.0382146	Lep/Gstt1/Pparg/Nos1	4
BP	GO:0060343	trabecula formation	4/501	27/17943	0.0382146	Rbp4/Fhl2/Chad/Vegfa	4
BP	GO:1900078	positive regulation of cellular response to insulin stimulus	4/501	27/17943	0.0382146	Lep/Agt/Sorbs1/Irs1	4
BP	GO:1902042	negative regulation of extrinsic apoptotic signaling pathway via death domain receptors	4/501	27/17943	0.0382146	Serpine1/Sfrp2/Gpx1/Dapk1	4
BP	GO:0048008	platelet-derived growth factor receptor signaling pathway	6/501	60/17943	0.0387545	Adipoq/F3/Apod/Ptpn1/Vegfa/Nr4a3	6
BP	GO:0060038	cardiac muscle cell proliferation	6/501	60/17943	0.0387545	Rbp4/Zfpm2/Cxadr/Mapk14/Pim1/Fgf2	6
BP	GO:2001237	negative regulation of extrinsic apoptotic signaling pathway	8/501	99/17943	0.039118	Serpine1/Sfrp2/Pf4/Gpx1/Eya4/Eya1/Vegfa/Dapk1	8
BP	GO:0001704	formation of primary germ layer	9/501	120/17943	0.039118	Bmp7/Sfrp2/Eya1/Gpi/Smad3/Lama3/Lamb3/Six2/Nr4a3	9
BP	GO:1900015	regulation of cytokine production involved in inflammatory response	5/501	43/17943	0.0400223	Lep/Cd6/Apod/Mapk14/Zc3h12a	5
BP	GO:1903523	negative regulation of blood circulation	5/501	43/17943	0.0400223	Lep/Atp2a2/Zc3h12a/Pde4d/Nos1	5
BP	GO:0070374	positive regulation of ERK1 and ERK2 cascade	14/501	236/17943	0.0401313	Trem2/Ccl2/Ccl6/Pla2g2a/Ccl24/Ccr1/Jun/Ptprc/Ripk2/Ptk2b/Sema7a/Vegfa/Fgf2/Ntsr2	14
BP	GO:0009206	purine ribonucleoside triphosphate biosynthetic process	10/501	143/17943	0.0410888	Trem2/Ier3/Myog/Myc/Ddit4/LOC100362738/Gpi/Gpd1/Pkm/Ppargc1a	10
BP	GO:0034101	erythrocyte homeostasis	10/501	143/17943	0.0410888	Ampd3/Zfp36/Sfxn1/Alas2/Hba-a2/Klf2/Hbb/Gpi/Mapk14/Vegfa	10
BP	GO:0010660	regulation of muscle cell apoptotic process	8/501	100/17943	0.0410888	Fbxo32/Agt/Sfrp2/Pparg/Edn1/Camk2a/Ptk2b/Zc3h12a	8
BP	GO:0009914	hormone transport	20/501	390/17943	0.0410888	Lep/Adipoq/Retn/Rbp4/Nnat/Agt/Crhr2/Pparg/Fzd4/Edn1/Pde3b/Tbx3/Kcnb1/Cacna1a/Inha/Arntl/Irs1/Nos1/Chd7/Slco4a1	20
BP	GO:0071214	cellular response to abiotic stimulus	20/501	390/17943	0.0410888	Pck1/Sncg/Serpine1/Cdkn1a/Myog/Agt/Sfrp2/Tlr5/Egr1/Myc/Cryab/Map3k14/Tspo/Ankrd1/Ppp1r15a/Mapk14/Slc38a3/Opn4/Irs1/Nos1	20
BP	GO:0104004	cellular response to environmental stimulus	20/501	390/17943	0.0410888	Pck1/Sncg/Serpine1/Cdkn1a/Myog/Agt/Sfrp2/Tlr5/Egr1/Myc/Cryab/Map3k14/Tspo/Ankrd1/Ppp1r15a/Mapk14/Slc38a3/Opn4/Irs1/Nos1	20
BP	GO:0060359	response to ammonium ion	12/501	189/17943	0.0412295	Fosb/Sncg/Egr1/Myc/Rgs10/Aif1/Ppp1r15a/Sorbs1/Gpi/Ptk2b/Nos1/En1	12
BP	GO:0009749	response to glucose	16/501	287/17943	0.0415601	Pck1/Adipoq/Nnat/Cma1/Serpine1/Ccl2/Crhr2/Egr1/Pde3b/Aqp4/Kcnb1/Gpx1/Ctsl/Ptk2b/Mapk14/Ppargc1a	16
BP	GO:0051235	maintenance of location	18/501	339/17943	0.0424428	Lep/Casq2/Cidea/Pparg/Dgat2/Kdelr3/Gm2a/Nfkbia/Lpl/Tspo/Slc30a3/Ptprc/Abcg1/Ptk2b/Zc3h12a/Fgf2/Pde4d/Chd7	18
BP	GO:0009261	ribonucleotide catabolic process	4/501	28/17943	0.0424428	Ampd3/Nudt4/Pde4b/Pde4d	4
BP	GO:0032692	negative regulation of interleukin-1 production	4/501	28/17943	0.0424428	Acp5/Serpinb1a/Aqp4/Zc3h12a	4
BP	GO:0045662	negative regulation of myoblast differentiation	4/501	28/17943	0.0424428	Ankrd2/Csrp3/Tbx3/Nmrk2	4
BP	GO:0045822	negative regulation of heart contraction	4/501	28/17943	0.0424428	Atp2a2/Zc3h12a/Pde4d/Nos1	4
BP	GO:0060045	positive regulation of cardiac muscle cell proliferation	4/501	28/17943	0.0424428	Zfpm2/Mapk14/Pim1/Fgf2	4
BP	GO:0008360	regulation of cell shape	10/501	144/17943	0.0424428	S100b/Ccl2/Myh10/Cdc42ep2/Ccl24/Rnd1/Sema4a/Ptk2b/Vegfa/Fgd4	10
BP	GO:0009145	purine nucleoside triphosphate biosynthetic process	10/501	144/17943	0.0424428	Trem2/Ier3/Myog/Myc/Ddit4/LOC100362738/Gpi/Gpd1/Pkm/Ppargc1a	10
BP	GO:0002768	immune response-regulating cell surface receptor signaling pathway	13/501	214/17943	0.0426235	Vtcn1/Myo1g/Nfam1/Fcna/Cmtm3/Ptprc/Fcer1g/Ripk2/Pde4b/Zc3h12a/Gbp1/Pde4d/Nr4a3	13
BP	GO:0051216	cartilage development	13/501	214/17943	0.0426235	Lep/Comp/Chad/Sfrp2/Prrx2/Edn1/Barx2/Mapk14/Smad3/Maf/Six2/Fgf2/Zbtb16	13
BP	GO:0071241	cellular response to inorganic substance	17/501	314/17943	0.0428961	Fosb/Fos/Gsta4/Ncf1/Serpine1/Kcnk3/Myog/Cebpa/Pparg/Cyp1a1/Edn1/Alox5ap/Tspo/Jun/Mt2A/Foxo1/Ppargc1a	17
BP	GO:0033189	response to vitamin A	5/501	44/17943	0.0428961	Pitx2/Pparg/Cyp1a1/Map1b/Vegfa	5
BP	GO:0055023	positive regulation of cardiac muscle tissue growth	5/501	44/17943	0.0428961	Zfpm2/Edn1/Mapk14/Pim1/Fgf2	5
BP	GO:1903580	positive regulation of ATP metabolic process	5/501	44/17943	0.0428961	Trem2/Myog/Myc/Gpd1/Ppargc1a	5
BP	GO:0030500	regulation of bone mineralization	7/501	81/17943	0.0433382	Comp/Bmp7/Fzd9/Adrb2/Ccr1/Ptk2b/Smad3	7
BP	GO:0060348	bone development	14/501	239/17943	0.0433487	Lep/Pitx2/Comp/Chad/Zfp385a/Tyrobp/Sfrp4/Sfrp2/Lrrc17/Acp5/Trim45/Ptprc/Phospho1/Ttc9	14
BP	GO:0009199	ribonucleoside triphosphate metabolic process	16/501	289/17943	0.0433774	Myh6/Myh7/Trem2/Ier3/Ampd3/Myog/Myc/Tspo/Ddit4/Myh3/LOC100362738/Gpi/Gpd1/Pkm/Slc25a25/Ppargc1a	16
BP	GO:0032722	positive regulation of chemokine production	6/501	62/17943	0.0436552	Adipoq/Egr1/Aif1/Lpl/Il33/Ripk2	6
BP	GO:0032732	positive regulation of interleukin-1 production	6/501	62/17943	0.0436552	Tyrobp/Egr1/Lpl/Ripk2/Hspb1/Smad3	6
BP	GO:0031331	positive regulation of cellular catabolic process	19/501	367/17943	0.0438223	Trem2/Zfand2a/Adrb2/Zfp36/Myc/Sh3rf2/Rnf144b/Il33/Ripk2/Btg2/Ptpn1/Ptk2b/Gpd1/Ago2/Zc3h12a/Rnf139/Irs1/Foxo1/Dapk1	19
BP	GO:0051952	regulation of amine transport	9/501	123/17943	0.0438223	Lep/Slc36a2/Sncg/Agt/Crhr2/Kcna2/Kcnb1/Cacna1a/Slc38a3	9
BP	GO:1902107	positive regulation of leukocyte differentiation	11/501	168/17943	0.0438223	Fos/Tyrobp/Pf4/Ccr1/Jun/Ptprc/Ripk2/RT1-Ba/Zmiz1/Klf10/Zbtb16	11
BP	GO:0006662	glycerol ether metabolic process	3/501	15/17943	0.0438223	Fasn/Agmo/Tmem86a	3
BP	GO:0009750	response to fructose	3/501	15/17943	0.0438223	Pck1/Slc2a5/Ppargc1a	3
BP	GO:0032276	regulation of gonadotropin secretion	3/501	15/17943	0.0438223	Lep/Crhr2/Inha	3
BP	GO:0034433	steroid esterification	3/501	15/17943	0.0438223	Scd/Agt/Abcg1	3
BP	GO:0034434	sterol esterification	3/501	15/17943	0.0438223	Scd/Agt/Abcg1	3
BP	GO:0034435	cholesterol esterification	3/501	15/17943	0.0438223	Scd/Agt/Abcg1	3
BP	GO:0042574	retinal metabolic process	3/501	15/17943	0.0438223	Rbp4/Aldh1a3/Cyp1b1	3
BP	GO:0001763	morphogenesis of a branching structure	14/501	240/17943	0.0441427	Tp63/Rspo3/Pitx2/Bmp7/Agt/Sfrp2/Edn1/Myc/Prox1/Tbx3/Eya1/Vegfa/Six2/Fgf2	14
BP	GO:0055024	regulation of cardiac muscle tissue development	8/501	102/17943	0.0441828	Rbp4/Zfpm2/Edn1/Cxadr/Pi16/Mapk14/Pim1/Fgf2	8
BP	GO:0110110	positive regulation of animal organ morphogenesis	8/501	102/17943	0.0441828	Bmp7/Agt/Edn1/Robo2/Myc/Vegfa/Pim1/Fgf2	8
BP	GO:0044403	symbiont process	19/501	368/17943	0.0443758	Scd/Pik3c2g/Hs3st5/Slpi/Ncf1/Gbp4/Pf4/Zfp36/Dynlt1/Myc/Fcna/Prox1/Slc20a2/Jun/Mx2/Gpx1/Smad3/Zc3h12a/Gbp1	19
BP	GO:0046883	regulation of hormone secretion	17/501	316/17943	0.0444389	Lep/Adipoq/Retn/Rbp4/Nnat/Agt/Crhr2/Pparg/Edn1/Pde3b/Kcnb1/Cacna1a/Inha/Arntl/Irs1/Nos1/Chd7	17
BP	GO:0006163	purine nucleotide metabolic process	23/501	476/17943	0.0450252	Myh6/Myh7/Trem2/Ier3/Ampd3/Myog/Fasn/Dgat2/Myc/Prps2/Tspo/Ddit4/Myh3/Nudt4/Pde4b/LOC100362738/Gpi/Gpd1/Pkm/Slc25a25/Pde4d/Nos1/Ppargc1a	23
BP	GO:0009144	purine nucleoside triphosphate metabolic process	16/501	291/17943	0.0451499	Myh6/Myh7/Trem2/Ier3/Ampd3/Myog/Myc/Tspo/Ddit4/Myh3/LOC100362738/Gpi/Gpd1/Pkm/Slc25a25/Ppargc1a	16
BP	GO:0033344	cholesterol efflux	5/501	45/17943	0.0458283	Adipoq/Pparg/Nfkbia/Abcg1/Pltp	5
BP	GO:0035137	hindlimb morphogenesis	5/501	45/17943	0.0458283	Tp63/Pitx2/Tbx3/Zbtb16/Chd7	5
BP	GO:0033137	negative regulation of peptidyl-serine phosphorylation	4/501	29/17943	0.0460481	Ddit4/Rassf2/Pde4d/Nos1	4
BP	GO:0043032	positive regulation of macrophage activation	4/501	29/17943	0.0460481	Trem2/Cebpa/C1qa/Il33	4
BP	GO:0060914	heart formation	4/501	29/17943	0.0460481	Robo2/Tbx1/Eya1/Pim1	4
BP	GO:1904738	vascular associated smooth muscle cell migration	4/501	29/17943	0.0460481	Adipoq/Agt/Igfbp5/Nr4a3	4
BP	GO:1904752	regulation of vascular associated smooth muscle cell migration	4/501	29/17943	0.0460481	Adipoq/Agt/Igfbp5/Nr4a3	4
BP	GO:2000310	regulation of NMDA receptor activity	4/501	29/17943	0.0460481	Ccl2/Ptk2b/Dapk1/Ppargc1a	4
BP	GO:0050764	regulation of phagocytosis	8/501	103/17943	0.046052	Adipoq/C4b/C4a/Ccl2/Pparg/C2/Ptprc/Fcer1g	8
BP	GO:0010906	regulation of glucose metabolic process	9/501	125/17943	0.0472705	Lep/Adipoq/Igfbp5/Dgat2/Rorc/Sorbs1/Irs1/Foxo1/Ppp1r3c	9
BP	GO:0042110	T cell activation	23/501	479/17943	0.0476696	Lep/Cd6/Ccl2/Vtcn1/Dpp4/Egr1/Cxadr/Aif1/Sema4a/Lcp1/Fgl2/Ptprc/Pla2g2d/Fcer1g/Ripk2/RT1-Ba/Rorc/Zmiz1/Smad3/Zc3h12a/Fanca/Zbtb16/Chd7	23
BP	GO:0009150	purine ribonucleotide metabolic process	22/501	452/17943	0.0478885	Myh6/Myh7/Trem2/Ier3/Ampd3/Myog/Fasn/Dgat2/Myc/Prps2/Tspo/Ddit4/Myh3/Nudt4/Pde4b/LOC100362738/Gpi/Gpd1/Pkm/Slc25a25/Pde4d/Ppargc1a	22
BP	GO:0052547	regulation of peptidase activity	22/501	452/17943	0.0478885	Tp63/Slpi/LOC299282/C4b/Serpine1/C4a/Agt/Sfrp2/Pparg/F3/Myc/Cryab/Serpinb1a/Ret/Ripk2/Gpx1/Gpi/Mapk14/Smad3/Vegfa/Wfdc1/Dapk1	22
BP	GO:0010043	response to zinc ion	6/501	64/17943	0.0489195	Gsta4/Kcnk3/Acp5/Tspo/Slc30a3/Mt2A	6
BP	GO:0016101	diterpenoid metabolic process	6/501	64/17943	0.0489195	Rbp4/Cyp1a1/Dgat2/Aldh1a3/Cyp1b1/Rarres2	6
BP	GO:0006813	potassium ion transport	14/501	244/17943	0.0492108	Casq2/Trem2/Slc1a3/Fhl1/Kcnk3/Adrb2/Kcna2/Kcnb1/Ptk2b/Atp1b2/Kcnj12/Slc9a5/Kcnc1/Nos1	14
BP	GO:0002534	cytokine production involved in inflammatory response	5/501	46/17943	0.0492108	Lep/Cd6/Apod/Mapk14/Zc3h12a	5
BP	GO:0046326	positive regulation of glucose import	5/501	46/17943	0.0492108	Adipoq/Klf15/Sorbs1/Mapk14/Irs1	5
BP	GO:0046456	icosanoid biosynthetic process	5/501	46/17943	0.0492108	Hpgds/Pparg/Edn1/Alox5ap/Alox5	5
BP	GO:0071354	cellular response to interleukin-6	5/501	46/17943	0.0492108	Cfi/Ccl2/Cebpa/Aqp4/Ppargc1a	5
BP	GO:0051260	protein homooligomerization	20/501	400/17943	0.0498612	Adipoq/Tp63/Lgi1/Mgst1/Decr1/Slc1a5/Alox5ap/Kcna2/Aldh1a3/Cryab/Aqp4/Fcer1g/Kcnb1/Gpx3/Shmt1/Rxrg/Kcnj12/Pkm/Kcnc1/Gbp1	20
BP	GO:0006855	drug transmembrane transport	7/501	84/17943	0.0498612	Rbp4/Slc36a2/Slc1a3/Agt/Slc1a5/Folr2/Slc38a3	7
BP	GO:0008593	regulation of Notch signaling pathway	7/501	84/17943	0.0498612	Tp63/Bmp7/Robo2/Nfkbia/Zmiz1/Neurl1/Eya1	7
BP	GO:0009201	ribonucleoside triphosphate biosynthetic process	10/501	149/17943	0.0498612	Trem2/Ier3/Myog/Myc/Ddit4/LOC100362738/Gpi/Gpd1/Pkm/Ppargc1a	10
BP	GO:0043255	regulation of carbohydrate biosynthetic process	8/501	105/17943	0.0498612	Lep/Adipoq/Dgat2/Sorbs1/Ptk2b/Irs1/Foxo1/Ppp1r3c	8
BP	GO:0045639	positive regulation of myeloid cell differentiation	8/501	105/17943	0.0498612	Lep/Fos/Tyrobp/Pf4/Ccr1/Jun/Klf10/Mapk14	8
BP	GO:0062014	negative regulation of small molecule metabolic process	8/501	105/17943	0.0498612	Adipoq/Ier3/Myog/Dgat2/Prox1/Tspo/Ddit4/Ppargc1a	8
BP	GO:0001820	serotonin secretion	3/501	16/17943	0.0498612	Crhr2/Maob/Fcer1g	3
BP	GO:0009070	serine family amino acid biosynthetic process	3/501	16/17943	0.0498612	Phgdh/Psat1/Shmt1	3
BP	GO:0014870	response to muscle inactivity	3/501	16/17943	0.0498612	Fbxo32/Myog/Pkm	3
BP	GO:0030730	sequestering of triglyceride	3/501	16/17943	0.0498612	Cidea/Pparg/Lpl	3
BP	GO:0038094	Fc-gamma receptor signaling pathway	3/501	16/17943	0.0498612	Myo1g/Ptprc/Fcer1g	3
BP	GO:0050872	white fat cell differentiation	3/501	16/17943	0.0498612	Scd/Cebpa/Pparg	3
BP	GO:0055119	relaxation of cardiac muscle	3/501	16/17943	0.0498612	Atp2a2/Pde4b/Pde4d	3
BP	GO:0071340	skeletal muscle acetylcholine-gated channel clustering	3/501	16/17943	0.0498612	Fzd9/Colq/Sorbs1	3
BP	GO:0071850	mitotic cell cycle arrest	3/501	16/17943	0.0498612	Cdkn1a/Dusp1/Cdc14a	3
BP	GO:0072074	kidney mesenchyme development	3/501	16/17943	0.0498612	Bmp7/Myc/Six2	3
BP	GO:0090197	positive regulation of chemokine secretion	3/501	16/17943	0.0498612	Aif1/Lpl/Il33	3
BP	GO:0106070	regulation of adenylate cyclase-activating G protein-coupled receptor signaling pathway	3/501	16/17943	0.0498612	Arrdc3/Pde4b/Nos1	3
BP	GO:1901077	regulation of relaxation of muscle	3/501	16/17943	0.0498612	Sln/Pde4b/Pde4d	3
BP	GO:1901722	regulation of cell proliferation involved in kidney development	3/501	16/17943	0.0498612	Bmp7/Egr1/Myc	3
BP	GO:2001028	positive regulation of endothelial cell chemotaxis	3/501	16/17943	0.0498612	Hspb1/Vegfa/Fgf2	3
BP	GO:0010758	regulation of macrophage chemotaxis	4/501	30/17943	0.0498612	Ccl2/Rarres2/Ptk2b/Mapk14	4
BP	GO:0043090	amino acid import	4/501	30/17943	0.0498612	Slc36a2/Slc1a3/Agt/Slc1a5	4
CC	GO:0030016	myofibril	30/495	230/18437	3.5316e-10	Tnnc1/Tnnt1/Tnni1/Myh6/Myl2/Myom3/Myh7/Scn1a/Myoz2/Casq2/Ankrd2/Fhl2/Myh7b/Myl3/Csrp3/Fbxo32/Cryab/Actc1/Ankrd1/Myh3/Pdlim1/Hspb1/Pde4b/Fhl3/Mybpc2/Myom2/Fbp2/Igfn1/Pde4d/Nos1	30
CC	GO:0043292	contractile fiber	30/495	240/18437	5.381e-10	Tnnc1/Tnnt1/Tnni1/Myh6/Myl2/Myom3/Myh7/Scn1a/Myoz2/Casq2/Ankrd2/Fhl2/Myh7b/Myl3/Csrp3/Fbxo32/Cryab/Actc1/Ankrd1/Myh3/Pdlim1/Hspb1/Pde4b/Fhl3/Mybpc2/Myom2/Fbp2/Igfn1/Pde4d/Nos1	30
CC	GO:0030017	sarcomere	27/495	201/18437	8.33043e-10	Tnnc1/Tnnt1/Tnni1/Myh6/Myl2/Myom3/Myh7/Scn1a/Myoz2/Casq2/Ankrd2/Fhl2/Myl3/Csrp3/Fbxo32/Cryab/Actc1/Ankrd1/Pdlim1/Hspb1/Pde4b/Fhl3/Mybpc2/Myom2/Fbp2/Igfn1/Nos1	27
CC	GO:0031674	I band	23/495	146/18437	8.57253e-10	Myh6/Myom3/Myh7/Scn1a/Myoz2/Casq2/Ankrd2/Fhl2/Myl3/Csrp3/Fbxo32/Cryab/Actc1/Ankrd1/Pdlim1/Hspb1/Pde4b/Fhl3/Mybpc2/Myom2/Fbp2/Igfn1/Nos1	23
CC	GO:0044449	contractile fiber part	27/495	214/18437	2.2061e-09	Tnnc1/Tnnt1/Tnni1/Myh6/Myl2/Myom3/Myh7/Scn1a/Myoz2/Casq2/Ankrd2/Fhl2/Myl3/Csrp3/Fbxo32/Cryab/Actc1/Ankrd1/Pdlim1/Hspb1/Pde4b/Fhl3/Mybpc2/Myom2/Fbp2/Igfn1/Nos1	27
CC	GO:0030018	Z disc	19/495	134/18437	2.38093e-07	Myh6/Myom3/Myh7/Scn1a/Myoz2/Casq2/Fhl2/Csrp3/Fbxo32/Cryab/Pdlim1/Hspb1/Pde4b/Fhl3/Mybpc2/Myom2/Fbp2/Igfn1/Nos1	19
CC	GO:0015629	actin cytoskeleton	34/495	483/18437	2.1247e-05	Tnnc1/Tnnt1/Tnni1/Myh6/Myl2/Myom3/Myh7/Tpm3/Myoz2/Myh7b/Myl3/Actr3b/Myo1g/Myh10/Cryab/Hspb7/Actc1/Rnd1/Aif1/Lcp1/Ablim1/Myh3/Pdlim1/Cib2/Sorbs1/Fhl3/Mybpc2/Myom2/Myo19/Gbp1/Anln/Crocc/Dapk1/Cgn	34
CC	GO:0016459	myosin complex	10/495	59/18437	0.000189529	Myh6/Myl2/Myh7/Myh7b/Myl3/Myo1g/Myh10/Myh3/Myo19/Cgn	10
CC	GO:0031672	A band	8/495	45/18437	0.001127	Myl2/Myom3/Fhl2/Myl3/Cryab/Hspb1/Mybpc2/Myom2	8
CC	GO:0005865	striated muscle thin filament	6/495	24/18437	0.00143204	Tnnc1/Tnnt1/Tnni1/Myom3/Mybpc2/Myom2	6
CC	GO:0036379	myofilament	6/495	25/18437	0.00167433	Tnnc1/Tnnt1/Tnni1/Myom3/Mybpc2/Myom2	6
CC	GO:0031012	extracellular matrix	24/495	362/18437	0.00177212	Adamts8/Comp/Mmp27/Chad/Smoc1/Bmp7/Tnfrsf11b/Serpine1/Sfrp2/Colq/Lrrc17/Ccdc80/P3h2/F3/Mmp23/Rarres2/Spon1/Phospho1/Col22a1/Vegfa/Lama3/Col19a1/Adamts9/Lamb3	24
CC	GO:0031430	M band	6/495	26/18437	0.00180025	Myom3/Fhl2/Cryab/Hspb1/Mybpc2/Myom2	6
CC	GO:0043204	perikaryon	15/495	177/18437	0.00279299	Ccl2/Gria2/Crhr2/Kcna2/Cryab/Aif1/Tmem100/Kcnb1/Ctsl/Hspb1/Neurl1/Cacna1a/Map1b/Nos1/Ntsr2	15
CC	GO:0065010	extracellular membrane-bounded organelle	4/495	10/18437	0.00279299	Gbp4/Pf4/Phospho1/Gbp1	4
CC	GO:0032432	actin filament bundle	10/495	94/18437	0.0055654	Myh6/Myh7/Tpm3/Myh10/Cryab/Lcp1/Ablim1/Pdlim1/Sorbs1/Fhl3	10
CC	GO:0005833	hemoglobin complex	4/495	12/18437	0.0055654	Hba-a1/LOC103694855/Hba-a2/Hbb	4
CC	GO:0042641	actomyosin	10/495	96/18437	0.00624163	Myh6/Myh7/Tpm3/Myh10/Actc1/Lcp1/Ablim1/Pdlim1/Sorbs1/Fhl3	10
CC	GO:0032982	myosin filament	4/495	14/18437	0.00957035	Myh6/Myh7/Myh10/Myh3	4
CC	GO:0001725	stress fiber	9/495	85/18437	0.00957035	Myh6/Myh7/Tpm3/Myh10/Lcp1/Ablim1/Pdlim1/Sorbs1/Fhl3	9
CC	GO:0097517	contractile actin filament bundle	9/495	85/18437	0.00957035	Myh6/Myh7/Tpm3/Myh10/Lcp1/Ablim1/Pdlim1/Sorbs1/Fhl3	9
CC	GO:0097440	apical dendrite	5/495	26/18437	0.0110095	Slc7a10/Neurl1/Ptk2b/Map1b/Ppargc1a	5
CC	GO:0001917	photoreceptor inner segment	7/495	54/18437	0.0110095	Cib2/Pkm/Inha/Crocc/Lrrc30/Nos1/Ush1c	7
CC	GO:0044215	other organism	5/495	27/18437	0.0115044	C4b/Gbp4/Pf4/Dynlt1/Gbp1	5
CC	GO:0044216	other organism cell	5/495	27/18437	0.0115044	C4b/Gbp4/Pf4/Dynlt1/Gbp1	5
CC	GO:0044217	other organism part	5/495	27/18437	0.0115044	C4b/Gbp4/Pf4/Dynlt1/Gbp1	5
CC	GO:0005667	transcription factor complex	21/495	371/18437	0.0185506	Pitx2/Fos/Hdac9/Cebpa/Pparg/Dach1/Barx2/Snai3/Ldb2/Tbx3/Ankrd1/Jun/Pdlim1/Max/Smad3/Six2/Arntl/Crem/Nr6a1/Lpin1/Nr4a3	21
CC	GO:0018995	host	4/495	20/18437	0.0269259	Gbp4/Pf4/Dynlt1/Gbp1	4
CC	GO:0043657	host cell	4/495	20/18437	0.0269259	Gbp4/Pf4/Dynlt1/Gbp1	4
CC	GO:0031838	haptoglobin-hemoglobin complex	3/495	10/18437	0.0295418	Hba-a1/Hba-a2/Hbb	3
CC	GO:0044304	main axon	8/495	86/18437	0.0308943	Scn1a/Crhr2/Kcna2/Robo2/Map1b/Kcnc1/Nfasc/Ankrd9	8
CC	GO:0062023	collagen-containing extracellular matrix	14/495	217/18437	0.0312778	Adamts8/Comp/Smoc1/Bmp7/Serpine1/Sfrp2/Colq/Ccdc80/P3h2/F3/Rarres2/Vegfa/Lama3/Lamb3	14
CC	GO:0098858	actin-based cell projection	14/495	221/18437	0.0341267	Ceacam16/Fzd9/Myo1g/Cxadr/Gap43/Actc1/Lcp1/Ctsl/Cib2/Cdc14a/Fgd4/Prom2/Nfasc/Ush1c	14
CC	GO:0030430	host cell cytoplasm	3/495	11/18437	0.0341267	Gbp4/Pf4/Gbp1	3
CC	GO:0033655	host cell cytoplasm part	3/495	11/18437	0.0341267	Gbp4/Pf4/Gbp1	3
MF	GO:0003779	actin binding	33/493	406/16869	9.21854e-05	Tnnc1/Tnni1/Myh6/Myl2/Myom3/Myh7/Tpm3/Myoz2/Myh7b/Myl3/Csrp3/Actr3b/Enc1/Myo1g/Myh10/S100a4/Aif1/Ankrd1/Lcp1/Ablim1/Myh3/Pdlim1/Fhl3/Map1b/Mybpc2/Myom2/Myo19/Fgd4/Gbp1/Anln/Crocc/Mical2/Ush1c	33
MF	GO:0004364	glutathione transferase activity	8/493	36/16869	0.00253594	Mgst1/Gsta4/Gstt1/Hpgds/Gstt3/Gstt2/Alox5ap/Gstm5	8
MF	GO:0004601	peroxidase activity	9/493	50/16869	0.00253594	Mgst1/Gstt1/Gstt2/Alox5ap/Hba-a1/Hba-a2/Gpx3/Hbb/Gpx1	9
MF	GO:0008201	heparin binding	16/493	157/16869	0.00253594	Rspo3/Comp/Lipg/Bmp7/Ccl2/Colq/Pf4/Ccdc80/Grem2/Lpl/Clec3b/Ptprc/Pla2g2d/Hbegf/Vegfa/Fgf2	16
MF	GO:0005125	cytokine activity	17/493	177/16869	0.00253594	Lep/Bmp7/Tnfrsf11b/Ccl2/Pf4/Edn1/Ccl6/Ccl24/Gdf10/Grem2/Il33/Gpi/Ltb/Vegfa/Inha/LOC103694381/Fgf2	17
MF	GO:0004602	glutathione peroxidase activity	6/493	21/16869	0.00253594	Mgst1/Gstt1/Gstt2/Alox5ap/Gpx3/Gpx1	6
MF	GO:0016684	oxidoreductase activity, acting on peroxide as acceptor	9/493	54/16869	0.00253594	Mgst1/Gstt1/Gstt2/Alox5ap/Hba-a1/Hba-a2/Gpx3/Hbb/Gpx1	9
MF	GO:0001228	DNA-binding transcription activator activity, RNA polymerase II-specific	28/493	434/16869	0.00761115	Tp63/Fosb/Pitx2/Fos/Myog/Cebpa/Pparg/Prrx2/Egr1/Barx2/Cebpd/Egr2/Myc/Jun/Klf15/Tbx1/Dbp/Klf10/Myf6/Smad3/Tbx19/Rreb1/Maf/Six2/Lhx2/Arntl/Nr6a1/Nr4a3	28
MF	GO:0048018	receptor ligand activity	28/493	439/16869	0.00820013	Lep/Adipoq/Retn/Bmp7/Tnfrsf11b/Ccl2/Agt/Crhr2/Sfrp2/Pf4/Edn1/Ccl6/Cdc42ep2/Ccl24/Gdf10/Grem2/Il33/Sema4a/Hbegf/Gpi/Ltb/Sema7a/Vegfa/Prom2/Inha/LOC103694381/Ostn/Fgf2	28
MF	GO:0016765	transferase activity, transferring alkyl or aryl (other than methyl) groups	9/493	66/16869	0.00820013	Mgst1/Gsta4/Gstt1/Hpgds/Gstt3/Gstt2/Alox5ap/Gstm5/Fntb	9
MF	GO:0001102	RNA polymerase II activating transcription factor binding	7/493	40/16869	0.00820013	Pitx2/Fos/Egr2/Ldb2/Tbx3/Jun/Smad3	7
MF	GO:0005539	glycosaminoglycan binding	17/493	209/16869	0.00820013	Rspo3/Trem2/Comp/Lipg/Bmp7/Ccl2/Colq/Pf4/Ccdc80/Grem2/Lpl/Clec3b/Ptprc/Pla2g2d/Hbegf/Vegfa/Fgf2	17
MF	GO:1901681	sulfur compound binding	19/493	250/16869	0.00820013	Rspo3/Mgst1/Comp/Lipg/Gsta4/Bmp7/Ccl2/Colq/Pf4/Ccdc80/Grem2/Lpl/Clec3b/Ptprc/Gstm5/Pla2g2d/Hbegf/Vegfa/Fgf2	19
MF	GO:0030545	receptor regulator activity	29/493	474/16869	0.00820013	Lep/Adipoq/Retn/Angpt4/Bmp7/Tnfrsf11b/Ccl2/Agt/Crhr2/Sfrp2/Pf4/Edn1/Ccl6/Cdc42ep2/Ccl24/Gdf10/Grem2/Il33/Sema4a/Hbegf/Gpi/Ltb/Sema7a/Vegfa/Prom2/Inha/LOC103694381/Ostn/Fgf2	29
MF	GO:0000146	microfilament motor activity	5/493	19/16869	0.00857896	Myh6/Myh7/Myh10/Myh3/Myo19	5
MF	GO:0051015	actin filament binding	16/493	201/16869	0.0132714	Tnnc1/Myh6/Myom3/Myh7/Tpm3/Myh7b/Actr3b/Myh10/Aif1/Lcp1/Ablim1/Myh3/Mybpc2/Myom2/Fgd4/Ush1c	16
MF	GO:0042578	phosphoric ester hydrolase activity	23/493	356/16869	0.0141369	Prkar2b/Mpped2/Dusp1/Acp5/Pde3b/Ccr1/Ptprc/Phospho1/Pde4b/Eya4/Ptpn1/Eya1/Dusp4/Cdc14a/Dupd1/Nt5dc3/Nt5c1a/Pfkfb4/Fbp2/Ppp1r3c/Lrrc30/Pde4d/Lpin1	23
MF	GO:0001968	fibronectin binding	6/493	33/16869	0.0141369	Comp/Sfrp2/Igfbp5/Ccdc80/Ctsl/Vegfa	6
MF	GO:0033613	activating transcription factor binding	9/493	77/16869	0.0155366	Pitx2/Fos/Pparg/Egr2/Myc/Ldb2/Tbx3/Jun/Smad3	9
MF	GO:0047498	calcium-dependent phospholipase A2 activity	4/493	13/16869	0.0155366	Pla2g4e/Pla2g2a/Pla2g2d/Pla2g2c	4
MF	GO:0001085	RNA polymerase II transcription factor binding	13/493	151/16869	0.0175624	Ankrd2/Pitx2/Fos/Csrp3/Zfpm2/Pparg/Egr2/Ldb2/Tbx3/Ankrd1/Jun/Smad3/Lpin1	13
MF	GO:0033218	amide binding	23/493	369/16869	0.0184792	Mgst1/Ramp1/Trem2/Gsta4/Cma1/Gria2/Crhr2/Fasn/Dpp4/Adrb2/Pparg/Fzd4/Kdelr3/Cryab/Folr2/Nfkbia/Anpep/RT1-Da/Gstm5/RT1-Ba/Ctsl/Pltp/Fntb	23
MF	GO:0044548	S100 protein binding	4/493	14/16869	0.0184792	Atp2a2/S100b/Kcnk3/S100a6	4
MF	GO:0042277	peptide binding	20/493	302/16869	0.0185872	Mgst1/Ramp1/Trem2/Gsta4/Cma1/Gria2/Crhr2/Dpp4/Adrb2/Pparg/Fzd4/Kdelr3/Cryab/Nfkbia/Anpep/RT1-Da/Gstm5/RT1-Ba/Ctsl/Fntb	20
MF	GO:0005344	oxygen carrier activity	4/493	15/16869	0.0218097	Hba-a1/LOC103694855/Hba-a2/Hbb	4
MF	GO:0016209	antioxidant activity	9/493	84/16869	0.0218097	Mgst1/Gstt1/Gstt2/Alox5ap/Hba-a1/Hba-a2/Gpx3/Hbb/Gpx1	9
MF	GO:0004620	phospholipase activity	9/493	86/16869	0.0249224	Lipg/Pla2g4e/Pla2g2a/Ccr1/Lpl/Pla2g15/Pla2g2d/Ddhd2/Pla2g2c	9
MF	GO:0102567	phospholipase A2 activity (consuming 1,2-dipalmitoylphosphatidylcholine)	4/493	16/16869	0.0254375	Pla2g4e/Pla2g2a/Pla2g2d/Pla2g2c	4
MF	GO:0102568	phospholipase A2 activity consuming 1,2-dioleoylphosphatidylethanolamine)	4/493	16/16869	0.0254375	Pla2g4e/Pla2g2a/Pla2g2d/Pla2g2c	4
MF	GO:0001227	DNA-binding transcription repressor activity, RNA polymerase II-specific	16/493	231/16869	0.0320309	Pitx2/Pparg/Dach1/Snai3/Myc/Prox1/Tbx3/Rorc/Btg2/Max/Mnt/Zbtb5/Nfil3/Foxo1/Zbtb16/En1	16
MF	GO:0003774	motor activity	11/493	129/16869	0.0336232	Myh6/Myh7/Myh7b/Myl3/Dnah5/Myo1g/Myh10/Dynlt1/Myh3/Myo19/Cgn	11
MF	GO:0015179	L-amino acid transmembrane transporter activity	7/493	58/16869	0.0336232	Slc7a10/Slc36a2/Slc1a3/Slc7a15/Slc1a5/Sfxn1/Slc38a3	7
MF	GO:0015175	neutral amino acid transmembrane transporter activity	5/493	30/16869	0.036667	Slc7a10/Slc36a2/Slc1a5/Sfxn1/Slc38a3	5
MF	GO:0004623	phospholipase A2 activity	5/493	31/16869	0.0413002	Pla2g4e/Pla2g2a/Pla2g15/Pla2g2d/Pla2g2c	5
MF	GO:0043395	heparan sulfate proteoglycan binding	4/493	19/16869	0.0413002	Comp/Lpl/Ptprc/Pla2g2d	4
MF	GO:0016298	lipase activity	10/493	115/16869	0.0413002	Ces1d/Lipg/Pla2g4e/Pla2g2a/Ccr1/Lpl/Pla2g15/Pla2g2d/Ddhd2/Pla2g2c	10
MF	GO:0016791	phosphatase activity	17/493	267/16869	0.0458834	Dusp1/Acp5/Ptprc/Phospho1/Eya4/Ptpn1/Eya1/Dusp4/Cdc14a/Dupd1/Nt5dc3/Nt5c1a/Pfkfb4/Fbp2/Ppp1r3c/Lrrc30/Lpin1	17
MF	GO:0043177	organic acid binding	15/493	223/16869	0.0458989	Pck1/Adipoq/Slc1a3/Pygl/Pparg/Alox5ap/P3h2/Folr2/Fmo3/Alas2/Ddah1/Hba-a1/Hba-a2/Hbb/Shmt1	15
MF	GO:0051371	muscle alpha-actinin binding	4/493	20/16869	0.0458989	Myom3/Pdlim1/Mybpc2/Myom2	4
MF	GO:0061629	RNA polymerase II sequence-specific DNA-binding transcription factor binding	3/493	10/16869	0.0475027	Ankrd2/Csrp3/Ankrd1	3

## Sheet: exercise GK.GO
#GO enrichment analysis of differentially expressed genes in the exercise GK vs. GK comparison
ONTOLOGY	ID	Description	GeneRatio	BgRatio	p.adjust	geneID	Count
BP	GO:0060537	muscle tissue development	24/237	474/17943	7.20198e-05	Tp63/Tbx1/Pitx2/Crhr2/Adrb2/Lox/Sorbs2/Meox2/Gja5/Csrp2/Csrp3/Adamts9/Hey2/Pim1/Klhl40/Myf6/Hdac4/Maff/Chd7/Rcan1/Xirp1/Ppargc/Atf3/Ankrd1	24
BP	GO:0055001	muscle cell development	15/237	211/17943	0.000259661	Uchl1/Pitx2/Lox/Sorbs2/Hes1/Csrp2/Flnc/Csrp3/Hey2/Klhl40/Myf6/Hdac4/Rcan1/Xirp1/Comp	15
BP	GO:0055002	striated muscle cell development	14/237	198/17943	0.000289353	Uchl1/Pitx2/Lox/Sorbs2/Csrp2/Flnc/Csrp3/Hey2/Klhl40/Myf6/Hdac4/Rcan1/Xirp1/Comp	14
BP	GO:0072593	reactive oxygen species metabolic process	17/237	294/17943	0.000289353	Cyp1a1/Tlr5/Smpd3/Duox1/Ier3/Gadd45a/Stat3/Hk2/Slc25a33/Zc3h12a/Foxo1/Hsp90aa1/LOC103692716/Ptger4/Pdk4/Hdac4/Nos1	17
BP	GO:1901342	regulation of vasculature development	18/237	338/17943	0.000289353	Ccl24/Cma1/Fbxw7/Crhr2/Adrb2/Sema6a/Meox2/Stat3/Hk2/Zc3h12a/Chi3l1/Hmox1/Adamts9/Hspb1/Hey2/Ptger4/Tnfrsf12a/Runx1	18
BP	GO:0014706	striated muscle tissue development	21/237	451/17943	0.000289353	Tbx1/Pitx2/Crhr2/Adrb2/Lox/Sorbs2/Meox2/Gja5/Csrp3/Adamts9/Hey2/Pim1/Klhl40/Myf6/Hdac4/Maff/Chd7/Rcan1/Xirp1/Atf3/Ankrd1	21
BP	GO:0008015	blood circulation	22/237	493/17943	0.000289353	Atp1a3/Smpd3/Tbxas1/Slc1a1/Apln/Srebf1/Crhr2/Adrb2/Ier3/Gja5/Zc3h12a/Ednrb/Hsp90aa1/Hmox1/Csrp3/Hbegf/Hey2/Hdac4/Chd7/Nos1/Comp/Hspa1a	22
BP	GO:0048844	artery morphogenesis	9/237	76/17943	0.000289353	Tbx1/Gja5/Hes1/Adamts9/Hey2/Ptger4/Chd7/Zmiz1/Comp	9
BP	GO:0001525	angiogenesis	22/237	494/17943	0.000289353	Scg2/Ccl24/Tbx1/Apln/Cma1/Fbxw7/Pitx2/Crhr2/Adrb2/Sema6a/Meox2/Gja5/Stat3/Hk2/Zc3h12a/Chi3l1/Hmox1/Adamts9/Hspb1/Tnfrsf12a/Angptl4/Runx1	22
BP	GO:1903409	reactive oxygen species biosynthetic process	11/237	128/17943	0.000341572	Cyp1a1/Tlr5/Smpd3/Duox1/Stat3/Slc25a33/Zc3h12a/Hsp90aa1/LOC103692716/Hdac4/Nos1	11
BP	GO:0060047	heart contraction	14/237	215/17943	0.000341572	Atp1a3/Slc1a1/Apln/Srebf1/Crhr2/Adrb2/Gja5/Zc3h12a/Hsp90aa1/Csrp3/Hbegf/Hey2/Hdac4/Nos1	14
BP	GO:0008016	regulation of heart contraction	13/237	185/17943	0.000341572	Slc1a1/Apln/Srebf1/Crhr2/Adrb2/Gja5/Zc3h12a/Hsp90aa1/Csrp3/Hbegf/Hey2/Hdac4/Nos1	13
BP	GO:1903522	regulation of blood circulation	15/237	251/17943	0.000367749	Tbxas1/Slc1a1/Apln/Srebf1/Crhr2/Adrb2/Gja5/Zc3h12a/Hsp90aa1/Csrp3/Hbegf/Hey2/Hdac4/Nos1/Hspa1a	15
BP	GO:0003015	heart process	14/237	224/17943	0.000411812	Atp1a3/Slc1a1/Apln/Srebf1/Crhr2/Adrb2/Gja5/Zc3h12a/Hsp90aa1/Csrp3/Hbegf/Hey2/Hdac4/Nos1	14
BP	GO:0060840	artery development	10/237	109/17943	0.000411812	Tbx1/Lox/Gja5/Hes1/Adamts9/Hey2/Ptger4/Chd7/Zmiz1/Comp	10
BP	GO:0051146	striated muscle cell differentiation	17/237	329/17943	0.000411812	Uchl1/Neu2/Tbx1/Pitx2/Lox/Sorbs2/Bhlhe41/Csrp2/Flnc/Csrp3/Hey2/Klhl40/Myf6/Hdac4/Rcan1/Xirp1/Comp	17
BP	GO:0046394	carboxylic acid biosynthetic process	18/237	367/17943	0.000411812	Cyp1a1/Plp1/Aldh1a3/Hpgds/Smpd3/Scd/Tbxas1/Fasn/Ier3/Prkag2/Stat3/Hk2/Abhd2/Ptger4/Pdk4/Hdac4/Pla2g5/Ppargc	18
BP	GO:0042692	muscle cell differentiation	19/237	406/17943	0.000411812	Uchl1/Neu2/Tbx1/Pitx2/Lox/Sorbs2/Bhlhe41/Hes1/Csrp2/Flnc/Ednrb/Csrp3/Hey2/Klhl40/Myf6/Hdac4/Rcan1/Xirp1/Comp	19
BP	GO:0016053	organic acid biosynthetic process	18/237	369/17943	0.000411812	Cyp1a1/Plp1/Aldh1a3/Hpgds/Smpd3/Scd/Tbxas1/Fasn/Ier3/Prkag2/Stat3/Hk2/Abhd2/Ptger4/Pdk4/Hdac4/Pla2g5/Ppargc	18
BP	GO:0072330	monocarboxylic acid biosynthetic process	15/237	263/17943	0.000427067	Cyp1a1/Plp1/Aldh1a3/Hpgds/Scd/Tbxas1/Fasn/Ier3/Prkag2/Stat3/Hk2/Abhd2/Pdk4/Hdac4/Ppargc	15
BP	GO:0003012	muscle system process	19/237	418/17943	0.000526963	Atp1a3/Smpd3/Slc8a3/Adrb2/Sorbs2/Gja5/Zc3h12a/Ednrb/Foxo1/Sln/Hsp90aa1/Csrp3/Hey2/Ptger4/Hdac4/Nr4a3/Nos1/Comp/Ppargc	19
BP	GO:0045765	regulation of angiogenesis	16/237	305/17943	0.000526963	Ccl24/Cma1/Fbxw7/Crhr2/Adrb2/Sema6a/Meox2/Stat3/Hk2/Zc3h12a/Chi3l1/Hmox1/Adamts9/Hspb1/Tnfrsf12a/Runx1	16
BP	GO:2000377	regulation of reactive oxygen species metabolic process	13/237	209/17943	0.000692388	Tlr5/Smpd3/Ier3/Gadd45a/Stat3/Hk2/Slc25a33/Zc3h12a/Foxo1/Hsp90aa1/LOC103692716/Ptger4/Hdac4	13
BP	GO:0071398	cellular response to fatty acid	8/237	72/17943	0.000726812	Srebf1/Hes1/Zc3h12a/Hspb1/Ptger4/Tnc/Pdk4/Ppargc	8
BP	GO:0006839	mitochondrial transport	12/237	185/17943	0.00097541	Srebf1/Fbxw7/Ier3/Stat3/Bid/Hk2/Slc25a33/Hsp90aa1/Bag3/Ucp3/Hspa1b/Hspa1a	12
BP	GO:0070542	response to fatty acid	10/237	128/17943	0.00109574	Scd/Tbxas1/Srebf1/Hes1/Zc3h12a/Hspb1/Ptger4/Tnc/Pdk4/Ppargc	10
BP	GO:0048871	multicellular organismal homeostasis	20/237	489/17943	0.0011253	Aqp4/Abca4/Ldb2/Scd/Tp63/Arrdc3/Apln/Adrb2/Stat3/Col11a2/Ush1c/Ednrb/Sln/Spp1/Lpin1/Ptger4/Pdk4/Nr4a3/Esrrg/Ppargc	20
BP	GO:0010821	regulation of mitochondrion organization	10/237	132/17943	0.00133678	Srebf1/Fbxw7/Ier3/Myo19/Bid/Hk2/Bag3/Ppargc/Hspa1b/Hspa1a	10
BP	GO:0048747	muscle fiber development	8/237	81/17943	0.00141238	Uchl1/Lox/Flnc/Klhl40/Myf6/Hdac4/Rcan1/Comp	8
BP	GO:0007517	muscle organ development	18/237	417/17943	0.00141238	Tbx1/Pitx2/Crhr2/Ky/Adrb2/Lox/Meox2/Csrp3/Hey2/Pim1/Klhl40/Myf6/Hdac4/Maff/Chd7/Rcan1/Atf3/Ankrd1	18
BP	GO:2001236	regulation of extrinsic apoptotic signaling pathway	11/237	165/17943	0.00147768	Scg2/Ret/Fem1b/Bid/Eya4/Hmox1/Tnfrsf12a/Dapk1/Atf3/Hspa1b/Hspa1a	11
BP	GO:0051195	negative regulation of cofactor metabolic process	5/237	24/17943	0.00152876	Ier3/Stat3/Ptger4/Hdac4/Ppargc	5
BP	GO:0071496	cellular response to external stimulus	18/237	425/17943	0.00156738	Tlr5/Srebf1/Gadd45a/Gabarapl1/Hspa5/Zc3h12a/Foxo1/Hmox1/Srd5a1/Pim1/Bag3/Ptger4/Tnc/Pdk4/Hdac4/Nos1/Atf3/Ankrd1	18
BP	GO:0006914	autophagy	17/237	385/17943	0.00156738	Srebf1/Fbxw7/Adrb2/Gabarapl1/Stat3/Bid/Hspb8/Hk2/Zc3h12a/Mtcl1/Foxo1/Hsp90aa1/Hmox1/LOC103692716/Bag3/Dapk1/Ppargc	17
BP	GO:0061919	process utilizing autophagic mechanism	17/237	385/17943	0.00156738	Srebf1/Fbxw7/Adrb2/Gabarapl1/Stat3/Bid/Hspb8/Hk2/Zc3h12a/Mtcl1/Foxo1/Hsp90aa1/Hmox1/LOC103692716/Bag3/Dapk1/Ppargc	17
BP	GO:0009266	response to temperature stimulus	13/237	235/17943	0.00156738	Adrb2/Hspa5/Hspb7/Hsp90aa1/Socs3/Hmox1/LOC103692716/Bag3/Nos1/Ucp3/Ppargc/Hspa1b/Hspa1a	13
BP	GO:0002931	response to ischemia	7/237	62/17943	0.00168616	Uchl1/Bid/Hk2/Hspb1/Rcan1/Ppargc/Hspa1b	7
BP	GO:0045820	negative regulation of glycolytic process	4/237	13/17943	0.00186407	Ier3/Stat3/Hdac4/Ppargc	4
BP	GO:0007519	skeletal muscle tissue development	12/237	207/17943	0.00194129	Tbx1/Pitx2/Crhr2/Adrb2/Meox2/Klhl40/Myf6/Hdac4/Maff/Rcan1/Atf3/Ankrd1	12
BP	GO:0009408	response to heat	10/237	145/17943	0.00212892	Hspa5/Hspb7/Hsp90aa1/Socs3/Hmox1/LOC103692716/Bag3/Nos1/Hspa1b/Hspa1a	10
BP	GO:0045444	fat cell differentiation	13/237	246/17943	0.00222928	Scd/Zfp385a/Srebf1/Adrb2/Hes1/Zc3h12a/Foxo1/Zbtb16/Lpin1/Ccdc3/Noct/Nr4a3/Ppargc	13
BP	GO:0045823	positive regulation of heart contraction	6/237	46/17943	0.00258561	Slc1a1/Apln/Crhr2/Adrb2/Hsp90aa1/Hey2	6
BP	GO:0009612	response to mechanical stimulus	15/237	326/17943	0.00258561	Tlr5/Pkd2l1/Gadd45a/Junb/Chi3l1/Csrp3/Hspb1/Bag3/Ptger4/Tnc/Hdac4/Nos1/Rcan1/Hspa1b/Ankrd1	15
BP	GO:1903524	positive regulation of blood circulation	8/237	94/17943	0.00276837	Tbxas1/Slc1a1/Apln/Crhr2/Adrb2/Gja5/Hsp90aa1/Hey2	8
BP	GO:0060538	skeletal muscle organ development	12/237	219/17943	0.00276837	Tbx1/Pitx2/Crhr2/Adrb2/Meox2/Klhl40/Myf6/Hdac4/Maff/Rcan1/Atf3/Ankrd1	12
BP	GO:0030812	negative regulation of nucleotide catabolic process	4/237	15/17943	0.00276837	Ier3/Stat3/Hdac4/Ppargc	4
BP	GO:0051198	negative regulation of coenzyme metabolic process	4/237	15/17943	0.00276837	Ier3/Stat3/Hdac4/Ppargc	4
BP	GO:0010506	regulation of autophagy	13/237	255/17943	0.00276837	Srebf1/Fbxw7/Adrb2/Stat3/Bid/Hspb8/Hk2/Zc3h12a/Mtcl1/Foxo1/Hmox1/Bag3/Dapk1	13
BP	GO:0006109	regulation of carbohydrate metabolic process	11/237	188/17943	0.00312033	Smpd3/Ier3/Prkag2/Stat3/Foxo1/Srbs1/Midn/Ptger4/Pdk4/Hdac4/Ppargc	11
BP	GO:0014902	myotube differentiation	9/237	125/17943	0.00312033	Neu2/Tbx1/Pitx2/Bhlhe41/Csrp3/Klhl40/Myf6/Hdac4/Rcan1	9
BP	GO:0032570	response to progesterone	7/237	72/17943	0.00327637	Map2/Srebf1/Adrb2/Junb/Socs3/Abhd2/Ptger4	7
BP	GO:0006986	response to unfolded protein	8/237	98/17943	0.00328579	Stc2/Hspa5/Hspb8/Bag3/Comp/Atf3/Hspa1b/Hspa1a	8
BP	GO:0097191	extrinsic apoptotic signaling pathway	12/237	228/17943	0.00368225	Scg2/Ret/Fem1b/Bid/Eya4/Hmox1/Bag3/Tnfrsf12a/Dapk1/Atf3/Hspa1b/Hspa1a	12
BP	GO:0010508	positive regulation of autophagy	9/237	129/17943	0.0036996	Adrb2/Bid/Hspb8/Hk2/Zc3h12a/Foxo1/Hmox1/Bag3/Dapk1	9
BP	GO:0051196	regulation of coenzyme metabolic process	6/237	52/17943	0.00395526	Ier3/Prkag2/Stat3/Pdk4/Hdac4/Ppargc	6
BP	GO:2001170	negative regulation of ATP biosynthetic process	4/237	17/17943	0.00395526	Ier3/Stat3/Hdac4/Ppargc	4
BP	GO:0030808	regulation of nucleotide biosynthetic process	7/237	76/17943	0.00395526	Ier3/Prkag2/Stat3/Pdk4/Hdac4/Nos1/Ppargc	7
BP	GO:0051193	regulation of cofactor metabolic process	7/237	76/17943	0.00395526	Ier3/Prkag2/Stat3/Ptger4/Pdk4/Hdac4/Ppargc	7
BP	GO:1900371	regulation of purine nucleotide biosynthetic process	7/237	76/17943	0.00395526	Ier3/Prkag2/Stat3/Pdk4/Hdac4/Nos1/Ppargc	7
BP	GO:1901653	cellular response to peptide	17/237	432/17943	0.00395526	Atp1a3/Cish/Smpd3/Srebf1/Crhr2/Klf3/Adrb2/Stat3/Slc25a33/Foxo1/Srbs1/Socs3/Csrp3/Srd5a1/Lpin1/Pdk4/Nr4a3	17
BP	GO:0061077	chaperone-mediated protein folding	6/237	53/17943	0.00409263	Hspa5/Fkbp5/Dnajb4/Hspb1/Hspa1b/Hspa1a	6
BP	GO:1900542	regulation of purine nucleotide metabolic process	8/237	104/17943	0.00421501	Ier3/Prkag2/Stat3/Slc25a33/Pdk4/Hdac4/Nos1/Ppargc	8
BP	GO:0043618	regulation of transcription from RNA polymerase II promoter in response to stress	6/237	54/17943	0.00424606	Bach1/Hmox1/Bag3/Atf3/Hspa1b/Hspa1a	6
BP	GO:0045912	negative regulation of carbohydrate metabolic process	6/237	54/17943	0.00424606	Smpd3/Ier3/Stat3/Midn/Hdac4/Ppargc	6
BP	GO:0042310	vasoconstriction	8/237	105/17943	0.00424606	Smpd3/Tbxas1/Apln/Gja5/Ednrb/Nos1/Comp/Hspa1a	8
BP	GO:0034620	cellular response to unfolded protein	7/237	78/17943	0.00424606	Stc2/Hspa5/Hspb8/Bag3/Atf3/Hspa1b/Hspa1a	7
BP	GO:0070555	response to interleukin-1	10/237	168/17943	0.00444847	Aqp4/Smpd3/Ccl24/Hes1/Zc3h12a/Chi3l1/Ptger4/Sele/Hdac4/Ankrd1	10
BP	GO:0035909	aorta morphogenesis	5/237	35/17943	0.00487691	Tbx1/Hes1/Adamts9/Hey2/Chd7	5
BP	GO:0006140	regulation of nucleotide metabolic process	8/237	108/17943	0.00487691	Ier3/Prkag2/Stat3/Slc25a33/Pdk4/Hdac4/Nos1/Ppargc	8
BP	GO:1903426	regulation of reactive oxygen species biosynthetic process	8/237	108/17943	0.00487691	Tlr5/Smpd3/Stat3/Slc25a33/Zc3h12a/Hsp90aa1/LOC103692716/Hdac4	8
BP	GO:0030809	negative regulation of nucleotide biosynthetic process	4/237	19/17943	0.0050107	Ier3/Stat3/Hdac4/Ppargc	4
BP	GO:1900372	negative regulation of purine nucleotide biosynthetic process	4/237	19/17943	0.0050107	Ier3/Stat3/Hdac4/Ppargc	4
BP	GO:0046902	regulation of mitochondrial membrane permeability	6/237	57/17943	0.00517313	Ier3/Stat3/Bid/Hk2/Hspa1b/Hspa1a	6
BP	GO:0062012	regulation of small molecule metabolic process	15/237	366/17943	0.00554751	Smpd3/Srebf1/Ier3/Prkag2/Stat3/Slc25a33/Foxo1/Srbs1/Midn/Ptger4/Pdk4/Hdac4/Nr4a3/Nos1/Ppargc	15
BP	GO:0043620	regulation of DNA-templated transcription in response to stress	6/237	58/17943	0.0055548	Bach1/Hmox1/Bag3/Atf3/Hspa1b/Hspa1a	6
BP	GO:0061323	cell proliferation involved in heart morphogenesis	4/237	20/17943	0.00587244	Tbx1/Pitx2/Hes1/Pim1	4
BP	GO:0044060	regulation of endocrine process	6/237	59/17943	0.00593697	Apln/Crhr2/Cry2/Gja5/Inha/Runx1	6
BP	GO:0006090	pyruvate metabolic process	8/237	113/17943	0.00593697	Ier3/Prkag2/Stat3/Hk2/Pdk4/Hdac4/Nr4a3/Ppargc	8
BP	GO:0097756	negative regulation of blood vessel diameter	8/237	113/17943	0.00593697	Smpd3/Tbxas1/Apln/Gja5/Ednrb/Nos1/Comp/Hspa1a	8
BP	GO:2001233	regulation of apoptotic signaling pathway	16/237	421/17943	0.0072309	Scg2/Tp63/Zfp385a/Fbxw7/Ret/Ier3/Fem1b/Bid/Eya4/Hmox1/Hspb1/Tnfrsf12a/Dapk1/Atf3/Hspa1b/Hspa1a	16
BP	GO:0090257	regulation of muscle system process	12/237	256/17943	0.0072309	Slc8a3/Adrb2/Gja5/Zc3h12a/Foxo1/Sln/Hsp90aa1/Ptger4/Hdac4/Nr4a3/Runx1/Ppargc	12
BP	GO:0006631	fatty acid metabolic process	15/237	379/17943	0.0072959	Plp1/Hpgds/Scd/Tbxas1/Srebf1/Fasn/Acot2/Prkag2/Abhd2/Lpin1/Pdk4/Nr4a3/Ucp3/Ppargc/Crem	15
BP	GO:0010830	regulation of myotube differentiation	6/237	62/17943	0.0072959	Neu2/Tbx1/Bhlhe41/Csrp3/Myf6/Hdac4	6
BP	GO:0051591	response to cAMP	9/237	150/17943	0.00757976	Duox1/Srebf1/Slc8a3/Hspa5/Junb/Srd5a1/Aldh3a1/Pla2g5/Crem	9
BP	GO:0034612	response to tumor necrosis factor	12/237	259/17943	0.00767827	Smpd3/Ccl24/Hes1/Zc3h12a/Chi3l1/Cxcl16/Ccdc3/Hdac4/Ppargc/Hspa1b/Hspa1a/Ankrd1	12
BP	GO:0042594	response to starvation	11/237	222/17943	0.00789459	Srebf1/Gabarapl1/Hspa5/Zc3h12a/Foxo1/Srbs1/Srd5a1/Pdk4/Bdh1/Ppargc/Atf3	11
BP	GO:0014031	mesenchymal cell development	7/237	90/17943	0.00796802	Tbx1/Ret/Pitx2/Sema6a/Hes1/Ednrb/Hey2	7
BP	GO:0001659	temperature homeostasis	10/237	188/17943	0.00846667	Scd/Arrdc3/Apln/Adrb2/Stat3/Ednrb/Sln/Lpin1/Esrrg/Ppargc	10
BP	GO:0035966	response to topologically incorrect protein	8/237	121/17943	0.00846667	Stc2/Hspa5/Hspb8/Bag3/Comp/Atf3/Hspa1b/Hspa1a	8
BP	GO:0009896	positive regulation of catabolic process	16/237	433/17943	0.0088656	Fbxw7/Adrb2/Ier3/Asb5/Bid/Hspb8/Hk2/Zc3h12a/Foxo1/Hsp90aa1/Hmox1/Bag3/Klhl40/Dapk1/Hspa1b/Hspa1a	16
BP	GO:0006110	regulation of glycolytic process	5/237	42/17943	0.0088656	Ier3/Prkag2/Stat3/Hdac4/Ppargc	5
BP	GO:0006936	muscle contraction	13/237	306/17943	0.00901635	Atp1a3/Smpd3/Slc8a3/Adrb2/Gja5/Zc3h12a/Ednrb/Hsp90aa1/Csrp3/Ptger4/Hdac4/Nos1/Comp	13
BP	GO:0035904	aorta development	6/237	66/17943	0.00921055	Tbx1/Lox/Hes1/Adamts9/Hey2/Chd7	6
BP	GO:0030811	regulation of nucleotide catabolic process	5/237	43/17943	0.00960836	Ier3/Prkag2/Stat3/Hdac4/Ppargc	5
BP	GO:0030522	intracellular receptor signaling pathway	11/237	230/17943	0.00968097	Tp63/Tbx1/Srebf1/Cry2/Stat3/Pim1/Nr4a3/Esrrg/Crem/Hspa1b/Hspa1a	11
BP	GO:0060872	semicircular canal development	3/237	10/17943	0.00968097	Tbx1/Nr4a3/Chd7	3
BP	GO:0031649	heat generation	4/237	24/17943	0.00968097	Arrdc3/Apln/Adrb2/Ednrb	4
BP	GO:0071867	response to monoamine	5/237	44/17943	0.0102869	Adrb2/Srd5a1/Nr4a3/Nos1/Ppargc	5
BP	GO:1903320	regulation of protein modification by small protein conjugation or removal	11/237	233/17943	0.010412	Arrdc3/Fbxw7/Adrb2/Fem1b/Hspa5/Zc3h12a/Hsp90aa1/Klhl40/Hdac4/Hspa1b/Hspa1a	11
BP	GO:0071356	cellular response to tumor necrosis factor	11/237	234/17943	0.0106928	Smpd3/Ccl24/Hes1/Zc3h12a/Chi3l1/Ccdc3/Hdac4/Ppargc/Hspa1b/Hspa1a/Ankrd1	11
BP	GO:0051145	smooth muscle cell differentiation	6/237	70/17943	0.0115988	Pitx2/Hes1/Ednrb/Hey2/Rcan1/Comp	6
BP	GO:0090559	regulation of membrane permeability	6/237	70/17943	0.0115988	Ier3/Stat3/Bid/Hk2/Hspa1b/Hspa1a	6
BP	GO:0035967	cellular response to topologically incorrect protein	7/237	99/17943	0.0120147	Stc2/Hspa5/Hspb8/Bag3/Atf3/Hspa1b/Hspa1a	7
BP	GO:0042475	odontogenesis of dentin-containing tooth	7/237	99/17943	0.0120147	Edar/Smpd3/Tp63/Tbx1/Pitx2/Foxo1/Tnc	7
BP	GO:0003263	cardioblast proliferation	3/237	11/17943	0.0121205	Tbx1/Hes1/Pim1	3
BP	GO:0014823	response to activity	8/237	133/17943	0.0133103	Cry2/Slc25a25/Srbs1/Musk/Srd5a1/Nos1/Ucp3/Ppargc	8
BP	GO:0071347	cellular response to interleukin-1	8/237	133/17943	0.0133103	Aqp4/Smpd3/Ccl24/Hes1/Zc3h12a/Chi3l1/Ptger4/Ankrd1	8
BP	GO:0031331	positive regulation of cellular catabolic process	14/237	367/17943	0.0133103	Fbxw7/Adrb2/Bid/Hspb8/Hk2/Zc3h12a/Foxo1/Hsp90aa1/Hmox1/Bag3/Klhl40/Dapk1/Hspa1b/Hspa1a	14
BP	GO:0034605	cellular response to heat	6/237	73/17943	0.0135978	Hspa5/Hsp90aa1/Hmox1/Bag3/Hspa1b/Hspa1a	6
BP	GO:1903579	negative regulation of ATP metabolic process	4/237	27/17943	0.0135978	Ier3/Stat3/Hdac4/Ppargc	4
BP	GO:0010677	negative regulation of cellular carbohydrate metabolic process	5/237	48/17943	0.0135978	Ier3/Stat3/Midn/Hdac4/Ppargc	5
BP	GO:0032868	response to insulin	13/237	326/17943	0.0135978	Cish/Srebf1/Cry2/Slc25a33/Foxo1/Srbs1/Socs3/Csrp3/Srd5a1/Lpin1/Pdk4/Bdh1/Ucp3	13
BP	GO:0006941	striated muscle contraction	9/237	169/17943	0.0136594	Atp1a3/Slc8a3/Adrb2/Gja5/Zc3h12a/Hsp90aa1/Csrp3/Hdac4/Nos1	9
BP	GO:0033002	muscle cell proliferation	11/237	245/17943	0.0138317	Smpd3/Apln/Stat3/Hmox1/Hbegf/Hey2/Pim1/Cnn1/Hdac4/Nr4a3/Ppargc	11
BP	GO:0007006	mitochondrial membrane organization	7/237	103/17943	0.0138317	Ier3/Stat3/Bid/Hk2/Hsp90aa1/Hspa1b/Hspa1a	7
BP	GO:0048483	autonomic nervous system development	5/237	49/17943	0.0141323	Tp63/Tbx1/Ret/Hes1/Ednrb	5
BP	GO:0003264	regulation of cardioblast proliferation	3/237	12/17943	0.0141323	Tbx1/Hes1/Pim1	3
BP	GO:0035296	regulation of tube diameter	9/237	171/17943	0.0141323	Smpd3/Tbxas1/Apln/Adrb2/Gja5/Ednrb/Nos1/Comp/Hspa1a	9
BP	GO:0097746	regulation of blood vessel diameter	9/237	171/17943	0.0141323	Smpd3/Tbxas1/Apln/Adrb2/Gja5/Ednrb/Nos1/Comp/Hspa1a	9
BP	GO:0032637	interleukin-8 production	6/237	75/17943	0.0143341	Tlr5/Fcna/Chi3l1/Ptger4/Hspa1b/Hspa1a	6
BP	GO:0045598	regulation of fat cell differentiation	8/237	137/17943	0.0144471	Zfp385a/Hes1/Zc3h12a/Foxo1/Zbtb16/Lpin1/Ccdc3/Noct	8
BP	GO:0032757	positive regulation of interleukin-8 production	5/237	50/17943	0.0151178	Tlr5/Fcna/Ptger4/Hspa1b/Hspa1a	5
BP	GO:0001666	response to hypoxia	15/237	424/17943	0.0159446	Cyp1a1/Stc2/Slc8a3/Adrb2/Bach1/Acot2/Hk2/Socs3/Hmox1/Aldh3a1/Angptl4/Nos1/Ucp3/Ppargc/Ankrd1	15
BP	GO:0007219	Notch signaling pathway	9/237	175/17943	0.0159446	Tp63/Fbxw7/Sorbs2/Stat3/Hes1/Bcl6/Hey2/Zmiz1/Xirp1	9
BP	GO:1900543	negative regulation of purine nucleotide metabolic process	4/237	29/17943	0.0159446	Ier3/Stat3/Hdac4/Ppargc	4
BP	GO:0097193	intrinsic apoptotic signaling pathway	12/237	295/17943	0.01683	Tp63/Zfp385a/Fbxw7/Ier3/Ppp1r13b/Bid/Zfp385b/Tp53bp2/Hmox1/Hspb1/Hspa1b/Hspa1a	12
BP	GO:0051384	response to glucocorticoid	12/237	297/17943	0.0177225	Rpl32/Aqp4/Crhr2/Adrb2/Junb/Foxo1/Socs3/Srd5a1/Fibin/Aldh3a1/Bdh1/Ucp3	12
BP	GO:0045980	negative regulation of nucleotide metabolic process	4/237	30/17943	0.0177816	Ier3/Stat3/Hdac4/Ppargc	4
BP	GO:0046660	female sex differentiation	9/237	179/17943	0.0181428	Dach1/Tp63/Pitx2/Hspa5/Srd5a1/Inha/Ptger4/Chd7/Runx1	9
BP	GO:0046034	ATP metabolic process	11/237	258/17943	0.0184118	Ier3/Prkag2/Stat3/Bid/Slc25a25/Hk2/Slc25a33/Hdac4/Ppargc/Hspa1b/Hspa1a	11
BP	GO:0035914	skeletal muscle cell differentiation	6/237	80/17943	0.0184118	Tbx1/Klhl40/Myf6/Maff/Atf3/Ankrd1	6
BP	GO:0097755	positive regulation of blood vessel diameter	6/237	80/17943	0.0184118	Apln/Adrb2/Gja5/Ednrb/Nos1/Hspa1a	6
BP	GO:0050880	regulation of blood vessel size	9/237	181/17943	0.0185752	Smpd3/Tbxas1/Apln/Adrb2/Gja5/Ednrb/Nos1/Comp/Hspa1a	9
BP	GO:0042476	odontogenesis	8/237	145/17943	0.0185752	Edar/Smpd3/Tp63/Tbx1/Pitx2/Foxo1/Fmod/Tnc	8
BP	GO:0002026	regulation of the force of heart contraction	4/237	31/17943	0.0185752	Apln/Adrb2/Csrp3/Nos1	4
BP	GO:0030212	hyaluronan metabolic process	4/237	31/17943	0.0185752	Itih3/Smpd3/Pim1/Ptger4	4
BP	GO:0035886	vascular smooth muscle cell differentiation	4/237	31/17943	0.0185752	Pitx2/Hes1/Hey2/Comp	4
BP	GO:0051085	chaperone cofactor-dependent protein refolding	4/237	31/17943	0.0185752	Hspa5/Dnajb4/Hspa1b/Hspa1a	4
BP	GO:0097345	mitochondrial outer membrane permeabilization	4/237	31/17943	0.0185752	Ier3/Bid/Hspa1b/Hspa1a	4
BP	GO:0035150	regulation of tube size	9/237	182/17943	0.0185752	Smpd3/Tbxas1/Apln/Adrb2/Gja5/Ednrb/Nos1/Comp/Hspa1a	9
BP	GO:0010823	negative regulation of mitochondrion organization	5/237	54/17943	0.0185752	Ier3/Bag3/Ppargc/Hspa1b/Hspa1a	5
BP	GO:0043470	regulation of carbohydrate catabolic process	5/237	54/17943	0.0185752	Ier3/Prkag2/Stat3/Hdac4/Ppargc	5
BP	GO:1901654	response to ketone	14/237	391/17943	0.0186741	Rpl32/Map2/Srebf1/Adrb2/Junb/Foxo1/Socs3/Spp1/Srd5a1/Abhd2/Fibin/Ptger4/Tnc/Bdh1	14
BP	GO:0045906	negative regulation of vasoconstriction	3/237	14/17943	0.0186741	Apln/Nos1/Hspa1a	3
BP	GO:0060019	radial glial cell differentiation	3/237	14/17943	0.0186741	Gpr157/Stat3/Hes1	3
BP	GO:1904396	regulation of neuromuscular junction development	3/237	14/17943	0.0186741	Sorbs2/Srbs1/Musk	3
BP	GO:0006809	nitric oxide biosynthetic process	6/237	82/17943	0.0187462	Tlr5/Smpd3/Zc3h12a/Hsp90aa1/LOC103692716/Nos1	6
BP	GO:2000379	positive regulation of reactive oxygen species metabolic process	7/237	113/17943	0.0187462	Tlr5/Smpd3/Gadd45a/Zc3h12a/Hsp90aa1/LOC103692716/Hdac4	7
BP	GO:0045766	positive regulation of angiogenesis	9/237	184/17943	0.0191265	Ccl24/Cma1/Stat3/Hk2/Zc3h12a/Chi3l1/Hmox1/Hspb1/Runx1	9
BP	GO:1902074	response to salt	4/237	32/17943	0.0195032	Hspa5/Zc3h12a/Srbs1/Ptger4	4
BP	GO:0031113	regulation of microtubule polymerization	5/237	56/17943	0.020568	Map2/Tubb4a/Stmn2/Hspa1b/Hspa1a	5
BP	GO:0006096	glycolytic process	6/237	84/17943	0.020568	Ier3/Prkag2/Stat3/Hk2/Hdac4/Ppargc	6
BP	GO:0008593	regulation of Notch signaling pathway	6/237	84/17943	0.020568	Tp63/Stat3/Hes1/Bcl6/Hey2/Zmiz1	6
BP	GO:0014074	response to purine-containing compound	10/237	226/17943	0.0207802	Duox1/Srebf1/Slc8a3/Hspa5/Junb/Srd5a1/Aldh3a1/Pla2g5/Ppargc/Crem	10
BP	GO:0006757	ATP generation from ADP	6/237	85/17943	0.0210932	Ier3/Prkag2/Stat3/Hk2/Hdac4/Ppargc	6
BP	GO:0014032	neural crest cell development	6/237	85/17943	0.0210932	Tbx1/Ret/Pitx2/Sema6a/Hes1/Ednrb	6
BP	GO:0060415	muscle tissue morphogenesis	6/237	85/17943	0.0210932	Tbx1/Pitx2/Hey2/Myf6/Chd7/Ankrd1	6
BP	GO:0031115	negative regulation of microtubule polymerization	3/237	15/17943	0.0210932	Map2/Tubb4a/Stmn2	3
BP	GO:0061684	chaperone-mediated autophagy	3/237	15/17943	0.0210932	Hsp90aa1/LOC103692716/Bag3	3
BP	GO:0097201	negative regulation of transcription from RNA polymerase II promoter in response to stress	3/237	15/17943	0.0210932	Bag3/Hspa1b/Hspa1a	3
BP	GO:0060411	cardiac septum morphogenesis	6/237	86/17943	0.0219828	Tbx1/Pitx2/Gja5/Hes1/Hey2/Chd7	6
BP	GO:1901863	positive regulation of muscle tissue development	6/237	86/17943	0.0219828	Tbx1/Adrb2/Hey2/Pim1/Myf6/Ppargc	6
BP	GO:0007528	neuromuscular junction development	5/237	58/17943	0.0222636	Ky/Sorbs2/Srbs1/Musk/Tnc	5
BP	GO:0001503	ossification	14/237	404/17943	0.0222636	Smpd3/Tp63/Adrb2/Clec11a/Lox/Col11a2/Junb/Fstl3/Zbtb16/Spp1/Ptger4/Noct/Hdac4/Comp	14
BP	GO:0035116	embryonic hindlimb morphogenesis	4/237	34/17943	0.0222636	Tp63/Pitx2/Zbtb16/Chd7	4
BP	GO:1902110	positive regulation of mitochondrial membrane permeability involved in apoptotic process	4/237	34/17943	0.0222636	Ier3/Bid/Hspa1b/Hspa1a	4
BP	GO:1903706	regulation of hemopoiesis	14/237	405/17943	0.0225208	Mafb/Fbxw7/Lox/Stat3/Hes1/Zc3h12a/Bcl6/Fstl3/Zbtb16/Pim1/Runx1/Zmiz1/Hspa1b/Hspa1a	14
BP	GO:0046209	nitric oxide metabolic process	6/237	87/17943	0.0225208	Tlr5/Smpd3/Zc3h12a/Hsp90aa1/LOC103692716/Nos1	6
BP	GO:0036293	response to decreased oxygen levels	15/237	453/17943	0.0228992	Cyp1a1/Stc2/Slc8a3/Adrb2/Bach1/Acot2/Hk2/Socs3/Hmox1/Aldh3a1/Angptl4/Nos1/Ucp3/Ppargc/Ankrd1	15
BP	GO:2001234	negative regulation of apoptotic signaling pathway	10/237	232/17943	0.0229548	Scg2/Zfp385a/Ier3/Bid/Eya4/Hmox1/Hspb1/Dapk1/Hspa1b/Hspa1a	10
BP	GO:0001755	neural crest cell migration	5/237	59/17943	0.0229548	Tbx1/Ret/Pitx2/Sema6a/Ednrb	5
BP	GO:0031669	cellular response to nutrient levels	11/237	274/17943	0.0229548	Srebf1/Gabarapl1/Hspa5/Zc3h12a/Foxo1/Hmox1/Srd5a1/Pim1/Tnc/Pdk4/Atf3	11
BP	GO:0046683	response to organophosphorus	9/237	193/17943	0.0229548	Duox1/Srebf1/Slc8a3/Hspa5/Junb/Srd5a1/Aldh3a1/Pla2g5/Crem	9
BP	GO:0042866	pyruvate biosynthetic process	6/237	88/17943	0.0229548	Ier3/Prkag2/Stat3/Hk2/Hdac4/Ppargc	6
BP	GO:0071375	cellular response to peptide hormone stimulus	13/237	362/17943	0.0229548	Cish/Srebf1/Crhr2/Stat3/Slc25a33/Foxo1/Srbs1/Socs3/Csrp3/Srd5a1/Lpin1/Pdk4/Nr4a3	13
BP	GO:1903707	negative regulation of hemopoiesis	8/237	156/17943	0.023109	Mafb/Fbxw7/Hes1/Zc3h12a/Bcl6/Fstl3/Zbtb16/Runx1	8
BP	GO:0031650	regulation of heat generation	3/237	16/17943	0.023109	Arrdc3/Apln/Ednrb	3
BP	GO:0071340	skeletal muscle acetylcholine-gated channel clustering	3/237	16/17943	0.023109	Sorbs2/Srbs1/Musk	3
BP	GO:0048839	inner ear development	10/237	234/17943	0.0232719	Aldh1a3/Tbx1/Mafb/Hes1/Eya4/Ush1c/Musk/Hey2/Nr4a3/Chd7	10
BP	GO:1903578	regulation of ATP metabolic process	6/237	89/17943	0.0236659	Ier3/Prkag2/Stat3/Slc25a33/Hdac4/Ppargc	6
BP	GO:0031960	response to corticosteroid	12/237	321/17943	0.0243789	Rpl32/Aqp4/Crhr2/Adrb2/Junb/Foxo1/Socs3/Srd5a1/Fibin/Aldh3a1/Bdh1/Ucp3	12
BP	GO:0007005	mitochondrion organization	15/237	460/17943	0.0246274	Srebf1/Fbxw7/Ier3/Myo19/Gabarapl1/Stat3/Bid/Hk2/Slc25a33/Hsp90aa1/Lpin1/Bag3/Ppargc/Hspa1b/Hspa1a	15
BP	GO:0042326	negative regulation of phosphorylation	15/237	460/17943	0.0246274	Uchl1/Ier3/Gadd45a/Sema6a/Prkag2/Stat3/Zc3h12a/Foxo1/Socs3/Midn/Hspb1/Hdac4/Nos1/Ppargc/Atf3	15
BP	GO:1902686	mitochondrial outer membrane permeabilization involved in programmed cell death	4/237	36/17943	0.0247498	Ier3/Bid/Hspa1b/Hspa1a	4
BP	GO:2001169	regulation of ATP biosynthetic process	5/237	61/17943	0.0247498	Ier3/Prkag2/Stat3/Hdac4/Ppargc	5
BP	GO:0010675	regulation of cellular carbohydrate metabolic process	8/237	159/17943	0.0247498	Ier3/Stat3/Foxo1/Srbs1/Midn/Pdk4/Hdac4/Ppargc	8
BP	GO:0062013	positive regulation of small molecule metabolic process	8/237	159/17943	0.0247498	Srebf1/Stat3/Foxo1/Srbs1/Ptger4/Nr4a3/Nos1/Ppargc	8
BP	GO:0048864	stem cell development	6/237	91/17943	0.025193	Tbx1/Ret/Pitx2/Sema6a/Hes1/Ednrb	6
BP	GO:2001057	reactive nitrogen species metabolic process	6/237	91/17943	0.025193	Tlr5/Smpd3/Zc3h12a/Hsp90aa1/LOC103692716/Nos1	6
BP	GO:0043467	regulation of generation of precursor metabolites and energy	7/237	124/17943	0.025193	Ier3/Prkag2/Stat3/Slc25a33/Srbs1/Hdac4/Ppargc	7
BP	GO:0051131	chaperone-mediated protein complex assembly	3/237	17/17943	0.025472	Hsp90aa1/Hspa1b/Hspa1a	3
BP	GO:1903428	positive regulation of reactive oxygen species biosynthetic process	5/237	62/17943	0.025472	Tlr5/Smpd3/Hsp90aa1/LOC103692716/Hdac4	5
BP	GO:0009267	cellular response to starvation	8/237	161/17943	0.025472	Srebf1/Gabarapl1/Hspa5/Zc3h12a/Foxo1/Srd5a1/Pdk4/Atf3	8
BP	GO:0014033	neural crest cell differentiation	6/237	92/17943	0.025472	Tbx1/Ret/Pitx2/Sema6a/Hes1/Ednrb	6
BP	GO:0048644	muscle organ morphogenesis	6/237	92/17943	0.025472	Tbx1/Pitx2/Hey2/Myf6/Chd7/Ankrd1	6
BP	GO:0060021	roof of mouth development	6/237	92/17943	0.025472	Tbx1/Fras1/Meox2/Csrnp1/Col11a2/Chd7	6
BP	GO:0010831	positive regulation of myotube differentiation	4/237	37/17943	0.025472	Neu2/Tbx1/Csrp3/Myf6	4
BP	GO:0060674	placenta blood vessel development	4/237	37/17943	0.025472	Hes1/Junb/Socs3/Hey2	4
BP	GO:0048736	appendage development	9/237	200/17943	0.025472	Tp63/Pitx2/Fras1/Meox2/Gja5/Zbtb16/En1/Chd7/Comp	9
BP	GO:0060173	limb development	9/237	200/17943	0.025472	Tp63/Pitx2/Fras1/Meox2/Gja5/Zbtb16/En1/Chd7/Comp	9
BP	GO:0009205	purine ribonucleoside triphosphate metabolic process	11/237	283/17943	0.025472	Ier3/Prkag2/Stat3/Bid/Slc25a25/Hk2/Slc25a33/Hdac4/Ppargc/Hspa1b/Hspa1a	11
BP	GO:0060541	respiratory system development	11/237	283/17943	0.025472	Aldh1a3/Smpd3/Srebf1/Fbxw7/Pitx2/Lox/Hes1/Fstl3/Chi3l1/Tnc/Chd7	11
BP	GO:0008286	insulin receptor signaling pathway	7/237	126/17943	0.0258683	Cish/Srebf1/Foxo1/Srbs1/Socs3/Csrp3/Pdk4	7
BP	GO:0045600	positive regulation of fat cell differentiation	5/237	63/17943	0.0259799	Zfp385a/Zc3h12a/Zbtb16/Ccdc3/Noct	5
BP	GO:0031110	regulation of microtubule polymerization or depolymerization	6/237	93/17943	0.0259799	Map2/Stmn4/Tubb4a/Stmn2/Hspa1b/Hspa1a	6
BP	GO:0031214	biomineral tissue development	8/237	163/17943	0.0259799	Smpd3/Tbx1/Adrb2/Lox/Foxo1/Spp1/Hey2/Comp	8
BP	GO:1990845	adaptive thermogenesis	8/237	163/17943	0.0259799	Scd/Arrdc3/Adrb2/Sln/Lpin1/Ucp3/Esrrg/Ppargc	8
BP	GO:0071260	cellular response to mechanical stimulus	7/237	127/17943	0.0259799	Tlr5/Gadd45a/Bag3/Ptger4/Hdac4/Nos1/Ankrd1	7
BP	GO:1901216	positive regulation of neuron death	7/237	127/17943	0.0259799	Ptprz1/Fbxw7/Ppp1r13b/Tp53bp2/Musk/Hdac4/Nos1	7
BP	GO:0050878	regulation of body fluid levels	13/237	375/17943	0.0259799	Aqp4/Scd/Tp63/Apln/Zfp385a/Adrb2/Gja5/Hk2/Ednrb/Mmrn1/Ptger4/Selp/Comp	13
BP	GO:0051084	'de novo' posttranslational protein folding	4/237	38/17943	0.0259799	Hspa5/Dnajb4/Hspa1b/Hspa1a	4
BP	GO:0046031	ADP metabolic process	6/237	94/17943	0.0259799	Ier3/Prkag2/Stat3/Hk2/Hdac4/Ppargc	6
BP	GO:0072655	establishment of protein localization to mitochondrion	6/237	94/17943	0.0259799	Srebf1/Fbxw7/Bid/Hk2/Hsp90aa1/Bag3	6
BP	GO:0031396	regulation of protein ubiquitination	9/237	203/17943	0.0259799	Arrdc3/Fbxw7/Adrb2/Fem1b/Hspa5/Hsp90aa1/Klhl40/Hspa1b/Hspa1a	9
BP	GO:1904018	positive regulation of vasculature development	9/237	203/17943	0.0259799	Ccl24/Cma1/Stat3/Hk2/Zc3h12a/Chi3l1/Hmox1/Hspb1/Runx1	9
BP	GO:0032869	cellular response to insulin stimulus	10/237	244/17943	0.0259799	Cish/Srebf1/Slc25a33/Foxo1/Srbs1/Socs3/Csrp3/Srd5a1/Lpin1/Pdk4	10
BP	GO:0000422	autophagy of mitochondrion	5/237	64/17943	0.0259799	Srebf1/Fbxw7/Gabarapl1/Hk2/Ppargc	5
BP	GO:0045776	negative regulation of blood pressure	5/237	64/17943	0.0259799	Apln/Adrb2/Ier3/Gja5/Nos1	5
BP	GO:0060986	endocrine hormone secretion	5/237	64/17943	0.0259799	Apln/Crhr2/Cry2/Inha/Runx1	5
BP	GO:0061726	mitochondrion disassembly	5/237	64/17943	0.0259799	Srebf1/Fbxw7/Gabarapl1/Hk2/Ppargc	5
BP	GO:0007631	feeding behavior	7/237	128/17943	0.0260196	Uchl1/Dach1/Apln/Crhr2/Stat3/En1/Nr4a3	7
BP	GO:0009167	purine ribonucleoside monophosphate metabolic process	11/237	288/17943	0.0266301	Ier3/Prkag2/Stat3/Bid/Slc25a25/Hk2/Slc25a33/Hdac4/Ppargc/Hspa1b/Hspa1a	11
BP	GO:0009126	purine nucleoside monophosphate metabolic process	11/237	289/17943	0.0271244	Ier3/Prkag2/Stat3/Bid/Slc25a25/Hk2/Slc25a33/Hdac4/Ppargc/Hspa1b/Hspa1a	11
BP	GO:0009199	ribonucleoside triphosphate metabolic process	11/237	289/17943	0.0271244	Ier3/Prkag2/Stat3/Bid/Slc25a25/Hk2/Slc25a33/Hdac4/Ppargc/Hspa1b/Hspa1a	11
BP	GO:0006458	'de novo' protein folding	4/237	39/17943	0.0273841	Hspa5/Dnajb4/Hspa1b/Hspa1a	4
BP	GO:0035794	positive regulation of mitochondrial membrane permeability	4/237	39/17943	0.0273841	Ier3/Bid/Hspa1b/Hspa1a	4
BP	GO:0048741	skeletal muscle fiber development	4/237	39/17943	0.0273841	Klhl40/Myf6/Hdac4/Rcan1	4
BP	GO:0045926	negative regulation of growth	11/237	290/17943	0.0273841	Map2/Scd/Stc2/Adrb2/Sema6a/Bcl6/Spp1/Rrad/Hspa1b/Hspa1a/Mt2A	11
BP	GO:0006163	purine nucleotide metabolic process	15/237	476/17943	0.0275126	Fasn/Ier3/Acot2/Prkag2/Stat3/Bid/Slc25a25/Hk2/Slc25a33/Pdk4/Hdac4/Nos1/Ppargc/Hspa1b/Hspa1a	15
BP	GO:0009144	purine nucleoside triphosphate metabolic process	11/237	291/17943	0.0277707	Ier3/Prkag2/Stat3/Bid/Slc25a25/Hk2/Slc25a33/Hdac4/Ppargc/Hspa1b/Hspa1a	11
BP	GO:0044262	cellular carbohydrate metabolic process	11/237	291/17943	0.0277707	Neu2/Ier3/Prkag2/Stat3/Hk2/Foxo1/Srbs1/Midn/Pdk4/Hdac4/Ppargc	11
BP	GO:0070997	neuron death	14/237	429/17943	0.0278675	Ptprz1/Tp63/Fbxw7/Ppp1r13b/Hspa5/Stat3/Tp53bp2/Musk/Hmox1/En1/Hdac4/Nr4a3/Nos1/Ppargc	14
BP	GO:0050795	regulation of behavior	6/237	97/17943	0.0283822	Arrdc3/Crhr2/Stat3/Ptger4/Hdac4/Nr4a3	6
BP	GO:0048511	rhythmic process	13/237	383/17943	0.0283822	Srebf1/Fbxw7/Adrb2/Cry2/Bhlhe41/Gpr157/Hspa5/Srd5a1/Ptger4/Noct/Runx1/Ppargc/Crem	13
BP	GO:0006814	sodium ion transport	9/237	208/17943	0.0285203	Atp1a3/Pkd2l1/Atp1b4/Slc8a3/Adrb2/Fxyd5/Slc38a1/Nos1/Slc4a4	9
BP	GO:1901861	regulation of muscle tissue development	8/237	169/17943	0.0287353	Tbx1/Adrb2/Lox/Hey2/Pim1/Myf6/Hdac4/Ppargc	8
BP	GO:0045747	positive regulation of Notch signaling pathway	4/237	40/17943	0.0287353	Tp63/Stat3/Hes1/Zmiz1	4
BP	GO:0071871	response to epinephrine	3/237	19/17943	0.0287353	Srd5a1/Nos1/Ppargc	3
BP	GO:1903214	regulation of protein targeting to mitochondrion	3/237	19/17943	0.0287353	Srebf1/Fbxw7/Bag3	3
BP	GO:1903909	regulation of receptor clustering	3/237	19/17943	0.0287353	Sorbs2/Srbs1/Musk	3
BP	GO:0003018	vascular process in circulatory system	9/237	209/17943	0.0287353	Smpd3/Tbxas1/Apln/Adrb2/Gja5/Ednrb/Nos1/Comp/Hspa1a	9
BP	GO:0032922	circadian regulation of gene expression	5/237	67/17943	0.0289754	Cry2/Bhlhe41/Noct/Ppargc/Crem	5
BP	GO:1903322	positive regulation of protein modification by small protein conjugation or removal	7/237	133/17943	0.0294661	Arrdc3/Fbxw7/Adrb2/Hspa5/Zc3h12a/Klhl40/Hdac4	7
BP	GO:0046888	negative regulation of hormone secretion	6/237	99/17943	0.0299437	Srebf1/Crhr2/Cry2/Midn/Inha/Nos1	6
BP	GO:0070585	protein localization to mitochondrion	6/237	99/17943	0.0299437	Srebf1/Fbxw7/Bid/Hk2/Hsp90aa1/Bag3	6
BP	GO:2001237	negative regulation of extrinsic apoptotic signaling pathway	6/237	99/17943	0.0299437	Scg2/Eya4/Hmox1/Dapk1/Hspa1b/Hspa1a	6
BP	GO:0032677	regulation of interleukin-8 production	5/237	68/17943	0.0302772	Tlr5/Fcna/Ptger4/Hspa1b/Hspa1a	5
BP	GO:1902108	regulation of mitochondrial membrane permeability involved in apoptotic process	4/237	41/17943	0.0302772	Ier3/Bid/Hspa1b/Hspa1a	4
BP	GO:0048738	cardiac muscle tissue development	10/237	255/17943	0.0314721	Pitx2/Sorbs2/Gja5/Csrp3/Adamts9/Hey2/Pim1/Chd7/Xirp1/Ankrd1	10
BP	GO:0048660	regulation of smooth muscle cell proliferation	8/237	173/17943	0.0314721	Smpd3/Apln/Hmox1/Hbegf/Cnn1/Hdac4/Nr4a3/Ppargc	8
BP	GO:0030540	female genitalia development	3/237	20/17943	0.0314721	Tp63/Srd5a1/Chd7	3
BP	GO:0042573	retinoic acid metabolic process	3/237	20/17943	0.0314721	Cyp1a1/Aldh1a3/Adh6	3
BP	GO:0050665	hydrogen peroxide biosynthetic process	3/237	20/17943	0.0314721	Cyp1a1/Duox1/Stat3	3
BP	GO:2000136	regulation of cell proliferation involved in heart morphogenesis	3/237	20/17943	0.0314721	Tbx1/Hes1/Pim1	3
BP	GO:0042471	ear morphogenesis	7/237	136/17943	0.0314721	Aldh1a3/Tbx1/Mafb/Eya4/Ush1c/Nr4a3/Chd7	7
BP	GO:0009161	ribonucleoside monophosphate metabolic process	11/237	300/17943	0.0314721	Ier3/Prkag2/Stat3/Bid/Slc25a25/Hk2/Slc25a33/Hdac4/Ppargc/Hspa1b/Hspa1a	11
BP	GO:0009135	purine nucleoside diphosphate metabolic process	6/237	101/17943	0.0314721	Ier3/Prkag2/Stat3/Hk2/Hdac4/Ppargc	6
BP	GO:0009179	purine ribonucleoside diphosphate metabolic process	6/237	101/17943	0.0314721	Ier3/Prkag2/Stat3/Hk2/Hdac4/Ppargc	6
BP	GO:0051100	negative regulation of binding	8/237	174/17943	0.0314721	Map2/Fbxw7/Adrb2/Hspa5/Hmox1/Hey2/Arhgap28/Xirp1	8
BP	GO:0071869	response to catecholamine	4/237	42/17943	0.0314721	Srd5a1/Nr4a3/Nos1/Ppargc	4
BP	GO:1905710	positive regulation of membrane permeability	4/237	42/17943	0.0314721	Ier3/Bid/Hspa1b/Hspa1a	4
BP	GO:0007623	circadian rhythm	10/237	257/17943	0.0318093	Srebf1/Fbxw7/Cry2/Bhlhe41/Gpr157/Srd5a1/Ptger4/Noct/Ppargc/Crem	10
BP	GO:0006633	fatty acid biosynthetic process	7/237	137/17943	0.0322047	Plp1/Hpgds/Scd/Tbxas1/Fasn/Abhd2/Pdk4	7
BP	GO:0120162	positive regulation of cold-induced thermogenesis	6/237	102/17943	0.032331	Scd/Adrb2/Sln/Lpin1/Esrrg/Ppargc	6
BP	GO:1902106	negative regulation of leukocyte differentiation	6/237	102/17943	0.032331	Mafb/Fbxw7/Zc3h12a/Bcl6/Fstl3/Runx1	6
BP	GO:0042060	wound healing	14/237	444/17943	0.0333034	Gap43/Duox1/Adrb2/Lox/Mmrn1/Hmox1/Hbegf/Fmod/Ptger4/Tnfrsf12a/Tnc/Myf6/Selp/Comp	14
BP	GO:0014904	myotube cell development	4/237	43/17943	0.0333307	Klhl40/Myf6/Hdac4/Rcan1	4
BP	GO:1903523	negative regulation of blood circulation	4/237	43/17943	0.0333307	Apln/Zc3h12a/Nos1/Hspa1a	4
BP	GO:0006165	nucleoside diphosphate phosphorylation	6/237	103/17943	0.0333307	Ier3/Prkag2/Stat3/Hk2/Hdac4/Ppargc	6
BP	GO:0050886	endocrine process	6/237	103/17943	0.0333307	Apln/Crhr2/Cry2/Gja5/Inha/Runx1	6
BP	GO:1903670	regulation of sprouting angiogenesis	5/237	71/17943	0.0334298	Fbxw7/Sema6a/Meox2/Hmox1/Adamts9	5
BP	GO:0045637	regulation of myeloid cell differentiation	9/237	218/17943	0.0336276	Mafb/Fbxw7/Lox/Stat3/Fstl3/Zbtb16/Runx1/Hspa1b/Hspa1a	9
BP	GO:0014874	response to stimulus involved in regulation of muscle adaptation	3/237	21/17943	0.0336276	Hdac4/Runx1/Ppargc	3
BP	GO:0031065	positive regulation of histone deacetylation	3/237	21/17943	0.0336276	Srebf1/Bcl6/Lpin1	3
BP	GO:1901028	regulation of mitochondrial outer membrane permeabilization involved in apoptotic signaling pathway	3/237	21/17943	0.0336276	Ier3/Hspa1b/Hspa1a	3
BP	GO:1904706	negative regulation of vascular smooth muscle cell proliferation	3/237	21/17943	0.0336276	Apln/Hmox1/Cnn1	3
BP	GO:0043583	ear development	10/237	261/17943	0.0336276	Aldh1a3/Tbx1/Mafb/Hes1/Eya4/Ush1c/Musk/Hey2/Nr4a3/Chd7	10
BP	GO:0009185	ribonucleoside diphosphate metabolic process	6/237	104/17943	0.0336276	Ier3/Prkag2/Stat3/Hk2/Hdac4/Ppargc	6
BP	GO:0019359	nicotinamide nucleotide biosynthetic process	6/237	104/17943	0.0336276	Ier3/Prkag2/Stat3/Hk2/Hdac4/Ppargc	6
BP	GO:0019363	pyridine nucleotide biosynthetic process	6/237	104/17943	0.0336276	Ier3/Prkag2/Stat3/Hk2/Hdac4/Ppargc	6
BP	GO:0016042	lipid catabolic process	11/237	306/17943	0.0336276	Pla2g4e/Neu2/Smpd3/Acot2/Spp1/Srd5a1/Abhd2/Pla2g2a/Lpin1/Pnpla7/Pla2g5	11
BP	GO:0045927	positive regulation of growth	11/237	306/17943	0.0336276	Dcx/Adrb2/Slc25a33/Musk/Hbegf/Hey2/Cxcl16/Pim1/Ptger4/Tnfrsf12a/Chd7	11
BP	GO:0045428	regulation of nitric oxide biosynthetic process	5/237	72/17943	0.0340375	Tlr5/Smpd3/Zc3h12a/Hsp90aa1/LOC103692716	5
BP	GO:0051402	neuron apoptotic process	11/237	307/17943	0.0341822	Ptprz1/Tp63/Fbxw7/Hspa5/Musk/Hmox1/En1/Hdac4/Nr4a3/Nos1/Ppargc	11
BP	GO:0048659	smooth muscle cell proliferation	8/237	179/17943	0.0341822	Smpd3/Apln/Hmox1/Hbegf/Cnn1/Hdac4/Nr4a3/Ppargc	8
BP	GO:0046939	nucleotide phosphorylation	6/237	105/17943	0.0346547	Ier3/Prkag2/Stat3/Hk2/Hdac4/Ppargc	6
BP	GO:0001505	regulation of neurotransmitter levels	13/237	402/17943	0.0352271	Tlr5/Sv2a/Smpd3/Sv2b/Slc1a1/Adrb2/Zc3h12a/Hsp90aa1/LOC103692716/Srd5a1/Ptger4/Slc22a3/Nos1	13
BP	GO:0009409	response to cold	5/237	73/17943	0.0355264	Adrb2/Hsp90aa1/LOC103692716/Ucp3/Ppargc	5
BP	GO:0048638	regulation of developmental growth	13/237	403/17943	0.0357353	Map2/Dcx/Stc2/Adrb2/Sema6a/Stat3/Musk/Spp1/Hey2/Pim1/Ptger4/Tnfrsf12a/Chd7	13
BP	GO:0009150	purine ribonucleotide metabolic process	14/237	452/17943	0.0358748	Fasn/Ier3/Acot2/Prkag2/Stat3/Bid/Slc25a25/Hk2/Slc25a33/Pdk4/Hdac4/Ppargc/Hspa1b/Hspa1a	14
BP	GO:0009141	nucleoside triphosphate metabolic process	11/237	310/17943	0.0358748	Ier3/Prkag2/Stat3/Bid/Slc25a25/Hk2/Slc25a33/Hdac4/Ppargc/Hspa1b/Hspa1a	11
BP	GO:0031668	cellular response to extracellular stimulus	11/237	310/17943	0.0358748	Srebf1/Gabarapl1/Hspa5/Zc3h12a/Foxo1/Hmox1/Srd5a1/Pim1/Tnc/Pdk4/Atf3	11
BP	GO:0035137	hindlimb morphogenesis	4/237	45/17943	0.0361855	Tp63/Pitx2/Zbtb16/Chd7	4
BP	GO:1901626	regulation of postsynaptic membrane organization	3/237	22/17943	0.0362927	Sorbs2/Srbs1/Musk	3
BP	GO:0006626	protein targeting to mitochondrion	5/237	74/17943	0.0368037	Srebf1/Fbxw7/Bid/Hsp90aa1/Bag3	5
BP	GO:0048863	stem cell differentiation	9/237	224/17943	0.037299	Gpm6a/Tp63/Tbx1/Ret/Pitx2/Sema6a/Stat3/Hes1/Ednrb	9
BP	GO:0016052	carbohydrate catabolic process	7/237	144/17943	0.0377033	Neu2/Ier3/Prkag2/Stat3/Hk2/Hdac4/Ppargc	7
BP	GO:1902893	regulation of pri-miRNA transcription by RNA polymerase II	4/237	46/17943	0.0384941	Apln/Srebf1/Stat3/Hdac4	4
BP	GO:0008625	extrinsic apoptotic signaling pathway via death domain receptors	5/237	75/17943	0.0384941	Fem1b/Hmox1/Bag3/Dapk1/Atf3	5
BP	GO:0030326	embryonic limb morphogenesis	7/237	145/17943	0.0386604	Tp63/Pitx2/Fras1/Gja5/Zbtb16/En1/Chd7	7
BP	GO:0035113	embryonic appendage morphogenesis	7/237	145/17943	0.0386604	Tp63/Pitx2/Fras1/Gja5/Zbtb16/En1/Chd7	7
BP	GO:0042136	neurotransmitter biosynthetic process	6/237	109/17943	0.0394092	Tlr5/Smpd3/Zc3h12a/Hsp90aa1/LOC103692716/Nos1	6
BP	GO:0072525	pyridine-containing compound biosynthetic process	6/237	109/17943	0.0394092	Ier3/Prkag2/Stat3/Hk2/Hdac4/Ppargc	6
BP	GO:0046883	regulation of hormone secretion	11/237	316/17943	0.0398425	Apln/Srebf1/Crhr2/Cry2/Midn/Spp1/Inha/Ptger4/Chd7/Runx1/Nos1	11
BP	GO:0043371	negative regulation of CD4-positive, alpha-beta T cell differentiation	3/237	23/17943	0.0398425	Zc3h12a/Bcl6/Runx1	3
BP	GO:0030099	myeloid cell differentiation	13/237	411/17943	0.0398937	Zfp385a/Mafb/Fbxw7/Fasn/Lox/Stat3/Junb/Bcl6/Fstl3/Zbtb16/Runx1/Hspa1b/Hspa1a	13
BP	GO:0001504	neurotransmitter uptake	4/237	47/17943	0.0403714	Sv2b/Slc1a1/Slc22a3/Nos1	4
BP	GO:0045429	positive regulation of nitric oxide biosynthetic process	4/237	47/17943	0.0403714	Tlr5/Smpd3/Hsp90aa1/LOC103692716	4
BP	GO:0042593	glucose homeostasis	11/237	319/17943	0.0421239	Aqp4/Cma1/Crhr2/Cry2/Stat3/Hk2/Foxo1/Csrp3/Ptger4/Pdk4/Ppargc	11
BP	GO:0003007	heart morphogenesis	10/237	274/17943	0.0425264	Tbx1/Pitx2/Gja5/Hes1/Hey2/Pim1/Chd7/Zmiz1/Mical2/Ankrd1	10
BP	GO:0033500	carbohydrate homeostasis	11/237	320/17943	0.0428511	Aqp4/Cma1/Crhr2/Cry2/Stat3/Hk2/Foxo1/Csrp3/Ptger4/Pdk4/Ppargc	11
BP	GO:0002762	negative regulation of myeloid leukocyte differentiation	4/237	48/17943	0.0429417	Mafb/Fbxw7/Fstl3/Runx1	4
BP	GO:0106106	cold-induced thermogenesis	7/237	149/17943	0.0429417	Scd/Arrdc3/Adrb2/Sln/Lpin1/Esrrg/Ppargc	7
BP	GO:0120161	regulation of cold-induced thermogenesis	7/237	149/17943	0.0429417	Scd/Arrdc3/Adrb2/Sln/Lpin1/Esrrg/Ppargc	7
BP	GO:0038034	signal transduction in absence of ligand	5/237	78/17943	0.0429417	Ret/Eya4/Bag3/Hspa1b/Hspa1a	5
BP	GO:0097192	extrinsic apoptotic signaling pathway in absence of ligand	5/237	78/17943	0.0429417	Ret/Eya4/Bag3/Hspa1b/Hspa1a	5
BP	GO:0009123	nucleoside monophosphate metabolic process	11/237	321/17943	0.0429417	Ier3/Prkag2/Stat3/Bid/Slc25a25/Hk2/Slc25a33/Hdac4/Ppargc/Hspa1b/Hspa1a	11
BP	GO:0048661	positive regulation of smooth muscle cell proliferation	6/237	112/17943	0.0429417	Smpd3/Hmox1/Hbegf/Hdac4/Nr4a3/Ppargc	6
BP	GO:0062009	secondary palate development	3/237	24/17943	0.0429806	Tbx1/Col11a2/Chd7	3
BP	GO:0072677	eosinophil migration	3/237	24/17943	0.0429806	Scg2/Ccl24/Ptger4	3
BP	GO:0009259	ribonucleotide metabolic process	14/237	467/17943	0.0433501	Fasn/Ier3/Acot2/Prkag2/Stat3/Bid/Slc25a25/Hk2/Slc25a33/Pdk4/Hdac4/Ppargc/Hspa1b/Hspa1a	14
BP	GO:0046632	alpha-beta T cell differentiation	6/237	113/17943	0.0443031	Stat3/Zc3h12a/Bcl6/Zbtb16/Ptger4/Runx1	6
BP	GO:0072332	intrinsic apoptotic signaling pathway by p53 class mediator	5/237	79/17943	0.0443885	Tp63/Zfp385a/Ppp1r13b/Zfp385b/Tp53bp2	5
BP	GO:0021983	pituitary gland development	4/237	49/17943	0.0443885	Aldh1a3/Pitx2/Hes1/Srd5a1	4
BP	GO:1902041	regulation of extrinsic apoptotic signaling pathway via death domain receptors	4/237	49/17943	0.0443885	Fem1b/Hmox1/Dapk1/Atf3	4
BP	GO:1904407	positive regulation of nitric oxide metabolic process	4/237	49/17943	0.0443885	Tlr5/Smpd3/Hsp90aa1/LOC103692716	4
BP	GO:0034754	cellular hormone metabolic process	6/237	114/17943	0.0452758	Cyp1a1/Aldh1a3/Spp1/Srd5a1/Adh6/Ppargc	6
BP	GO:0042472	inner ear morphogenesis	6/237	114/17943	0.0452758	Aldh1a3/Tbx1/Mafb/Ush1c/Nr4a3/Chd7	6
BP	GO:2000181	negative regulation of blood vessel morphogenesis	6/237	114/17943	0.0452758	Crhr2/Adrb2/Sema6a/Meox2/Adamts9/Ptger4	6
BP	GO:0043367	CD4-positive, alpha-beta T cell differentiation	5/237	80/17943	0.0460709	Stat3/Zc3h12a/Bcl6/Ptger4/Runx1	5
BP	GO:0008209	androgen metabolic process	3/237	25/17943	0.0462043	Spp1/Srd5a1/Ppargc	3
BP	GO:0017000	antibiotic biosynthetic process	3/237	25/17943	0.0462043	Cyp1a1/Duox1/Stat3	3
BP	GO:0035994	response to muscle stretch	3/237	25/17943	0.0462043	Csrp3/Hspb1/Ankrd1	3
BP	GO:0048521	negative regulation of behavior	3/237	25/17943	0.0462043	Arrdc3/Crhr2/Ptger4	3
BP	GO:1903747	regulation of establishment of protein localization to mitochondrion	3/237	25/17943	0.0462043	Srebf1/Fbxw7/Bag3	3
BP	GO:0019229	regulation of vasoconstriction	5/237	81/17943	0.0475751	Tbxas1/Apln/Gja5/Nos1/Hspa1a	5
BP	GO:0046785	microtubule polymerization	5/237	81/17943	0.0475751	Map2/Tubb4a/Stmn2/Hspa1b/Hspa1a	5
BP	GO:0046879	hormone secretion	12/237	376/17943	0.0477589	Smpd3/Apln/Srebf1/Crhr2/Cry2/Midn/Spp1/Inha/Ptger4/Chd7/Runx1/Nos1	12
BP	GO:0071248	cellular response to metal ion	9/237	238/17943	0.0484714	Cyp1a1/Smpd3/Cpne8/Hspa5/Junb/Fstl3/Hmox1/Ppargc/Mt2A	9
BP	GO:0045646	regulation of erythrocyte differentiation	4/237	51/17943	0.0486858	Mafb/Stat3/Hspa1b/Hspa1a	4
BP	GO:0060412	ventricular septum morphogenesis	4/237	51/17943	0.0486858	Pitx2/Gja5/Hes1/Hey2	4
BP	GO:2001239	regulation of extrinsic apoptotic signaling pathway in absence of ligand	4/237	51/17943	0.0486858	Ret/Eya4/Hspa1b/Hspa1a	4
BP	GO:0071229	cellular response to acid chemical	11/237	330/17943	0.0486858	Atp1a3/Tbx1/Srebf1/Ret/Hes1/Zc3h12a/Hspb1/Ptger4/Tnc/Pdk4/Ppargc	11
BP	GO:0021761	limbic system development	7/237	155/17943	0.0486858	Aldh1a3/Dcx/Ptprz1/Pitx2/Crhr2/Srd5a1/Nr4a3	7
BP	GO:0060348	bone development	9/237	239/17943	0.0486858	Smpd3/Zfp385a/Fbxw7/Pitx2/Lox/Srd5a1/Ptger4/Comp/Chad	9
BP	GO:1903531	negative regulation of secretion by cell	9/237	239/17943	0.0486858	Srebf1/Crhr2/Cry2/Zc3h12a/Midn/Hmox1/Inha/Ptger4/Nos1	9
BP	GO:0003151	outflow tract morphogenesis	5/237	82/17943	0.0486858	Tbx1/Pitx2/Gja5/Hes1/Hey2	5
BP	GO:0014829	vascular smooth muscle contraction	3/237	26/17943	0.0496521	Smpd3/Ednrb/Comp	3
BP	GO:0060716	labyrinthine layer blood vessel development	3/237	26/17943	0.0496521	Hes1/Junb/Hey2	3
BP	GO:0042133	neurotransmitter metabolic process	7/237	156/17943	0.0496564	Tlr5/Smpd3/Zc3h12a/Hsp90aa1/LOC103692716/Srd5a1/Nos1	7
CC	GO:0043209	myelin sheath	7/239	65/18437	0.00224463	Atp1a3/Plp1/Tubb4a/Mpz/Hsp90aa1/LOC103692716/Srd5a1	7
CC	GO:0031674	I band	10/239	146/18437	0.00224463	Ky/Csrp2/Flnc/Csrp3/Hspb1/Bag3/Klhl40/Hdac4/Nos1/Ankrd1	10
CC	GO:0031012	extracellular matrix	16/239	362/18437	0.00224463	Adamts8/Ptprz1/Lrrn1/Cilp/Lox/Fras1/Col11a2/Mmrn1/Hsp90aa1/Adamts9/Fmod/Tnc/Runx1/Comp/Chad/Lamc2	16
CC	GO:0030017	sarcomere	11/239	201/18437	0.00510992	Ky/Csrp2/Flnc/Abra/Csrp3/Hspb1/Bag3/Klhl40/Hdac4/Nos1/Ankrd1	11
CC	GO:0044449	contractile fiber part	11/239	214/18437	0.00715393	Ky/Csrp2/Flnc/Abra/Csrp3/Hspb1/Bag3/Klhl40/Hdac4/Nos1/Ankrd1	11
CC	GO:0030016	myofibril	11/239	230/18437	0.0112036	Ky/Csrp2/Flnc/Abra/Csrp3/Hspb1/Bag3/Klhl40/Hdac4/Nos1/Ankrd1	11
CC	GO:0043292	contractile fiber	11/239	240/18437	0.0138414	Ky/Csrp2/Flnc/Abra/Csrp3/Hspb1/Bag3/Klhl40/Hdac4/Nos1/Ankrd1	11
CC	GO:0030018	Z disc	8/239	134/18437	0.0142266	Ky/Csrp2/Flnc/Csrp3/Hspb1/Bag3/Hdac4/Nos1	8
CC	GO:0150034	distal axon	15/239	423/18437	0.0151191	Atp1a3/Gria2/Map2/Gpm6a/Gap43/Stmn4/Stmn2/Sv2a/Dcx/Ptprz1/Sv2b/Rgs10/Crhr2/Hsp90aa1/Nos1	15
CC	GO:0062023	collagen-containing extracellular matrix	10/239	217/18437	0.0173386	Adamts8/Ptprz1/Cilp/Fras1/Hsp90aa1/Fmod/Tnc/Runx1/Comp/Lamc2	10
CC	GO:0044306	neuron projection terminus	10/239	245/18437	0.0397358	Atp1a3/Gria2/Uchl1/Sv2a/Sv2b/Rgs10/Crhr2/Fstl3/Ptger4/Nos1	10
MF	GO:0042826	histone deacetylase binding	9/228	121/16869	0.0206976	Bhlhe41/Hes1/Hsp90aa1/Hey2/Lpin1/Hdac4/Hspa1b/Hspa1a/Ankrd1	9
MF	GO:0044183	protein binding involved in protein folding	4/228	21/16869	0.0379949	Hspa5/Hspb1/Hspa1b/Hspa1a	4
MF	GO:0001085	RNA polymerase II transcription factor binding	9/228	151/16869	0.0379949	Ldb2/Pitx2/Bhlhe41/Stat3/Csrp3/Hey2/Lpin1/Hdac4/Ankrd1	9
MF	GO:0001227	DNA-binding transcription repressor activity, RNA polymerase II-specific	11/228	231/16869	0.0417167	Dach1/Pitx2/Bach1/Bhlhe41/Hes1/Bcl6/Foxo1/Zbtb16/Hey2/En1/Atf3	11
MF	GO:0002039	p53 binding	6/228	72/16869	0.0448493	Tp63/Zfp385a/Ppp1r13b/Zfp385b/Tp53bp2/Ankrd1	6
MF	GO:0047498	calcium-dependent phospholipase A2 activity	3/228	13/16869	0.0487554	Pla2g4e/Pla2g2a/Pla2g5	3
MF	GO:0015081	sodium ion transmembrane transporter activity	8/228	141/16869	0.0487554	Atp1a3/Gria2/Pkd2l1/Slc1a1/Slc8a3/Slc6a17/Slc22a3/Slc4a4	8
MF	GO:0001228	DNA-binding transcription activator activity, RNA polymerase II-specific	15/228	434/16869	0.0487554	Tp63/Tbx1/Mafb/Srebf1/Pitx2/Bach1/Meox2/Stat3/Csrnp1/Tsc22d1/Junb/Myf6/Nr4a3/Runx1/Esrrg	15
MF	GO:0016298	lipase activity	7/228	115/16869	0.0487554	Pla2g4e/Smpd3/Hmox1/Abhd2/Pla2g2a/Pnpla7/Pla2g5	7
MF	GO:0031625	ubiquitin protein ligase binding	12/228	309/16869	0.0487554	Uchl1/Traf5/Fbxw7/Gabarapl1/Hspa5/Bid/Foxo1/Srbs1/Hsp90aa1/Ppargc/Hspa1b/Hspa1a	12
MF	GO:0004620	phospholipase activity	6/228	86/16869	0.0487554	Pla2g4e/Smpd3/Hmox1/Pla2g2a/Pnpla7/Pla2g5	6
MF	GO:0102567	phospholipase A2 activity (consuming 1,2-dipalmitoylphosphatidylcholine)	3/228	16/16869	0.0487554	Pla2g4e/Pla2g2a/Pla2g5	3
MF	GO:0102568	phospholipase A2 activity consuming 1,2-dioleoylphosphatidylethanolamine)	3/228	16/16869	0.0487554	Pla2g4e/Pla2g2a/Pla2g5	3

## Sheet: GK.KEGG
#KEGG pathway enrichment analysis of differentially expressed genes in the GK vs. Wistar comparison
ID	Description	GeneRatio	BgRatio	p.adjust	geneID	Count
rno05416	Viral myocarditis	13/312	96/8845	2.94639e-05	360323/414792/308995/24974/64036/309621/298573/24750/309603/89843/368153/24973/414819	13
rno04612	Antigen processing and presentation	13/312	101/8845	5.08462e-05	360323/414792/24974/309621/24750/299331/103692716/309603/24472/294254/368153/24973/414819	13
rno04510	Focal adhesion	18/312	203/8845	0.00028939	310683/25304/116640/315979/24553/78971/314612/89811/25718/29195/361517/81745/24681/309419/305078/307582/25353/64639	18
rno04940	Type I diabetes mellitus	10/312	80/8845	0.000475326	360323/414792/24974/309621/24750/309603/116660/368153/24973/414819	10
rno04152	AMPK signaling pathway	13/312	127/8845	0.000521051	117276/301518/100911725/54283/78968/25718/360827/81745/360937/50671/29376/114508/25608	13
rno01524	Platinum drug resistance	10/312	82/8845	0.000580369	295037/78971/64352/24842/29487/24426/81745/360243/499689/64639	10
rno03320	PPAR signaling pathway	10/312	82/8845	0.000580369	301517/140868/171142/113976/501283/81745/362850/79131/94172/29171	10
rno05332	Graft-versus-host disease	9/312	71/8845	0.00081827	360323/414792/24974/309621/24750/309603/368153/24973/414819	9
rno00982	Drug metabolism - cytochrome P450	9/312	73/8845	0.00100296	246248/295037/64352/29487/24426/246245/84493/493909/499689	9
rno04218	Cellular senescence	16/312	189/8845	0.0010305	360323/414792/54355/299626/24974/24617/292787/113894/24750/24842/25631/691455/309603/368153/24973/414819	16
rno05330	Allograft rejection	9/312	74/8845	0.00110722	360323/414792/24974/309621/24750/309603/368153/24973/414819	9
rno04512	ECM-receptor interaction	10/312	89/8845	0.00111012	310683/25304/116640/315979/686753/298185/29195/305078/307582/25353	10
rno05225	Hepatocellular carcinoma	15/312	180/8845	0.00171806	299626/24553/295037/314612/64352/25718/24842/29487/24426/64558/25631/24451/24681/499689/64639	15
rno05320	Autoimmune thyroid disease	9/312	81/8845	0.00210762	360323/414792/24974/309621/24750/309603/368153/24973/414819	9
rno04216	Ferroptosis	6/312	41/8845	0.0029112	113976/24842/24451/50567/24268/81639	6
rno04064	NF-kappa B signaling pathway	10/312	102/8845	0.00311011	298006/296872/299626/29469/78971/360640/684173/60350/103694381/361795	10
rno00280	Valine, leucine and isoleucine degradation	7/312	56/8845	0.00333939	64203/29539/171142/25244/29592/65984/493909	7
rno04910	Insulin signaling pathway	12/312	138/8845	0.0034319	301518/78968/314612/689995/309513/114203/81745/691455/50671/29376/114508/64639	12
rno04514	Cell adhesion molecules (CAMs)	14/312	178/8845	0.00410614	360323/414792/308995/24974/309621/499415/360871/24750/84008/24564/309603/368153/24973/414819	14
rno05165	Human papillomavirus infection	23/312	360/8845	0.00419832	360323/414792/310683/25304/116640/315979/24974/155430/29195/24750/24842/64558/170905/59114/309603/286918/305078/307582/25353/368153/64639/24973/414819	23
rno04066	HIF-1 signaling pathway	10/312	107/8845	0.00439697	117276/24617/25718/54702/24499/24533/24451/24681/24334/100911625	10
rno01521	EGFR tyrosine kinase inhibitor resistance	8/312	80/8845	0.00699972	24553/314612/25718/24499/24681/29496/54250/64639	8
rno05418	Fluid shear stress and atherosclerosis	12/312	152/8845	0.00741002	295037/64352/113894/24842/29487/24426/116484/24451/691455/299331/103692716/499689	12
rno00270	Cysteine and methionine metabolism	6/312	51/8845	0.00869236	64203/541589/444984/24533/171347/29592	6
rno04145	Phagosome	14/312	198/8845	0.0102748	360323/414792/25304/24974/309621/24750/498638/60350/309603/29213/368153/688750/24973/414819	14
rno00051	Fructose and mannose metabolism	5/312	39/8845	0.0113843	117276/100911725/54283/114508/286921	5
rno00860	Porphyrin and chlorophyll metabolism	5/312	41/8845	0.0139969	79239/24451/309070/25748/24268	5
rno00980	Metabolism of xenobiotics by cytochrome P450	7/312	74/8845	0.0151569	295037/64352/25315/29487/24426/25426/499689	7
rno00650	Butanoate metabolism	4/312	28/8845	0.0159341	171142/314196/65984/117099	4
rno04974	Protein digestion and absorption	8/312	94/8845	0.0176396	315979/117522/315071/314981/140448/50567/499723/24213	8
rno05144	Malaria	6/312	60/8845	0.0185856	308995/25304/24553/287167/360504/24440	6
rno05204	Chemical carcinogenesis	8/312	95/8845	0.018693	295037/541589/64352/25315/29487/24426/25426/499689	8
rno04710	Circadian rhythm	4/312	30/8845	0.0201889	252917/301518/117095/29657	4
rno05169	Epstein-Barr virus infection	15/312	237/8845	0.0204984	360323/414792/308995/299626/680122/24974/309621/360640/24750/24842/684173/309603/368153/24973/414819	15
rno04151	PI3K-Akt signaling pathway	20/312	349/8845	0.022113	310683/25304/116640/315979/24553/246144/89811/25718/29195/24842/24499/81745/299331/103692716/29496/54250/305078/307582/25353/64639	20
rno05145	Toxoplasmosis	9/312	118/8845	0.0234015	78971/309621/303090/81745/305078/307582/24472/294254/64639	9
rno00760	Nicotinate and nicotinamide metabolism	4/312	32/8845	0.025081	300691/100912521/313574/493909	4
rno00380	Tryptophan metabolism	5/312	48/8845	0.0262229	541589/29539/171142/493909/25426	5
rno05223	Non-small cell lung cancer	6/312	66/8845	0.028346	54355/299626/24842/81745/24681/64639	6
rno00480	Glutathione metabolism	6/312	69/8845	0.0342959	362196/295037/64352/29487/24426/499689	6
rno04931	Insulin resistance	8/312	110/8845	0.0402799	301518/78968/689995/309513/81745/24179/94172/29376	8
rno04964	Proximal tubule bicarbonate reclamation	3/312	22/8845	0.0407593	252919/84484/24213	3
rno05218	Melanoma	6/312	72/8845	0.0409988	299626/24553/25718/24842/54250/64639	6
rno00750	Vitamin B6 metabolism	2/312	10/8845	0.0462886	64533/493909	2
rno04068	FoxO signaling pathway	9/312	134/8845	0.0471826	171043/301518/299626/689161/25718/689954/25631/81745/29376	9
rno05214	Glioma	6/312	75/8845	0.0484767	299626/314612/25718/24842/691455/24681	6

## Sheet: exercise Wistar.KEGG
#KEGG pathway enrichment analysis of differentially expressed genes in the exercise Wistar vs. Wistar comparison
ID	Description	GeneRatio	BgRatio	p.adjust	geneID	Count
rno00980	Metabolism of xenobiotics by cytochrome P450	11/276	74/8845	1.63041e-05	25375/171341/300850/25260/58962/24296/29487/266603/25315/25426/64352	11
rno05410	Hypertrophic cardiomyopathy (HCM)	12/276	88/8845	1.66136e-05	290561/29556/363925/29557/117557/29693/24585/24179/24323/29275/64562/140728	12
rno04910	Insulin signaling pathway	15/276	138/8845	2.45534e-05	362282/24679/64035/50671/29516/64562/686098/24697/64561/114858/25467/114508/84482/309513/83516	15
rno05204	Chemical carcinogenesis	12/276	95/8845	3.64054e-05	25375/171341/300850/25260/58962/24296/29487/266603/25315/25426/116631/64352	12
rno04152	AMPK signaling pathway	14/276	127/8845	3.91663e-05	362282/25608/246253/246074/50671/25664/64562/100911725/54283/25467/114508/84482/83516/360937	14
rno03320	PPAR signaling pathway	11/276	82/8845	4.37802e-05	362282/246253/246074/25629/29171/25664/24539/296371/686098/83574/363331	11
rno04261	Adrenergic signaling in cardiomyocytes	15/276	145/8845	4.4108e-05	290561/29556/363925/29557/117557/29693/24585/24179/24176/29275/25400/24214/81649/140728/25620	15
rno05418	Fluid shear stress and atherosclerosis	15/276	152/8845	7.62314e-05	171341/314322/300850/114553/25260/24770/114856/29487/24323/24516/64352/306330/25697/81649/83785	15
rno00982	Drug metabolism - cytochrome P450	10/276	73/8845	8.13507e-05	25375/171341/300850/25260/58962/29487/266603/84493/25750/64352	10
rno04933	AGE-RAGE signaling pathway in diabetic complications	12/276	103/8845	8.15793e-05	24617/24770/24179/24323/24330/25584/24516/81649/25631/83785/24649/84482	12
rno05216	Thyroid cancer	7/276	37/8845	0.000123027	117557/114851/25664/24577/24716/291005/83574	7
rno04380	Osteoclast differentiation	13/276	129/8845	0.000185553	100360880/63839/301227/314322/114553/25341/361537/25664/25732/360640/25493/24516/81649	13
rno04260	Cardiac muscle contraction	10/276	81/8845	0.000197472	290561/29556/363925/29557/117557/29693/24585/29275/24214/140728	10
rno00480	Glutathione metabolism	9/276	69/8845	0.000270261	171341/300850/25260/58962/29487/81641/64352/64317/24404	9
rno05414	Dilated cardiomyopathy (DCM)	10/276	92/8845	0.000560923	290561/29556/363925/29557/117557/29693/24585/24179/29275/140728	10
rno05323	Rheumatoid arthritis	10/276	93/8845	0.000611554	314322/24770/25732/294269/24516/309621/25697/361795/83785/103694381	10
rno00340	Histidine metabolism	5/276	24/8845	0.000744617	25375/266603/25750/309150/79251	5
rno00590	Arachidonic acid metabolism	9/276	83/8845	0.00107186	296091/58962/29692/25290/298579/64317/24404/29387/290623	9
rno04922	Glucagon signaling pathway	10/276	103/8845	0.00135905	362282/24534/64035/29516/25400/64562/64561/25630/84482/83516	10
rno05202	Transcriptional misregulation in cancer	14/276	184/8845	0.00182256	114851/24252/25664/24577/291005/60661/502935/83574/100909443/305152/54267/84482/353227/58853	14
rno04920	Adipocytokine signaling pathway	8/276	74/8845	0.00205491	362282/25608/246253/25493/64562/83574/25467/83516	8
rno04931	Insulin resistance	10/276	110/8845	0.00223262	362282/64035/24179/25493/64562/24697/25467/84482/309513/83516	10
rno00564	Glycerophospholipid metabolism	9/276	99/8845	0.00366329	296091/311821/29692/361401/298579/287644/60666/29387/313977	9
rno04610	Complement and coagulation cascades	8/276	83/8845	0.00422818	54249/24237/79126/24617/24233/24231/25584/298566	8
rno05321	Inflammatory bowel disease (IBD)	7/276	66/8845	0.00431214	289337/294269/24516/309621/368158/25631/54267	7
rno04964	Proximal tubule bicarbonate reclamation	4/276	22/8845	0.00435233	362282/24214/252919/84484	4
rno04371	Apelin signaling pathway	11/276	141/8845	0.00454451	25629/363925/24585/24617/24330/29516/306330/64562/25631/24598/83516	11
rno04659	Th17 cell differentiation	9/276	109/8845	0.00689399	314322/25493/294269/24516/309621/368158/83574/81649/25631	9
rno00010	Glycolysis / Gluconeogenesis	7/276	72/8845	0.00696572	362282/25375/24534/266603/292804/25630/114508	7
rno00592	alpha-Linolenic acid metabolism	4/276	25/8845	0.00699461	296091/29692/298579/29387	4
rno00260	Glycine, serine and threonine metabolism	5/276	40/8845	0.00767966	58835/293820/25748/25750/287379	5
rno04614	Renin-angiotensin system	5/276	40/8845	0.00767966	25627/24179/54242/100360872/81641	5
rno04975	Fat digestion and absorption	5/276	40/8845	0.00767966	311821/29692/252900/298579/29387	5
rno05219	Bladder cancer	5/276	40/8845	0.00767966	114851/24577/25433/83785/306722	5
rno05140	Leishmaniasis	7/276	75/8845	0.00867487	314322/114553/25493/294269/24516/309621/81649	7
rno04068	FoxO signaling pathway	10/276	134/8845	0.00905351	362282/171043/114851/306330/291005/64562/81649/25631/25467/84482	10
rno04923	Regulation of lipolysis in adipocytes	6/276	58/8845	0.00908338	25629/29171/25360/24176/29516/25467	6
rno05150	Staphylococcus aureus infection	7/276	76/8845	0.00930771	54249/79126/24233/24231/298566/294269/309621	7
rno05222	Small cell lung cancer	8/276	95/8845	0.00946826	114851/24577/25493/291005/60661/83574/307582/305078	8
rno05225	Hepatocellular carcinoma	12/276	180/8845	0.0106251	171341/300850/25260/114851/266608/29487/64558/24577/64352/291005/25631/114858	12
rno05144	Malaria	6/276	60/8845	0.010671	25304/24770/103694857/287167/360504/24440	6
rno04024	cAMP signaling pathway	13/276	210/8845	0.0142979	29693/25360/314322/29627/24176/24323/29516/25493/24516/24626/25400/24214/24627	13
rno05031	Amphetamine addiction	6/276	66/8845	0.0166	100360880/314322/29627/25750/24516/25400	6
rno01230	Biosynthesis of amino acids	7/276	86/8845	0.017615	58835/293820/24689/64203/287379/25630/307759	7
rno05142	Chagas disease (American trypanosomiasis)	8/276	109/8845	0.0204338	314322/24617/24770/298566/25493/24516/81649/25631	8
rno00270	Cysteine and methionine metabolism	5/276	51/8845	0.0208012	81718/24534/58835/293820/64203	5
rno04060	Cytokine-cytokine receptor interaction	15/276	269/8845	0.0212102	25608/296872/85272/25341/24770/360918/287910/29363/288593/79216/57301/361749/361795/24504/103694381	15
rno04926	Relaxin signaling pathway	9/276	132/8845	0.0221781	314322/24323/25493/24516/81649/25631/83785/114858/24598	9
rno04010	MAPK signaling pathway	16/276	300/8845	0.0255576	314322/296091/296269/114856/24577/360640/24516/291005/24471/60661/25398/60587/81649/83785/140728/54250	16
rno04658	Th1 and Th2 cell differentiation	7/276	94/8845	0.0272545	314322/25493/294269/24516/309621/81649/54267	7
rno04912	GnRH signaling pathway	7/276	94/8845	0.0272545	296091/24330/24516/25433/25400/50646/81649	7
rno05133	Pertussis	6/276	74/8845	0.0275859	314322/24233/24231/298566/24516/81649	6
rno05161	Hepatitis B	10/276	160/8845	0.0280489	314322/114851/114090/24577/25493/24516/293624/50646/81649/25631	10
rno00360	Phenylalanine metabolism	3/276	22/8845	0.0298507	25375/266603/25750	3
rno00983	Drug metabolism - other enzymes	7/276	96/8845	0.0301331	113902/171341/300850/25260/29487/116631/64352	7
rno05220	Chronic myeloid leukemia	6/276	79/8845	0.0364476	114851/24577/25493/291005/25631/114858	6
rno04972	Pancreatic secretion	7/276	101/8845	0.0382072	29693/29692/54242/298579/24214/29387/84484	7
rno00591	Linoleic acid metabolism	4/276	42/8845	0.0410483	296091/29692/298579/29387	4
rno04722	Neurotrophin signaling pathway	8/276	125/8845	0.0415595	25493/24516/362491/25400/362418/81649/114858/25467	8
rno01524	Platinum drug resistance	6/276	82/8845	0.0425506	171341/300850/25260/114851/29487/64352	6
rno05224	Breast cancer	9/276	149/8845	0.0434226	314322/114851/266608/64558/24577/24516/291005/114858/54250	9
rno00561	Glycerolipid metabolism	5/276	62/8845	0.0435952	291437/311821/252900/24539/313977	5
rno05143	African trypanosomiasis	4/276	43/8845	0.04419	103694857/287167/360504/24440	4
rno01200	Carbon metabolism	8/276	127/8845	0.0449484	58835/293820/24689/287379/292804/25630/307759/114508	8
rno05230	Central carbon metabolism in cancer	5/276	63/8845	0.0461977	292657/24577/24716/25630/80878	5
rno05226	Gastric cancer	9/276	151/8845	0.046595	114851/266608/64558/24577/291005/83574/25631/114858/54250	9
rno04928	Parathyroid hormone synthesis, secretion and action	7/276	106/8845	0.0475872	314322/114851/24330/25433/24626/83574/24627	7

## Sheet: exercise GK.KEGG
#KEGG pathway enrichment analysis of differentially expressed genes in the exercise GK vs. GK comparison
ID	Description	GeneRatio	BgRatio	p.adjust	geneID	Count
rno04512	ECM-receptor interaction	9/122	89/8845	3.37932e-06	117559/117556/289486/310683/25353/116640/25304/29195/192362	9
rno04910	Insulin signaling pathway	8/122	138/8845	0.000619398	78968/50671/373545/25059/84482/686098/89829/83516	8
rno04371	Apelin signaling pathway	8/122	141/8845	0.000714071	58812/140448/689161/373545/25353/363287/24598/83516	8
rno04152	AMPK signaling pathway	7/122	127/8845	0.00182187	246074/78968/50671/373545/84482/360937/83516	7
rno04974	Protein digestion and absorption	6/122	94/8845	0.00184436	24213/24269/84396/25550/140448/294279	6
rno00564	Glycerophospholipid metabolism	6/122	99/8845	0.00240069	296091/305166/29692/313977/246246/29354	6
rno04972	Pancreatic secretion	6/122	101/8845	0.00265544	24213/24269/84396/29692/29354/84484	6
rno04964	Proximal tubule bicarbonate reclamation	3/122	22/8845	0.00325568	24213/84396/84484	3
rno00980	Metabolism of xenobiotics by cytochrome P450	5/122	74/8845	0.00346911	24296/266603/58962/310903/25375	5
rno04978	Mineral absorption	4/122	46/8845	0.00359543	24213/84396/24451/689415	4
rno04931	Insulin resistance	6/122	110/8845	0.00406037	78968/373545/25125/84482/89829/83516	6
rno00592	alpha-Linolenic acid metabolism	3/122	25/8845	0.00471837	296091/29692/29354	3
rno00590	Arachidonic acid metabolism	5/122	83/8845	0.00566929	296091/58962/24886/29692/29354	5
rno04710	Circadian rhythm	3/122	30/8845	0.00792291	170917/117095/373545	3
rno05204	Chemical carcinogenesis	5/122	95/8845	0.00993248	24296/266603/58962/310903/25375	5
rno04068	FoxO signaling pathway	6/122	134/8845	0.01043	25112/689161/373545/25125/303836/84482	6
rno04915	Estrogen signaling pathway	6/122	134/8845	0.01043	361810/299331/103692716/25433/294254/24472	6
rno04213	Longevity regulating pathway - multiple species	4/122	63/8845	0.0109739	373545/84482/294254/24472	4
rno04612	Antigen processing and presentation	5/122	101/8845	0.012725	25617/299331/103692716/294254/24472	5
rno05221	Acute myeloid leukemia	4/122	66/8845	0.0128668	25125/353227/24649/50662	4
rno05202	Transcriptional misregulation in cancer	7/122	184/8845	0.0135554	114845/25112/303836/84482/353227/58853/50662	7
rno00010	Glycolysis / Gluconeogenesis	4/122	72/8845	0.0172495	266603/25059/310903/25375	4
rno00350	Tyrosine metabolism	3/122	40/8845	0.0174549	266603/310903/25375	3
rno00982	Drug metabolism - cytochrome P450	4/122	73/8845	0.0180599	266603/58962/310903/25375	4
rno04976	Bile secretion	4/122	73/8845	0.0180599	24213/25293/84396/84484	4
rno04920	Adipocytokine signaling pathway	4/122	74/8845	0.0188936	373545/25125/89829/83516	4
rno00591	Linoleic acid metabolism	3/122	42/8845	0.0198837	296091/29692/29354	3
rno04973	Carbohydrate digestion and absorption	3/122	42/8845	0.0198837	24213/84396/25059	3
rno04510	Focal adhesion	7/122	203/8845	0.0220506	362332/310683/25353/116640/25304/29195/192362	7
rno04970	Salivary secretion	4/122	78/8845	0.0224657	24213/84396/24176/24598	4
rno04217	Necroptosis	6/122	161/8845	0.0237584	296091/684173/25125/64625/299331/103692716	6
rno00565	Ether lipid metabolism	3/122	47/8845	0.0267308	296091/29692/29354	3
rno05165	Human papillomavirus infection	10/122	360/8845	0.0267651	29577/310683/84482/25353/155430/84023/116640/25304/29195/192362	10
rno00360	Phenylalanine metabolism	2/122	22/8845	0.0364151	266603/25375	2
rno04913	Ovarian steroidogenesis	3/122	55/8845	0.0399753	296091/24296/192272	3
rno05014	Amyotrophic lateral sclerosis (ALS)	3/122	56/8845	0.0418258	29627/64625/24598	3
rno00340	Histidine metabolism	2/122	24/8845	0.0427426	266603/25375	2
rno05134	Legionellosis	3/122	58/8845	0.0456542	289337/294254/24472	3
rno05144	Malaria	3/122	60/8845	0.0496505	25544/25651/25304	3
