# Supplementary material for: Transcriptomic Responses of Skeletal Muscle to Acute Exercise in Diabetic Goto-Kakizaki Rats
Source: Front Physiol. 2019 Jul 9;10:872. doi: 10.3389/fphys.2019.00872 (PMC6629899; doi:10.3389/fphys.2019.00872)
Supplement: TABLE S4 — Three clusters of DEGs and related KEGG pathway enrichment analysis. [file Table_4.XLSX]

## Sheet: exercise GK.gene.3cluster
#Three Clusters of differentially expressed genes in the exercise GK rats
Ensembl ID	Gene	fit.cluster
ENSRNOG00000010731	Gpm6a	1
ENSRNOG00000029543	Cish	1
ENSRNOG00000008834	Dach1	1
ENSRNOG00000016945	Pla2g2a	1
ENSRNOG00000011705	Stmn2	1
ENSRNOG00000054204	Gria2	1
ENSRNOG00000002343	Uchl1	1
ENSRNOG00000057517	Rn60_X_0772.2	1
ENSRNOG00000011841	Map2	1
ENSRNOG00000049530	AABR07012054.1	1
ENSRNOG00000012591	Pkd2l1	1
ENSRNOG00000011145	Crhr2	1
ENSRNOG00000004882	Capn6	1
ENSRNOG00000053391	Rn50_18_0774.2	1
ENSRNOG00000030475	Mum1l1	1
ENSRNOG00000014751	Ret	1
ENSRNOG00000020729	Stc2	1
ENSRNOG00000002917	Sec14l5	1
ENSRNOG00000006583	Hpgds	1
ENSRNOG00000002163	Klf3	1
ENSRNOG00000017063	Fcna	1
ENSRNOG00000053334	Stmn4	1
ENSRNOG00000047505	Tubb4a	1
ENSRNOG00000016043	Aqp4	1
ENSRNOG00000015055	Scg2	1
ENSRNOG00000006802	Lrrn1	1
ENSRNOG00000032133	Rnase2	1
ENSRNOG00000028690	LOC100362366	1
ENSRNOG00000016962	Neu2	1
ENSRNOG00000042592	Rgs10	1
ENSRNOG00000019500	Cyp1a1	1
ENSRNOG00000000605	Hs3st5	1
ENSRNOG00000019217	Adrb2	1
ENSRNOG00000010725	Cpa1	1
ENSRNOG00000047712	Dcx	1
ENSRNOG00000010681	Pitx2	1
ENSRNOG00000024904	Pla2g4e	1
ENSRNOG00000031127	LOC100361838	1
ENSRNOG00000001528	Gap43	1
ENSRNOG00000006956	Adamtsl1	1
ENSRNOG00000001924	Tp63	1
ENSRNOG00000013552	Scd	1
ENSRNOG00000003496	Tbc1d9	1
ENSRNOG00000052389	AABR07031489.1	1
ENSRNOG00000007808	Nap1l5	1
ENSRNOG00000047957	Traf5	1
ENSRNOG00000002419	Plp1	1
ENSRNOG00000005574	Adamts8	1
ENSRNOG00000032605	Rpl32	1
ENSRNOG00000018895	Mchr1	1
ENSRNOG00000002305	Slc15a2	1
ENSRNOG00000012892	Abca4	1
ENSRNOG00000026302	Lrrn4cl	1
ENSRNOG00000045885	LOC100365810	1
ENSRNOG00000020563	Cma1	1
ENSRNOG00000059827	LOC691995	1
ENSRNOG00000021182	Sv2a	1
ENSRNOG00000045649	Arrdc3	1
ENSRNOG00000010047	Ddit4l	1
ENSRNOG00000007561	Glb1l2	1
ENSRNOG00000007059	Atp1b4	1
ENSRNOG00000009045	Alg6	1
ENSRNOG00000000827	Ier3	1
ENSRNOG00000000257	Smpd3	1
ENSRNOG00000008210	Ky	1
ENSRNOG00000017689	Itih3	1
ENSRNOG00000028598	Edar	1
ENSRNOG00000029871	Slc8a3	1
ENSRNOG00000023352	Fam78a	1
ENSRNOG00000031515	Klra2	1
ENSRNOG00000045636	Fasn	1
ENSRNOG00000052070	Aldh1a3	1
ENSRNOG00000033397	Adamts20	1
ENSRNOG00000003205	Ldb2	1
ENSRNOG00000007918	Tbxas1	1
ENSRNOG00000005669	Car8	1
ENSRNOG00000015264	Lrrc38	1
ENSRNOG00000007625	B3galt1	1
ENSRNOG00000016037	Mafb	1
ENSRNOG00000033348	Duox1	1
ENSRNOG00000036833	Zfp385a	1
ENSRNOG00000010889	Fbxw7	1
ENSRNOG00000014816	Slc1a1	1
ENSRNOG00000022067	Tlr5	1
ENSRNOG00000049388	Prr32	1
ENSRNOG00000011160	Sv2b	1
ENSRNOG00000001892	Tbx1	1
ENSRNOG00000006030	Ptprz1	1
ENSRNOG00000015691	Fam212b	1
ENSRNOG00000015718	RGD1307461	1
ENSRNOG00000031162	Ccl24	1
ENSRNOG00000029911	Cilp	1
ENSRNOG00000003984	Apln	1
ENSRNOG00000004645	Galnt5	1
ENSRNOG00000020263	Atp1a3	1
ENSRNOG00000009153	Cidec	1
ENSRNOG00000001843	Bcl6	2
ENSRNOG00000011094	Efcab6	2
ENSRNOG00000011704	Fbxo34	2
ENSRNOG00000004699	Fibin	2
ENSRNOG00000057514	AABR07015080.1	2
ENSRNOG00000021149	Ush1c	2
ENSRNOG00000018143	Hpdl	2
ENSRNOG00000020372	Hdac4	2
ENSRNOG00000019179	Ggta1	2
ENSRNOG00000015902	Cpxm2	2
ENSRNOG00000006972	Zfp189	2
ENSRNOG00000000463	Col11a2	2
ENSRNOG00000004377	Lpin1	2
ENSRNOG00000006588	Meox2	2
ENSRNOG00000042838	Junb	2
ENSRNOG00000017065	Arhgap28	2
ENSRNOG00000027271	RGD1359290	2
ENSRNOG00000027731	Ubxn10	2
ENSRNOG00000004033	Sema6a	2
ENSRNOG00000018198	Dapk1	2
ENSRNOG00000055956	AABR07015078.1	2
ENSRNOG00000012653	Ppp1r13b	2
ENSRNOG00000001582	Bach1	2
ENSRNOG00000013397	Foxo1	2
ENSRNOG00000022523	Fkbp5	2
ENSRNOG00000058862	AABR07051308.1	2
ENSRNOG00000011521	Filip1	2
ENSRNOG00000008190	Pnpla7	2
ENSRNOG00000029980	Zbtb16	2
ENSRNOG00000017716	Ucp3	2
ENSRNOG00000020622	Cilp2	2
ENSRNOG00000046600	AABR07015066.1	2
ENSRNOG00000024986	Mmrn1	2
ENSRNOG00000054945	LOC257642	2
ENSRNOG00000049054	Ntsr2	2
ENSRNOG00000017766	Car12	2
ENSRNOG00000006689	Chd7	2
ENSRNOG00000056580	En1	2
ENSRNOG00000000529	Pim1	2
ENSRNOG00000057811	AABR07015055.2	2
ENSRNOG00000012184	Urgcp	2
ENSRNOG00000013240	Ptger4	2
ENSRNOG00000002852	Myo19	2
ENSRNOG00000019138	Clec11a	2
ENSRNOG00000052758	Fam49a	2
ENSRNOG00000016627	Eya4	2
ENSRNOG00000024602	Plekha7	2
ENSRNOG00000052493	AABR07068327.1	2
ENSRNOG00000046081	AABR07015079.1	2
ENSRNOG00000010799	Noct	2
ENSRNOG00000016244	Mical2	2
ENSRNOG00000052998	AABR07048791.1	2
ENSRNOG00000048961	Bhlhe41	2
ENSRNOG00000021217	Itga10	2
ENSRNOG00000031333	AY172581.10	2
ENSRNOG00000003463	Srebf1	2
ENSRNOG00000007999	Abra	2
ENSRNOG00000020097	Inha	2
ENSRNOG00000030700	Mt-cox3	2
ENSRNOG00000060657	AABR07000404.1	2
ENSRNOG00000003183	Fmod	2
ENSRNOG00000058645	Tnc	2
ENSRNOG00000003237	Tp53bp2	2
ENSRNOG00000060518	LOC257642	2
ENSRNOG00000060896	AABR07063424.1	2
ENSRNOG00000033567	Musk	2
ENSRNOG00000010488	Zmiz1	2
ENSRNOG00000055323	AABR07063421.1	2
ENSRNOG00000059467	AABR07033564.2	2
ENSRNOG00000026128	Cpne8	2
ENSRNOG00000001130	Nos1	2
ENSRNOG00000055836	AABR07000402.1	2
ENSRNOG00000053362	Gabarapl1	2
ENSRNOG00000002180	Tbc1d1	2
ENSRNOG00000004878	Myf6	3
ENSRNOG00000016949	Slc25a33	3
ENSRNOG00000014117	Hmox1	3
ENSRNOG00000009311	Fstl3	3
ENSRNOG00000033653	Mpp3	3
ENSRNOG00000014327	Csrp3	3
ENSRNOG00000003772	Csrp2	3
ENSRNOG00000015434	Midn	3
ENSRNOG00000026965	Tmem140	3
ENSRNOG00000009005	Slco2a1	3
ENSRNOG00000001736	Bdh1	3
ENSRNOG00000013364	Hey2	3
ENSRNOG00000022946	Slc22a3	3
ENSRNOG00000030478	AY172581.9	3
ENSRNOG00000002667	Lamc2	3
ENSRNOG00000010997	Ednrb	3
ENSRNOG00000043098	Mt2A	3
ENSRNOG00000009085	Prkag2	3
ENSRNOG00000009589	LOC102552055	3
ENSRNOG00000002331	Aldh3a1	3
ENSRNOG00000012886	Maff	3
ENSRNOG00000010134	Acot2	3
ENSRNOG00000003745	Atf3	3
ENSRNOG00000017933	Ccdc3	3
ENSRNOG00000026647	Cxcl16	3
ENSRNOG00000007281	Flnc	3
ENSRNOG00000027736	Cnn1	3
ENSRNOG00000033433	Csrnp1	3
ENSRNOG00000055564	RGD1564664	3
ENSRNOG00000002208	Shroom3	3
ENSRNOG00000005964	Nr4a3	3
ENSRNOG00000003546	Tnfrsf12a	3
ENSRNOG00000029401	Actg2	3
ENSRNOG00000037085	Xirp1	3
ENSRNOG00000013391	Sorbs2	3
ENSRNOG00000010478	LOC299282	3
ENSRNOG00000019504	Adprhl1	3
ENSRNOG00000014900	Crem	3
ENSRNOG00000017484	Gja5	3
ENSRNOG00000026793	Nt5dc3	3
ENSRNOG00000047876	LOC689986	3
ENSRNOG00000002946	Socs3	3
ENSRNOG00000020298	Bag3	3
ENSRNOG00000050647	Hspa1b	3
ENSRNOG00000042630	Asb5	3
ENSRNOG00000015658	Sorbs1	3
ENSRNOG00000005615	Gadd45a	3
ENSRNOG00000059714	Hsp90aa1	3
ENSRNOG00000023546	Hspb1	3
ENSRNOG00000019390	Klhl40	3
ENSRNOG00000024479	Klhl34	3
ENSRNOG00000019742	Stat3	3
ENSRNOG00000002723	Sele	3
ENSRNOG00000003134	Slc4a4	3
ENSRNOG00000003304	Chad	3
ENSRNOG00000043451	Spp1	3
ENSRNOG00000001030	Tsc22d1	3
ENSRNOG00000027089	Ell2	3
ENSRNOG00000002593	Esrrg	3
ENSRNOG00000017120	Abhd2	3
ENSRNOG00000005291	Slc38a1	3
ENSRNOG00000001720	Hes1	3
ENSRNOG00000007219	LOC103692716	3
ENSRNOG00000030721	Fbrsl1	3
ENSRNOG00000004659	Creld2	3
ENSRNOG00000001979	Rcan1	3
ENSRNOG00000031934	Enah	3
ENSRNOG00000021062	Fxyd5	3
ENSRNOG00000002794	Selp	3
ENSRNOG00000029079	Hspb7	3
ENSRNOG00000009047	Sln	3
ENSRNOG00000022760	RGD1304929	3
ENSRNOG00000022762	Mettl21cl1	3
ENSRNOG00000014426	Lox	3
ENSRNOG00000053706	Lonrf1	3
ENSRNOG00000025764	AC128848.1	3
ENSRNOG00000001193	Hsf2bp	3
ENSRNOG00000017601	Srd5a1	3
ENSRNOG00000022392	Hspb8	3
ENSRNOG00000015195	Hdhd3	3
ENSRNOG00000050090	Slc6a17	3
ENSRNOG00000018646	Hbegf	3
ENSRNOG00000006116	Hk2	3
ENSRNOG00000005176	Map7d2	3
ENSRNOG00000007478	Cry2	3
ENSRNOG00000014338	Slc25a25	3
ENSRNOG00000009131	Zc3h12a	3
ENSRNOG00000019202	PVR	3
ENSRNOG00000018294	Hspa5	3
ENSRNOG00000019656	Btd	3
ENSRNOG00000025527	Mtcl1	3
ENSRNOG00000023257	Adamts9	3
ENSRNOG00000003171	Mpz	3
ENSRNOG00000001704	Runx1	3
ENSRNOG00000002053	Fras1	3
ENSRNOG00000009565	Pdk4	3
ENSRNOG00000053272	Chi3l1	3
ENSRNOG00000062170	Pvt1	3
ENSRNOG00000025670	Shisa3	3
ENSRNOG00000013011	Dnajb4	3
ENSRNOG00000002159	Gpat3	3
ENSRNOG00000004473	Ppargc1a	3
ENSRNOG00000005883	Nek10	3
ENSRNOG00000012436	Adh6	3
ENSRNOG00000012439	Bid	3
ENSRNOG00000017528	Gpr157	3
ENSRNOG00000007545	Angptl4	3
ENSRNOG00000007077	Fem1b	3
ENSRNOG00000011901	Rrad	3
ENSRNOG00000031167	Srxn1	3
ENSRNOG00000010489	Samd4a	3
ENSRNOG00000056941	AABR07066529.4	3
ENSRNOG00000018598	Ankrd1	3
ENSRNOG00000016838	Pla2g5	3
ENSRNOG00000000187	Csf2rb	3
ENSRNOG00000048472	Comp	3
ENSRNOG00000057522	Fam134b	3
ENSRNOG00000013179	Tinagl1	3
ENSRNOG00000045654	Hspa1a	3
ENSRNOG00000018336	Eps8l2	3
ENSRNOG00000019065	Zfp385b	3

## Sheet: KEGG analysis of each cluster
#KEGG pathway analysis of differentially expressed genes in the exercise GK rats
Cluster1
	ID	Description	GeneRatio	BgRatio	p.adjust	geneID	Count
rno04974	rno04974	Protein digestion and absorption	5/46	94/8560	0.000137794	24269/84396/140448/25550/24213	5
rno00590	rno00590	Arachidonic acid metabolism	4/46	83/8560	0.00098387	29692/58962/296091/24886	4
rno04972	rno04972	Pancreatic secretion	4/46	99/8560	0.00189327	29692/24269/84396/24213	4
rno04964	rno04964	Proximal tubule bicarbonate reclamation	2/46	22/8560	0.00609482	84396/24213	2
rno04976	rno04976	Bile secretion	3/46	72/8560	0.0066862	25293/84396/24213	3
rno00980	rno00980	Metabolism of xenobiotics by cytochrome P450	3/46	74/8560	0.00721334	58962/24296/266603	3
rno00592	rno00592	alpha-Linolenic acid metabolism	2/46	25/8560	0.00783482	29692/296091	2
rno04970	rno04970	Salivary secretion	3/46	78/8560	0.00834007	24176/84396/24213	3
rno04022	rno04022	cGMP-PKG signaling pathway	4/46	167/8560	0.0120633	24176/84396/140448/24213	4
rno05204	rno05204	Chemical carcinogenesis	3/46	95/8560	0.0142438	58962/24296/266603	3
rno04960	rno04960	Aldosterone-regulated sodium reabsorption	2/46	39/8560	0.0184529	84396/24213	2
rno04024	rno04024	cAMP signaling pathway	4/46	197/8560	0.0209118	29627/24176/84396/24213	4
rno00591	rno00591	Linoleic acid metabolism	2/46	42/8560	0.0212245	29692/296091	2
rno04973	rno04973	Carbohydrate digestion and absorption	2/46	42/8560	0.0212245	84396/24213	2
rno04724	rno04724	Glutamatergic synapse	3/46	116/8560	0.0241285	29627/296091/25550	3
rno04978	rno04978	Mineral absorption	2/46	46/8560	0.0251708	84396/24213	2
rno00565	rno00565	Ether lipid metabolism	2/46	47/8560	0.0262008	29692/296091	2
rno00600	rno00600	Sphingolipid metabolism	2/46	49/8560	0.0283114	29204/94338	2
rno04913	rno04913	Ovarian steroidogenesis	2/46	55/8560	0.035034	24296/296091	2
rno04961	rno04961	Endocrine and other factor-regulated calcium reabsorption	2/46	56/8560	0.0362094	84396/24213	2
rno01212	rno01212	Fatty acid metabolism	2/46	59/8560	0.0398258	246074/50671	2
rno04261	rno04261	Adrenergic signaling in cardiomyocytes	3/46	144/8560	0.041839	24176/84396/24213	3
rno04730	rno04730	Long-term depression	2/46	62/8560	0.0435738	29627/296091	2
Cluster2
	ID	Description	GeneRatio	BgRatio	p.adjust	geneID	Count
rno05165	rno05165	Human papillomavirus infection	5/26	370/8560	0.00455696	363287/84482/84023/310683/116640	5
rno04152	rno04152	AMPK signaling pathway	3/26	127/8560	0.00646283	84482/78968/360937	3
rno04068	rno04068	FoxO signaling pathway	3/26	134/8560	0.00749501	303836/84482/689161	3
rno04371	rno04371	Apelin signaling pathway	3/26	141/8560	0.00862003	363287/24598/689161	3
rno05221	rno05221	Acute myeloid leukemia	2/26	66/8560	0.0168918	353227/24649	2
rno05202	rno05202	Transcriptional misregulation in cancer	3/26	184/8560	0.0176645	303836/84482/353227	3
rno04512	rno04512	ECM-receptor interaction	2/26	85/8560	0.0271424	310683/116640	2
rno00564	rno00564	Glycerophospholipid metabolism	2/26	98/8560	0.0352799	313977/246246	2
rno04933	rno04933	AGE-RAGE signaling pathway in diabetic complications	2/26	102/8560	0.0379533	84482/24649	2
rno04931	rno04931	Insulin resistance	2/26	109/8560	0.0428134	84482/78968	2
Cluster3
	ID	Description	GeneRatio	BgRatio	p.adjust	geneID	Count
rno04612	rno04612	Antigen processing and presentation	5/51	101/8560	0.000316266	294254/299331/103692716/25617/24472	5
rno04920	rno04920	Adipocytokine signaling pathway	4/51	74/8560	0.000945924	373545/89829/25125/83516	4
rno04915	rno04915	Estrogen signaling pathway	5/51	133/8560	0.0011122	294254/299331/103692716/25433/24472	5
rno04910	rno04910	Insulin signaling pathway	5/51	138/8560	0.00131168	373545/89829/686098/25059/83516	5
rno04512	rno04512	ECM-receptor interaction	4/51	85/8560	0.0015864	192362/29195/25353/25304	4
rno04141	rno04141	Protein processing in endoplasmic reticulum	5/51	164/8560	0.00280116	294254/299331/103692716/25617/24472	5
rno04659	rno04659	Th17 cell differentiation	4/51	109/8560	0.00392532	299331/25125/103692716/50662	4
rno04931	rno04931	Insulin resistance	4/51	109/8560	0.00392532	373545/89829/25125/83516	4
rno05145	rno05145	Toxoplasmosis	4/51	118/8560	0.00520635	192362/294254/25125/24472	4
rno05144	rno05144	Malaria	3/51	60/8560	0.00536975	25544/25651/25304	3
rno04213	rno04213	Longevity regulating pathway - multiple species	3/51	63/8560	0.00615397	373545/294254/24472	3
rno04510	rno04510	Focal adhesion	5/51	203/8560	0.0069232	192362/362332/29195/25353/25304	5
rno00010	rno00010	Glycolysis / Gluconeogenesis	3/51	72/8560	0.00890257	25375/25059/310903	3
rno05418	rno05418	Fluid shear stress and atherosclerosis	4/51	152/8560	0.0125099	24451/299331/25544/103692716	4
rno04710	rno04710	Circadian rhythm	2/51	30/8560	0.0136106	373545/170917	2
rno04217	rno04217	Necroptosis	4/51	161/8560	0.0151782	299331/25125/103692716/64625	4
rno04151	rno04151	PI3K-Akt signaling pathway	6/51	349/8560	0.0168699	192362/299331/29195/25353/103692716/25304	6
rno05020	rno05020	Prion diseases	2/51	34/8560	0.0172896	25617/24472	2
rno04514	rno04514	Cell adhesion molecules (CAMs)	4/51	176/8560	0.0203791	25544/25651/25066/24564	4
rno05165	rno05165	Human papillomavirus infection	6/51	370/8560	0.0218496	155430/192362/29195/25353/29577/25304	6
rno00350	rno00350	Tyrosine metabolism	2/51	40/8560	0.0235011	25375/310903	2
rno04066	rno04066	HIF-1 signaling pathway	3/51	107/8560	0.0256303	24451/25125/25059	3
rno04978	rno04978	Mineral absorption	2/51	46/8560	0.0304882	24451/689415	2
rno04010	rno04010	MAPK signaling pathway	5/51	300/8560	0.0322579	362332/294254/25112/24471/24472	5
rno04930	rno04930	Type II diabetes mellitus	2/51	50/8560	0.0355473	89829/25059	2
rno04068	rno04068	FoxO signaling pathway	3/51	134/8560	0.0453096	373545/25112/25125	3
rno05134	rno05134	Legionellosis	2/51	58/8560	0.0465515	294254/24472	2
rno05162	rno05162	Measles	3/51	136/8560	0.0469979	294254/25125/24472	3
